# Supplementary material for: Simultaneous achievement of high ethanol yield and titer in Clostridium thermocellum
Source: Biotechnol Biofuels. 2016 Jun 2;9:116. doi: 10.1186/s13068-016-0528-8 (PMC4890492; doi:10.1186/s13068-016-0528-8)
Supplement: Supplementary file 4 — 10.1186/s13068-016-0528-8 Proteomic data of strains wild-type, AG553, AG553, AG601 and LL1210 of Clostridium thermocellum. [file 13068_2016_528_MOESM4_ESM.xlsx]

## Sheet: Peptide_Matrix
		Raw MIT values (not normalized OR standardized)
Peptide	Protein	1004_Bio1	1004_Bio2	1210_Bio1	1210_Bio2	1199_Bio1	1199_Bio2	1149_Bio1	1149_Bio2
AAAALSSGTAAIHMALK	Clo1313_3008	48341.6		78228.9
AAAAVYTPEGQK	Clo1313_0652				253435	4501.75		146754
AAACFLPLTENPNLSK	Clo1313_1095			98468.6	20791.4		3271.55
AAADKNREEGR	Clo1313_1225	270.369
AAAEALGLSLYQYIGGVNAK	Clo1313_2090	1.78842e+06	3.62194e+06	1.01166e+06	3.21301e+06	1.50988e+06	7.50343e+06	5.14879e+06	4.69667e+06
AAAFPVVSTIK	Clo1313_1792	1.32024e+07	5.90539e+06	1.1372e+07	7.45367e+06	2.23775e+06	2.35549e+06	5.47789e+06	6.44888e+06
AAAGNIIPSSTGAAK	Clo1313_2095	1.3109e+06	1.65134e+07	2.10571e+07	3.68479e+07	6.18595e+06	9.98877e+06	2.11268e+07	1.47562e+07
AAAGNIIPSSTGAAKAVGK	Clo1313_2095		7821.14	20448.2	31778.2	4655.73	28250.6	6711.07	4070.39
AAAIATVLSMQPDILVMDEPTSSLDPR	Clo1313_2474			5502.5		4732.25		1498.55
AAAIDLAGR	Clo1313_1362	626142	1.33521e+06	51738.5	764633	196901	1.16376e+06	556670	516214
AAAIDQLEIWANR	Clo1313_1291	10748.9	1756.2	5941.51	8975.64	189.942	77615.2	6326.64	3196.71
AAAINIATGLK	Clo1313_0875					38090.2	2551.73
AAAKNYQDVVVIVDPSDYAAVLEELK	Clo1313_1012						5331.47		1682.89
AAALKEGEVLMLENVR	Clo1313_2094	6.68652e+06	391683	5.68073e+06	456207	1.96414e+06	422212	4.68312e+06	380032
AAAQEYAQR	Clo1313_0035							1813.68
AAAVIAK	Clo1313_1390			7278.65	39744			66386.7	126711
AAAVIESSK	Clo1313_1013		1537.29	37479.4	142273	7294.66	49419.2	108378	84826.9
AAAVINGVR	Clo1313_0521					1261.82	3643.3
AAAVKENKR	Clo1313_1454	9088.74
AADAVGVNFIGGFSALVQK	Clo1313_1811		2256.85						1239.38
AADIALYK	Clo1313_2852		13110.6		6203.01			32821.2
AADIVNELATVIQK	Clo1313_0890	838287	2615.86	105208	40799.4	9533.47	338517	45028.2	21092.9
AADKLAAYIK	Clo1313_3022		3301.34		2074.51		16895.7	4025.91	34660.3
AADKWLENIEEQGYR	Clo1313_1809	33662.9		38625.9	18118.5	1.60215e+06	268167	1282.3	15736.2
AADKWLENIEEQGYRLPIK	Clo1313_1809	13904.6		152.619		1.17985e+06
AADLDPIESLRYE	Clo1313_2434		254.272		6468.97		36425.2
AADLNGDGNINSSDVSLMK	Clo1313_1603					2929.38	1320.27
AADPNSNMYIGQFLK	Clo1313_1946	15332.3		117617		35898.9		117946
AADPNSNMYIGQFLKEDK	Clo1313_1946	3021.45		161687		33672.8	835.546	294075
AADVINDILQK	Clo1313_1076	6534.43	17728.2		133858	6188.97	152225	2953.23	155785
AADVNADGQINSIDFTWLK	Clo1313_1971					79281.7	65555.1		12335.5
AADYIGK	Clo1313_1831				45764			307904	185801
AAEANPDSLINK	Clo1313_0489			187678	102830		913.202	137004
AAEAYVEQFMALR	Clo1313_1590	1.23284e+06	48397.6	856249	39646.1	1.11948e+06	26162.8	1.18426e+06	16088.6
AAEAYVEQFMALRK	Clo1313_1590	538215	62883.7	417005	25879	341922	4936.39	348333	20147.2
AAEDSKFPFTVNFEQGK	Clo1313_2689					3868.04	2458.71
AAEEFKDQYLR	Clo1313_0193	51637.3	52511.7	31585.9	128620		60411.8	83384.4	1490.05
AAEEIVLGEVSTGAYSDLK	Clo1313_2926		16908.6			1890.38	10352.6	12789.1
AAEEIVLGEVSTGAYSDLKQANGIAR	Clo1313_2926		3780.47						1362.7
AAEEPLLNWDKR	Clo1313_2816			1271.85					22396.6
AAEFLVPLVNYK	Clo1313_1828	1.18896e+06	715331	111074	276683	1.98862e+07	1.56786e+07	695103	250918
AAEFLVPLVNYKGK	Clo1313_1828					9164.26
AAEIDAEVILLAK	Clo1313_1211		267.011
AAEIITSETKK	Clo1313_1888		19999.1					4743.98	2962.17
AAEILGFR	Clo1313_2896	88876.4	16188.1	8665.3	3742.16		2313.63	6699.01
AAEIPDAIR	Clo1313_0462	975040	55522.6	114939	284830		28536	966929
AAEIPDAIRK	Clo1313_0462	2.19445e+06	875345	717132	1.03117e+06	194442	359982	1.06744e+06	790773
AAEKHLNMMIGAIFNVPK	Clo1313_2220			10050.7				7530.05
AAELAEKEFGK	Clo1313_0815	5616.11	27354.1	21904.8	39286.5		25133	10999.9	2888.97
AAELIQDIFMSPEFR	Clo1313_1192	66067		1060.64		9469.09		8304.52
AAELSADSGGLACAK	Clo1313_1811						2998.19	6821.55	1483.5
AAEVFQK	Clo1313_0865						5495.09
AAFDYIKR	Clo1313_1289		690.19
AAFEISEKFDTPVIFR	Clo1313_1616			14090.4		1388.48	3413.26	39526.9
AAFILPK	Clo1313_1530	434515	86780.7		233066		227562	219252	540317
AAFLAK	Clo1313_0640	35217.1						73249
AAFSSSK	Clo1313_1135							1339.75
AAFSSSSGTENWYLIR	Clo1313_0419						2773.92
AAFVEQIEAYEK	Clo1313_2643					2256.66
AAFVESIGELGIK	Clo1313_1143						16799.1
AAGADSSFAK	Clo1313_2303				1579.75			1209.37
AAGADSSFAKEELDELVSLTSSLK	Clo1313_2303		620.595	320.358	53811.4	12950.9		21784.5
AAGALNWAVQEMVNR	Clo1313_1118	13466.8				4159.62		8491.94
AAGIEGTAIIAHDKEK	Clo1313_1154	1533.49		2160.89		7956.08
AAGINVVVAK	Clo1313_1283	25040.7	167249	330412	617013	146786	493474	306188	203608
AAGLDPER	Clo1313_1495	8587.79
AAGMNGMIAGQVIDLESEGK	Clo1313_1390	4966.28		29528.8				67960.7
AAGMNGMIAGQVIDLESEGKQVDNEILNR	Clo1313_1390			5850.28				30846.8
AAGNHNLDILASPEGLK	Clo1313_1025	57716	92273.4	38949.5	50792.9			45256.2	23437.6
AAGPELLEECR	Clo1313_2715	917.228					63265.2
AAGTLSGGEAQR	Clo1313_1916					7364.36
AAGVACGLK	Clo1313_2150	208407	35264.3	94055.8	18128.2		65801.5	215389	4444.77
AAGVDVVIGLGGGSSIDTAK	Clo1313_1827					2.26601e+06	354214
AAGVNTVSFGK	Clo1313_1178		20358.1		21055.2			24439.3	2914.61
AAGVNTVSFGKK	Clo1313_1178				7761.01
AAGYIAGYGSNVFKPDNYITR	Clo1313_0397	93928.9	75336.8	229911	48268.4	37863.2	75830.3	346221	75610.4
AAHLPGVLAAFTPLPVIGVPIK	Clo1313_1008						338063
AAIAAGADGLIVEVHPNPK	Clo1313_2468	3.40455e+06	1.59092e+06	1.94563e+06	1.0722e+06	3.58837e+06	4.68542e+06	4.08741e+06	2.659e+06
AAIANEYQGK	Clo1313_2446		807.79
AAIDAINAGFTK	Clo1313_1467	354102	191564	40921.2	498492	192709	173544	202940	472925
AAIDALMDAGRPK	Clo1313_1262	140587	30641	109284	3791.72	165868	28620.9	294714	3032.65
AAIDDYR	Clo1313_1502		133244	162424	174144		243672	365208	283349
AAIDEALLCK	Clo1313_1046	386048	1.14022e+06	2.45099e+06	2.02634e+06	14174.3	1.52274e+06	3.61567e+06	1.45008e+06
AAIDEALLCKESGEAK	Clo1313_1046			924.411	40968.7		1060.57		98314.8
AAIDEEKLNK	Clo1313_0950	12403.3	56928.4	5640.13	1733.3		53847.3	34205	8219.64
AAIDKLSAK	Clo1313_2303				107650			9512.46
AAIEAIDECLGK	Clo1313_2092	1.12768e+06	489442	970049	2.47061e+06	142454	956905	4.43945e+06	2.94914e+06
AAIEMLSHSFHNLMPK	Clo1313_2015					107509
AAIEQQLLNFNGSYSTEK	Clo1313_1222	1134.34	7603.09	2905.07	3537.74	245.425	1456.25	4432.21
AAIEQQLLNFNGSYSTEKQDTPITPDQLFK	Clo1313_1222	95780.8	165953	26446.2	96534.9	12346.7	42773.1	125957	72438.4
AAIIVKPEDPYDNVVENFEIR	Clo1313_1589	28679.5	10911.6	9335.12		31266.3	9804.62
AAITADEIAK	Clo1313_0949	2851.99	454865	185925	341663		744611	590330	289007
AAITGHLVFSTLHTNDAASSVTR	Clo1313_1106		1410.13	4045.17	1049.31				917.229
AAKMGDFLR	Clo1313_2747					74525.8
AAKMVASFYGEDKIRVVK	Clo1313_2247		223.628
AALAALEGPQEIIDEMSAEFVK	Clo1313_1467	38620.7	233.72	107659	22688.7	157171	5675.84	734150	8042
AALAALEGPQEIIDEMSAEFVKR	Clo1313_1467	1014.73		28245		6606.85
AALAGILHDCAR	Clo1313_1017	89545	112949	131548	160111	51743.1	190811	68228.5	65796.7
AALATDSFLSAASFQETTR	Clo1313_0314	21885	276918	14276	16576.7	13636.3	22224.5	31411.9	19893.3
AALEALIAELEGGSR	Clo1313_2325	20824	2638.27	1637.88		261812	39007.7	177533	1892.59
AALEASVR	Clo1313_0720	27422.7				11553.9	169703		8706.92
AALEGAVK	Clo1313_1372		21631.9		212621		24873.6	1052.83
AALEGFKDVEGTR	Clo1313_0867	448366	309920	312621	257226	232256	607335	449766	357585
AALKNNINTVPTSSMGR	Clo1313_0567					1835.46
AALKNPDIYAEYTPGSGGPGGGPYNDDYVGDEFYWAACELYVTTGKDEYK	Clo1313_1809					63168.5
AALLAVK	Clo1313_1581					54728.6
AALSAVALHLPK	Clo1313_2925	29121	285141	1329.03	284080	8382.2	596855	10268.4	837294
AAMAIYNK	Clo1313_2097	5731.38				2231.28
AAMEHGLK	Clo1313_0472	817362	14462.7	46648.1	4701.81	116748		772023
AAMLLIALGPER	Clo1313_1754	2774.48
AAMNLMGMEVGK	Clo1313_1254	135882		171097		176095		225870
AANELGIK	Clo1313_1087	25784
AANESRDEIAQAIK	Clo1313_1775	152254	144209	134990	145860	4778.68	33542.9	78166.3	46852.4
AANFFK	Clo1313_1686							42247.6
AANFFKR	Clo1313_1686	62062.2		37894.6	167209	6382.81	3269.44	67664.5	83932.4
AANGESIER	Clo1313_1867		28819.7				8688.6
AANKVAEDLGIAEK	Clo1313_0883						39557.4	29334.3	63173.6
AANLVSVVDPSIPK	Clo1313_1439		51622.9
AANLVSVVDPSIPKK	Clo1313_1439	38016.8	19974	23464.3
AANMPNETIMR	Clo1313_2734	325420		227286		63828.3		659542
AANTTVKLEETR	Clo1313_0629				35813.4	26257.5	46843.2		68250.3
AAQEDKDKSVIDDIKER	Clo1313_1444	4901.92				642.945
AAQEEYNKGR	Clo1313_0865		270.682
AAQFIFLNR	Clo1313_2275	1711.84
AAQGGFTNATDMADYLVK	Clo1313_2055	25519.2	6467.51	33906.9		16091.3		120173
AAQGGFTNATDMADYLVKK	Clo1313_2055	27570.6		9174.58				17484.8
AAQGRPVLEFGTR	Clo1313_1082	118592	42435.6	95839.9	91206.6	82368.9	47623.3	154122	65988.5
AAQKEIEQLR	Clo1313_0749	89503	32497.5	3496.46
AAQLVEELGIGTVCK	Clo1313_2017	59069.9	27417.1	77662.4	24674.7	7947.76	7637.46		1732.09
AAQMLGK	Clo1313_1186	11668.4
AAQMLGKPIESLK	Clo1313_1186	2.23108e+06	189128
AAQNWISENPEEAVDIIINGK	Clo1313_2336		507241	6068.97	9774.85	358411	6171.09	108019	6609.99
AAQPEFDFSADVNLTFK	Clo1313_0266					7028.58		3441.95
AAQTDKPAAK	Clo1313_0646	155.174							601.115
AAQTGGPSGGCIPASHIDTPIDYDSLTQLGSMMGSGGLIIMDEDTCMVDIAK	Clo1313_1882					9929.96
AAQYVR	Clo1313_2638							911.375
AAQYVRNHPGEVCPAK	Clo1313_2638	10259.4		17005.1		3101.7		33618.4
AARPLLEFAK	Clo1313_2530	93656.2		143568	11362	125158		87154.4	2176.4
AASAENIVFAPGR	Clo1313_0280						39164.7		39176.6
AASDFGGIEEFDAKYDELK	Clo1313_1407						4250.6
AASEIVETVLK	Clo1313_0612					10372.5
AASGLKDANDSSPHK	Clo1313_0400	9042.18	15173.5			109082	14043.2		3306.25
AASILNFCAQNNIAVR	Clo1313_1305		1609.02		14194.1	51840.4	48748.7		69742
AASLGNTMLLMSGAMGVVALVTSTYNFMK	Clo1313_2642	10589.4
AASMAVCK	Clo1313_1875			21016.3		25903.4	3240.74	261211	3044.25
AASMIVKK	Clo1313_1185	49139.4	18391.2
AASSILFK	Clo1313_0450	477205	100817		100028		11093.4	200572	66302.6
AASSSDVAVVFAGLPDEYESEGFDR	Clo1313_1002	10427.1
AATACGGSDFGR	Clo1313_1580	20882
AATACGGSDFGRAEELCR	Clo1313_1580		2144.62
AATETGAIVTCEEHSVIGGLGSAVAEVLVETCPVPMR	Clo1313_0296				24580.2	1975.5
AATLVHCETPSGITNPIADICK	Clo1313_1964	1.69363e+06	1.33118e+06	1.22252e+06	534094	331799	769595	646410	963928
AATQCALR	Clo1313_2265	15908	39938.4	13792	23798.6	16972.6	39621.6	108617	45890.3
AATQCALREDK	Clo1313_2265	584174	357984	217489	447035	174054	144197	1.07068e+06	392441
AATQCALREDKLIFYGNDELGYK	Clo1313_2265	38672.1	292021		313586	76975	175932	129400	223602
AAVAHGLGNAR	Clo1313_1881	815339	3.34383e+06	1.03498e+06	2.19722e+06	989071	1.74478e+06	2.24625e+06	2.0976e+06
AAVCTNSYMAR	Clo1313_0184	95935.5		73000.5		58156.2
AAVDILRPDR	Clo1313_1776	11806.7
AAVEEGIVAGGGTALVNVIPK	Clo1313_0433	1.13834e+06	1.7244e+06	1.10968e+06	3.1699e+06	166008	2.47394e+06	3.75428e+06	3.12171e+06
AAVEYAK	Clo1313_1452		20478.9
AAVIGGGLGTAIAYPQAK	Clo1313_1848	231815	10794.8	313233	258688	272932	95480.2	665477	91354.2
AAVIINNFIDYMR	Clo1313_2602	1587.95
AAVILSER	Clo1313_1914	129186
AAVNVSLQVIPCVPENQIYPVVDK	Clo1313_2773						13787.8	29234.1
AAVPSGASTGAFEAVELR	Clo1313_2090	5.63273e+06	2.51779e+06	4.42201e+06	2.7721e+06	4.71153e+06	4.37825e+06	2.28395e+06	3.63468e+06
AAVPSGASTGAFEAVELRDNDK	Clo1313_2090		6457.12	29048.8	11809.6	54293.2	46770.5	9978.08	25444.4
AAVPSGASTGAFEAVELRDNDKNR	Clo1313_2090	204253	171201	120819	106230	132400	175072	69277.2	127771
AAVSVLSAISPSR	Clo1313_2052		3442.77
AAVYKEFAK	Clo1313_1694				40906.1	6240.47	38158.2		11733.3
AAVYNEGR	Clo1313_1021					8649.11
AAYEDPYFEDSLMK	Clo1313_1194	4.46589e+07	931152	2.70717e+07	1.14351e+06	2.47812e+07	423563	3.54007e+07	1.32081e+06
AAYIGGCAGTACAIADR	Clo1313_1082					1177.64
AAYIHATQQLEEAR	Clo1313_1656	11059.7	1049	13683.2			5381.83	9571.51	6116.93
AAYSSGKPAIGVGAGNTPAIIDDSADIVLAVNSIIHSK	Clo1313_1798	15571.5	462063	179024	1.31524e+06	121134	310496	280411	1.37829e+06
ACAEIGIESFEYALEENTTQEELIELIHK	Clo1313_1120					3105.61
ACCLNDNLSLEK	Clo1313_1677	40692.1	89718.7	61938.4	75456.8		120913	180941	94374.8
ACDIGWNHNTSEYER	Clo1313_1065		1998.68	31704.4	6150.31	23121.9	12912.2	8377.05
ACDIGWNHSTTK	Clo1313_2677	29885.7	22570.7	48121.4	18451.9	60957.7	66322.7	57921.1	35789
ACDIGWNHSTTKYEK	Clo1313_2677			7675.89		1795.05	8852.58
ACDNTINCTCTYTSCSR	Clo1313_2231						8646.27
ACDTLGYGVSYPGAALPR	Clo1313_0708	478527	50512.7	338966	373734	93268.8	89328	576695	429858
ACDYKEGFLQSLVGDR	Clo1313_2816					1284.12			1991.43
ACEMCVASCPK	Clo1313_0066	165967		613.111		7218.15		363143
ACFTYTLNNQK	Clo1313_2451	69350.3	52380.7	9685.56		32168.3	28385.8
ACGISGYLLGVNPFDQPGVEAYK	Clo1313_2015	65292.7	13923		6226.31		13285.1		10335.6
ACGISGYLLGVNPFDQPGVEAYKK	Clo1313_2015	1.26798e+06	200130	830861	113246	294243	178436	631050	128897
ACGMLLAR	Clo1313_1005	30853.1
ACGVCDSCVLR	Clo1313_0656	217367	211962	169728	20181.2	92443.5	451685	365288
ACMYRDDVFVR	Clo1313_1357	102679		205005		40979.7		155566
ACPFDAIVLVNGVAR	Clo1313_0066	52338.8	20459.2	369554	296164	357639	33790.9	465417	375031
ACPGCGSCSGMFTANSMNCLTEVLGMGLPGNGTVPAVYAER	Clo1313_0304	2674.77				1390.4		761.921
ACPLFVPLVEEGWWENDIALR	Clo1313_2608							22714.2
ACPMNLLPLYLNNNSIR	Clo1313_0061	138242	38481.5	65021.1	89087.5	76857	70831.2	877240	68020.4
ACPTGAIKK	Clo1313_0066	93163.7	160943	5826.19	69372.7	97557	7568.28	396872	310799
ACQTPIKEGMVICTNTPK	Clo1313_0554	50344.2		8066.93	1467.87			6187.08
ADAAMTDGQDVGLDLTGGWADAGDGIK	Clo1313_2189					8193.69
ADADVEILNPEHK	Clo1313_0474	690612	357129	290496	285273		424187	401584	274214
ADAEAYLGEK	Clo1313_0933		4419.94		11346.7
ADAELQAVIDRFDDIVK	Clo1313_0873	242869	43229.8	4894.34	13793.7		97825	76734.3	55310.7
ADAIVMGSPVYFGSVSAQLK	Clo1313_1349	1713.87		21996.7				11316
ADAVLAASLFHYR	Clo1313_0429	148754	128139	11314.6	153529	67838.3	335865	436273	325521
ADDGDAAFGTIDSWLVYK	Clo1313_0073		1665.51
ADDILTAIR	Clo1313_2450	290343	94547.1	287.977	74030.2		55121.9	193645	77005.5
ADDITLIGDSAGGNLAAAVSLMAR	Clo1313_1073							631.656
ADDKVVAAMVR	Clo1313_0498	214869	5353.96	103163		3417.6		166786
ADDTGVYTYFETPEK	Clo1313_0084		1445.67
ADDWSDLQALVAALNAPK	Clo1313_2188						2412.94
ADEDAEYVATYEIDLSQVKPTVAFPHLPSNTR	Clo1313_2884	635441	115454	9369.04	113194	142184	83227	88764	44650.2
ADEGIINNWYNGAK	Clo1313_2693				19539.3	57864.2	3728.38		8879.86
ADEMVTAEISK	Clo1313_2801			3449.94
ADFIKADNESYNSLDYAK	Clo1313_1001		21048.4
ADFMILLVK	Clo1313_0950	661.366				104.686
ADFSGISEGLLFIDSVIHK	Clo1313_0988			183.094	1872.01			26160.5
ADGDIILR	Clo1313_1724		2733.72					783.643
ADGEVMDLNHGMPFVRPVEIYR	Clo1313_1160	14292.1
ADGFISGEATR	Clo1313_1821					8124.65
ADGIIPLEEYTDDPNFNIEK	Clo1313_1510	130740	103638	259727	163113	221277	82913.8	140346	99662.4
ADGIIPLEEYTDDPNFNIEKEVK	Clo1313_1510		2155.63			1098.19
ADGLALGK	Clo1313_1013							29896.4
ADGLILGSPNYLGNLTAGFR	Clo1313_2288								3934.13
ADGPHMLVAGMTGSGK	Clo1313_2642					5907.16
ADGVHIGQDDLPIEK	Clo1313_1628		12033.3	899.56			21722.7	16445.4	22955.5
ADIAMSGLTVK	Clo1313_2952	61493.3	4197.9	160669	5893.31	13175.4		256936	9827.15
ADIDAVVENIK	Clo1313_2891		92839.3
ADIDYGFAEANTTYGK	Clo1313_0451	1.47009e+06	512004	601430	471817	221618	130523	179400	236674
ADIIILNK	Clo1313_0568				49637.9		2884.29	8838.15	16047
ADIKEINNK	Clo1313_2271					504.849
ADIKPGDFVICDQFVDR	Clo1313_1606	253727	264499
ADILPMWVADMDFK	Clo1313_0389					7529.23
ADILVVAVGKPEFIK	Clo1313_1120	172730	2966.85	80270.2		116329	134484	17697
ADKELWYMLNNTLK	Clo1313_1020							18775
ADKELWYMLNNTLKR	Clo1313_1020	15770.9				19853.7
ADKILTCK	Clo1313_2153	2273.66
ADKLIIVESPAK	Clo1313_1760						6423.84
ADKVLQER	Clo1313_2637							3619.05
ADLEGHEETVGDNEIYVSAK	Clo1313_2190			1581.09				2957.71
ADLIVVAPATANIIGK	Clo1313_0943		26870.8	214453	27183.2		14515.2	49821.3	16409.8
ADLLIYGMGEKPILEIAR	Clo1313_1119					7876.82		4431.11
ADLTMCLPYLK	Clo1313_1795	262736	3698.06	61469				56945
ADLVVDGIFGTGLK	Clo1313_0287				12698.5		17865.2		35945
ADMDAIPIAEENDFEYASQNK	Clo1313_2731			1810.07		16170.8
ADNESYNSLDYAK	Clo1313_1001		573.118
ADNFDQLILLIESAVK	Clo1313_0870	340.232
ADPVILEPIMK	Clo1313_0318	123681				748.935		65509
ADQALYHAK	Clo1313_1404	7904.15	7617.14
ADQKFEYPVK	Clo1313_2162	61683.2	42797.6	108093	51402.9	1449	142889	54913.5	28961.5
ADQYYVNAR	Clo1313_1209	838987	593199	468669	703032		434611	515243	507252
ADSASQCIQILTHGERPNVK	Clo1313_1683	57091	57224	14736.8	26310.4	13803.4	154918	20200.2	96537.2
ADSDLLGK	Clo1313_2881		270597		59479.5		6119.19	25590.5	39134.4
ADSDLLGKEVFNR	Clo1313_2881	48601.1	59121.5	102999	116018			157792	78426.9
ADSDLLGKEVFNRNEVTIIGK	Clo1313_2881	25567.3	58193.1	21535.8	22624.8			151646	161313
ADSEEALAQQK	Clo1313_2832				34130.8			68846.6
ADSFNAAGGPLFTEVTSALFTK	Clo1313_0022	5.80236e+06	3.55457e+06	1.89184e+06	2.78977e+06	2.06202e+06	3.62824e+06	6.17283e+06	6.46511e+06
ADSWLNPVVGLLDDPENQR	Clo1313_1589		12144				40171.1
ADTAEEVLANWEEIK	Clo1313_0245			416.811
ADTMFEHLTR	Clo1313_1954	332218		96127.6		5876.87		220303	6719.71
ADTPAVAIFGK	Clo1313_0102	66724.8	54492.3	1172.5	11984		4633.04	36287.9	9369.97
ADVDKNGSINSTDVLLLSR	Clo1313_1305								104733
ADVEAEGEFKEFNEK	Clo1313_0266	7664.54	30056	83750.9		63551.6	4066.69	57184.7	10514.7
ADVETREPEFDLASK	Clo1313_1106	15085.2	158750	162264	39325.3			102503	8975.03
ADVFIYNGAGMEPWVEK	Clo1313_1690							3375.35
ADVIYDCAGNNTTMEQAIK	Clo1313_1833			138399		18023.8		1.08126e+06
ADVKPVEEGNENGDEVGVFNGEEE	Clo1313_1109	116466	83810.7	79406	249439	10406.9	120462	188569	152753
ADVNEMLK	Clo1313_1967			9915.05				52304.7
ADVQGSVEALK	Clo1313_1225		28156		207500		11167.9	179558	181497
ADVQGSVEALKQSLEK	Clo1313_1225	84670.5	92791.5	2089.13	21135.6	241.163	7097.4	7806.45	13955.4
ADVRPYIQDFTASWLGK	Clo1313_2180	825.895		480.374				547.795
ADVYENFTDVDSVFAANPNIIENPKPIATFTYR	Clo1313_0873	91669.8	3075.42	46054.9		18240.9		56323.4
ADWDNPYITLNK	Clo1313_1434	88121.2	39488.6	805.692	2171.34		11456.1	152943	119404
ADWDNPYITLNKEFEAK	Clo1313_1434	575.297	1350.36	4608.91	2831.65			17735.1	580.472
ADWNDCLNLNCFSTVPDESFQTTTSK	Clo1313_1954	116152	10377.7	51831.1	29104.8	49476.8	29206.5	4555.96	16165.8
ADWNDCLNLNCFSTVPDESFQTTTSKDGK	Clo1313_1954	3707.78	27452.2		1146.55		10341.3	21416.8	8340.38
AEAAVAK	Clo1313_0066						618.975	673.293
AEAAVIFAKLLGADENSAGK	Clo1313_0630								903.855
AEAAVILYK	Clo1313_0084		3609.84
AEADNVITQIESVNK	Clo1313_0587	766134	76351.6	139429	198480			17734.4	17789.7
AEAEDVPISFEFIK	Clo1313_0038						10884.9
AEAEIGSAEQEAER	Clo1313_1122		101483	215051	337037		233579	164463	188182
AEAFALLANYVR	Clo1313_0675						258882	115468
AEAFTVLWK	Clo1313_0884	32822.3	4897.76	20043.1	144674	146329	195820	343139	71496.2
AEAILAPSEQIPGEEYK	Clo1313_1222	7281.29		3294.8				17027.2
AEAILAPSEQIPGEEYKFNDR	Clo1313_1222	93002.7	39254.4	56461.1	48997.6		13090.1	63724.9	18775
AEAIMDLSSYGK	Clo1313_1627	29179.4	1621.27			92476.9		61243.8
AEAIMHSNVK	Clo1313_1724	91981.4		56755				172971
AEALLSGEQGFEVK	Clo1313_0039	85763.8	201648	22095.4	89539.3	4427.34	201975	1912.23	12532
AEAYGPITQGLAR	Clo1313_1185	207302	125562
AEAYGPITQGLARPVNELSR	Clo1313_1185	461917	406924				5422.39
AEDAAQVVLPSYK	Clo1313_0062						44032.6	110212	58587
AEDAVEAAK	Clo1313_0949		14580.2		6159.07		24500.7		37681.5
AEDAVEAAKNGEKDIILVR	Clo1313_0949						9069.12
AEDILAINPDGIMLSNGPGDPK	Clo1313_1267					4424		11599.1
AEDILAINPDGIMLSNGPGDPKDCVETIETIKK	Clo1313_1267			1800.31		57002.4		68276.9
AEDLNAEIHAVLR	Clo1313_1357	375.464		333398			11198.8	90004.5	3960.12
AEDYTDITIDTFNFDLR	Clo1313_2984								2797.06
AEEDSPDMYASIDK	Clo1313_0416	352355	8056.51	217477	13820	4563.79	3675.72	19471.3
AEEDSPDMYASIDKVIDSLER	Clo1313_0416	728154	65590.2	439641	41312.8	599309	73801.3	816809	21938.3
AEEFFGIQNLSDPDNMTISHHINQALR	Clo1313_0863					6074.1
AEELISQGRVK	Clo1313_1531								322.015
AEELLSIAHPLK	Clo1313_0406	423.131
AEELLVQADK	Clo1313_1750		1728.89					4166.82
AEELPEK	Clo1313_0552				16080			16558.5
AEENGVNIIGLTR	Clo1313_0995	92615.4			7068.95		34655.2	3310.62	47794.6
AEETGVLGVIGFK	Clo1313_1487						2255.49
AEETLNNYLK	Clo1313_1267		822.576	31984.2	39313.4		41684.9	116118	166920
AEETLNNYLKR	Clo1313_1267	88662.9	62663.4	110629	131627	112239	66700.1	166435	144074
AEEVEKLK	Clo1313_2540				1858.64
AEEVLNK	Clo1313_1682		63940.7		25501.3		162482	5751.17	42454.7
AEFATVTYK	Clo1313_0630		11105.1		257459	125009	630458	879351	268917
AEFATVVLHFLTK	Clo1313_0628					2812.9
AEFSEQDETSLLIEPGSIPVSELK	Clo1313_2938			976.136
AEFSTVVFK	Clo1313_0629				320808	9700.74	141745	397017	1.56912e+06
AEFTEAIVLAAGEVPKDPLLVESR	Clo1313_2602		150.416
AEFTQIIVNSLK	Clo1313_0090							14361.7
AEFTQLQAAVSHIANVAQK	Clo1313_1589						2015.56
AEFVTLINK	Clo1313_0397	1298.35	124825	520.929	188366		5459.98	25456.4	45847.5
AEGPEYK	Clo1313_1876							62227.6
AEGRPGDTVEIPVNLYGVPQK	Clo1313_0627		8207.84	41352.8	1.26131e+06	740786	1.14786e+06	7907.95	473921
AEGTSMVIETIFENR	Clo1313_0202	279.823		1532.99				26595.6
AEGTTIIENASKEPHVVDVANFLNAMGANIK	Clo1313_2989			2701.23		3175.3
AEGVTEFFIDESVYHSGGK	Clo1313_0646	30409.9	36571.6	126290	9597.18	39927.1	42251	234554	46684.4
AEGYDAIFIGSGAGLPSFMK	Clo1313_1849							119966
AEIAWQAALK	Clo1313_1808						32623.5
AEICEFTQTEPFFMAEVEEK	Clo1313_2149	1700.74				2251.9
AEIDGEMGDSHVGLQAR	Clo1313_1163	1710.26		253493		89735.2		25588.8
AEIEGLFGTK	Clo1313_1146	7212.09	1520.31	2711.06	1546.25		2735.85		7908.2
AEIELPLDTARTLAQTFEAMR	Clo1313_0581		57696.7		29316		10234.8		14395.6
AEIGEWYK	Clo1313_0717	16263.6						11951.7
AEILIEALPYIQK	Clo1313_2556		11221.2				553.473
AEIMWAGTIAHNGLLGTGR	Clo1313_2130		6131.25		15592.1		10335.4	52693.8	7882.67
AEISALMVK	Clo1313_0675	149391				1042.56		6605.22
AEIVHAAK	Clo1313_1214				4002.99	7848.17	104735	42213.3	37867.1
AEIVHAAKR	Clo1313_1214		11735.9		4812.62		2932.02
AEIYQTVAK	Clo1313_1578	5778.85	370120				308060		54122.1
AEKAIYTPGPAFLNVLAPCPR	Clo1313_0023				320.336		6280.62
AEKLIGIDVDILK	Clo1313_2647	9187.07
AELAAIIYK	Clo1313_0950	31815.7	135250	695.377	68196.9	35137.5	73977.8	17353.7	90542.6
AELLKK	Clo1313_0992			2051.83				4893.28
AELNALIK	Clo1313_2038					8745.11		6168.65
AELQVPVLSPVSK	Clo1313_2643						7266.14
AELVFTSENGEVSR	Clo1313_1944	1.43743e+06	1.09678e+06	1.23226e+06	1.12717e+06	798588	1.16863e+06	1.32055e+06	1.61906e+06
AEMAVIVVK	Clo1313_0884			13353.5		15017.7		69877.7
AEMEGHMK	Clo1313_2169	160227		6582.06		13759.7		205164
AEMFASK	Clo1313_0064							6158.84
AEMILQEAK	Clo1313_1861	10728.2	88388	2518.64				457266
AEMNVPHSR	Clo1313_1902	32428.2		425.613		1101.62		180244
AENDVVYEIICTSR	Clo1313_0198		9289.59
AENEALVILR	Clo1313_1613	307740	673655	447012	299712	184331	745691	896287	783242
AENEEQNK	Clo1313_1106							935.443
AENHYTIINEK	Clo1313_2982			3878.21				1108.53
AENSTGCNPECNAESNVENNVECSK	Clo1313_2748							2025.6	1067.52
AENVTLNIPR	Clo1313_0988	262314	40331.5	138119	83364.6		39054.4	184710	37262.9
AEPGQFIILR	Clo1313_1848	25674.2	12674.5		136273		39271.3	106911	8069.41
AEQAITILK	Clo1313_1724		2126.65	6879.8	3628.86	1049.8	5238.49	62419.7
AEQAITILKK	Clo1313_1724						5971.41
AEQFLIDLGFK	Clo1313_2533						1778.28
AERPVILAGGGVSIAGANK	Clo1313_0305		11284.8		4683.34		21840.4	32996.6	3992.13
AESDICCTSSNAVEVVK	Clo1313_3019	10091.6	14876.6	8119.18	4164.03		7070.94	9651.14	8267.37
AESFSDAIIK	Clo1313_1795		309985		2730.1		3213.05	7593.86	6137.61
AESKDMYIIR	Clo1313_0247	29762.1
AESLKPDYIYPYIGK	Clo1313_1785	2413.98
AESLLLAATEEQVNK	Clo1313_1601	3181.04	8515.48	166.509	4292.09	354.613	6460.43	2315.28	6522.92
AESLLLAATEEQVNKFAK	Clo1313_1601		6309.08		896.626
AESLVTMLSPELMENIGR	Clo1313_1498	273.749		75935.8				433039
AESMGMAHK	Clo1313_0954							2729.94
AESVALINR	Clo1313_0630				685040	1840.5	906587	801454	540286
AESYEPHWER	Clo1313_1694					1436.82
AETECQNTEYQQLLDIK	contam_sp|P13645|K1CJ_HUMAN		26710.4				12381.6	2867.05	26163.6
AETETVPDADAEK	Clo1313_2832		163812	52818.5	307725		228496	409405	193499
AETIQNAGVNTVILR	Clo1313_0313	136995	47387.5	159661	14552.1	35002.8	4338.97	8116.59	6731.24
AETLFEYDR	Clo1313_0880							6419.38
AETTLFLGK	Clo1313_0890	32747.8					3448.82
AEVATIMANILGLK	Clo1313_1897					7424.2
AEVFKRMGNHEKALQEIDIYLEK	Clo1313_1785					415.487
AEVFVTALPHGISK	Clo1313_2555	42923	7045.49	6186.42				20454.3
AEVIDSGGQK	Clo1313_2846		2547.62
AEVIDYIEK	Clo1313_0300	9234.15	9419.47		4168.69		6473.73	5228.4	8069.91
AEVIDYIEKDVK	Clo1313_0300		51564.2		12474.4		165760	65492.7	54656.8
AEVIVGEALK	Clo1313_1946			7456.43	29437.5	40054	11785.4	73538.2	11741.7
AEVIVGEALKK	Clo1313_1946	47869.5	261520	57537	486473	291.449	548684	639140	619751
AEVLDIKK	Clo1313_1240	3733.11	601.251	2695.96			13843.4	50802.3
AEVLLHHLETK	Clo1313_1150	4838.89	12730	8385.35	38288.2	4674.33	23380.3	59625.5	13143.1
AEVLQFMQR	Clo1313_1785	1758.57
AEVMALINGR	Clo1313_2876	968.178		1902.48				7940.84
AEVNAVVK	Clo1313_2303				7536.92			70250.2
AEVSLPGGCDFGFRPIDQHIK	Clo1313_2989								378.804
AEVTFFVPLNYNGEVQK	Clo1313_1954	300958	374371	136926	301524	4963.18	642266	1.13311e+06	341347
AEVTFFVPLNYNGEVQKLILK	Clo1313_1954					1874.3
AEVVAYDDLIK	Clo1313_1342	333950	223173	359611	323638	49627	132195	126007	2191.89
AEVYFINTR	Clo1313_2429	33257.8	122065	103261	135178	2802.83	105578	177563	50817.4
AEWEDWK	Clo1313_1960	76409.7		2772.59	37456.6	1940.53	151312		44441.9
AEYINSFYK	Clo1313_2981	22233.7	50519.5					2943.91
AEYLTVLLNTKPNLK	Clo1313_0675	35400.4	19574.1	27379.5	23566.3	145954	276868	143124	109298
AEYPIAVK	Clo1313_1882	3.97481e+06	76887.4	164326		55010.6	53234.6	620021
AEYPIAVKR	Clo1313_1882	252082	235521	6370.08	193616	6209.24	39353.3	72375.5	227847
AEYPLAVSR	Clo1313_1792	3.93669e+06	1.59842e+06	1.37291e+06	495891	662050	867450	2.41002e+06	2.03858e+06
AEYVSEQLEK	Clo1313_0740						132699		5974.41
AEYVSVAR	Clo1313_0440							54523.8
AFAAMLK	Clo1313_1857							20191
AFADSMGLAMSLEDLEFCQK	Clo1313_1683							5164.4
AFAHYR	Clo1313_0317	14668.6	13147.7		84340.7			7123.46
AFAIPSQSDTHK	Clo1313_0055	37682		4495.99		431372
AFALTGNIENTGLIEIPMGTTLR	Clo1313_1792	3.44292e+06	76598.2	4.68036e+06	158059	1.05305e+06		2.82524e+06	14870.8
AFASIENPFKEGK	Clo1313_2521	8056.73				5918.38
AFAVR	Clo1313_1020	132695			299015			194781
AFAVTVLDK	Clo1313_1808							944.394
AFAVTVLDKGQNR	Clo1313_1808	3672.94			29365.5	165713	82811	4099.71	44587.6
AFAYVNGYK	Clo1313_1000	1306.36	3414.17	2945.94				6081.26
AFCTMAMCK	Clo1313_1540	9660.04		1561.81		36968.1		49395.8
AFDENIENTTQLITAIDNELK	Clo1313_1036		11600.8
AFDGEIIK	Clo1313_2017	402194	27066.6		5948.57		11344.7	10694
AFDHQVLDQSAEK	Clo1313_0444	1.0785e+06	422190	398204	641917	90136.2	86162.8	677966	224312
AFDILNK	Clo1313_0913	4999.61	4227.44		2118.24		13284.6	1502.47
AFDILNKR	Clo1313_0913					229.56
AFDISMK	Clo1313_3017	53623.8						21401.3
AFDLLNIPR	Clo1313_1901	1197.85	1030.69	9722.44	449.059	1194.38	2010.24	3691.87	418.709
AFDRETHNVIYNK	Clo1313_2731	2062.49	4848.27			8373.67		601.112
AFDVGRKGNIFER	Clo1313_0016					40915.3
AFDVPPHCFVPQPEVDSTVIK	Clo1313_2750	3660.2
AFEEGYSR	Clo1313_1615	131912						49516.9
AFEEGYSRG	Clo1313_1615	270263	76509.9	1933.34	156062		184895		97220.2
AFEELK	Clo1313_1954		4792.19					34337.7	70946.1
AFEQIR	Clo1313_0296		44721				56814.8	39785.5	62877.3
AFFDKTR	Clo1313_1349	9398.68			22115.8				10316
AFFIETPTNPMMK	Clo1313_0388	215371		33310.1		95105.3		62345.3
AFFVGNTDPYGDGCALAK	Clo1313_0077	253314	232959	261092	369222	1874	8032.97	101037	55743.6
AFGFIELNDGSFFK	Clo1313_2162	63034.7		43178.7		523.366		10294.3
AFGIEEAQDK	Clo1313_2176	24346.9
AFGPNKAAAVIESSK	Clo1313_1013				5745.47				4280.61
AFGSIK	Clo1313_2464	112359						95893.3
AFGSLFDGIPGSGGNLFENFVK	Clo1313_0626					4205.85
AFHAHGDGEPK	Clo1313_3005		1400.85
AFIENEIPFLR	Clo1313_1270	25634.5	9847.55	90113.9	80897.9	85812.2	57956.3	166998	105532
AFIHGYK	Clo1313_1052	8154.76	8556.1	13960	31167.7	82062.7	66032	176976	9458.74
AFIIFQTLER	Clo1313_1730							375.67
AFINENYLK	Clo1313_0652							255826	55515.7
AFITDIVYGTLK	Clo1313_1666						13502.7
AFIVLTDIR	Clo1313_0294							701.843
AFIVTDNFLYNNGYTK	Clo1313_1798	17282	129269
AFIVTDNFLYNNGYTKPITDK	Clo1313_1798	73393.7	35012.4				1610.82		2799.04
AFIVTDNFLYNNGYTKPITDKLDEMGIVHK	Clo1313_1798	278294
AFKDFSR	Clo1313_0519				3117.99			4179.73
AFKEDELLK	Clo1313_1045	3363.2	1967.62	4944.53	488.684	7152.5		2506.24
AFKEEMGISPINYLLK	Clo1313_2885	8389.21		98100.4		84487.9		183325
AFLEVK	Clo1313_0795							32403
AFLFDELRPTPELSFTVR	Clo1313_0993	101475				168848		547220
AFLPLIK	Clo1313_1854							1022.07
AFLRQDPDIIMVGEIR	Clo1313_1106			7322.93
AFLTVELNAGQMVEDVR	Clo1313_1354	526.332		37376				2090.44
AFLVQK	Clo1313_1240	11376			20868	1465.28		1506.14
AFNFMSR	Clo1313_2993							616.167
AFNYYAPTEIIFGCGR	Clo1313_1827	8978.21		3521.12		1.22323e+06	85892.5
AFPMTLDAAVPEAEFPR	Clo1313_1742	163019		16310.3				7393.57
AFPMTLDAAVPEAEFPRGDK	Clo1313_1742	233716	3794.25	31968				9647.51
AFQFIGYDAR	Clo1313_0427	4095.06	44839.5	864.556	86516.1			27979.4
AFSAGLSAFEDDWANPK	Clo1313_0183	53694.2				45626.4	11808.4
AFSLAGAFSIAR	Clo1313_1493						62335.3		3772.69
AFSLAIDR	Clo1313_0510	56765.1	2320.14		21951.4			34295.5
AFSVIHDLK	Clo1313_1411	419573	273218	2272.82
AFTDIQYYETSTR	Clo1313_1922		916.342
AFTEVNFSGFER	Clo1313_2092	1.13839e+06	1.01928e+06	1.51676e+06	3.25614e+06	631296	1.55478e+06	3.64348e+06	2.89301e+06
AFTNDFLQNGQ	Clo1313_2775	319.802
AFVENVLVK	Clo1313_0884			74629	294989	170501	377481	260021	123557
AFVGEYKPTHYLLDR	Clo1313_0022	22450.8		6170.04	4474.17		95104.5	10771.5	6145.55
AFVGLK	Clo1313_0063	12716.6						4446.43
AFVGLKGEDVVGR	Clo1313_0063	249495	214677	73536.9	209101	61133.9	258582	187048	513433
AFVNFIQAK	Clo1313_2235	186932	415725	16758.8	1.0538e+06	28051.9	938075	185769	399722
AFVTFNLPR	Clo1313_0729	30758.7	2454.07	66107.9			3128.03	33651	1191.44
AFVTFNLPREELDIK	Clo1313_0729					3882.42
AFWPMGTGPNDK	Clo1313_1946	347343		568723		247758		1.27069e+06
AFYIAK	Clo1313_0305	113517						67405.7
AFYQYNGVVQR	Clo1313_2438	2300.48						25144.3
AFYTITPLGK	Clo1313_2068	75141.6			1482.59		5639.76	34143.3
AGAAEMLAFQPDTIIAVGGGSAMDAAK	Clo1313_1798	8.5738e+06	7715.24	1.34083e+07	12038.4	2.87658e+06	9475.13	7.65359e+06	19835
AGAALVLAGLVAEGVTEITEIEHIER	Clo1313_0202				932.003		1119.61
AGADELTFLDITASAEAR	Clo1313_0429		899.029	1030.02	4738.86		2077.98		6451.19
AGADKVSINSAAVK	Clo1313_0429	27668.8	9241.52	36646.3	5218.48	15905.4	3201.64	82328	195834
AGADYVGAEELVSK	Clo1313_0310	1.10522e+06	1.25948e+06	302204	1.02481e+06	122126	287025	556150	786180
AGAESANYPFCTIEPNVGIVAVPDER	Clo1313_1342	46642.9	12681.3	69739.5	28266.3	3200.33	24890.7	4022.58	26756
AGAGVNNIPVEK	Clo1313_0586	5.0996e+06	322433	762731	852076	2780.15	254671	563748	1.32879e+06
AGAIPTDACLDVPGLPQSATGQTTIFTGQNASK	Clo1313_2745			5178.88					9497.06
AGAMIGSGGLVVMDSNTCMVEVAR	Clo1313_1792	39806.9		270034		11244.8		68410.2
AGAPEGIIGWIDVPSLELTNLVMR	Clo1313_1798	645133		3.96353e+06		410994		1.75165e+06
AGAQAISVNNER	Clo1313_1137	48071.8
AGAQELIMSALLPAESYQASGR	Clo1313_0498	267771	2100.54	259497		119695		42450.9
AGAVAVPLNFR	Clo1313_0677	156898	277238	304887	172523		243480	495593	398927
AGAVYEGK	Clo1313_2054		5451.54		4077		4340.62	5657.33
AGCILTDTASTKGEIIDYVNSLDNPPCFIGGHPMAGTEK	Clo1313_2469			2664.99		4725.44
AGCVIDEQNTDNPR	Clo1313_0622						11257.8
AGDGGDGAISFHR	Clo1313_2071						27438.7
AGDHLYAPFVESVKK	Clo1313_0037		503.022
AGDIHEFCQPNAILTFK	Clo1313_1571	23755.3	16864.7
AGDIIPEVVDVVFEK	Clo1313_1178		3007.73	16097.3	12473.7		5076.51	1466.12	553
AGDIIPEVVDVVFEKR	Clo1313_1178						615.405
AGDILVGK	Clo1313_0313		75112.8		54490.9		80276.7	4536.85	66504
AGDIVENPSESFSYNVVEK	Clo1313_0630								5767.54
AGDNTYFLDLIR	Clo1313_1873	1705.09	19459.2	1054.03	9128.99	53481.2	2305.2	151357	24457.9
AGDTIKPIDIK	Clo1313_0202						2185.52		103433
AGDVIILLGGR	Clo1313_1683	2896.56					22441.1		16700.2
AGDVVSINGTIYTAR	Clo1313_0641								827.226
AGDWLGER	Clo1313_0729		527.273					6100.47
AGEADYHFIEIMACPGGCINGGGQPIQPSSVR	Clo1313_1881	2.51527e+06	164210	793929	82702.7	529644	105342	1.96202e+06	129538
AGEAGKGFAVVADEIKK	Clo1313_0587		1213.65
AGEAGKGFAVVAEEVRK	Clo1313_0707		1172.64
AGEAIVK	Clo1313_1963								99582.2
AGEAIVKK	Clo1313_1963	204196	60823.4	43079.2		10960.9		44148.8	44044.3
AGEGIVEYK	Clo1313_0498		369648	17224.6	77272.2		14571.6	5826.77	76091.8
AGEHYDLVEVMACPGGCINGGGQPFVQSEER	Clo1313_1791	2.09823e+06		2.12277e+06	75564.3	409969		2.71582e+06	93643.9
AGEIDYESACQYSVDMDNLR	Clo1313_1107							1242.9
AGEIDYESACQYSVDMDNLRK	Clo1313_1107					1315.03
AGEIVALALK	Clo1313_0467		7056.81						554.031
AGESGKGFAVVADEVRR	Clo1313_1963		658.055
AGETDELEDTVDYSK	Clo1313_0169						6229.24
AGEVGNYSYTGK	Clo1313_0013		85545.3
AGFETLVEAGYQPEIAYFECIHEMK	Clo1313_0101	196214		241745		16014.5		911823
AGFILDGFPR	Clo1313_0466	845179	688183	192470	496950	116558	296487	562323	457805
AGFITSADIK	Clo1313_0199		1980.99
AGFNENEKPVASLLFVGPTGVGK	Clo1313_1040	32390	9801.66
AGFPMEK	Clo1313_1540							2736.09
AGFVPVGEDQLPHLELTR	Clo1313_1537	178270	277362	58545.6	145621		260722		304160
AGGCPSQSEATAR	Clo1313_2179			3193.55		8346.99	21602.8	17471.8	342.676
AGGDKVNLVYSEGYR	Clo1313_1002	40928.3	38090.6	11993				18087.2
AGGEAAFIDAEHALDPVYAK	Clo1313_1163	380151	214492	483247	906388	266490	750462	442621	698205
AGGFTIEEEGGHQGSPK	Clo1313_0482	9503.55		8172.47		11724.3	994.475	3636.8	946.488
AGGILGGISNGEDIR	Clo1313_1491	37793.2	346804	497062	1.80162e+06	568555	2.90641e+06	944141	2.77913e+06
AGGQLWWENCK	Clo1313_2584	57631.2	26181.1			48384.7	18289.7
AGGVVDMLVIK	Clo1313_1683	76182.6		3164.24		746.826	42948	158056
AGHFNVPSGDYK	Clo1313_2275	2496.6
AGHITSVR	Clo1313_1504				711.925				3613.23
AGHRPIALIGGGTAMVGDPTGRTDMR	Clo1313_1500					32839.1
AGHTEAAVDFAK	Clo1313_2125	39425.2	13011.9	9239.86	46938.3	5607.86	36212.8	38930.1	123611
AGIAGDLTEYDNLIVNEIK	Clo1313_2891		171692
AGIAISTR	Clo1313_1630		8157.87		11527.8			10288.4
AGIDFFSTPFDK	Clo1313_2902	45650.1	80061.3	5036.99
AGIDKNR	Clo1313_0073		39022.8
AGIDKVELAR	Clo1313_0253						1144.77
AGIDTIIIPVENKK	Clo1313_2149	40113.7	30357.3		114912
AGIEELCPEFSISDIKK	Clo1313_1912						273.894
AGIENYRENLVNK	Clo1313_2521	3117.02
AGIEYASNQIR	Clo1313_2132						124252
AGIGIGDGTIDDMLK	Clo1313_2081							92627.6
AGIITGLPDAYGR	Clo1313_1717	633324	246034
AGIITYSDYANINDSPINDSWK	Clo1313_0054					20909.6
AGILDVYK	Clo1313_2470	202361	47409.2	6790.31	10785.7		131406	101724	48966.5
AGILETTFK	Clo1313_0101		1629.09	6501.94				18203.1
AGILETTFKEETETDLFGEQAVLCGGVTELMK	Clo1313_0101		12752.5		55555.4		40108.9
AGILIGQGK	Clo1313_1192		35065.7		5882.32		310261	3747.92
AGILIGQGKSPQEAMDEVK	Clo1313_1192		48833.1		344031		9182.45		473916
AGINTVEDLISR	Clo1313_0474	304291	876797	318168	1.43781e+06	16391.2	1.32163e+06	924322	2.11055e+06
AGINTVEDLISRTEEDMMK	Clo1313_0474	26430.8		5774.88		2583.53		18306.6
AGINVSINK	Clo1313_1362	8044.88	17647.5	1007.02	12163.4	10666.3	13915.1	29866.5	111410
AGINVSINKLEAHYLAGGNVDR	Clo1313_1362		113338		272210		375126		669261
AGIPANTTVEDIAGGTQNGNDIEWK	Clo1313_1897						1783.92
AGIPQADYLYFTR	Clo1313_2609	48943.3	16986.3	25295.1	13350.2		39418.8	48712.1	71197.7
AGISPNEK	Clo1313_1093							11456.2	2286.9
AGISPNEKYTMER	Clo1313_1093						1223.64
AGIVYSDIITTVSK	Clo1313_1947		39199.2	7349.11
AGIYTSLIR	Clo1313_2033					210430
AGKIEYR	Clo1313_0310	26795.9	172988		27565.4				40217.2
AGKLESGSETSLNDYNNLLAFIK	Clo1313_2816								5203.67
AGKPPVEPLYTYQDAVNCLELFR	Clo1313_1618	1699.26				19703.6		12861
AGLAEDGK	Clo1313_0313				1496.73
AGLAEVVK	Clo1313_1435							8446.4
AGLAYYAFSR	Clo1313_1231				1995.22
AGLENLGIDYK	Clo1313_0922	15803.8	603.753	2571.34	442.023		6015.66	392.55	76621.3
AGLGMVDGMLK	Clo1313_0185	987422		267306	45215.7	246247		1.42339e+06	12263.7
AGLGWIGK	Clo1313_2067		831.92
AGLIGFTK	Clo1313_1283	106300	330293	331605	2.80022e+06	83382.9	691931	606186	1.65252e+06
AGLIYGIGHAVYSISDPR	Clo1313_0578	104711	68039	807.162	406719	33226.6	317188	586059	132036
AGLKVPGVCYEGEGK	Clo1313_0198		4006.59
AGLLDDILDEIK	Clo1313_2189						5633.46		9349.39
AGLLTSPLR	Clo1313_2051	43345.9
AGLTFATALR	Clo1313_1106	50188	92059.4	22124	104425			147858	13113.7
AGMGAEAVR	Clo1313_0314	90105.8		8046.92		397.517		47650
AGMHADAVTK	Clo1313_0102	27256.4	19508.9	20032.2		15546.4		67857.5
AGMMYEGLLR	Clo1313_1995	1837.7
AGNAALEEVVTHIAAR	Clo1313_0857	1.09104e+06	546226	1.37522e+06	294658	188053	5931.55	682602	226757
AGNEYMLEEIQK	Clo1313_0023	721569	100067	487322	104353	62090.7	54026.5	1.39897e+06	229265
AGNEYMLEEIQKEVDLR	Clo1313_0023	1.57715e+06	110264	867251	181112	490200	61946.1	1.75226e+06	136801
AGNIDIFLPGNIK	Clo1313_1404		1543.09
AGNILVR	Clo1313_2072	100410						31246
AGNKEFVK	Clo1313_3022		1342.61			489.53	6549	1497.74	6225.49
AGNLVQQR	Clo1313_0880	1238.74
AGNVQEEIITEYSVR	Clo1313_1110		4023.32			5644.76	3026.78		3245.21
AGPNPCPPIVVGVGIGGTMEK	Clo1313_0640		7087.15					29769.3
AGPSTPVEILGLHEVPEAGETFYVITDEK	Clo1313_1225	365611	179824	383962	138584	158422	91915.9	750383	143049
AGQAIHIINNDTLLHTSNYK	Clo1313_2693					4190.08			14592.1
AGQEIRVK	Clo1313_0872								167857
AGSFEVEK	Clo1313_2497				6799.31
AGSFEVEKVKEAAKGLEFKAPEGLVK	Clo1313_2497			1132.01
AGSLFVCIEGFK	Clo1313_1240						16276.5
AGSLKPGESVELK	Clo1313_1958				16227.3		74870.6	15186.7
AGSVFEYDITGK	Clo1313_0757								32388.3
AGTEGVGTLSPGTLEMSNVDLSK	Clo1313_1746	38595.4		413.018
AGTFVSIK	Clo1313_1093					972.234
AGTFVSIKK	Clo1313_1093						6104.96		4025.98
AGTVTMDVAK	Clo1313_0310	19491.9	6151.41	49582.9		1343.57		221216
AGVEFAHSK	Clo1313_1205	2172.6					4058.17
AGVEYK	Clo1313_0311							25758.8
AGVFAVVLECVPYK	Clo1313_1316			94842.9		6186.3	3209.55	29857.9
AGVFGAEQWSENMR	Clo1313_1614	507149		704562	8809.52	336096	15847.9	780748
AGVGLNDGVTFGKEGLGFQR	Clo1313_0389		859.282						1589.59
AGVHSGDSISVYPTQTIGEK	Clo1313_1268		31228	46475.4	13152	76084.1	61706.5	102758	102206
AGVILATTSR	Clo1313_2127				7405.53	245.096	182411	9691.22	350015
AGVITQDQLENALSIQK	Clo1313_1106	85164.4	73570.5	132202	44157.7	105998		181668	11885.1
AGVITQDQLENALSIQKK	Clo1313_1106	72307.8	133659	26940.8	60016.1	13456.6	674.229	66140.8	35732.1
AGVIVEEWKK	Clo1313_0172		877.271					8624.56	20534.1
AGVLAEVR	Clo1313_0905	175527	94191.1		16604.1			5816.32	84875.6
AGVNPETDFATWDK	Clo1313_1194	5.26357e+06	2.05137e+06	2.14926e+06	1.14097e+06	2.60781e+06	2.19101e+06	1.43681e+06	4.91911e+06
AGVNPETDFATWDKFK	Clo1313_1194	6.72876e+06	2.40805e+06	3.76147e+06	1.34717e+06	2.65788e+06	1.52432e+06	6.23567e+06	4.4013e+06
AGVNPETDFATWDKFKDALK	Clo1313_1194	6.68275e+06	1.54516e+06	1.42892e+06	710627	1.26833e+06	1.05203e+06	4.21552e+06	2.23564e+06
AGVNPETDFATWDKFKDALKK	Clo1313_1194	436412	3304.63		137863	61997.1	52703.5	3724.5	243736
AGYDCIPQENMADLTATAR	Clo1313_0102	77485	7869.77	28388.8	5005.05	451.211		158974
AGYDVTR	Clo1313_2606						38443.8
AGYEHFMMK	Clo1313_1099			213.592
AGYKDELAK	Clo1313_2116		3810.69					148.027	2869.54
AGYKPGDDFR	Clo1313_2090	5.02671e+06	3.63551e+06	3.12954e+06	3.1506e+06	3.3415e+06	5.55194e+06	3.5126e+06	5.16715e+06
AGYQEIK	Clo1313_1029		3077.51		27044.6		3035.5	5436.49	8399.47
AGYSDRVNGEIINAGLGR	Clo1313_2893	788.799	14412.1
AGYTAVVSHR	Clo1313_2090	3.42662e+06	1.35866e+06	1.90958e+06	1.66479e+06	3.18447e+06	4.03813e+06	2.42255e+06	2.419e+06
AHALVSGR	Clo1313_1976	14200.9	37379.8	4912.44	9657.8	11624.7	20190.4	28938.9	12845
AHASFK	Clo1313_2980	25563.2	18014.9
AHASFKEGIENYVK	Clo1313_2980		2914.21
AHASTAGLADYLPAVCGYLIQK	Clo1313_2094	5.71366e+06	6.26474e+06	4.52219e+06	7.97031e+06	2.11537e+06	9.17716e+06	5.19345e+06	7.19938e+06
AHDDIKR	Clo1313_0328	613.673			768.234	161.156	353.026		349.508
AHDENNECKIGDIVK	Clo1313_0454		4583.25
AHDFIMQLPEGYDTVIGER	Clo1313_0549			221966		47166.8		639585
AHEDAIFLHCLPAYR	Clo1313_2561		7861.76					1705.83
AHELLHTHYEK	Clo1313_1881		3049.79				2146.27		17334.3
AHGLMK	Clo1313_0863					21904.6
AHGVTPDIYKK	Clo1313_1510			17294.9		17482.3		23649.2
AHIAVSR	Clo1313_2172		18530.4				12359.7
AHIER	Clo1313_1373	6186.17			6606.25
AHIFYPEATSER	Clo1313_0356					13655.1
AHILEGLR	Clo1313_3024	38966.5	21150.7	4749.1	11400.5	2801.56	2525.42	20951.2	9113.52
AHINEIK	Clo1313_0194		4515.83		10065.8			3287.94
AHLDNDNVCHIGR	Clo1313_1015					29766.3	25963.6
AHNDYHGIER	Clo1313_2088	81903.5	61703.4	6073.66	50731.1	1718.77	175122	2170.04	106158
AHNLSLEAHK	Clo1313_0909	1446.2		252.043				5109.01
AHPADGPAHEIIK	Clo1313_1867	639327		9503.09	29907.9	138617	81818.8		42201.9
AHQDFLIAR	Clo1313_2942	107237	10163.4	19033	4501.15	17197.1		12406.8	4092.83
AHSWFVGFAPAEDPK	Clo1313_0598					4199
AHTIANLAGFEVPETTK	Clo1313_1798	3.94297e+07	1.37414e+07	6.15376e+07	2.22053e+07	1.6282e+07	1.02802e+07	3.75488e+07	2.02239e+07
AHTYAAPNNALR	Clo1313_1460	24506.6	108886	107666	182050	64358.4	135771	254268	91424.3
AHVEGEINR	Clo1313_1304	88539.4	142881	48731	99202.6	1690.42	5425.12	97374.8	6967.36
AHVGELMTLLR	Clo1313_2264	2.44342e+06	117198	3.66776e+06	191299	2.06693e+06	187842	1.21254e+07	201440
AHVLVCGGTGCTSSNSNK	Clo1313_1882	3.23914e+06	375720	884695	975648	734269	1.22342e+06	1.49291e+06	676788
AHVLVCGGTGCTSSNSNKIITELEEQIAR	Clo1313_1882						15581.2		3806.43
AHVSVTTGYR	Clo1313_1587					1487.86	5846.94
AHWSESAMAYNR	Clo1313_0395	19440.9		1694.18				31211.8
AHYIDK	Clo1313_0898	11251
AIAALPPKEELVAK	Clo1313_0311	8.52919e+06	3.01012e+06	2.43735e+06	1.58487e+06	1.41915e+06	1.05368e+06	3.58047e+06	866681
AIAALPPKEELVAKALGSLK	Clo1313_0311						2040.19
AIADIK	Clo1313_0310		67835.2		64500.5
AIADPEKLDYALNMLGGVVEIFR	Clo1313_1138	434.89
AIADSLDADIDVESYK	Clo1313_1657	4391.21	12201.5	17626.5	5159.09		10818.5	62136.3	33773.6
AIADVARK	Clo1313_0390	80339
AIAEGKKPAVAK	Clo1313_0314		2042.93
AIAELDK	Clo1313_0295				36758.8			69888.7
AIAELDKILAGLEGR	Clo1313_0295	242617	3399.58	130545	280.757	55885.9	194071	264976
AIAIAR	Clo1313_1124	144771					144057	242467
AIALAK	Clo1313_1610								79972.7
AIANILLEEGYIK	Clo1313_0459	4.00469e+06	1.55329e+06	2.02654e+06	1.70241e+06	855844	473735	2.5565e+06	1.09008e+06
AIANILLEEGYIKGIEEIDDGKQGVLR	Clo1313_0459					542.213
AIASIEQELEER	Clo1313_1918		136420	3481.43	82346.4	18058			10167.9
AIASLVSDEELNPDFILPLPFDPR	Clo1313_1879	4.25146e+06	44432.7	2.23914e+06	19668.8	698271	22460.9	999142	28299.9
AIATHALSIFGDHQDVMACR	Clo1313_0673	31415.9	16850.9	83405.1	103033	97076.2	16590.2	122172	24620.6
AIAVEPEFIVCDEPVSALDVSIR	Clo1313_0511	114554	18040.3	60648.3	54535.8			62579.2	21713.7
AIAVGVPYDGDVWDFFCGK	Clo1313_2130	249226		454668		45221.2		1.21762e+06
AIAYAEQVHAGNHFNELK	Clo1313_2444	252102	177814	406223	246426	130202	122969	845905	227027
AIAYAEQVHAGNHFNELKDQK	Clo1313_2444	34943.9	203472		452604		53273.3		190941
AIDAAVR	Clo1313_2763		28735.6
AIDAIDRPEVK	Clo1313_3022					1356.03	30636.9	33710.7	28120.5
AIDAVYYLDR	Clo1313_2450	41792.7	2009.34	366819	143492	8824.89	209690	253515	20510.2
AIDELKEK	Clo1313_1798	3.85302e+06	3.35401e+06	4.73993e+06	6.28265e+06	808249	1.39489e+06	5.96396e+06	6.13474e+06
AIDENTYFTIPK	Clo1313_2339		3743.46
AIDENTYFTIPKPLSQER	Clo1313_2339	480504	1.20215e+06	297248	266296	826065	76686.3	1.81816e+06	478381
AIDEYLK	Clo1313_1849		36920.3	33012.2	16598		7829.17	459453
AIDFLISESGNRK	Clo1313_1312	69542.6	22047.4	33740.2	31077.1	17955.2	187743	71015.6	82991.3
AIDFVEEV	Clo1313_0021	2.04998e+06
AIDGISFTVR	Clo1313_2474				979.385	651.437	3353.92		1595.82
AIDHDIKLK	Clo1313_0634		265.81
AIDKYK	Clo1313_1741							3720.79
AIDLIDEAASR	Clo1313_2462	555357	471064	57131.5	224511	10910.2	66792.5	396154
AIDLNRPDANDPIDVVSK	Clo1313_0960						15205.6		15798.5
AIDSLDIK	Clo1313_2560		5695.9					8764.03	1149.1
AIDTVVQAIK	Clo1313_1040		381.034
AIDTVVQAIKR	Clo1313_1040	13101.5	32074.7
AIDVAPDGPYLEINEYLR	Clo1313_0613					57460.9	130239	3994.5
AIDVIDETGAYVR	Clo1313_1040		7906.11
AIDVLDEAGSR	Clo1313_1914		33613.1
AIEAADILK	Clo1313_0296		3614.85				4669.7	5558.04
AIEAADILKR	Clo1313_0296	451214	427192	18753.9	194944	202731	294858	304782	309572
AIEAAVNDMALISGQKPVVTK	Clo1313_0457	3.84793e+06	250035	2.03354e+06	345133	1.00972e+06	51922.1	4.1279e+06	121203
AIEADPSNVMGYSNK	Clo1313_0600	44375.2
AIEAGCDVVDCAISPMSMGTSQPPTEPLVATLK	Clo1313_1523			299.598				154771
AIEALADPEVFK	Clo1313_0745	21962.2	65122.5		103128		265231	164176	363810
AIEAYDVWK	Clo1313_2228	56971.2	4014.2		6801.38		33082.7	75750.9	5020.25
AIEAYDVWKEK	Clo1313_2228	867.407	40978.9		38241.3	15002.4	26279.4	41015	39767.7
AIECHTTGR	Clo1313_1017	14644.1	5605.54	2453.22	2422.67	1418.57	6996.56	15845	7256.05
AIECLNAAQNPIWAYNNGFDVVVR	Clo1313_2647					10494.2
AIEDHFDK	Clo1313_2847			307.663
AIEDHFDKSYELEQELK	Clo1313_2847		8000.96				14554.5		3646.89
AIEEAGEIR	Clo1313_1344		53668.1		385073	2265.01		96959.6	278245
AIEEAREKVAKAIGALPR	Clo1313_1503		1348.03
AIEELDMSEFK	Clo1313_2055							3674.67
AIEELEIVSPLR	Clo1313_2533	34588.8	141267	25457.4	187130	3431.6	196891	403984	113336
AIEENDIFPVDRPTISIK	Clo1313_0328	426483	208833	329633	206421	130792	130774	317976	168935
AIEENDIFPVDRPTISIKK	Clo1313_0328	92668	122646	6602.98	29979.8	21226.1	35936.3	39025.8	59648.5
AIEETLGISATVK	Clo1313_1614						1149.74
AIEGFEK	Clo1313_0684	7947.42
AIEGVR	Clo1313_0586							58110.8
AIEIADSYVDMFQVGAR	Clo1313_2468	75850.7	2463.61	50318.9	965.88	207890	8100.19	126700
AIEIDPDCGEAYGAK	Clo1313_0600	9424.34
AIEIIHAAK	Clo1313_2902	457623	14213.3	27060.7				2040.7
AIELAVENMEENNK	Clo1313_1503			16757.8		3025.11		2033.05
AIELAVENMEENNKK	Clo1313_1503	527056	11721.6	808203	18071.8	366143	808.091	1.03883e+06
AIELEVNR	Clo1313_1155	1.16947e+06	31371.1	75061.3	142365	9517.62	95523.4	109172	49009.9
AIELKPFYEEGWQLK	Clo1313_3009	8010.98		19242.7		956.795		69204.1
AIELNPNLAEIHYNK	Clo1313_0600	52637	592.642
AIENAVVNVLGMGYR	Clo1313_2882	2.09526e+06		441602		492021	817.919	367034
AIENLELFENGK	Clo1313_1227	39993.3	7409.47		6546.45		890.603	1728.24	3135.69
AIEQEQLK	Clo1313_1457		450027		69181.4			148556
AIEQEQLKK	Clo1313_1457	509938	418547	47977.6	241513		17484.1	225569	31428.2
AIEVDPSYEDSYINK	Clo1313_0270						7812.23
AIFDPNEVLDLGMTVCMYSMNR	Clo1313_1112					3050.77
AIFEAMNATVSWDDKTK	Clo1313_0737						1745.96
AIFEEASGIMK	Clo1313_1290			2139.53
AIFEELGYTVDWNDATK	Clo1313_1819					8564.9
AIFGEK	Clo1313_0313							83366.1
AIFTDEELK	Clo1313_0867		4131.91	2111.65			5493.94	4734.26
AIFTDEELKQK	Clo1313_0867	169444	78934.9	67444.6	78543.1	92298.4	135326	141971	118992
AIFTDEELKQKMDKGNFK	Clo1313_0867		11116.2		8313.21		8370.91		5630.68
AIFVAPGGSEQDILK	Clo1313_1902	337717	159490	511908	228264	17220.2	104358	342193	56311.9
AIFVAPGGSEQDILKEGTVFFER	Clo1313_1902	36902.1		30218.1		14149.1		3911.31
AIGALPR	Clo1313_1503	121080			16014.2		55142.6	75334.5	58350.4
AIGDVLGVDVVWNEGLR	Clo1313_1768		3259.53
AIGDVLGVPVQWNEK	Clo1313_2983					184165
AIGEAMDINHGLPFMGQMSLYAGDYSDVK	Clo1313_1878	27565.2		59961.7				86197.6
AIGEAMDINHGLPFMGQMSLYAGDYSDVKDCDVIVVTAGANR	Clo1313_1878				86933.3
AIGEEEHMIEILR	Clo1313_0349					9706.73
AIGELAGTR	Clo1313_0549				251103		302581	84934.4
AIGGNTVEIVHSLAK	Clo1313_2163	124785	65179	263.315	73568.1	42239.9	49554.1	10443.6	73954.8
AIGVDDIYNQIVVQPVDAK	Clo1313_0016	16228.8	95295.4			9435.73	66189.4	170882	84293.7
AIHAEQNAIVQAAYSGTSVNGGTLYVTTQPCILCAK	Clo1313_0186								1459.14
AIIENCFNR	Clo1313_1906	8326.59	16734.2		43486.2				3219.77
AIIENLK	Clo1313_1929							888.609
AIIEVNEDGSTAAGSTVVR	Clo1313_0988		2585.42	236.372		394.029	2983.95	2502.05	12635.9
AIIINSPNNPSGYIYSEETLK	Clo1313_1657	81449.8		28323.7	13174.7	12743.7	72340.9	122614	76797.3
AIIINSPNNPSGYIYSEETLKEIFEVLEK	Clo1313_1657			1592.79	21068.4	825.603		9804.72
AIIINSPSNPTGMIYSEEELR	Clo1313_1467	101282		190287		198445	1611.41	696083	3860.69
AIIINSPSNPTGMIYSEEELRAVADLAVSK	Clo1313_1467					563.454
AIIMAGGEGSR	Clo1313_2633	3389.66
AIINDKK	Clo1313_2633	1517.03	2232.3			4732.92
AIINNKSGWPAR	Clo1313_2192		824811		1.05739e+06		1.14743e+06		1.63635e+06
AIIPAAGLGTR	Clo1313_2847	50011.5	445582		164248	6024.19	493662	638831	489798
AIIPLTKGEENYLVITK	Clo1313_0013	5442.21	126332	2193.61		6991.02	4303.3	31202.8
AIIPVHFTGQPCDMDEILK	Clo1313_2894	128168		21083
AIIRDIDETWK	Clo1313_0857			1085.02				1922.29
AIKDIK	Clo1313_0038	62971.6
AIKEAEPGEIAK	Clo1313_0326	1950
AIKEFGLK	Clo1313_1434	60685	36437.9	25734.7		2983.51		15230.8
AIKENPHAK	Clo1313_2592	129.341						549.472
AIKEYNYYPNASAR	Clo1313_2023			8861.87				16342.6
AIKMIFEYLPR	Clo1313_1798						7192.34
AIKPGDGYLINR	Clo1313_1589	50671.3				30977.1
AIKVFSSNYSK	Clo1313_1797	8737.14	39385.3		95430.1		110680		17881.3
AILDGTVFR	Clo1313_1944	681724	509652	398659	781925	132888	1.3617e+06	978431	896679
AILDILR	Clo1313_2714						2743.55
AILEEIMLDVMYDIPSQENVEK	Clo1313_0330	1069.17
AILEKDPDCTGSLGIAISEAVEDAATHDDTNYALGSVLNHVCLHQTIIGLEAK	Clo1313_1046						23588.2
AILEVNPK	Clo1313_0413	28047.8	5228.3		244986	154511	15329.9	10345.8	24168.4
AILFGSLAK	Clo1313_2470	14245.6	90593.2	16118.7	15415.4		105037	51389.8	29382.7
AILGLSMSDSDMEK	Clo1313_0884	3617.77		315153		1.18926e+06		17509.5
AILGNPAPGTNLAAGDLNR	Clo1313_2189				2687.03	30994	1969.35		21620
AILGQDDSSYIFDEFIK	Clo1313_2559	289293	119088	12173.4	4286.18	17141.7	6452.54	105029	74941.6
AILKLDPEIEIYQK	Clo1313_2608	28876.9	1203.72	22271.3	1115.18		2476.65	9298.25	1413.56
AILLELIEK	Clo1313_1324	2037.05	249.268	3102.5	167.982	602.276		4266.9
AILLGIEPSDK	Clo1313_0049							4081.12	3137.83
AILSELEEVYDMINEGK	Clo1313_0172							15895.2
AILVFEER	Clo1313_1852			548.669		251.156	488.62	4615.1
AIMALLMGNK	Clo1313_2561	246932	579.1	266716	310.379	59216.3		369831
AIMEFSGK	Clo1313_2303					76841.5		5999.12
AIMPFGGIR	Clo1313_1717	601508	19092.4
AIMPFGGIRMVIK	Clo1313_1717	1549.41
AIMYITGMSNIR	Clo1313_2162	62679.2		1038.27		3173.65		44430
AINDTLGHSVGDMLLK	Clo1313_1813	25287.8		10717.7				5322.69
AINEELK	Clo1313_2433							2697.41
AININLDDIK	Clo1313_0054					6591.31	2696.29
AINIVK	Clo1313_1427	124637
AINKNMPVYK	Clo1313_1024								1561.01
AINLGTK	Clo1313_0656	89682.1	144433					116926
AINLISGKPYTVSGGEMATGSK	Clo1313_0799	1.09573e+06	51432.9	430701		22126.9		1.40215e+06
AINLPAGLGK	Clo1313_2446	1303.55	15086			253.14		38315.9
AINPAHQNPNLPIGFNIK	Clo1313_1794					60391
AINSSTCAVMIEPIQGESGVNLTSVEYMK	Clo1313_2558	17151.2		22613.1		11329.8		12290.6
AINSVIK	Clo1313_0857							122565
AINSVIKETENLTLYK	Clo1313_0857	227021	76373	263877	61346.3	2714	3853.29	103628	22404
AINTDSKEEFFAELAK	Clo1313_1607		17202.4	6766.56	1792.04		2230.25	1267.8	30543.7
AINVIDDMLETIITR	Clo1313_2917	2744.55
AINVVLVEPEIPQNTGNIAR	Clo1313_2104	34130.8		52723			33263.7	3320.68	4333.62
AIPEENEYFK	Clo1313_2906	5499.01
AIPEIDGLKPSHR	Clo1313_1921						9511.22
AIPGENGLDDQLGEQNR	Clo1313_2645						6659.92
AIPGLIVEVPSDANQMR	Clo1313_0075	301859		209993
AIPSTVESITNMYSVPNCK	Clo1313_2935	192388		53407.1				11885
AIPTEVPSIEQLGLPGLVYDLAMK	Clo1313_1107	573042	7054.34	725729		350083	4309.37	842013
AIPVLCGSSYK	Clo1313_0318	767523	366999	225430	338228	146015	322364	365229	316682
AIQAVYWANK	Clo1313_2747	7564.47	1111.43	40135	539562	3.29638e+06	2.2605e+06	132780	1.128e+06
AIQAVYWANKWAKEQGKGSAVASVVSK	Clo1313_2747					3267.29
AIQDGVNLK	Clo1313_2020		13839.2					104399
AIQDYNMIQDGDR	Clo1313_2845							1313.03
AIQKDQALR	Clo1313_1663		16969.3
AIQSADEMLGIANNLKR	Clo1313_0208	79937.6
AIQSELGDKDGVVGEVEEYKR	Clo1313_2149		27341.7					770.496
AIRDCVELAPLHNPSNIIGIEACK	Clo1313_1186		14359.2
AISAAVNESLR	Clo1313_1619						18241.4
AISDIAEVEDVLMVENIIPVER	Clo1313_1938			2317.03				45981.4
AISEAFGYK	Clo1313_1637	2265.98	9610.77					4659.44
AISLDDLLEEVGR	Clo1313_2606	92538.2	70294.7	210062	258058	4582.46	228794	212602	324493
AISLDDLLEEVGRDAAR	Clo1313_2606		11983.7		8628.13		4838.05	4522.02	3730.5
AISNPQQVAK	Clo1313_0099	3558.91	28234.9	1357.49	4671.35	329.64	5421.8	12075.5
AISSEFNCK	Clo1313_2038				9765.14	14981.3
AISSNIDPR	Clo1313_1491	1.55007e+06	738103	33191.7	532065	273627	995288	1.09543e+06	860415
AITDAYNVELVEVLTGFK	Clo1313_0993	12911.7	7236.51	170199	4062.26	2411.79	55793.8	1.05091e+06	27633.9
AITDPIGLINDYK	Clo1313_1888	101535	20590.4	46505.7		1301.25		38969.5
AITLTDDAK	Clo1313_1305				8550.75				10071.2
AITRRIMGEDVPLLNLGSEDGFMFK	Clo1313_2138				25833.2
AITVTYLTK	Clo1313_2974					3428.18
AIVDDPPVAVK	Clo1313_1445	1959.91
AIVDIKR	Clo1313_1683	5756.39
AIVEAVFQVDKK	Clo1313_1407							11245.2	11218.7
AIVEKLNLRK	Clo1313_1804		4097.99
AIVNEPEILLLDEPLGALDLK	Clo1313_1472	152923	117839	325960	71668.7	113948	350938	818668	127589
AIVRNPK	Clo1313_2554	102874	2190.22		846.53			51441.7
AIVVTTPEVSAVR	Clo1313_2138	544936	437639	510238	606916	249035	99506.5	718211	56955.9
AIYANVPVLDSGAR	Clo1313_0114	431366	11613.9		47809.8				39062.3
AIYEEDESLPIR	Clo1313_1881	360851	322366	9221.21	297503		294966	161241	329358
AIYEEDESLPIRK	Clo1313_1881	2.51821e+06	1.53201e+06	978640	1.40994e+06	496340	1.38042e+06	1.32467e+06	1.37676e+06
AIYFYECQQAGPLPEWNR	Clo1313_1603			22311.2		76631
AIYTPGPAFLNVLAPCPR	Clo1313_0023		4453.61		44231.7	10502.3	31617	31520.8	40886.8
AIYVESISNPNAALLDIDAIAK	Clo1313_2335	205625	753081	43000.6	3244.97	446822	1681.26	618707	22378.3
AKAIYEEDESLPIRK	Clo1313_1881		3830
AKANCDMLTK	Clo1313_1960	40343.5		4271.8		127574		5877.57
AKAYDIVLNGTEIGGGSIR	Clo1313_0923		11505.2		1833.78	1740.04
AKCDICSK	Clo1313_0979	6296.9						2374.59
AKCDICSKDVLFGLK	Clo1313_0979		13030.8		1012.99
AKDDAIDSVR	Clo1313_2815	11830.3	46032.3	103338	5545.69		22855.5	168416	59483.3
AKDEKELQEQYLK	Clo1313_0890	3515.18	11406.5		778.932	7246.25	18488.2	1166.08	7250.07
AKDESLFPEIRPMNSYR	Clo1313_1696			2203.46		3086.48
AKDFDDALDK	Clo1313_1798	505652	32692.6	603763	540068		19916	349831	179740
AKDFDDALDKAER	Clo1313_1798	8.70188e+06	6.34144e+06	1.7389e+07	1.38821e+07	3.05663e+06	4.01498e+06	1.44858e+07	9.51768e+06
AKDIMSSPVK	Clo1313_1539							763.321
AKDISLLGR	Clo1313_3024	7961.96	77266.7	481.568	10941.7		29402.7	66392.6
AKDIYAHEIIEGLFPVK	Clo1313_2553	1301.89			3169.58	2608.43
AKDLALLK	Clo1313_1969	22695.1	3101.48
AKDTVDMFK	Clo1313_1054			977.771		708.775		291.894
AKDVGLDK	Clo1313_1497							5727.79
AKDVLYR	Clo1313_1901					657.384		2921.07	1630.85
AKDVSGNSNSYR	Clo1313_0199		4272.68
AKDYALAYAAGIGAGR	Clo1313_0101	4.85371e+06	4.33343e+06	3.17831e+06	1.82934e+06	1.42505e+06	1.07932e+06	3.71089e+06	1.77433e+06
AKEAGYEVTK	Clo1313_1682	33424.3	59139.7	5310.15	82248	14698.6	104668	31314	86294.5
AKEAGYEVTKERLDEASEAIEEMIRNMAEQMKLSSPSEAESRDFLKEAR	Clo1313_1682		299.501
AKEEAEIR	Clo1313_1122	21623.5	72638.7	10123.6	97534		117469	24092.1	222710
AKEEGLIR	Clo1313_1992							8197.91
AKEESMEIR	Clo1313_2143	9226.16		41871		1290.8		148740
AKEEVAEGLK	Clo1313_0498	5230.13
AKEEVAEGLKK	Clo1313_0498	475479	97169.2	120925	12392.7	119067	50760.7	154294	78355.3
AKEFAQIYEK	Clo1313_1750	77725.1	35926.3					2711.8
AKEILKEDEVR	Clo1313_2150							49980	30050.5
AKEITDSLIQYK	Clo1313_0972		25085.4				21250.5	11132	30276.7
AKELCNNSEICTLTR	Clo1313_2004	5913.71	11599.4	17223.9			5037.06	15021.2	4487.73
AKELGELISNSDEMTNYK	Clo1313_1444	16540.3		8477.62		4624.79		49876.6
AKELGELISNSDEMTNYKK	Clo1313_1444	11427.2		34265.4				11630.4
AKELGLELMVTK	Clo1313_2125	31613.3		54428.9		16298.3		103494
AKELGYTQVLWLDGVEK	Clo1313_1364	204056	12728.7	71777.8		33160.8	3703.82	101112	12542.9
AKELGYTQVLWLDGVEKK	Clo1313_1364	10798.2	2382.03	2970.42	1282.52	505.906
AKELLGWTPK	Clo1313_2893	158416	148835	15237.5		2590.8		38720.6	12954.2
AKEMIEELKR	Clo1313_1491	164404	7874.25	403430	7537.87	319760	4799.08	608535	9846.68
AKENGGGFIIGGSNYGQGSSR	Clo1313_0709	342665	320795	273109	185971	100083	146726	276062	312976
AKENLALSGLADR	Clo1313_1951						29794.9		38386.5
AKEQSMEYGHSFER	Clo1313_1144			2145.41
AKETLEIYAPLAHR	Clo1313_0909	6705	4330.29
AKEYIDK	Clo1313_0466	33437.5	61753	2868.37	7222.11	6020.24	1789.22	20708.6	15384.6
AKEYIDKGLLVPDELTVDIVKDR	Clo1313_0466		4736.45
AKFDETVEAHIR	Clo1313_0310	1.4205e+06	301700	6347.77	66216.8	79863	52942	297341	269074
AKFEELTADLVEK	Clo1313_0933	318878	266281	282576	282573	208889	164301	360439	277248
AKFLKDWMELENISSRDWIIK	Clo1313_2807					16129.4
AKFTGAELEGMLCR	Clo1313_1434	7680.22		6306.9
AKFVPESGTIPSENYSETFNFKK	Clo1313_2519		1317.64			1405.9
AKGCDECNNTGYK	Clo1313_1106	34869	11807.9			779.616		8893.16	5080.27
AKGDLEIDAHHTVEDVGIVLGQAIK	Clo1313_0425				2194.93				9015.59
AKGDYYIVYGIEK	Clo1313_1819	420560	266029	96356.1		502204	28143	243726
AKGGFPGFGGNINNLVK	Clo1313_2801		6052.45
AKGGNILNVLK	Clo1313_1217	3360.12
AKGLSETVVIFK	Clo1313_0514			342.449
AKGYSIGTSLCEDDKVELAK	Clo1313_2094	70036.3	197095	99568.1	112711	15804.4	192641	46168.6	320101
AKHELEDK	Clo1313_0328								639.076
AKHELEDKVVAK	Clo1313_0328	66974.7	13504.4	12354.1	5431.14	28234.1			1505.95
AKIADVLIK	Clo1313_1861		32691.8
AKIDMASPNLNMR	Clo1313_1301	47064.7		53604.2		12515.2		15952.3
AKIEHDEGESYSRSLREK	Clo1313_0710			50536.9
AKIELSGVTTTNINLPFITADANGPK	Clo1313_0933		8236.06				452.03		28108.6
AKIGYFESMK	Clo1313_1196	3704.3						2819.25
AKIYYDSDCNLGLLK	Clo1313_0101	312221	394089	138900	117979	37028.8	91726	142757	169416
AKKLESSEYVGR	Clo1313_2554						1657.46
AKLCIEK	Clo1313_1437	4980.23
AKLDAFQGR	Clo1313_0479	1034.51	54965				1240.74
AKLDILSEK	Clo1313_2437		1782.57					13037.8
AKLDMVLGNDITTPVAVK	Clo1313_2884	4.25515e+06	243977	1.80846e+06	141285	701481	28835	2.06727e+06	5506.14
AKLDMVLGNDITTPVAVKEFR	Clo1313_2884	53478	15412.7					9554.74
AKLGAKQNRLEHTIKNLDTAAENLQASESRIRDVDMAQEMMNFTK	Clo1313_2909							25259.6
AKLTWVGR	Clo1313_0277							1095.1
AKLYESIVK	Clo1313_1931	49023.9	35807.3		4722.86				1601.5
AKLYYLR	Clo1313_1457	6906.82	62631.4		38042.6			22915
AKMEIFEGLNEK	Clo1313_1241			627.715
AKMEITQPYVK	Clo1313_0793			3471.46		10060.2		62411
AKMPQGQGIWPAIWMMPEDEPFYGTWPK	Clo1313_0397		3411.31				9823.27
AKNAKIVMSGTNIISR	Clo1313_0276	62173.5		174651		42463
AKNIIAMAIQK	Clo1313_1122	2445.19		1370.62
AKNSTIEAAK	Clo1313_1798	245583	278478	90379.2	191496	16366	109064	158019	807598
AKNYIENIIGNVDYSK	Clo1313_1637		618.32
AKNYLLK	Clo1313_0038	25550.9					17600	2946.47	49958
AKPFEGEFR	Clo1313_1021					1089.69
AKPGAALLAQK	Clo1313_1511	8341.29			42432		67062.9	2332.79	56663.4
AKPNVIK	Clo1313_2627	1410.46
AKQDGYVNVYPIGAISK	Clo1313_1265	154263	28249.5	160233	20016.1	190340	23908.3	166757	126344
AKQEAVDVK	Clo1313_2937	52717.9	138859		4818.8		5932.58	12112.4	45874.7
AKQEAVDVKK	Clo1313_2937		3430.81
AKQIFQWTNK	Clo1313_1665	934.608	3907.85		6883.46	136964			2122.42
AKQILSDAGWKESNGIFYKR	Clo1313_1308	6690.11
AKSEEIIR	Clo1313_1460	5017.68	23302.9	18776.3	6367.98		41357.6	18432.3
AKSEFLANMSHEIR	Clo1313_1415							8242.93
AKTGAVEAEGNATTTRR	Clo1313_0781					1097.89
AKTPSSQATLSLVDLAELK	Clo1313_1980		328.214		1721.31		436.694
AKVAIPTTSK	Clo1313_2290	21313.7	90386.4	3362.64
AKVIFDENR	Clo1313_1353	150721	153296	8199.6	179005	7564.08	69140.1	140145	122386
AKVQYYGTGR	Clo1313_2455	163578	91966.8	17799	132237	23305.3	36951.8	81465.9	139276
AKVVEAEAEVPK	Clo1313_1362	52144.5	133201	355070	217032	50443	188075	272696	492212
AKYEELLQK	Clo1313_0684		1502.92	208.451	5300.38	1782.08	29624.7	68480.2	21083.7
AKYGFDCDTCAVLTSIDEQSPDIAMGVNK	Clo1313_2924					6074.67
AKYPDCAITLSLGEK	Clo1313_2531	47941.4				7861.63			2032.2
AKYTPEDQVNSHFNEIEK	Clo1313_2940	42639	21828.1	22143.7	3620.47	10729.6	1436.56	41691.5
AKYVYLFSEGNASMR	Clo1313_0949					14228.9
ALAAALR	Clo1313_1362	18213.1
ALAAALREGK	Clo1313_1362		5181.42
ALAAEITPTK	Clo1313_1817					4693.96
ALAAEWAK	Clo1313_0815	666944	310684	50758.7	342520	2168.08		401160	878547
ALAAITTNMVK	Clo1313_2544	85306.5				89746.3
ALAAQGADIVILAR	Clo1313_0815	1.42498e+06	2.38116e+06	978003	2.01259e+06	41357.2	1.72768e+06	1.34815e+06	2.54288e+06
ALAAVPVESR	Clo1313_2465	1586.91					1636.03
ALADFFEEAAGK	Clo1313_1183		1123.6
ALAEALFGEENAMIR	Clo1313_2462	373408		94848.2		34419.7		18893.3
ALAEAYGAIGINVTAKEEVDEALNR	Clo1313_0305		173.625	717.712
ALAEDIVR	Clo1313_1888		25561.8						10514.5
ALAELIAVEGR	Clo1313_2925	35690.3	122214	10205.4	12135.7	19185.3	328317	348456	87888.5
ALAENPDAVGVYITRPNYYGICSDIK	Clo1313_2766			652.225		1288.9	7780.1		890.812
ALAFIENIDNPQDKNLFFSGPTGVGK	Clo1313_0049	1036.03		370.788				302.627
ALAGDTSDNIPGVPGIGEK	Clo1313_1334	61286.8	10209.2	35237.5	5422.39		22310.2	12534.2	9097.4
ALAIGGEGGGLSDITSGTGADVNTDDEVPLNHLLLVSR	Clo1313_0291	52413.5	40341.9	50029.7	14255.7	44911.7	20131.6	102240	15259.2
ALALDPDILCFDEPTSALDPELTGEVLK	Clo1313_0795	63239.2	25137.3					43845.6
ALALIFDSNTKK	Clo1313_2005	32805.7				2827.49	21590.6	71255.8
ALAMNPK	Clo1313_2954	56303.6						11085.6
ALANGIKR	Clo1313_0461	84309.3	352512		223544	31470.1		213254	77140.1
ALASIAQK	Clo1313_0072	13368.2
ALATSCNIYFHELGVK	Clo1313_2140	4660.41	10471.8	4696.6	4744.06
ALAVAVYNHYK	Clo1313_0330	97030.3	25322.5	62364		4781.56		49716.4
ALAVDKDR	Clo1313_1785	6808.44
ALCAGACIVNDVWGLQR	Clo1313_0168		46837.2				11494.3	22121.2
ALCAGACIVNDVWGLQRDPDMAEVVSK	Clo1313_0168					1140.42		2101.3	1003.03
ALDAVK	Clo1313_3011		1.21048e+06					278409
ALDAYLK	Clo1313_1495		446.206
ALDCSGLAR	Clo1313_2609	174672	57851.1					51833.6
ALDDIVEVK	Clo1313_0716	1716.7					4418.68		6505.58
ALDDIVEVKVQQILAKEK	Clo1313_0716							188.52
ALDDVALQLK	Clo1313_0078		954.359
ALDEALVRPGR	Clo1313_2950	1495.87		11857.1	13274.9			28716.6	8328.26
ALDEELISGAALDVLEKEPVNCDNPLLGVK	Clo1313_1953	6834.11	43990.8	3432.02	16792.6			58482.2	61793.9
ALDEIR	Clo1313_2462	3423.86
ALDEIRR	Clo1313_2462					8632.07
ALDGVSFSVK	Clo1313_1698						7358.64
ALDIQGYCEK	Clo1313_1498	5447.57		1693.06				58789.2
ALDISYGEVDAIAK	Clo1313_0994		860.081
ALDKELEK	Clo1313_1854	729.529					554.653	3326.3
ALDKFNIK	Clo1313_2556	145247	106893	783.635	4749.65		2659.09	26021.9	2665.67
ALDKLLPMQR	Clo1313_0949	35110.8		1793.42		3630.42		103342
ALDNDQGLNTGGMGTFSPSR	Clo1313_1013	57724.2		197198	33695.6	21896.9	5090.17	1.0363e+06	8863.56
ALDSCKEFK	Clo1313_0221	4489.56	47894.2				2682.9	40001.8
ALDSVKK	Clo1313_1954	24742				1149.94		19478.4	14121.3
ALDSVNLFISNGIYGLLGPNGAGK	Clo1313_1401						13670.7
ALDVFNK	Clo1313_0054					9358.06
ALEAGVSIK	Clo1313_2940	6163.94
ALEAINAK	Clo1313_0450	45262.8	222623	171774	300209	150578	149036	584103	528324
ALEAPNKLILSTTK	Clo1313_2846	9357.16	7520.57	13799.2		2317.51		11949.2
ALEAYVTEGR	Clo1313_1093					2137.76	9040.56		624.109
ALECFSEAIR	Clo1313_2581					1266.22		990.099
ALECQILGDTVK	Clo1313_0165	114841					425805	71328.5
ALEDSGLTPDKIDK	Clo1313_0933	260669	112538	204182			112080	159715	69802.4
ALEEEFGVSAAAPVAVAAVGAAAPGAAAPAAEEK	Clo1313_0312	199494	85458.7	124070	14390.2	57405.4	39433.1	197753	30079.1
ALEEEFGVSAAAPVAVAAVGAAAPGAAAPAAEEKTEFEVILK	Clo1313_0312	4479.54	318900	32114.3	293076	78543.3	99834.8	82601.2	113179
ALEEEFGVSAAAPVAVAAVGAAAPGAAAPAAEEKTEFEVILKSPGADK	Clo1313_0312		3558.74
ALEEIEDEKMK	Clo1313_1571	45240.9
ALEEPFTDFDFDFEPK	Clo1313_0622						47131.8	221831	1825.8
ALEEPVR	Clo1313_0433	2.30168e+06	950126	296144	605687		760777	1.10499e+06	946302
ALEEPVRQIAENAGLEGSVIVEK	Clo1313_0433		54352.8	36958	34354.5		8720.55	3095.88	21968.9
ALEESNYELEGK	contam_sp|P13645|K1CJ_HUMAN							76984.9
ALEFEVDENNMTVK	Clo1313_2017	89371.8				96450.7		3466.54
ALEFGMQYEC	Clo1313_1356	327.742
ALEGPLSVTDEDDEEVSENESSIR	Clo1313_2535			1305.16				18340.4
ALEGPLSVTDEDDEEVSENESSIRK	Clo1313_2535		14499		661.165		521.236	11732.4	866.636
ALEHIEAIEK	Clo1313_0206	126025	73410.6	113425	73141.1	147985	164110	207191	87922.9
ALEHIEAIEKSESGEK	Clo1313_0206		10264.3				4113.62
ALEIFEEVVNKYPNTSYAGYSR	Clo1313_0865	113915		24885.3		191527		11139.9
ALEIGK	Clo1313_1551	46166.8	2320.01		52379.9		36256.9	20684.3	4435.14
ALEIIAAR	Clo1313_2896	6895.45
ALEIIDNSIK	Clo1313_0016	905.179	106335			332.569		3175.97	81637.6
ALEIIEQR	Clo1313_1053				7618.82	11141.2	5925.49	30925
ALEIIYK	Clo1313_1231						3028.53
ALEINGVGYR	Clo1313_0460	389631	403634	173438	434230	824.185	213222	146376	121846
ALEKLDCDIYILPASSPANEIMSYNPDGILLSNGPGDPSELPFVK	Clo1313_2559	7282.69
ALELGYNA	Clo1313_1785	13978.7
ALELPSK	Clo1313_0600	6653.68
ALEMSPPIYALK	Clo1313_1052	370793		411957	3469.89	581922		730561
ALEMVLGQIEK	Clo1313_1163	121621	1747.74	487688	147512	315684	23970.7	518772
ALENELSMGR	Clo1313_1969	185638		1569.85
ALENIAR	Clo1313_1967							146077
ALENNGYEVK	Clo1313_0299		178274	126238	187700		280878	100210	343562
ALENPNDIEAR	Clo1313_1827	21349	136554	4391.51			665143	57965.4
ALEPVIPSEEEFPYTIR	Clo1313_1803	654015	1.14218e+06	564124	530228	54926.2	490665	337633	366750
ALEVAASGGHNCLMIGSPGSGK	Clo1313_1765					3976.36
ALEVGATR	Clo1313_0076	8963.07						4846.66
ALEVIGTPQLIEGGK	Clo1313_1114	14377.7			18449.3		13133.2
ALEVIGTPQLIEGGKK	Clo1313_1114	38714.9	14474	108663	16018.1	44908.8	6872.08	16635	8159.17
ALEYGVK	Clo1313_1011							3838.63
ALFADSTATSIGALLGTSNTTTYVESAAGISVGGR	Clo1313_1007		3689.34		25932		22230.3	5559.94	128827
ALFDFAEK	Clo1313_0400		23765.7			286744	79383.1		1518.22
ALFDFAEKNPK	Clo1313_0400	28892.6	53800.1	506.821	13477.9	216625	82589.9		801.746
ALFDFAQK	Clo1313_1788				3293.78				2355.82
ALFDMTGDEIINEITEANLR	Clo1313_1792	509936	52600	2.04171e+06	212346	250713	26008.7	2.90244e+06	194059
ALFEVADR	Clo1313_1313	3969.24	1517.11				17762.3
ALFFASLAEGK	Clo1313_0636	33452.3	25733.3	9195.9	17603.6	7169.01	113961	135053	139523
ALFIATDR	Clo1313_0897	7373	13948.4		702.804		3620.57	3674.88
ALFIEVSPIPVK	Clo1313_1254	164129	162811	191228	72785.5	397857	277312	251560	152370
ALFVNVNGK	Clo1313_1547		5416.29			23160.4	63578.8
ALFVNVNGKR	Clo1313_1547					4206.62
ALFYENSEPYVR	Clo1313_0805		24467.8		60183.5		23533.7		33898
ALFYR	Clo1313_1194	243480
ALFYRK	Clo1313_1194	52153		156532				559620
ALGAELVLTPGADGMGGAIR	Clo1313_2532	904108	56746.8	1.70112e+06	229557	905560	4771.02	2.23884e+06	58062.5
ALGAELVLTPGADGMGGAIRK	Clo1313_2532	15939.3	7424.64	55607.2		20681.6		73531.4
ALGAEVINTPR	Clo1313_2326	157477	106979	5841.7	2905.77	529146	2802.27	78033.3	111113
ALGAEVINTPREEGMLGAER	Clo1313_2326	41980.9	18326.9	32880		148186		62561
ALGAEVYSVSTDTHYTHK	Clo1313_2638	1.35828e+07	1.07801e+07	2.96123e+07	2.13332e+07	1.04667e+07	1.63196e+07	4.95968e+07	1.64472e+07
ALGCEENILIDTITVDVK	Clo1313_1664						3697.95
ALGFGGEIGEISK	Clo1313_1058	682.814	43850.8		15869.6		45487.9		4570.5
ALGFSFIDEPYPNPEFHIDEVTYVR	Clo1313_0781	564.193		23019.1		23530.2		131807
ALGGGFPIGALCAK	Clo1313_2558	866155	951146	697292	606762	198886	214940	1.53262e+06	314997
ALGILEER	Clo1313_0573				106266			13784.9
ALGILGADAVGMSTVPEVIAAR	Clo1313_1056	21854.6				95433.2	39735.2	442761
ALGLEGLAPSNGAVTVFR	Clo1313_2602	156915	29253.4
ALGLSLAPSED	Clo1313_0474	154353
ALGMSVFPVTSASEAQETVEK	Clo1313_2939	75568	3745.34	68096.6		56600.5		155284
ALGPLSEAPIYIDDTPGLSVAEIR	Clo1313_2929	1730.68	33515.9	26758.4			22307.5	41622.4	24042.4
ALGRDEETR	Clo1313_1717	178036	374635
ALGSLKSPIAGLVNVLNGNIR	Clo1313_0311					4524.41
ALGTVENLKDK	Clo1313_2250	1527.92
ALGYAVDGSVFPNPAFLYDNEGHAAK	Clo1313_2186	17383	425.742			91453.2
ALGYAVDGSVFPNPSFPYDNEGHAAK	Clo1313_2524	2636.53	1279.35
ALGYEK	Clo1313_0014							8673.81
ALGYGTDLEITELFGEDER	Clo1313_0313	327131	47074.3	36614.1	2296.87	1964.13	28493	68239.7	2210.11
ALHDKIDIK	Clo1313_1790	2.78855e+06	1.86167e+06	1.54377e+06	1.68459e+06	497722	209963	2.40654e+06	1.31074e+06
ALHGLTR	Clo1313_0460	24221	99427.4		85714.6	9177.81	7067.49	106089	40963.5
ALHGYYGKPSEELR	Clo1313_1443	14016.8	5485.5
ALHQDVRPLR	Clo1313_2537			3972.16
ALHSGK	Clo1313_1007							2664.79
ALIFDSYYDSYK	Clo1313_0929							9536.03
ALIKGEYGR	Clo1313_1523	470024	350666	471529	488044	26720.9	363349	403390	877921
ALILEALGYK	Clo1313_0713			2428.22		5817.8
ALIMKPAEEQIEK	Clo1313_0673	2.97041e+06	139687	2.72734e+06	135732	2.76553e+06	99576	4.62607e+06	122714
ALINAPSVVLADEPTGNLDSK	Clo1313_1698						2921.65	113279	3810.57
ALINNLDR	Clo1313_0314	9060.67	139211	615.102	67660.8	127362	100614	23304.9
ALINNPK	Clo1313_2338							13319
ALINSISAEK	Clo1313_1581	83178.8	2525.25	3128.54	7039.46	451.906	1706.85	11187.2
ALISVSDK	Clo1313_1012	1321.03	12954.3	43821	270053	106734	220360	175188	8543.57
ALISVSDKTGIVEMAR	Clo1313_1012	103885	2448.32	484565	4696.35	196947	49854.4	587178	15444.5
ALIYYAAATEKHEK	Clo1313_2161			2796.66
ALKDIVINPR	Clo1313_2034				110693	366412	14019.3	67251.6
ALKDVISHTFNR	Clo1313_2150		11344.6				14140.1		266.494
ALKEDLPDILNLQK	Clo1313_1015					1116.21
ALKEENIEVVLVNSNPATIMTDTNIADR	Clo1313_1268			5794.16		64994.9		36846.2
ALKEEVTPNCR	Clo1313_2077	23396.1		25704.2		25022.8		37240.2	63108.6
ALKEIQNLPDNEYK	Clo1313_1673		371.313
ALKEIQNLPDNEYKK	Clo1313_1673	1629.87	1466.72
ALKENVK	Clo1313_1523	86274.4	53423.8	46298.8	38713.7	22916.9	20297	20147.5	149364
ALKQEITK	Clo1313_1861	434112	314012	77938.4	76827.8	19032.6	46007.4	113631	55722.7
ALLAGQNATLEALEYAHYLIVEK	Clo1313_0784					26844.2
ALLAIDNR	Clo1313_0008	683.45	4115.53		3304.8			6450.07
ALLAIDNRELQEKLCDEIIDK	Clo1313_0008			16348.4
ALLEQFFK	Clo1313_1115	105590	240519	231016	514420	197348	261021	447138	111442
ALLFEFGLSK	Clo1313_0188			272.943		222.28
ALLGITK	Clo1313_0314	150902						148074
ALLGVSETHTQR	Clo1313_0804		18714.1	16285.7	19875.8	31584.2	51482	36267.7	40628
ALLHGLFFDPK	Clo1313_0313		12123.8				28700.4
ALLIISDYPEEIASTILR	Clo1313_0294							7162.2
ALLKFDEELRPALK	Clo1313_2455	93863				17915.9		561.174
ALLKFDEELRPALKK	Clo1313_2455				634.683
ALLLESPANPLLK	Clo1313_2325	420190	1.23565e+06	201235	144847	1.09685e+06	356209	1.0548e+06	434535
ALLRPIDK	Clo1313_0640					5975.01		7472.82
ALLVKDYE	Clo1313_2562	9175.08	4527.46
ALLVTGK	Clo1313_0166	396.194						142831
ALLVTVPEFPEVK	Clo1313_1827	486406	239145	2349.67		7.70403e+06	7.78896e+06	219532
ALLVYNPFSGDR	Clo1313_0719	12750.1						56769.5	8971.35
ALLYAINGGK	Clo1313_1717		4725
ALMGANMQR	Clo1313_0313	142500				6077.79		177687
ALMHYEIDAEK	Clo1313_1882	3.17694e+06	129743	913053	103077	541456	72254.2	1.81283e+06	75491.4
ALMSYLVDIYGK	Clo1313_0399					1087.07
ALNAFIESVEEALAK	Clo1313_0246	2.42503e+06	23244	1.10064e+06	8006	123485	33044.4	692938	64007.8
ALNAFIESVEEALAKGDK	Clo1313_0246	287005	3357.57	168180		43241.9	3037.88	168395	371.694
ALNALK	Clo1313_0077							86370.3
ALNALKDGTLYVAQVQNCYDMGYK	Clo1313_0077	11580.5						8809.34
ALNELQSSQADIEALR	Clo1313_1750		5319.57
ALNELQSSQADIEALRK	Clo1313_1750	23667.8	8008.65	5470.91
ALNGDAETVLEGLELK	Clo1313_2777	148528				2333.84	13488.6	23748.5	3681.49
ALNKVNLSVER	Clo1313_2436	7051.74	12605.4					5710.05
ALNPEHPVAR	Clo1313_0673	1.0709e+06	401609	1.19748e+06	586299	1.02053e+06	536740	2.04987e+06	475524
ALNSVLNQTYK	Clo1313_0898	184688	46149	105386	77848.2		93376.6	6309.54	6703.95
ALNTALK	Clo1313_1174	50337.3			42857.5			382778
ALNTGELDVQQISSK	Clo1313_1743	214988	3669	56689.1
ALNVEVAFSDVFSK	Clo1313_0030						628.368	14011.4
ALNYGADGYKK	Clo1313_0860			7292.83			25591.8
ALPAETLAQNLENYCK	Clo1313_0864	20870.8	10641.2	3226.08		200330	178878	4626.28	10597.8
ALPFVSER	Clo1313_2015	249302	358586	149947	419733	121191	312144	437294	209648
ALPGNLDTGVVIVTK	Clo1313_1828	136871	6037.39			3.03436e+06	1.94732e+06	29634.9
ALPGNLDTGVVIVTKDNVDEYYPK	Clo1313_1828					659625	240883
ALPGNLDTGVVIVTKDNVDEYYPKK	Clo1313_1828					877369	310272
ALPHFDYTSDFSK	Clo1313_1305	30793.8	7730.49	20829.2	60591.2	106889	46263.1	12883.5	79418.8
ALPSNTNWNKR	Clo1313_0491					11014.1		2828.63	8937.14
ALPVIK	Clo1313_0126							438.868
ALQAAGLEVSLIK	Clo1313_0472	181854	147994	20004.8	335210	66096.7	254426	219351	338866
ALQANLKPIVVINK	Clo1313_1208	4353.46	19412.5		14012.8		15150.1		17845.3
ALQDLVNHLGR	Clo1313_0479	37388.4	6024.01	4405.26			9790.22
ALQDVLEKAR	Clo1313_2086			4930.2
ALQIWHDVMEK	Clo1313_2433	2815.57		75662		2824.51		151981
ALQSEDVR	Clo1313_2321		1.09883e+06	951.696	2.77404e+06		445802	9.09367e+06	3.04139e+06
ALRDETER	Clo1313_1172	1220.53	10727.1		1390.32		12101.5		2928.21
ALSAGTTTDKIFDMVGR	Clo1313_0837	318514		51337.7		44500.9		55046.4
ALSGNPSPFVMK	Clo1313_1610	23261.2		3297		46629.6		57629.5
ALSGPINIHNDHSDTMGAR	Clo1313_0022	1.34376e+06	197582	62487.9	273664	54243.7	189606	86102.4	236554
ALSIAIK	Clo1313_0168				45240.5
ALSISPSSTLAIDAK	Clo1313_1467	63696.5	60660	161814	171849	60763.7	139188	65617.5	431565
ALSLYMTDSGDVNLTAFEDNSDPK	Clo1313_1109	2998.26		163491		2.19075e+06		909636
ALSNPERPFVAILGGAK	Clo1313_2094	311497	792270	244923	1.95849e+06	69585.5	1.78907e+06	242163	5.96329e+06
ALSVLELSELVK	Clo1313_0312	5.34698e+06	6.04082e+06	1.40382e+06	2.877e+06	465639	2.9655e+06	2.08715e+06	2.34053e+06
ALSVTGHNVANVNTK	Clo1313_2917	17533.3	35012.4
ALTEANGDMEK	Clo1313_1210		99988.5	217455	110674		140219	78745.1
ALTEMASMKPFR	Clo1313_0719	26286.3		1248.53
ALTFIVLNGINEK	Clo1313_0945			16709.2				20606.6
ALTSHPVGGIK	Clo1313_2460	31803.2	15585.8	76837.5	25239.9	4168.51	16797.2	104183	56074.2
ALVASGIK	Clo1313_2560	354561	124346
ALVASTLSPNIELR	Clo1313_0987								12465.9
ALVDCPEDVYVNEVEGEK	Clo1313_1454	439015	561105	136523	656065	2110.26	311807	445569	409052
ALVDSANSFVSTALGDAVFIDGSSQLMCDLHHK	Clo1313_1672	42.4903			25286.5	1.16824e+06
ALVDSIEYK	Clo1313_0102	6141.52	111491		22379.9	985.365	28755	148601
ALVEMGVK	Clo1313_1268	19308.7
ALVIADLK	Clo1313_0544						3947.19
ALVIGEIK	Clo1313_1831			214851	1.00783e+06	139334	20962.8	1.65026e+06	690026
ALVINSGNANACLGEQGYKDAEEMASLAAQLLNCDAK	Clo1313_2150	58871.6		83555.6		43992		112391
ALVNDPAIILADEPTGNLDSYSGEEIMDLFQELNR	Clo1313_2436							6775
ALVNNPSLLIADEPTGNLDPETSWEIMK	Clo1313_2552			11933.5				5089.69
ALVQIAEK	Clo1313_0901	470559	387372	184839	346641	210974	332053	711125	993499
ALVSMGYDVR	Clo1313_0974	25072.7		27464.4		4634.92		18077.4
ALVSRPNLLISDEATSALDPQTTLQILDLLK	Clo1313_2323				38072	48526.7	9556.87	1.01904e+06	6883.52
ALVTSIKR	Clo1313_0587	216325	167523	84012.5	44115			17615.2
ALVVGGGDGGSIR	Clo1313_1530	363486	248135	1794.73	130298	7101.06	399068	298323
ALVVSPNLFVQLQR	Clo1313_2265	1.00429e+06	660240	1.34897e+06	810916	643761	436178	2.06445e+06	724105
ALVVYGHTPQAEVLK	Clo1313_0357		1064.35	15030.7		26809.7	16795.7	7331.8
ALWTAGSGMTAQQLNVDVIANNLSNVNTTAYKK	Clo1313_0208	1409.13
ALYAGEDPMFLAR	Clo1313_1612	2970.19		807.913				20837.8
ALYCADPAAGLITAAALILPSK	Clo1313_2088	62722	301279	123822	368800	51042.9	656926	419135	580697
ALYCADPAAGLITAAALILPSKK	Clo1313_2088								12155.4
ALYDFTHPDR	Clo1313_0901	398526	156239	538321	260669	392713	357503	826658	558063
ALYGGSGEK	Clo1313_2433							14045.6
ALYIESLGNPGINIVDIEAVAK	Clo1313_2534	955383	456356	598643	72585.1	463747	348308	3.13665e+06	376400
ALYLTGWTVGSDER	Clo1313_2180	65798.3	603.04	196635			2944.18	3445.16	15715.2
ALYTGDLDLK	Clo1313_0428	2130.37					4986.95		7919.63
ALYTGDLDLKEAIEVAK	Clo1313_0428			1604.96
ALYTGNMGDGK	Clo1313_2260	1850.42
AMAELEAR	Clo1313_2937	963061
AMALLK	Clo1313_1344	418.112						31130.4
AMAVAR	Clo1313_1362	21626.2				17575.5		78644
AMDEVFTDEKYFTK	Clo1313_2433			19832.4				1732.4
AMDIEGIVNFSK	Clo1313_1013	81426		469871		79126.8	62070.8	1.7219e+06	32442.2
AMEEMVK	Clo1313_0428							71813.1
AMEIIDELETVK	Clo1313_1344	1086.69	42348.2	65752.5	137712	46941.9	19218.7	83820.1
AMEIIDELETVKR	Clo1313_1344			839.277		3791.09		32106.5
AMELLPLGPVVIIDTPGIDDEGTLGEMR	Clo1313_2190	60619.6		122804				105785
AMEMIGK	Clo1313_2125							11056.1
AMEMIGKEDK	Clo1313_2125	5261.18		14525.9		2582.29		55715.1
AMESFECGFGR	Clo1313_1780			72127.1		228.066		46758.7
AMESIDGSMPLDLVSIDITDAADYLGQITGESVSEDVMHEIFSK	Clo1313_3028					15976.4		4187.29
AMFEEGEK	Clo1313_1657			5427.51				11196.8
AMFEEGEKLR	Clo1313_1657	155191		12701.3		5841.05		114400
AMFRK	Clo1313_2456					58932.4
AMGAADLELTDEQR	Clo1313_0829							6838.93
AMGIKPEIIEGAIR	Clo1313_1150	27920.4	7325.47	85373.2	23067.1	28072.9	29150.1	136919	26618.2
AMGSTGTIHMTPEMLQNAMQAIEDYK	Clo1313_2645					20676.9
AMGSTGTIHMTPEMLQNAMQAIEDYKATTDNLK	Clo1313_2645					12357.4
AMGVEEFAPVLDYEVGDNVR	Clo1313_0308	149531	21721.4	2261.02	3157.12	69775.8	7222.21	2252.82
AMGYTDEELERPLIGVVNSR	Clo1313_0304	2.13097e+06	148889	843564	91615.6	331922	9420.42	1.13132e+06
AMIDMHSSTK	Clo1313_2805					943.496
AMLDLALHNGEGPVALK	Clo1313_1504								596.939
AMLEDIAILTGGQVITSDLGLELK	Clo1313_0433			13832.2		4241.05		5658.4
AMLEDIAILTGGQVITSDLGLELKDTTVEQLGR	Clo1313_0433		12646.1	11334.7	200161	6449.13	32214.2	10877.6
AMLELLYATGIR	Clo1313_1547					9594.25
AMMNK	Clo1313_2094							11532.3
AMMSLVDK	Clo1313_2562							2886.73
AMNDIDIVFNLAALK	Clo1313_2905	56732.6		2746.32
AMNEQIK	Clo1313_1820							767.3
AMNNELESCFDMVPFYLR	Clo1313_2448							3983.56
AMNNELESCFDMVPFYLRKSQAEREYEK	Clo1313_2448							1749.08
AMPSEPIEHYLSSPYK	Clo1313_0805	48412.2		45636.4		36778.8		38492.2	1726.89
AMPSEPIEHYLSSPYKVDATIGLPDDNIAK	Clo1313_0805	21158.6		28856.1		21881
AMQDINDASNNISR	Clo1313_1929			2217
AMQQEVGNPDVEESFFEFYR	Clo1313_1964	298568		753137		74177.1		254823
AMSADYSWNNSASK	Clo1313_0974	67683.1	414.867	6534.56		13067.4		52613
AMSLLLR	Clo1313_0193			14515.2	2409.56
AMSLLLRR	Clo1313_0193			704.215
AMSNLGTAEVTEIIINR	Clo1313_2832	37681.9		78814.1	2119.98	17869.7	1827.42	338439	5166.69
AMTPIEMIEFCDSQVNGGIQR	Clo1313_1840			19767.8
AMTTGAVSK	Clo1313_3011	3134	174457	83870.2	2524.67	212937	46610.2	723976	21094
AMTTTEDPALACRPFDAER	Clo1313_1285	298486	5509.08	387187	28412.4	14256	27798.5	537806	10633.5
AMVEAESYK	Clo1313_0673			356931		1408.71		14443.6
AMVIHGMDGMDEITTTTSTK	Clo1313_1346	70739		300383		328221		422391
AMVMVPCCQQEILK	Clo1313_0713			101873		22024.3		10397.3
AMVNEYNIK	Clo1313_2435			105270				185893
AMVNEYNIKDVK	Clo1313_2435	34422.6		12501.3		5844.75		46108.7
AMVQEMR	Clo1313_1362	122811		140829		137404		303093
AMVVADMPFLSYHTGK	Clo1313_1316	33456.4		262085		151969		453830
AMVVADMPFLSYHTGKNDSVRNAGR	Clo1313_1316					1146.61
AMVVDMNDK	Clo1313_0105	964.486
AMVVDMNDKYAVVVNKEGQYIKIK	Clo1313_0105					1335.62
AMYADENTLEK	Clo1313_0266			69377.6				275421
ANAAILDR	Clo1313_1212	1.28937e+06	768455	229449	268874	235320	814197	151514	482801
ANAIPTTVSIEAPDEIINSIGEVR	Clo1313_1096	44636.9	16786	39065.8	25659.7	27726.6	9695.31	40407.6	31397.9
ANAVESLNDANSELR	Clo1313_0039	1.00462e+06	578852	394481	264329	7631.72	425417	538325	258742
ANCDMLTK	Clo1313_1960			189631			2458.85	63248.3
ANDENGITEAHPTKPASPYAGSK	Clo1313_2893	241465	49320.2	30614.2		13064.7		10087.3	1273.98
ANDETKKLTDALNTSISILKETIK	Clo1313_0587							5964.93
ANDLSITQNVVEIK	Clo1313_0939	39299.6		536.2		18188.2	163021	16661.8	4117.86
ANDLSITQNVVEIKSELEK	Clo1313_0939						10379.4
ANEEGITVK	Clo1313_2723		1248.46	1301.04	122130		214458	124477	126934
ANELNSTEENEK	Clo1313_1301				83741.2			42126.4	396.998
ANGMIGDK	Clo1313_1115					494.762		1245.16
ANGMIGDKVVYK	Clo1313_1115	17764.8		7380.84		13742.1
ANGPQQIFVEK	Clo1313_1599					9928.61		955.784
ANGPQQIFVEKK	Clo1313_1599	5301.97	8615.29	1622.76	7187.69	4061.29	11549.8	824.565
ANHCGYDVK	Clo1313_1832			204887	571318	402929	305647	1.16228e+06	947412
ANHLLEAIQYR	Clo1313_1765					3106.17
ANIGDIIIATIR	Clo1313_0629			50881.7	309431	1.2735e+06	866209	392886	1.33233e+06
ANILFTLGR	Clo1313_1785	515.94
ANILSTLTSK	Clo1313_1794	8296.39						4673.65	4216.02
ANIPLEFER	Clo1313_1362	921201	958764	833027	1.34961e+06	620116	928616	758519	2.80454e+06
ANIQVNGKPVSVR	Clo1313_0684	56265.6	34984.8	64676.1	42752.5	121837	76333.9	28813.9	42320.7
ANISESPEMLEALIR	Clo1313_0406		203578
ANIYIDFAK	Clo1313_1659				1856.77	2007.56	4468.21
ANIYIDFAKK	Clo1313_1659					6222.8
ANKEDTVKFDREAAKK	Clo1313_2827	1213.26
ANKFTGEQK	Clo1313_2765		1592.09
ANKGEDMEALALELSEDSGVEGNK	Clo1313_0221			29371.8
ANKPCIIFIDEFDGIGEK	Clo1313_2950	2260.21		11178.1				1685.52
ANLPQREPEFLK	Clo1313_1434	118583	47915.1	65564	43918.7	37882.3	37933.2	67898.6	24121.6
ANLSWMTAGPTGSGK	Clo1313_1599	140285						35586.3
ANLYAMK	Clo1313_1606	217697
ANLYAMKK	Clo1313_1606	6283.23
ANMIAVLVKR	Clo1313_0293							955.865
ANNEDLQR	Clo1313_1967		1774.43		2708.8		10731.8	8530.63	2267.68
ANNENIVKEDIDYSTFK	Clo1313_2150	887.789	128966	138393	213933		165776	264112	194290
ANNEVAPFTVR	Clo1313_1666		44659.4		100393	4289.37		2674.56
ANNFLELLDILNNMTLK	Clo1313_1001	184.16
ANNIITVANPCPANGYTK	Clo1313_2845	6897.02					916.446
ANNIITVANPCPANGYTKR	Clo1313_2845	3725.57						5821.48
ANNLEAVLIAK	Clo1313_2532	476014	758414	605931	783972	242723	319629	1.0651e+06	780576
ANPDYAMK	Clo1313_0102			44851.5				55975.4
ANPIATILSVAMMMK	Clo1313_2882							1194.21
ANSFNTSFPATVEEVVSANLFPK	Clo1313_1689		6687.19		6786.35		3954.95		9373.94
ANSIAEAINR	Clo1313_1305			1617.28		396.918			82013.6
ANSKEWSEDEKKK	Clo1313_2005							411.123
ANSLEGLK	Clo1313_1226		84822.5	12837.8	55407.7	12440.7	54660.9	9872.16	110945
ANTATLTASGVK	Clo1313_0863	10294.3	80601.2	36710.9	82211.3	111233	133863	30028.5	83031.9
ANTATLTASGVKK	Clo1313_0863	19417.3	25937.9	6172.79		12133.8		7646.21	3752.82
ANTPWEWHAR	Clo1313_2902	73037.8		5457.4		2692.28		4590.8
ANTYFNDAIIGNSGMLVCLTR	Clo1313_2460	7066.02
ANVALVPGSGFGTDIHVR	Clo1313_1467	462223	523656	939569	709779	794191	411651	1.89062e+06	796603
ANVIADNLIAEGK	Clo1313_2635	4289.74	82283.2	8972.28	20537.4	213099	145065	19517.9	30027.1
ANVILVK	Clo1313_0288							11364.7
ANVLESSR	Clo1313_2882		245366	47389.6	6427.67	119242	168560	182834	42897.3
ANVLFGPQSGGVK	Clo1313_2332	17198	10073	41835.1		40206		215599	5685.19
ANVLIFPDLDAGNIAYK	Clo1313_1185	1.4206e+06	401663				5373.53
ANVLNDSSQASEQNEHSSGR	Clo1313_1411	76224.6	32430.1
ANVLNEALNQAR	Clo1313_1797	1.24045e+07	1.70643e+07	1.32024e+07	2.46978e+07	4.68009e+06	9.74905e+06	1.6276e+07	1.82149e+07
ANVNDFVNPELK	Clo1313_1816	4000.43	131018	2457.09
ANVSEIMNIIGDVDNKR	Clo1313_0218	313924	10414.8	338833	2376.69	110934	63514.5	485079	12398.6
ANVSPQFLEMVK	Clo1313_2137	66595.5	31177.1	59512.8		42864.4		56092.7
ANYTSYENIDK	Clo1313_0319		184491	57581.6	295726		219850	263158	207411
ANYTSYENIDKAPEER	Clo1313_0319	1.59091e+07	1.01501e+07	8.23342e+06	8.84423e+06	4593.82	6.93671e+06	6.05407e+06	7.39567e+06
ANYTSYENIDKAPEERER	Clo1313_0319	84307.2	652879		254532		144257		130438
ANYVHMK	Clo1313_2938			3520.99				19210.9
APADLIYELPEGEYCNVHGPAEVPDLEDIVDDIPDIPNENSSNR	Clo1313_2433			7828.4
APAPK	Clo1313_0304	4611.94
APAVATGAK	Clo1313_1355	204198	95928.7		56449.2	5824.72	72645.1	150080	246839
APAVATGAKR	Clo1313_1355				1836.02
APDAIEIDTTDLTIEQVVNK	Clo1313_1512	4910.14	11854.7	27081.1			14195.7	16021.5	11332
APDFELPDQNGK	Clo1313_2228	49297.8	26453.9	73434.3	57487.8		81707.1	164214	72195
APDFELPDQNGKMHK	Clo1313_2228							1220.3
APDFPTGGQLIYNER	Clo1313_1921	45277.3		989.919		572.885
APDGEFR	Clo1313_0216							5175.1
APDKPTYVEIYFEK	Clo1313_2054	40790.6	10383.7	36711.4				6186.58	1787.35
APEDDIVEYFCR	Clo1313_2189					655.827
APEEIELMKK	Clo1313_2606			121.047
APEITAALKR	Clo1313_0163	8501.29		2379.57		5778.74
APETFTTK	Clo1313_0673	130414		80375.3	67155.6	19092.3		35529.6	71865
APETFTTKK	Clo1313_0673			69150.1	17277.2	51441.2		162570	127227
APFDKER	Clo1313_1020							2076.51
APFEAK	Clo1313_1760	21872.1
APGFGDRR	Clo1313_0433	2155.83		141013	246493	26460.2		181466
APGSPPFTLIDYFPK	Clo1313_1918	25354.9	2431.88	66812.1	1473.63	17115.5		14232.6
APGYAVNEIDKIVER	Clo1313_2856		4953.17	13854.7	118292	58028.8	38457		27216.1
APHLAIDGELQVDAAIVPEVAK	Clo1313_1185	229.337	2341.69
APHLQGK	Clo1313_1264	1683.45							15357.2
APIDWLK	Clo1313_2017							3721.09
APILILDEATSSVDTR	Clo1313_2261		5720.56		6740.66
APIMSISDGLDELNSLVDEYEK	Clo1313_0496	27237				6603.56		35987.6
APISENPAVSLPSR	Clo1313_2048	189003	77183						95568.4
APIVVNSIK	Clo1313_1944		47910.9		49285.4		157761	254006
APIVVNSIKPFVK	Clo1313_1944	19312.8	5063.06	122826		32235.7	43655.3	42652.5	30035.3
APKVDEALINQIK	Clo1313_2637		67019.5		43461.9				38666.3
APLLNK	Clo1313_1797	747158			211475	294680	168402	84946.7
APMCGVPFHSADSYIAK	Clo1313_1445	66294.9				10797		62253.5
APMPGTILDIR	Clo1313_1524	933108	116021	602078	193439	194752		708414	12423.9
APNLKEIVIEFNGEVASK	Clo1313_3011	715799	1.95072e+06	130213	658404	263677	1.4242e+06	1.32693e+06	984120
APNLKEIVIEFNGEVASKADEK	Clo1313_3011		51183.4						12421
APQAAGK	Clo1313_1342	404.658
APQFSKR	Clo1313_2455		1333.09
APQQVEEFINEYVKPVLEK	Clo1313_1481	309068	20980.1	200938	5406.74	927.439	170696	339551	15608.3
APSAILMEVQR	Clo1313_1089	148663	4311.07	132038	54054.9	90297.5		229855
APSGCNSQCWK	Clo1313_0588	1330.25		32026.9	41504.4			17265.6
APTKDGTSYK	Clo1313_2747								4846.64
APTKDGTSYKDLFLELYGK	Clo1313_2747					2477.95
APTPSAAAELVMPEK	Clo1313_1388							5550.84
APTPSAAAELVMPEKVTIINR	Clo1313_1388							2098.37
APTSGVGFMFTVPIGK	Clo1313_0848	127216				134185	5244.8	197690
APTVAGLSGDDYSEIK	Clo1313_1114	153361	21123.2	138471	12116.2		25283	202746
APTVAGLSGDDYSEIKLK	Clo1313_1114		949.136			3400.75
APVFK	Clo1313_0638				26217.9			107396
APVFSFSK	Clo1313_2560	265757	61544.4	21918.8	9449.85	119.464		49562.3
APVIINTK	Clo1313_2913	198508	29195.5				3947.47	14628.4
APVMQVLMENCIVSK	Clo1313_0539	515339		425565		166979	1608.28	629883
APVVSAAILCGADADDIQK	Clo1313_1390							12542
APVVVK	Clo1313_0636	164028						144967
APYELSR	Clo1313_2272	33994.6			1119.84				11908.2
APYKPLELGSLVR	Clo1313_1180						150167		188320
APYVGK	Clo1313_0102	152158
AQAEANIK	Clo1313_2937		5268.42	3194.67		544.943
AQAEANIKR	Clo1313_2937	192284	127657	16942.8	12771.1	12110.8	15900.1	146632	43641.5
AQALNEGKPEK	Clo1313_1210	3.20253e+06	1.54466e+06	240248	2.56359e+06	873231	1.90365e+06	2.2284e+06	2.04051e+06
AQEICISEGASR	Clo1313_2773						104170
AQEKAEMILQEAK	Clo1313_1861	52497.6	3524.63	6852.52
AQENITYEMAK	Clo1313_1491	132946		397093	87223.4	79330.9	215954	372085	120739
AQFLAMR	Clo1313_0101	1.52355e+06	73743	698556	69126.6	204053	48496.8	1.44186e+06	37344
AQGYDGAVLGAR	Clo1313_1082	9739.11	104729	12900.7	8610.19			76878.8	2904.44
AQGYLFSKPLPAEEIEK	Clo1313_1813	70140.8	71103.8	20124.9				37447.7	49608.1
AQHGIFGYTEASER	Clo1313_0389	42176.7	3085.55			19112.8	2696.96	2133.5
AQIINTLEEMQER	Clo1313_0511	108828		94472.1	16300.4			12347
AQKETSDAVAFIAR	Clo1313_1201		9184.06		12549
AQKNEITEYHIYSK	Clo1313_2276	7343.77	4289.88		3395.29	2344.26		5571.32	5828.74
AQKPGEPAWDSPWGK	Clo1313_2723	241323	140941	192852	194569	47360.8	153109	279985	127007
AQLALDIFCYGVR	Clo1313_1186	378366	25879
AQLENLTVPNEVIVFIADK	Clo1313_0001	32213.8		85821.2			24716.6	495730	39799.4
AQLFKPDIMTLDITMPDMDGLTAVK	Clo1313_0937			8956.29
AQLYDMPLEELKK	Clo1313_0613			1557.26		209746	3727.32	9605.67
AQNYADAALGR	Clo1313_2059	2678.71	10754				18571.3
AQPFTESELPK	Clo1313_1994	118652	24249.5
AQQHIDAMK	Clo1313_1954	229061		83355.4		56134		334121
AQQHIDAMKEAILK	Clo1313_1954		1280.04	3124.55				13049.3
AQQILDEDHYGLEK	Clo1313_2149	1305.65	1360.85	23221.4	7226.81			2855.38	3589.84
AQQLGAK	Clo1313_1847	2180.49			1796.88			28924.5	6064.48
AQQTINTISPNELLAYALR	Clo1313_0572				537891	93332.5	270571		270893
AQSAIWDDSNHPNNWK	Clo1313_1701			10971.9	26897.6	237276	69847.8	8108.67	96879.8
AQSAIWDDSNHPNNWKR	Clo1313_1701				51458.2	2685.92	43741		45641.3
AQSIYSFQGASMTQFEK	Clo1313_2004	1266.21						4740.56
AQSYTFAYDAMDR	Clo1313_0880					1105.6		3176.68
AQTDLEADITYLGTVGYSENINK	Clo1313_2584					2457.56
AQTTHAEINLLIPEMTYR	Clo1313_2788	443644	16807.5	1.79191e+06	155356	3.48163e+06	1.10995e+06	5.17034e+06	325065
AQTVLQR	Clo1313_1142	3928.4
AQVDEAVASLIEQAPLVQAYLMDQVK	Clo1313_1475	38887.8		29751		1872.42		140548
AQVDEAVASLIEQAPLVQAYLMDQVKDK	Clo1313_1475							1799.34
AQVDYALGSTGR	Clo1313_1477				6374.5	944.893	167260
AQVRQAAAKGGN	Clo1313_0061			1194.79
AQVVAPLMEFR	Clo1313_2695	32286.9
AQYEEDKPVGNDILEGIITLPVILGLK	Clo1313_1673	294.198						1430.26
AQYGEAAGHPR	Clo1313_1097	228.102		1452.65					10097.1
AQYILPLSK	Clo1313_2468	507223	1.41343e+06	231018	1.80484e+06	1.34563e+06	3.1924e+06	1.11533e+06	2.73679e+06
AQYVAVTDDEAVEAFEYLSR	Clo1313_0836		5301.06
ARAEALLSGEQGFEVK	Clo1313_0039	46695	7039.74	21385.1		33598.3	15799.5	27752	8050.85
ARDEYFEK	Clo1313_1542	33347.1	184356	129346	131481	8115.96	33240.7	452219	174006
ARDINDEMK	Clo1313_1879	1.42481e+06		686319		39162.9		1.35766e+06	438.28
ARDMAAELVNR	Clo1313_2747			25717.5	983.701	719657	74802.4	19113.6	26524.3
ARDPISAK	Clo1313_0218	99761.3	179565	15325.6	61732.8	25990.6	142340	229246	104818
AREEGPAKPK	Clo1313_2179	4226.5		1442.35			5054.37	5534.02	3191.31
AREEIMQQTGAFIQNR	Clo1313_1304	180777		156912		38953.6		135991
AREMNMNVFK	Clo1313_1730			1138.82				4144.73
ARETASFIK	Clo1313_1056	2706.28
ARIEAAQR	Clo1313_0039	125525	269402	3182.24	43402.6	8635.48	157328	151883	145943
ARIENENLIK	Clo1313_2088			312.547			9844.27	2541.41
ARMTVDK	Clo1313_0133								1356.56
ARMTVDKDYKIAEIDK	Clo1313_0133			434.893
ARNEAWVIK	Clo1313_2169	2.86927e+06	1.63064e+06	2.69882e+06	2.13225e+06	1.65266e+06	1.76716e+06	4.27341e+06	1.8056e+06
ARNEELEK	Clo1313_1138	633.122	2520.69		1003.31		1474.69	798.359	1623.26
ARNHVHVIR	Clo1313_2127							182.666
ARPGDRIEVPVSLK	Clo1313_0630				3306.93		5899.31		12258.7
ARPGDVIK	Clo1313_2554	4.52854e+06	2.18873e+06	2.46073e+06	2.37557e+06	430150	1.69513e+06	2.79215e+06	1.10832e+06
ARTEEEGFREILPLQNEIASR	Clo1313_1161			522.222	7218.81	376.758	646.98	6867.82	2621.17
ARYSQNEVTEADR	Clo1313_1157			2787.17				4654.35
ARYTGASCR	Clo1313_0473	7544.21							7301.47
ASAAALIYDDFETGLNGWGPR	Clo1313_2530							9459.04
ASADEASAAIQEIVASIQQVAGNAESTAK	Clo1313_0407	28247.5	39527.2					2144.54
ASAGAIEYVPVAR	Clo1313_2718			905.157			3064.03
ASAHFK	Clo1313_2095	158945			788298			199814
ASAHFKGGAK	Clo1313_2095		3134.4		28571.8		18648.3	2528.51	14340
ASALCGLGQTAPNPILSTLR	Clo1313_1882	4.13341e+06	6.6359e+06	1.72334e+06	4.70104e+06	1.17512e+06	5.49958e+06	6.50037e+06	6.28969e+06
ASALEFYKPIVLK	Clo1313_1157		9789.82	6332.6	13070			17521.4
ASALGAEKDEVIVR	Clo1313_2606	132120	61634.4	142649	241925	40002.1	209490	185164	290742
ASALMTEAYAATSFIVPEILTIPEEK	Clo1313_0082							2921.64
ASAQELIGEGEAEYIR	Clo1313_1558		115614	104873	3122.27	50655.6		39485.1	241404
ASASQFGADELEIPTFLR	Clo1313_1775	19426.3	150946	123096	273418	100852	7058.38	9827.64	449854
ASASQFGADELEIPTFLRR	Clo1313_1775	105558	48430.4	50619.4	33019.5	37810.8	7346.01	27787.7	4841.4
ASDIHIEPQEDCVLIR	Clo1313_1106	646729	646754	477678	355933	142254	11138.2	516451	97712
ASDIHLTVGR	Clo1313_1972	32711.8	73555.1
ASDKFIIK	Clo1313_0448	680307	117590	55980.1	104888	50665.9		226062	11928.4
ASDKFIIKR	Clo1313_0448	317327		35346.4	175114	43003.4	16126	142731	41462.7
ASDPQVQR	Clo1313_2433						5903.33	1371.77	3544.55
ASEHPLGVAIYEK	Clo1313_2540	5258.94	3042.62		21872.8	31824.3	136077
ASEIKPIYGTER	Clo1313_0138	28994.3
ASELIK	Clo1313_1793		229297					398097
ASELNVPQNPVYESIILTNK	Clo1313_0600	28623.2
ASENELK	Clo1313_2095				1482.77
ASENELKGILGYTEDAVVSSDFIGDPR	Clo1313_2095		52377		13968		4848.72		20741.4
ASEPDFWNDTENSQK	Clo1313_1856			40929.1				20140.2
ASEPDFWNDTENSQKILQKIK	Clo1313_1856	4665.97
ASEPGIGFDAYNEK	Clo1313_0433	1.8809e+06	664142	1.8388e+06	1.63143e+06		1.0065e+06	1.92243e+06	1.20286e+06
ASEQDAVKQEQAVSTAEGSMAK	Clo1313_2832							34295.1
ASEVEIDR	Clo1313_1345							5591.11
ASEVEIDRECLIFR	Clo1313_1345			36598.6	8815.12	3777.86	8412.66	28062.6	13031.4
ASFANPFAGNVPR	Clo1313_2264	3.75212e+06	5.11855e+06	3.40739e+06	7.63866e+06	1.97264e+06	3.74047e+06	1.1778e+07	5.94001e+06
ASFDNVMLEK	Clo1313_2806	48756.1				591.627		42024.5
ASFDNVMLEKVDNVPDGAR	Clo1313_2806	2396.26
ASFDNVTMEEVETIPEGAPR	Clo1313_0647	456468		834400	43086.9	395672		3.25862e+06
ASGANILLTEDPEEAIKDADVVYTDTWVSMGQESEK	Clo1313_2561			13340.4				15565.4
ASGANILLTEDPEEAIKDADVVYTDTWVSMGQESEKEER	Clo1313_2561	67756.3
ASGAPLVSLAAVIQHNTSGFGSPK	Clo1313_2775		9944.41		5518.3		16045.8	10088.7	10680.1
ASGCGNFIK	Clo1313_1631	142658			41548.4			40284.4
ASGDLEITSEK	Clo1313_1884	924.659
ASGDLEITSEKLVGTTVK	Clo1313_1884			2227.05
ASGDNRAEEAAR	Clo1313_1775		1145.61					680.255	2895.62
ASGGIPANTLITK	Clo1313_1601	39036.4	73259.6		103328	34086.3	66111.1	92187.9	65540.2
ASGIDIDMR	Clo1313_0571			688.829		2430.27		22671
ASGINLSDEILNK	Clo1313_1946		758.331	588.573	1144.42	60181	4238.46	3390.06	17210.6
ASGINLSDEILNKIEAILQ	Clo1313_1946			45045.4		2211.74	2141.78	204070
ASGINPVDCDLAWWLK	Clo1313_2058	72911.5	619.648	5556.5		4235.64		24951.1
ASGISCVIAETFAR	Clo1313_2883	4.98838e+06	1.75158e+06	2.39173e+06	1.35893e+06	1.04894e+06	733586	1.5622e+06	929577
ASGSHLDFDLDLAVKK	Clo1313_2606								4383.91
ASGVDISLVEK	Clo1313_0684					7073.22
ASGVDISLVEKR	Clo1313_0684	20864.6	24841.2	4222.88		12246.5	1783.47	3033.58	1378.78
ASGWNIANDESYAR	Clo1313_1916	105659	6503.93	6495.02		33360.9	8488.66	3004.68	8878.36
ASHFENVK	Clo1313_1848		4359.65		3783.87		13337	51116.6	35642.4
ASHFENVKK	Clo1313_1848	10775.5	4006.1	24238.4	75229.1	18056.7	82411.3	174109	100955
ASILVMGPLLAR	Clo1313_0202		4070.76	75294.2	1593.29	8366.3		62198.1
ASIMHIDIDPAEIGK	Clo1313_0305	910772	3784.69	699652		246923		153695
ASIPEISVSGVSLKPFVTPEK	Clo1313_2643		9100.67		1280.63	39349.6	72725.1	9854.62	6507.87
ASIPFEVVER	Clo1313_0648		20487.2		27125.3			50124.6	22112.6
ASIPFEVVERR	Clo1313_0648					1547.1
ASKEENLEATPVAEVTDDRR	Clo1313_1683	47236.9	14860.8				74849.5	1203.22	40825.1
ASKLLEEKIGEELK	Clo1313_1407	1355.26	857.335
ASLDTAKNLINK	Clo1313_3010								25232.1
ASLEGNDFFAK	Clo1313_1882	640946	1.00606e+06	167930	2.83621e+06	243139	539165	498657	721476
ASLFGSSQQIIIENSR	Clo1313_2128		16734.5	10916.1	6767.92	8388.83	86611.3	10314.5	136190
ASLITSDEK	Clo1313_0002							6687.26
ASLITSDEKKYPVK	Clo1313_0002	3568.81	23171	19531.7	2331.02	7634.04	1201.21	31880.5	4272.64
ASLKGEK	Clo1313_1558		2412.15
ASLLDLAR	Clo1313_1628		3016.61				1708.04	8992.67	10477.1
ASLNNPNVEVVGINDPFIDLEYMQYMLK	Clo1313_2095	1.14693e+06		4.57311e+06	3528.46	1.1721e+06	947.925	4.03956e+06
ASLTPMMQQYLEIK	Clo1313_1445							4433.92
ASNAGGVATSGLEMCQNSMR	Clo1313_1847	223238		370812		644047		2.77314e+06
ASNVPVK	Clo1313_1724		6158.34
ASNYQFAANISEWK	Clo1313_1867	324601	2220.02	55813.6		91007	2900.43	3607.29
ASNYQFAANISEWKK	Clo1313_1867	16591	308.384	8768.64		30622.8	3178.19	1994.52
ASQAWALYNER	Clo1313_1159	62093.3	155866	29391.1	82377.4		39319.7	168868	102475
ASQGLADYIK	Clo1313_0993		23408.9		38056.3	9369.23	4150.72		8890.45
ASQGSNVQEPVPQEK	Clo1313_2724						9080.84	3983.2
ASQVGFDWK	Clo1313_0245	784.43	5057.87	7222.49	2895.81		3600.83	11279.7	3212.66
ASQVGFDWKDIDSVFEK	Clo1313_0245							3434.81
ASSEGIVEPANFNCPGQITVAGEVK	Clo1313_1282	292388	79352.2	489760	368467	159365	131216	218651	234338
ASSEVVESVLQK	Clo1313_0612						12728.3
ASSHFSLDNMCK	Clo1313_0293	28287.6		10171.2				37335.4
ASSNGILEGYPDGSFKPNNPITR	Clo1313_0675	39463.6	406.897	30499.1	4376.25	67001	75927.3	44318.3	22618.8
ASSVPMTIAAYR	Clo1313_1218	22214.9		52698
ASTEIITIIENSIR	Clo1313_0889						4006.38
ASTENVAGIVGMGK	Clo1313_1503	449986	10431.2	545517	113304	178999	36034.1	863941	4342.74
ASTENVAGIVGMGKAIELAVENMEENNKK	Clo1313_1503				651.05
ASTGFANDLRK	Clo1313_2262							4262.96
ASTIFPQMVGHTIAVHDGR	Clo1313_0449							9923.85
ASVGFVTK	Clo1313_1825	6641.86
ASVGIIGATGYVGTEIVR	Clo1313_2555		5807.22
ASVINAGDGMNEHPTQALLDMFTIIEK	Clo1313_1264			4929.29		16859.9		38954.9
ASVKPGEHDLIK	Clo1313_1916	7323.82		12231.4		10343.1	6404.11	10048.4
ASVNLATER	Clo1313_2540					380.179
ASYGYLYGHPGK	Clo1313_2854	28363.1	11148.2	2151.29
ASYSSLNGADKEADNIVSIK	Clo1313_2974						3478.81
ASYSSLNGADKEADNIVSIKK	Clo1313_2974					131724	10158.7
ATAATHIGYVR	Clo1313_1592	26742.2
ATACILENYQQEDGSVVVPK	Clo1313_0011	58071.4	188971	106902	249602	58408.4	279459	171025	313784
ATAEVMRPSVGYWK	Clo1313_0513			35313.1
ATANVVIPEGLGSANYTLK	Clo1313_2176						8214.09
ATAQSVVDGLSLPGFMK	Clo1313_0303	122326
ATAYTASYEDTGKTPDHPEFGITYTGIR	Clo1313_2751						14213.6
ATDFQSAIMSIGPAK	Clo1313_2950			31298.3				228231
ATEAEKAGADYVGAEELVSK	Clo1313_0310		1781.71
ATEAVSENTK	Clo1313_2155		9793.76				12049.1		26376.6
ATEAVSENTKK	Clo1313_2155	550.266	7183.38			1583.73	8170.25		38150.9
ATEDLQQAFYSVSAK	Clo1313_0933	131469	7622.37	62117.8	106570	115906	4645.75	8773.51	7072.17
ATEGTVIER	Clo1313_0745				41274.2		69017	25441.7	84347.7
ATEILVK	Clo1313_1631		39741.3					7101.21
ATENIDAIIEMIK	Clo1313_2723	18032.5		14376.1		55160.9		264687
ATENIDAIIEMIKK	Clo1313_2723	391.78		6206.89		1508.01		3318.49
ATENVGTVVQIIGPVIDIR	Clo1313_0195		21976.7	926.278			651.776	24376.5	31814.3
ATEQWFASIEGFR	Clo1313_1434	54775.7		62809.6		203.562		53248.1
ATEQWFASIEGFRK	Clo1313_1434	17867.9		6385.51				3244.33
ATFCMK	Clo1313_1790							247108
ATFLPISSVK	Clo1313_1290	5059.28
ATFMVVGQR	Clo1313_0521					4017.98
ATFPEINESTIPK	Clo1313_2846		26242.2
ATGDLSSETENMLKK	Clo1313_0193			76306.3
ATGEEVYHTYFK	Clo1313_1604					13366.8	4618
ATGEVMAIGR	Clo1313_2560	340570						161769
ATGEVMAISSSFEGALMK	Clo1313_1268	4109.22		33840.8		20007.3		20678.1
ATGGLAETVIDIDKDKK	Clo1313_0974	138118	47046.2	7459.93	11177.8		559.489	15892.7	10368.9
ATGHTFNGSYTVTK	Clo1313_2479			3889.52	7522.87	7555.1		5697.76	5379.05
ATGLENFQIDIGQVEFFK	Clo1313_0421							1430.9
ATGQAVHAEVILR	Clo1313_0400	4024.34	23263.3			211915	200449
ATGSICGIK	Clo1313_0426	155267			205200		366626		1079.29
ATGSICGIKLPEGLR	Clo1313_0426	69295.1	10476	44266.8	104119	20569.6	15661.9	53760.7	10835.5
ATGTSVITAR	Clo1313_2176					59754.6	9284.85
ATGVNADTSVQAELLQEVSSLLAELKK	Clo1313_1357			62101.7		38454.6		121503
ATGYPIAK	Clo1313_1268	3739.87				3168.62
ATGYPIAR	Clo1313_2560	158879	176623
ATIASEPK	Clo1313_0510			825.453				65367.1
ATIGIGGAYSSLR	Clo1313_0715	135735	187579	284534	103799	12721.8	60029.7	304681	168705
ATIGNFVK	Clo1313_2130	50616.4	32501.9		252630			52335.4	72965
ATIGQVGNIDHENVSIGK	Clo1313_0448	1.42929e+06	442733	296634	127384	192711	34624.1	329725	102593
ATILFK	Clo1313_0328	104638						42720.6
ATILFKK	Clo1313_0328	136199	137952	40012.7	70498.7	22545.8	39778	83205.6	29171.2
ATILGHIQR	Clo1313_0997	334317	5616.81	804224	1.52542e+06	447818	501494	1.5754e+06	638659
ATIMTPTEYVGNIMELAQER	Clo1313_0929	2059.33		7517.52				3024.13
ATINVILGIIAK	Clo1313_0614		59412.7						100785
ATITNMGAELGATTSIFPSDEVTR	Clo1313_0709	415597	10084.9	496233	8660.35	168138	22472.9	665466	23454.7
ATIVPGVDNESGVDRTEYCLR	Clo1313_1897					2672.4	4730.05
ATKIEIEGASTPDYPLQK	Clo1313_2162		29455.8				6024.87
ATKPWVK	Clo1313_2178					3549.24		1231
ATLAMDGNVDMQGLSVK	Clo1313_2586	270249		44812.6		5291.04		10145.3
ATLDGLATALAAER	Clo1313_0035	168597	360818	5930.22	180020	43752.5	128428	132282	54002.3
ATLDNAGIDTSNLLMSSSEMTTLAFVHLNEK	Clo1313_1832			37561.6	46253.8	43786.2		241100
ATLDNAGIDTSNLLMSSSEMTTLAFVHLNEKGDR	Clo1313_1832				157670	235008
ATLEDAEAIQSITK	Clo1313_2562	40726.3	220756	33657.5				2010.6	98191.4
ATLEEIDQESFNNIVK	Clo1313_1518		1626.44	5973.02	5199.73	5159.2	4205.93	7940.87	5890.3
ATLHNMDYIK	Clo1313_1178	3620.03		32057.2		2657.32		71561.9
ATLHNMDYIKEK	Clo1313_1178			8466.06				4228.58
ATLKVIVTPEELQVVDVK	Clo1313_3011								2250.63
ATLVDGSYHSVDSSEMAFK	Clo1313_2467			2372.52		23294.3		99093
ATMDVAQMVLVGK	Clo1313_2556							15934.7
ATMKELYK	Clo1313_0415	61380.2	5712.72	47053.6	22842.7	18141.8		153037	13079.7
ATMPVEDQVIVLYMATNK	Clo1313_0193	1016.71
ATMSSCGAASISELQK	Clo1313_1542	388211		358059		42994.8	3821.41	190302
ATMVIRPPDGGR	Clo1313_1724	274399		315555		7282.3		346644
ATNFEAHSLVVNAIIDQYVSR	Clo1313_2332					115188		10446.1
ATNKEVVLTYEGLQK	Clo1313_0438	239675	105396	51825.1	1261.86	16714.7	5832.39	32055.7	11829.1
ATNKEVVLTYEGLQKLEQELENLK	Clo1313_0438	18588.9
ATNYIGFIR	Clo1313_0925	6407.29	621.632	5112.87		8707.2
ATNYIGFIRK	Clo1313_0925	662.979				9238.73
ATPAQIGSFITALR	Clo1313_1346	216099	411205	596745	1.39956e+06	572130	272661	703152	476228
ATPTAAVAK	Clo1313_0673				76497.4	25927.5	205725	349898
ATPTAAVAKFAAAGK	Clo1313_0673								5965.2
ATQGVTLMR	Clo1313_3024	107818				29894.8		104955
ATSFINSLK	Clo1313_1045				3657.62
ATSFINSLKK	Clo1313_1045	17199.2	33533.1	3044.66	42107.2	2025.43		25283.3	22399.5
ATSLGIYLK	Clo1313_0172	1292.17		347.978				404.791
ATSTPDRDVMNSILR	Clo1313_0581	3024.61
ATTYLPIHR	Clo1313_0195	199268	14752.8	232374	16615.2	42025		167064	12813.5
ATVADSATNVNLNESIDKDKK	Clo1313_1225	23330	12875.2	24014.6	10738.8	2507.99		9840.28	5820.11
ATVEKTDFEVER	Clo1313_3011	742894	1.51456e+06	280134	715986	244739	1.09013e+06	503497	551917
ATVSCGIAQFPTHSDDIKK	Clo1313_1339			2407.84
ATVSGVIEVPENAVLPEEGLHVR	Clo1313_2176						2350.52
ATVVLAK	Clo1313_1686							111780
ATYYIGSDVNER	Clo1313_0397					15393.5
AVADKLETLVDSK	Clo1313_1357	81237.3	131495	529609	535707	35288.3	83639.3	296900	215839
AVADLAVSK	Clo1313_1467		347709	158762	352768	8229.22	369059	25227.6	613315
AVAEAILLFNK	Clo1313_1266			1351.67		286.278	5141.48		661.577
AVAEALDGLPPVK	Clo1313_1502	168793	684440	96990.5	803588		268399	897815	144056
AVAEFQR	Clo1313_2601	5919.81						8158.75
AVAESGAISIIGGGDSAAAIEQLGFADK	Clo1313_2094	2.96679e+06	1.26799e+06	4.06271e+06	3.58695e+09	1.82484e+06	2.02533e+06	2.19139e+06	3.0711e+06
AVAESGAISIIGGGDSAAAIEQLGFADKITHISTGGGASLEFLEGK	Clo1313_2094		2902.53			1890.65	3644.83
AVAKEYGQEDNLVLGANIAGFLK	Clo1313_1847		26454.9		4728.85	6308.29	32517.1	68681.8	74484.6
AVANAAEAFGCR	Clo1313_1953	247651	193336	32180.6	91106.9	5398.63		140778	76682.3
AVATIEQMPGNK	Clo1313_3024	341973		56055		45737.6		163314
AVAVEPTACPTLTK	Clo1313_1046	3.64009e+06	334463	2.39254e+06	1.44987e+06	321098	518561	1.3969e+06	1.71695e+06
AVAVLATNDIEPVDLYK	Clo1313_0166	4457.05		25875.7	3961.2	132615	420049	32868.3	144981
AVAVLNGK	Clo1313_1795	24061	74027.3
AVAVLSDGRR	Clo1313_1808					600.13
AVAVMDK	Clo1313_0022		66078.3		69677.9	53812.4	123600	730700
AVAVMDKADSFNAAGGPLFTEVTSALFTK	Clo1313_0022	276194	12289.9	61463.2	15292.9	36093.6	45754.2	728343	33268.2
AVCASGTAR	Clo1313_0694			597.702		3109.93		1220.91
AVCDAEVVVVVVPSQTVR	Clo1313_1192			4939.17		696.388
AVCHFR	Clo1313_0903							9880.17
AVCSVQVKPAGGEK	Clo1313_2479			6100.26		2230.86		11380.4
AVDAAVEGIK	Clo1313_0433	23086.9	8281.64	775079	3.21063e+06		1.28518e+06		1.13513e+06
AVDAAVEGIKEISQK	Clo1313_0433	228648	338980	117346	447627		128366	23458.1	64694.1
AVDALEK	Clo1313_1390				56083.4
AVDDLNIEK	Clo1313_0568				225279		7636.71	15070.7
AVDDVTFEIYKGETLGLVGESGSGK	Clo1313_0511	2024.94	548.753	42691.2	13901.8			6314.21	10416.1
AVDDYADLLR	Clo1313_2303	1730.98			193659	38476.4		12523.1
AVDEFSSK	Clo1313_2788		84938		351820		2.32552e+06	360991	354656
AVDEMAK	Clo1313_0652							1659.42
AVDEMAKEETFKGYGPEQGYSFLVSK	Clo1313_0652	302.716				20302.3		20596.4
AVDESGNVSAPSNTLVVTTLR	Clo1313_1021						16757.9
AVDEYADLLR	Clo1313_1357		36772	115335	305505	17176.7	6289.86	47104.5	260395
AVDEYQDLLR	Clo1313_2038		32682.3	12220.3	84250.7	1497.15	29213.1	75167.1	55035.1
AVDFHSLEIK	Clo1313_1656			7304.58	6675.9	471.178	14974.2	3482.77	2163.52
AVDFLVQNAK	Clo1313_0328	807665	397986	34852.7	244175	61590.5	39241.6	188211	24936.1
AVDHEVEGSHVTIGADIAK	Clo1313_1122	67514	5356.35	55548		4185.3	8945.36	12481.4	1287.51
AVDHEVEGSHVTIGADIAKK	Clo1313_1122	855.121	11300.3	7718.69	9347.45		9748.89		2614.66
AVDIKK	Clo1313_1002	5410.64						1809.63
AVDKVSETSK	Clo1313_2155		1091.55				12557.4		23791.6
AVDKVSETSKK	Clo1313_2155	1278.41	57292.7			2390.97	33344.3	5539.55	43843.7
AVDREIQQR	Clo1313_2472								3485.91
AVDTGEPIKVPVGK	Clo1313_0195	174399	88849.6	141223	59488.7	28346.9	73994.6	175663
AVDVNLK	Clo1313_1615		166547		92694.7			40325.9
AVDVNVVENFLK	Clo1313_1964	1.42927e+06	934868	1.63785e+06	651878	63214.9	592971	1.32305e+06	1.04546e+06
AVDVNVVENFLKNDHNFK	Clo1313_1964	22995.3	49814.7	19023.9	17262.8	808.67	51536.6	37165	30226.2
AVDYIEK	Clo1313_2165		8978.7	54300.5	42149.8		7229.23	124947	11018.6
AVEAGYWHLYR	Clo1313_0673	29382.4		122436		124919		266185
AVEDGLRVENTDVAAK	Clo1313_0101	875617	305735	409146	357996	2122.06	164141	257908	220832
AVEDIVK	Clo1313_2957		216815					55339.7
AVEDLER	Clo1313_2131							30226.6
AVEEAIDTYSR	Clo1313_2938							1818.46
AVEEATLQAGAK	Clo1313_2143	8054.35	90017.8	5854.23	210257	454.984	208121	98201.1	172789
AVEEAYVLEK	Clo1313_0857	263578	38598.4	427713	7379.16	8834.33	3402.14	12223.4
AVEEDIAILR	Clo1313_1887		183188			15502.8	133474	146915	219477
AVEEGVNLNLEDAR	Clo1313_1962							52270.3
AVEELMEEILR	Clo1313_1218	988.691		214.376
AVEESSGFKAEIK	Clo1313_2097							18798.3
AVEIAVK	Clo1313_2456				92220.9		83596.8	68445.1
AVEIAVKR	Clo1313_2456	347083	268619	65763.6	231599	46542.9	165206	127339	61910.9
AVEIIIGR	Clo1313_2934						3063.36	16080.5
AVEILASLPCVDESR	Clo1313_0613					300845	1294.43
AVEINALWYNALK	Clo1313_2116	21357.1						23620.8
AVEINGVK	Clo1313_0749		48741.1					9814.66
AVELCPDITVAGVAGPGDTLATPYALQTFR	Clo1313_2334		1391.28			9644.07
AVELDEK	Clo1313_2131				114112			96286.1
AVELGFVVGYPDNTFKPK	Clo1313_0884	118646	123882	337894	121851	1.22175e+06	384818	1.10119e+06	269268
AVELGIIK	Clo1313_2176						158624
AVELGLK	Clo1313_1053		117872				67665.8
AVELLEK	Clo1313_1613		255270	163364	441223		141137	1.54893e+06	72320.7
AVELLEN	Clo1313_2601	8166.58
AVELNDMYVIMPPFENSYYINAR	Clo1313_2905	22887.8
AVEMSIPCLTSLDTAR	Clo1313_1268			295988	8404.84	332487		29069.5
AVEMSIPCLTSLDTARAVLECIK	Clo1313_1268		9201.58		6465.22		3191.96		6477.29
AVENAFGNVEWVK	Clo1313_0872		1806.57	1690.86	26696.9		16681.7	9448.86	23622.1
AVENPMFLK	Clo1313_1180			976.127		3096.67		8684.12
AVENTEVLTITRD	Clo1313_1151				6514.41
AVENVNNIIAPEVEGMNVFDQAAVDNLMISLDGTPNK	Clo1313_2090	113858	15934.8	97005.2	32132.4	105283	8230.55	367662	5557.1
AVENVTNQAAQVTQAVKEQAAGAEEIIR	Clo1313_2957		60585.5
AVENVTNQAAQVTQAVKEQAAGVEEIIK	Clo1313_0407		125673
AVEVIHGQID	Clo1313_2549	145628				1555.73		7850.94	17996.7
AVEVLMENK	Clo1313_0997					9661.61
AVEVLMENKR	Clo1313_0997	876013	86792.4	1.07952e+06	93524.1	712508	115576	1.74923e+06	53410.3
AVEVNDVISR	Clo1313_1724	3981.93
AVEYADLVK	Clo1313_1832			294633	1.01855e+06	1865.7	458668	1.90157e+06	1.78396e+06
AVFASDENLK	Clo1313_0781		15600.3					74455
AVFATDKNLQR	Clo1313_2186					14962.2
AVFIINPTYYGIASDLK	Clo1313_2592	3204.23		30800				17166.4
AVFKDFGK	Clo1313_0166						3210.21	16215
AVFKMDGTTLELFIGER	Clo1313_0874			1893.19			3105.19
AVFPWLK	Clo1313_1430						1616.17
AVFQAAVDINR	Clo1313_1305				9679.97	8388.04	60578		173466
AVFYKEVGANVGCITAAK	Clo1313_1012		29806.6	26480.9	131623	13038.2	86546.4	26942.4	122722
AVGAAIFHHDPIYDSGREENDQLAQR	Clo1313_2331		3410.19
AVGADILFGDE	Clo1313_2939	41978.9
AVGFPEDVGEFYK	Clo1313_2036				396044	448511		141131
AVGGLEGVSNVDVDLK	Clo1313_1484			79680			7461.64	12239.9	9708.73
AVGGLEGVSNVDVDLKEK	Clo1313_1484			7698.98			22441.8	25118.7	11254
AVGICGIDGNVIECEQYK	Clo1313_2556	14646.6	210617	51404	89707.9		52176.8	45556.5	79388.6
AVGKIEDIFGGR	Clo1313_1546		14021.3	3449.68	35484.1		1134.92		13208.9
AVGKVIPELNGK	Clo1313_2095	12840.9	53822	112485	363298	56536.8	298309	156107	458412
AVGLFLQEK	Clo1313_1216	4680.73	237.261		514.401	2062.16		1827.97	1038.5
AVGLGYPGGPIIDK	Clo1313_0332	77900.2	1631.83	44630.8	39822		40262.2	104698	147516
AVGLPEGITVNIPDVSEELEQLLQSK	Clo1313_2643					32003.6
AVGQEVLESLTPGQQVIK	Clo1313_1452	113276	81227.2	8279.16	447556	4972.49	115349	130656	313345
AVGVAGVMGGANSEIKDDTK	Clo1313_2017	286644	12808.9	76785.4		35026	905.65	102704	3195.85
AVGWNPICIIIPCHR	Clo1313_2319								2986.57
AVHFLDNVIDVNKYPLPEIDK	Clo1313_2179	298896	377.585	173310		96473.5	5797.46	121318
AVIALREPSLGPVMGIK	Clo1313_0030		3629.64			4501.06		32664.2
AVICIPIYSHESGDR	Clo1313_1404	57748.4	24521.9	13455.5
AVIDGLEADVVTLALAYDIDSINK	Clo1313_0114		20865.7		13005.4
AVIEAAINVSR	Clo1313_0949	972.247	13647.1	921.036		14843.8	152551	14671.5	8612.76
AVIEAMGTPLTNK	Clo1313_1155	651856	2720.85	720439	69391.2	247049	18053.1	1.40397e+06	43226.3
AVIHLVIADKDR	Clo1313_0913	1722.07				33800.6
AVIITDSDHIILSAVQPETVAHR	Clo1313_0940	618165	622338	260974	1.29948e+06	499349	1.34377e+06	1.52227e+06	1.69158e+06
AVILNDSGIIQAR	Clo1313_0073		25515.6
AVINLGFIDR	Clo1313_1314	14054.3	24267.6	3504.92	2026.48	4133.83	2820.11	33462	27294.3
AVINLGFIDRNESIEYAK	Clo1313_1314	597433	411651	465464	301814	194857	554679	466836	257090
AVITGDITQIDLPGEK	Clo1313_1142			4437.44		1128.49		7803.07	1892.48
AVITGDITQIDLPGEKK	Clo1313_1142		5968.24					5836.49
AVITQNIDGLHQAAGSENVIELHGSIHR	Clo1313_2165				2332.56				13584.1
AVIVFD	Clo1313_2265	1.49889e+06
AVIVYTNK	Clo1313_1119					3180.23
AVKDVVNAIR	Clo1313_0872		77244.4	3514.86	8681.37				29987.1
AVKIGINGFGR	Clo1313_2095			1570.1	78835.2	1526.32	76309.9	74583.4	143185
AVKLEGGEDIIENVK	Clo1313_1316							6451.37	3776.64
AVKMEDLVIDTGLSAEEVR	Clo1313_1622				229.611
AVLCEIDR	Clo1313_1530		1079.75						3668.85
AVLCEIDRR	Clo1313_1530	333222		37497.4	57753.8	79699		89577.1
AVLCEKPFTVNSK	Clo1313_0410	51181.2	20224.1	24956.2	11277.5	23243.4	6538.31	32550.5	43713.9
AVLDLDNVDK	Clo1313_1497	21265.9	3064.79		15199.1		8053.15	9745.98
AVLDQLGEDGDFVPCLHSVGAPLK	Clo1313_0415	2.39031e+06	503213	4.12325e+06	1.05964e+06	2.68653e+06	619217	3.91144e+06	1.22579e+06
AVLDQLGEDGDFVPCLHSVGAPLKEGEK	Clo1313_0415	1.93272e+06	774478	3.00503e+06	1.92872e+06	2.2572e+06	1.35283e+06	4.9258e+06	2.60348e+06
AVLDQLGEDGDFVPCLHSVGAPLKEGEKDK	Clo1313_0415	334966	79200	93523.4	242624	538996	60559.8	675540	1.03517e+06
AVLDQLGEDGDFVPCLHSVGAPLKEGEKDKGWPCAPIEK	Clo1313_0415						13790.3		22350.6
AVLDTMGIDVIAFVTEIHGIK	Clo1313_1491		813.106		97246.6	24266.4	7071.22	1057.85
AVLECIKLEK	Clo1313_1268		6405.72		771.951		13918.1
AVLECIKLEKEEK	Clo1313_1268								11018.6
AVLEEFDNNESLIESFK	Clo1313_1621	17159.9	3426.59	2069.12	2848.97		10932.7	3297.39	6111.52
AVLELAGIK	Clo1313_0462	1.07909e+06	615402	78050.9	373301	64476.2	6476.92	420346	268675
AVLELAGIKDIR	Clo1313_0462	2.21817e+06	2.15006e+06	586355	1.60394e+06	370506	437745	1.27506e+06	1.5866e+06
AVLEYTAMFDK	Clo1313_0423					267.22		35342
AVLGNEALK	Clo1313_0867	158479	157424	203664	101121	169754	326304	761840	481426
AVLIATGATPR	Clo1313_2618	86779.7	38853.9	120209	23268.3		299281	177268	18031.3
AVLIATGQPQK	Clo1313_2617	3984.61		424.905
AVLIATGQPQKK	Clo1313_2617	810217	130533	271066	239809	174450	44982.7	290906	153716
AVLKDIQDGVFASK	Clo1313_0101	3.86219e+06	2.55076e+06	1.63755e+06	1.45481e+06	717587	761338	2.74652e+06	822157
AVLLLAGNVPEKR	Clo1313_1673	83813.3	63946	164507	72830.2	65577.7	139637	192697
AVLLLSGGIDSPVAGWMIAK	Clo1313_1151					840.547		826.598
AVLNDIKPAVDNNK	Clo1313_1551	310077	36761.6	58519.6	36031.4	110375	181346	224610	93529.8
AVLREDPDVILIGEMR	Clo1313_1107			1.10919e+06		682506		1.18644e+06	5687.44
AVLVCSEPQNIDLVIGQDMITSYLETK	Clo1313_2265	198513	5096.98	256413	2170.7	164392		421315	5665.56
AVLVTGGAGYIGSHTVAELVEK	Clo1313_2047	69334.9	100779	75690.2	26587	194775	277088	194200	135636
AVLVTGGAGYIGSHTVAELVEKK	Clo1313_2047	26737.6	14728.7		28177.9	74854.1	43131.7		39827
AVMDSINMLPEEYR	Clo1313_1330			14996
AVMDTSTLSSVIGPNGK	Clo1313_1021					1681.89
AVMLSHK	Clo1313_1024							5367.38
AVMPSLSLEER	Clo1313_0554	166413
AVMSSEGLEAALMLPK	Clo1313_2942	187102		128221		12879.2		10926
AVMVAHTLGNPFDLETVK	Clo1313_0145	4015.7		57437.5		30941.4		164674
AVNAR	Clo1313_1817							712.55
AVNDLFPDR	Clo1313_1891		2098.66
AVNDLFPDRK	Clo1313_1891	106998	12957.3					10727.3	26526.4
AVNFFFLGGKPGVAEEAYK	Clo1313_0292							14046.6
AVNGISYTLEPGK	Clo1313_0512	11152.4	10845.6	147114	210010			108471	35259.3
AVNGISYTLEPGKVLGIVGESGSGK	Clo1313_0512	5664.83	12390.9	6472.37	30439.1
AVNIQNQPVPAYGGK	Clo1313_0781	36673.2	3860.03	44736.3	4767.87	53389.1	1642.75	38856.2
AVNMLIDNIEK	Clo1313_1076	43659.6		585.52		46569.8		9155.36
AVNNISNLINSR	Clo1313_2891	108632	174192
AVNTENAFFPNLK	Clo1313_1021					24156.9
AVNTLIDQITLR	Clo1313_2067	5451.36	38842.6
AVNTVLIGLLAK	Clo1313_1615	433318	400195	318204	337319	116331	318333	617179	453710
AVPILHSGPGCGEMIAGFFER	Clo1313_2332					4475.7
AVPIYQTTSYVFNSPEHAANLFALK	Clo1313_2534						193.577		844.709
AVPLTDEEIR	Clo1313_0308	88409.8	17553.8		8108.89		19071.3	8508.54
AVQAALDVNAELDKAEEDL	Clo1313_0063		106259	2356.2	46647.4	5301.11	47017.4	15979.7	60756
AVQEEGANVIITYQSER	Clo1313_0720						25333.9		1270.21
AVQIGGPSGGCLSEK	Clo1313_1792	2.97632e+06	472659	1.98573e+06	1.57362e+06	1.26777e+06	403880	324865	2.14829e+06
AVQIGGPSGGCLSEKDLDLPLDFDSLK	Clo1313_1792	116961	160675	139962	141463	54597.1	33667.3	76132.6	77025.4
AVQIGGPSGGCLSEKDLDLPLDFDSLKK	Clo1313_1792	3.4703e+06	2.90818e+06	1.41978e+06	2.7419e+06	209203	410816	1.49456e+06	1.88178e+06
AVQNGELPQFTVDELFIEIPK	Clo1313_2606	98670.1	9629.67	112642	19878.9	6558.17	48334.4	116260	24283.3
AVQNGELPQFTVDELFIEIPKEK	Clo1313_2606	48456.4		80115.5		2375.93	13924.1	43827.3	13599.6
AVQSMVEDR	Clo1313_2462			2636.15				188801
AVSAVQSVIGK	Clo1313_0848					3764.95	7511.99	108674
AVSDFEYELQMALLNK	Clo1313_0982			6163.35				10274.5
AVSETGIR	Clo1313_1058		17241.1
AVSFAEVLTDEFK	Clo1313_1155	1.0813e+06	212173	1.74591e+06	465444	92383.6	259968	1.46792e+06	580169
AVSFAEVLTDEFKQYQQQIVK	Clo1313_1155	92897.4		107483		10411.1		57901.4
AVSITNDYIQSFR	Clo1313_0078		41008.2						885.961
AVSLEQFR	Clo1313_2326	37164.6	121885		3001.46		27623.9	102575	190919
AVSNFILGDVSR	Clo1313_1183			638.33	123177		4249.23	92185.2
AVSPIIDELAEEYDGR	Clo1313_1862	4.89392e+06	4.35914e+06	5.84944e+06	4.53174e+06	8.51714e+06	4.9773e+06	8.2307e+06	6.24574e+06
AVSQIDKR	Clo1313_2459	36703						49659.2
AVSQVWNEK	Clo1313_1929	95483.1	5823.89
AVSQVWNEKFEVAR	Clo1313_1929	101539	57723.4	16665.7
AVSSSTITMAGNAIGSVHYFSPEQAR	Clo1313_1663	67140.6	656.213	72855.5	427.263	35799.2		39759.4	2295.79
AVTEASGNVNADTIYDIACTGVDIISVGGLTHSVK	Clo1313_3017		45943.8		18461.5		37874.6	6957.93	34370.8
AVTEIEAYQTLYEFIQK	Clo1313_2852							6321.53
AVTGKPIK	Clo1313_1452	16313.5		3248.14	3522.55	3881.45		51551.4	2076.08
AVTIEFEVTDK	Clo1313_3011	5360.41	2142.51	794.374		1326.06	3195.87	4535.41	696.701
AVTINAAELTGIADR	Clo1313_2450		104512	2547.89	20336.5	393.188	1414.7	5558.13	50455.7
AVTQCGCVK	Clo1313_2457		8624.87	18507.4	32161.4		29834	235899	74766.9
AVTTIDFMTADWAK	Clo1313_1846	46420.3		92014.3		14425.7		13757.9
AVVDEIFK	Clo1313_2532	108057	248868	121711	883261	396064	4373.72	475724	513711
AVVDEIFKVK	Clo1313_2532		13943.9						276.804
AVVENNKVR	Clo1313_0016		16578.3						3623.94
AVVISNPLGEDYSIMR	Clo1313_2017	523541	5948.7	342605	4677.06	62427.5	7347.58	250914
AVVNGYEVPLDVAPAIVNSR	Clo1313_1819	453673	1.25621e+06	212389	29805.6	452320	240588	697551	4135.68
AVVPDGCQIGK	Clo1313_0717	170847	182456
AVVSVTFDNEFVVHDIK	Clo1313_0216	305169	144347	392653	292756	701111	16501.4	578713	50523.5
AVYDCLKEDGIFVAQTESPFIDK	Clo1313_1530						9095.48		1727.22
AVYDCLKEDGIFVAQTESPFIDKELITR	Clo1313_1530	59118				6012.21	3331.15
AVYDGLYQPGNSK	Clo1313_0133							27918.4
AVYHAVNNALLSK	Clo1313_1446	47205.7	12607.1	23290.8	13818.8			64397.3	11469.5
AVYIRDDDTPETLQK	Clo1313_1011			20085	9292.92		8320.72	3284.89	46430.5
AVYIRDDDTPETLQKR	Clo1313_1011				4309.3			2936.53	23599.7
AWAEVNLDNIAHNVK	Clo1313_0288	38241.6	8924.82				962.12	14633.6
AWAFIK	Clo1313_1076		12638.2				19013.7		3617.05
AWAQNRPK	Clo1313_2901	884.441
AWDELNGSLAISGNEADIKR	Clo1313_1819	122369	249097	24102.2		240735	17959.8	87708.8
AWDGYK	Clo1313_1954	229124				9094.49		125147
AWDGYKVTR	Clo1313_1954	4914.71	68188.6		23330.5	150.831	1632.4	11300.5	10228.3
AWDIQR	Clo1313_1106	11829.5			11654.4
AWEWKRHYGGRIVEQLK	Clo1313_1902					7168.83
AWFCIRPSGTEPK	Clo1313_0993				3014.95		4047.27		18732.4
AWHAETLR	Clo1313_1021					3878.37	1747.5
AWHDTSEAIK	Clo1313_2638	1.26444e+06	630405	2.35291e+06	1.76407e+06	593773	1.05124e+06	2.16543e+06	888373
AWHDTSEAIKK	Clo1313_2638	9.96664e+06	4.01301e+06	1.55089e+07	8.05169e+06	6.65919e+06	5.86905e+06	1.75956e+07	5.03999e+06
AWIPAIK	Clo1313_1437	161044	4124.23	197297	271467		69498	413818
AWIPAIKNNGGRIK	Clo1313_1437	955.524		30784.6				812.099
AWISGPSDVIDLIDNLK	Clo1313_1096			4040.2				2870.94
AWISGPSDVIDLIDNLKTEPIDIENMSQSMTK	Clo1313_1096			24284.8				50136.9
AWITQINK	Clo1313_1589					4050.89	944.462
AWTIVK	Clo1313_1342				134247			74230.3
AWVLVK	Clo1313_0291				27725.8			110835
AWVWVAER	Clo1313_1701					1201.33
AWYNFYCSEGK	Clo1313_2747					199422
AYALIGLEK	Clo1313_0600	502.938
AYAMTGWR	Clo1313_1858	6562.13						362.542
AYCVLGALNVYNAK	Clo1313_2975					187266	2654.67
AYDASVQDELAFVTSCVLEK	Clo1313_0872		3744.81	1417.75			3267.97	4904.39	2378.3
AYDCAQLEYEVLK	Clo1313_2225							24038.3
AYDDFGR	Clo1313_1954	739967	300616		87620.1		301307	55787.6	176301
AYDDFGRK	Clo1313_1954	18689.3		27749.3	36851.8	537.328	100416	62560.1	151178
AYDIVLNGTEIGGGSIR	Clo1313_0923						1004.28
AYDPQAMEEAK	Clo1313_0901			3925.23
AYDPQAMEEAKK	Clo1313_0901	146689		140840		1732.47		84457.8
AYEADPVSIFGGIIAANR	Clo1313_1012	888101	689437	2.58355e+06	3.40303e+06	1.81749e+06	3.85477e+06	5.25665e+06	5.87801e+06
AYEADPVSIFGGIIAANREIDEK	Clo1313_1012				8758.58		7037.51		14700.9
AYEFGAVENPEFSFIDASEIGDWSK	Clo1313_0884					7333.9		4154.56
AYEFGAVENPEFSFIDASEIGDWSKPFVGK	Clo1313_0884	19614.7		45508.6		194092		375255
AYEFPNCDTPVK	Clo1313_1849	6913.71	191005	304656	422961		248118	427425	168796
AYEFPNCDTPVKVGK	Clo1313_1849		1260.38
AYEGK	Clo1313_1875							3421.06
AYEGVGK	Clo1313_1013				51248.4		18849	93775.1
AYEIANEDDVEGCVLTAEILNEAISR	Clo1313_0038					1218.45	5754.62		4153.84
AYELQDQGKDTVEANVLLGFPPDLR	Clo1313_2125		783.685	6068.68
AYEMIEQFNTVEK	Clo1313_1954	169858	13302.3	31270.8		166737	18749.8	37058.3
AYEMIEQFNTVEKVDK	Clo1313_1954	352.933				386.847		6148.81
AYENGASDPVAR	Clo1313_1798		402608	1.27622e+06	1.71229e+06		656461	2.29734e+06	889800
AYENKTPVNAYVVEVVK	Clo1313_1510	240254	145335	92694	96814.7	96109.9	84800.8	152338	92784.8
AYEQSNEIISNAQK	Clo1313_0983	498.949	7397.48	26486	82996.3		10166.6	47818	10036.9
AYEVPETEEELYSVIEK	Clo1313_1439	3415.56
AYEYIDNNR	Clo1313_1833			238668	795294		738152	341175	521059
AYEYIDNNREITMK	Clo1313_1833	2665.34		1.76703e+06	95217.1	817522	26436	1.79522e+06	95183.1
AYFAYNEDGLLVER	Clo1313_0283						7884.6
AYFGQK	Clo1313_1317	54074.4			76036.6			103759
AYFIAIPTSAGTGSEVTPFAVITDEK	Clo1313_1798	7.92794e+06	1.05396e+06	1.33735e+07	1.86709e+06	3.32842e+06	1.06969e+06	5.3823e+06	1.82804e+06
AYFIAIPTSAGTGSEVTPFAVITDEKTGIK	Clo1313_1798	2820.7		1239.7				3113.93
AYFNMNNK	Clo1313_1081					3967.6		1374.54
AYFNMNNKR	Clo1313_1081	2282.11		19486.7		23243.6
AYFPGETNVPELVSLIK	Clo1313_0935	242351	60269.4	172486	6679.17	48569.7	95707.5	192749	119444
AYGGAYIAMNSK	Clo1313_1526	68379.1		110808		12861.9		152355
AYGHKDPVIEYK	Clo1313_0863	268857	70290.6	161116	5726.72	345057	64730.5	198120	48756.8
AYGIK	Clo1313_2047							559.716
AYGIVDEVMER	Clo1313_0329	852695	182179	361711	254106	138196	5746.72	82260.2
AYGQSSVFEAAVIFAR	Clo1313_1046	235350	8298.38	2.78517e+06	29903.4	427544	101635	1.16651e+06	17258.5
AYGYQLSIK	Clo1313_1030	20364.4	107018	35996.2	159382		14049.7	264214	122383
AYIDGYLDRYPNVK	Clo1313_1334	10191.7				11307.1	3555.37	7169.28
AYIDNINLAQSK	Clo1313_0781		2311.21
AYIEENGDNLLYVDSEER	Clo1313_2606		4399.6						22640.1
AYIESR	Clo1313_2018		56911.7					3121.26
AYIIHCDSAGYMNLIEGK	Clo1313_1483					2424.17		4699.93
AYILDGEGRPVNLQVGYGTVPMATLK	Clo1313_0208	93439.4
AYIRPFAEEK	Clo1313_2159			17222.7	6957.19	22446.4	53844.5		4316.07
AYIRPFAEEKLPETEEGR	Clo1313_2159			23201	146995	198271	571678	3265.87	9325.54
AYISAVDR	Clo1313_1344	49362.9	14295.2		51465.6	4775.44	9299.24		21403.1
AYIYEEVSR	Clo1313_1542	123506	277611	117884	271558	105895	226570	683941	266799
AYKDVIIPLMNELR	Clo1313_2303	126300		242644	32614.3	402076		458382
AYKEILENK	Clo1313_1608					4022.91
AYKNMNFIFTK	Clo1313_0229	2592.82
AYLDSLVDFIYSK	Clo1313_0913					126.712
AYLETYDHNDDQTQWFEK	Clo1313_1578		21231.8						1903.9
AYLLAGAR	Clo1313_0424			3359.1				555.033
AYLLVGTGTR	Clo1313_2642					154.358
AYLPATSVAGAFR	Clo1313_0758	72137.1		29791.5		16412.3			19567.9
AYLSGLGPVK	Clo1313_1631		2887.73		2929.33		903.553	46516.6	8873.47
AYLSGLGPVKEYAEASSPLTGFLR	Clo1313_1631	7616.61				3021.13		15773.1
AYMSFERKFEKDVLTVR	Clo1313_2116								16936.6
AYNAWDSLDISGAADNLSK	Clo1313_0762		8527.92	1780.08	4376.58	294.243		7676.18	2864.7
AYNDVYGFASGDR	Clo1313_2478	118198	99010.8
AYNLKEVAK	Clo1313_0023		33665.5		23254.4		3118.67
AYNLREDFPEEVIR	Clo1313_2086						2556.77
AYNLTIPPTGR	Clo1313_2832		4599.88	12562.1	43522.1			197311
AYNPLFIYGGVGLGK	Clo1313_0001	15430.6	1156.15	36280.2		2001.25		3452.74	11784.1
AYPCFCSEEELEEIR	Clo1313_1578		1557.12
AYPCFCSEEELEEIRK	Clo1313_1578		28648.6	9011.48	4436.06	5327.04	14448.2	3891.83	18667.4
AYPECVSVFILPPSFEELR	Clo1313_0941							24097.8
AYPGVVIGIK	Clo1313_0041	32685.7	61412.4
AYPHQLSGGEQQR	Clo1313_2552	61611.4		31391.8		30115.1		44480.7
AYQEGAQINLMGGMDTYAK	Clo1313_2429	9543.04		1380.94		1441.88		78485.3
AYQISQYDLPLCR	Clo1313_1183		8838.91		5851.01		10326.4	8908.42	6813.25
AYQLNNFMQLTMPYLAGFVPKEYDIR	Clo1313_0152			100891
AYSCDITYGTNNEFGFDYLR	Clo1313_0863			1995.76		12632.4
AYSVSNHR	Clo1313_2555	89260.1	95483.7				3716.32	53231.7	14224.7
AYTTAEIINR	Clo1313_1517					1857.16
AYTTAEIINRK	Clo1313_1517	5000.01				8909.46
AYVCDLSADEIR	Clo1313_1301	345383	155875	280248	120274		107586	214002	109201
AYVCDLSADEIREYR	Clo1313_1301		10563.1		20767.5
AYVDVDNLSNDIIINK	Clo1313_1096			12290.1	4605.23		4792.71	7375.68
AYVEDVMQLVQLKH	Clo1313_2116	46724.1	503.946					433.253
AYVIKDPVMCVTTK	Clo1313_1267	505397	17585.2	657928	28620.4	556837	3405.5	587794	2173.53
AYVNITPQVQECIDESGIK	Clo1313_1764	2141.13					18332.8		1956.74
AYVNWCPSCATVLANEQVVNGVCER	Clo1313_1020	41926	33504	24696.5	31950.6	19897.4	37010.9	21004	29488
AYVPEGTLDFSK	Clo1313_0863	6585.61	7332.83			53147.1	9966.14	10674.5	5888.67
AYVPEGTLDFSKEQMEDLNKEK	Clo1313_0863	4063.35				110624		3191.25
AYVQAGAGIVADSVPER	Clo1313_1344							6212.4
AYVQAGAGIVADSVPEREYEECYNK	Clo1313_1344		7217.87	834.358		621.697	10585.7		12921.3
AYVVGPASFYSMR	Clo1313_0075	31412.3		4445.12
AYYCPSLEDIQSLSIINELAYR	Clo1313_0054					104382
AYYFK	Clo1313_0418				68794.2
AYYKPSQPLGR	Clo1313_1021					28446.8	4016.51
AYYYMDDLGK	Clo1313_0318	878578	1673.28	211923		63681.7	37185.6	381802
CAAANAGNDHR	Clo1313_1357	285.298							864.53
CAADHVSEVTVSVVPLPNDEMK	Clo1313_1122	7215.08		35136.1		5859.12		13617.2
CAADHVSEVTVSVVPLPNDEMKGR	Clo1313_1122			21461
CAAGVCK	Clo1313_1882	3813.06	4384.34		334.632		475.905	3559.39
CAAHVASLTDVNEAYLAGQAAVQYAVEGK	Clo1313_1876	92244.5	916032	57044.8	576172	78130.2	7.52667e+08	373312	846216
CACGATYETGSTK	Clo1313_2831		1693.87	159976	1286.49		238.317	230795	149244
CADAAQVPAGGALAVDR	Clo1313_1759						5943.35
CADTPNCPVAAIENR	Clo1313_1846	321169	27558.6	111886			18538.2	7542.16
CAFGITEKEPGGK	Clo1313_0078	14199.8	21544.4						7415.69
CAIELK	Clo1313_2239	13726.2			58704.8			87535.9
CALAWYLDGR	Clo1313_1123					1744.47		42877.3
CALFTDDDHADDVK	Clo1313_2728	413.585
CALSDAAQQLPPEDFCELCK	Clo1313_2468	351604	223292	148594	93069.5	455511	473474	442979	185743
CALSDAAQQLPPEDFCELCKDISK	Clo1313_2468	196529	306843	149749	180799	308049	571249	388528	336482
CANQSGNVARVVVDLQQK	Clo1313_2048								502.356
CATITPNAQR	Clo1313_1944	166284	41898.6	71810.8	262398	6068.04	139809	236832	728087
CATITPNAQRVEEYNLK	Clo1313_1944	10536	23553.8		3566.56		7483.42	2870.57	14673.7
CATTVGEVLGK	Clo1313_3024		3715.95	2919.92		2064.27		5221.41
CATVIEPLISK	Clo1313_1902	136277	123076	34010.9	106638	101584	128038	126149	66182.7
CAVNQLEPGDK	Clo1313_1654	88590.3
CAYTVVPK	Clo1313_0652			835.435	71325.4	101120		7463.44	3386.37
CCDACEDVADAIENVIMK	Clo1313_0552	303018		269097	33397.3	68391.3		411846
CCDDKECCGELGLEK	Clo1313_0498	2478.33		2673.6
CCEGLNALLR	Clo1313_1269			109365	47847.8	78930.6	36409.9	95982.5	30486.5
CCQCVAYHR	Clo1313_2231	3167.44	9558.35	4149.28			42727.8		26083.8
CCVFNPVSPILSAK	Clo1313_0853	56491.4
CDCGEQLHK	Clo1313_2125	20967						23562.9	16834
CDDIHHGIDDED	Clo1313_1502	854.347						28094.1
CDFAVVDVPGEPGNK	Clo1313_1809		587.998	6561.56	8389.51	53401.9	216278
CDFMTWDMPSKENCPK	Clo1313_1760					3454.44
CDICSKDVLFGLK	Clo1313_0979		10791
CDLLPYVDFDEDFFIDGVR	Clo1313_0568			1274.4				11083.6
CDLVIMTGGLGPTQDDLTK	Clo1313_1161							19037.3
CDMVDDEELLELVEMEIR	Clo1313_0319	3.79796e+06	727.931	2.89168e+06	305080	779874		3.82017e+06	1923.18
CDVALPCATQNELDGNAAK	Clo1313_1847	374236	472262	247655	573003	8747.85	640200	3.0687e+06	1.17068e+06
CDVLVAPTAPNTAFPLNYK	Clo1313_2305	4287.75
CEGVLNIAEGCLGK	Clo1313_2815					234412	195806		235326
CEGVLNIAEGCLGKLEE	Clo1313_2815	17761.1	13057.8	6310.15	41733.2	8911.38	235991	22778.2	18779.4
CEIGDGYFYDVEADNLLK	Clo1313_2641					315.301
CEITPEEYFVTNGIVGIK	Clo1313_2559	32231.2	183695	2506.11	10543.6		7460.66	17630	8750.74
CELCTNNIHGTPQCVK	Clo1313_2034				21664.8	90808.6		27877.1
CFAIQAGR	Clo1313_1122	241695	323783	272243	645472	53603.7	330938	277567	336375
CFEAIR	Clo1313_1853							14944.8
CFEIER	Clo1313_1879	1.71764e+06	610820	164258	508265	28250.8	214642	594218	381940
CFEIERR	Clo1313_1879	268609	236561	71982	123182			149774	88512.3
CFEYFK	Clo1313_1058					1954.55
CFFGIDAGSTTTK	Clo1313_0925	94093.7	97787	59575.1	53385.4	315.587
CFGPDK	Clo1313_1833							74860
CFGPDKADVIYDCAGNNTTMEQAIK	Clo1313_1833	1843.95		4.11616e+06	60820.8	1.63262e+06	56222	4.77229e+06	21100.8
CFGVSVYNGSK	Clo1313_0706	8267.68	6281.98		5764.49	124829	1.2092e+06	9079.64	446492
CFGVSVYNGSKR	Clo1313_0706		20065.3				233354	23188.2	57873.5
CFLTLLER	Clo1313_0070	2680.74				912.385		873.655
CFNATK	Clo1313_0627	3930.86			1463.13	14808.7
CFYITCIDEPEKLEPFSK	Clo1313_2244			4366.43				2999.83
CGACIETCAFHAILEG	Clo1313_1792	404913	373091	739831	358221	102556	118315	292867	447442
CGADFAVNTK	Clo1313_1833	2313.96		1.0523e+06	146769	591839	364961	189715	178195
CGADFAVNTKK	Clo1313_1833			243661	70581.5	149690	141815	435154	288774
CGADFAVNTKKEDFGEAMLR	Clo1313_1833			158042		208751		1.07543e+06
CGAIPSFK	Clo1313_0467	47256.6
CGATVTTAPIPELGHDFGSWK	Clo1313_2479								2312.55
CGEGITGGR	Clo1313_3023					6092.51
CGETGIDALIVPDIPFEEKEELAPFCK	Clo1313_0837		24055.3
CGFCTGCFTGK	Clo1313_1009	32167.3	747.544	66256.3	137068	38150	78556.5	134239	167590
CGFCTGCFTGKYPMEVPK	Clo1313_1009	4353.44				11473.1		143780
CGFPCMVVAR	Clo1313_2121	87010.8		28769	15838.2		21646.9	51767.7
[truncated: 21,837 more rows]

## Sheet: Identified_Proteins
	Summed Raw MIT of ALL ID'd Proteins (not for quantitative comparisons --> see next tab)
locus	1004_Bio1	1004_Bio2	1210_Bio1	1210_Bio2	1199_Bio1	1199_Bio2	1149_Bio1	1149_Bio2		Quantifiable?
Clo1313_0001	1.3828e+06	1.0213e+06	526469	801138	272678	517394	2.6667e+06	748953		1
Clo1313_0002	1.06041e+06	592496	603166	294266	272584	233443	1.85509e+06	594072		1
Clo1313_0005	331767	29696.8	84060.3	48057.9	91936.9	21684.4	328927	36455.5		1
Clo1313_0006	1.18412e+06	764283	372784	271152	150249	42087.6	689254	112624		1
Clo1313_0007	388130	238605	368612	102237	388967	498109	859509	463498		1
Clo1313_0008	719632	377866	547103	364984	79790.8	125340	1.18481e+06	519324		1
Clo1313_0009							27100	21927.7		1
Clo1313_0010		6172.08	6726.89				121702	23637.5		1
Clo1313_0011	2.6012e+06	1.60099e+06	1.75821e+06	1.31951e+06	1.42023e+06	1.46827e+06	3.73056e+06	2.16962e+06		1
Clo1313_0013	709204	830932	406576		158995	86182.2	553872			1
Clo1313_0014	218084	31415.8	53267.9				231367			1
Clo1313_0016	312016	504282			102714	143225	346567	265554		1
Clo1313_0020	5.5803e+07	2.6897e+07	2.69039e+07	3.36578e+07	2.06632e+07	2.19896e+07	4.16478e+07	3.69537e+07		1
Clo1313_0021	2.55064e+07	7.52902e+06	9.70702e+06	7.16387e+06	8.87588e+06	6.70315e+06	1.32278e+07	8.41999e+06		1
Clo1313_0022	3.69408e+07	1.60618e+07	1.36412e+07	1.88e+07	1.54254e+07	2.30115e+07	2.84641e+07	2.40975e+07		1
Clo1313_0023	5.10203e+07	1.65339e+07	2.48908e+07	2.1104e+07	2.03671e+07	1.43679e+07	4.28021e+07	2.19948e+07		1
Clo1313_0030	2.52383e+06	1.14418e+06	861063	251255	785278	698908	2.72934e+06	748802		1
Clo1313_0032	374692	101103		20634.3	218735		113978	166091		1
Clo1313_0034	17587.3	20124.5	14001.1					5973.75		1
Clo1313_0035	830651	525099	252127	202438	122767	229261	414159	104420		1
Clo1313_0037		18868.6								0
Clo1313_0038	397886	232388	436771	117562	201038	281082	739832	358033		1
Clo1313_0039	4.10882e+06	2.11398e+06	1.2738e+06	1.14445e+06	1.12127e+06	1.84086e+06	2.48699e+06	973521		1
Clo1313_0040	12061.3									0
Clo1313_0041	120944	117731	47825.2		48181.7					1
Clo1313_0043						15977.6				0
Clo1313_0044	10849.1		25320.9		28941	215744		20216.9		1
Clo1313_0047	43311.4									0
Clo1313_0049	124235		41769	6891.81			48469.6	48423.4		1
Clo1313_0050		34055.7								0
Clo1313_0051					32465.8					0
Clo1313_0053	2.95375e+06	1.16659e+06	2.88674e+06	1.24407e+06	803142	785555	3.14154e+06	2.29898e+06		1
Clo1313_0054	131592	27787.5	43938.4		2.89816e+06	110018		55503.3		1
Clo1313_0055	96551.8		42310.2		1.80008e+06		94396			0
Clo1313_0056	106937	125763								1
Clo1313_0057										0
Clo1313_0058	27053.7						231445	12281.4		1
Clo1313_0061	2.00875e+06	1.88967e+06	1.04656e+06	3.06132e+06	906351	3.07325e+06	6.43451e+06	4.24263e+06		1
Clo1313_0062		416037				566856	1.06799e+06	960385		1
Clo1313_0063	808500	798170	454792	1.39029e+06	249835	1.25641e+06	1.4962e+06	1.53404e+06		1
Clo1313_0064	198109		115320	84237.3	43851.7		301684	173521		1
Clo1313_0066	884175	259496	779918	535218	582671	442573	2.50656e+06	1.40985e+06		1
Clo1313_0068	137405	21380.5	290184	79589.6	179117	91023.7	697834	71945.9		1
Clo1313_0070	27343.4				19136.2		42386.8			0
Clo1313_0072	68839.9		7737.87	3815.75						1
Clo1313_0073		74261	40470.6					63530.4		0
Clo1313_0075	353808	143934	219868	28672.7				139399		1
Clo1313_0076	110620	134019	73658.5	58423.8			304318	152158		1
Clo1313_0077	2.05801e+06	1.40305e+06	2.05215e+06	1.29018e+06	112526	41205.2	2.90886e+06	1.33096e+06		1
Clo1313_0078	27654.9	185110						47382.7		1
Clo1313_0082	125865	43025.7	82949.8	53041.5	24823.9	103620	173681	201630		1
Clo1313_0084	648487	228344	110843							1
Clo1313_0089	34381.1		18421.1	88663.5			129524	136268		1
Clo1313_0090		22756.9					55501			0
Clo1313_0094	58120.1		30956.3	78445.4		28284.7		88562.5		1
Clo1313_0098			11741.2							0
Clo1313_0099	1.29115e+06	737405	585280	623219	312163	226609	2.16345e+06	265739		1
Clo1313_0100	1.17433e+06	2.31696e+06	808817	1.68704e+06	194561	1.01665e+06	2.50502e+06	1.68493e+06		1
Clo1313_0101	3.2883e+07	2.08334e+07	2.34333e+07	1.35825e+07	8.33918e+06	7.2647e+06	2.95044e+07	9.66876e+06		1
Clo1313_0102	5.36959e+06	3.11276e+06	1.64417e+06	913106	1.19613e+06	1.18809e+06	4.04949e+06	880757		1
Clo1313_0105	106669				37324	47529.5	76578			1
Clo1313_0107	15953.3									0
Clo1313_0110										0
Clo1313_0111										0
Clo1313_0112										0
Clo1313_0113										0
Clo1313_0114	559476	32479.6		69709.2				39970.8		1
Clo1313_0117										0
Clo1313_0118	18013.9									0
Clo1313_0119	107048									0
Clo1313_0120			975.425							0
Clo1313_0122										0
Clo1313_0123										0
Clo1313_0124										0
Clo1313_0125										0
Clo1313_0126	204882	21737.7	83676.8	19531	83918	54566.4	145709	36122.6		1
Clo1313_0133	367546	8151.76	104642		558351	20987.4	146910	10933.9		1
Clo1313_0138	891764									0
Clo1313_0139	159852	6148.8								1
Clo1313_0141	72363.4	17204.4	7012.44							1
Clo1313_0142	209216	31881.9								1
Clo1313_0143										0
Clo1313_0145	59869.9		92438.5	1555.56	63256.6		695732	6514.74		1
Clo1313_0148	249703	21801.8								1
Clo1313_0152			139646				188864			0
Clo1313_0157			13693.3							0
Clo1313_0159										0
Clo1313_0163	13062.1		6952.48		6900.21					0
Clo1313_0164					18175.6					0
Clo1313_0165	199674	94892.5			105621	993266	123018	39550.1		1
Clo1313_0166	408474	369660	296316	229800	304279	1.44862e+06	777165	530301		1
Clo1313_0168	620520	154710	365981	102900	498602	525681	593460	182263		1
Clo1313_0169	171955	18473.7	82607.4		127808	100747	241365			1
Clo1313_0171	44715.3				16577.7	60707.8	93332.6	44667.1		1
Clo1313_0172	18942.9	12322.4	49600.3		59902.9	16809.2	49281.2	32790.5		1
Clo1313_0173						38559.8				0
Clo1313_0174			10480.8							0
Clo1313_0175	311533	568501	341601	367281	145343	655325	1.01003e+06	671728		1
Clo1313_0177					59842.9	5858.61				1
Clo1313_0180	598936	332662	154490	146584	202176	259156	270352	163771		1
Clo1313_0182	11813.8	24309.8	8769.57		63349	35498.1	18336.3	23493.2		1
Clo1313_0183	102765				104591	80310.6				1
Clo1313_0184	132042	127929	74106.3		95895.3	113471				1
Clo1313_0185	4.5326e+06	463320	3.22847e+06	634164	1.37029e+06	869626	6.839e+06	862311		1
Clo1313_0186	212690	35141.3	247387	57057.3	168748	363257	521048	65166.6		1
Clo1313_0188	156856		106813	59476.9	79495.3	76813.5	168058	53183		1
Clo1313_0191	23470.6	15393.1	68680.8	56216.3						1
Clo1313_0192	21512.9									0
Clo1313_0193	565571	378189	880946	1.25921e+06	134654	345005	1.42002e+06	369913		1
Clo1313_0194	58315.9	21818.5	25407.7	31764.9			50175.4			1
Clo1313_0195	1.51599e+06	840921	1.92226e+06	1.01947e+06	300581	1.17431e+06	2.41062e+06	662967		1
Clo1313_0197										0
Clo1313_0198	104902	118354								1
Clo1313_0199	310271	123565								1
Clo1313_0200	53803.4									0
Clo1313_0202	173206	31209.9	311113	61981.7	87450.2	145113	364689	177712		1
Clo1313_0203			30042.1							0
Clo1313_0206	2.44257e+06	1.51835e+06	1.09546e+06	859285	1.23149e+06	2.1701e+06	2.9578e+06	1.01931e+06		1
Clo1313_0208	201867									0
Clo1313_0213	206456		166062	17383.1	112133	351584	254759	155806		1
Clo1313_0214	40677.4	20463.8								1
Clo1313_0215	182787	37954.9	119221	58984.3	121201	483838	725097	94355.5		1
Clo1313_0216	3.28041e+07	8.64608e+06	1.22931e+07	5.84181e+06	1.09469e+07	3.9555e+06	2.0716e+07	4.57474e+06		1
Clo1313_0217	832047	458290	207279	141818	115951	550485	330579	490148		1
Clo1313_0218	2.82434e+06	2.97694e+06	1.95507e+06	2.92395e+06	877482	3.53626e+06	4.10779e+06	3.21432e+06		1
Clo1313_0220		35031.5				17044.8				0
Clo1313_0221	715932	647953	188519	578707	69751.6	749413	1.05483e+06	1.41951e+06		1
Clo1313_0226	4082.07									0
Clo1313_0229	2592.82									0
Clo1313_0244	27322.2									0
Clo1313_0245	260472	52424.3	113621	52601.5	65282.7	38558.2	237737	42178		1
Clo1313_0246	6.79161e+06	2.26797e+06	2.58745e+06	1.17274e+06	790700	1.11229e+06	5.14157e+06	865691		1
Clo1313_0247	103733									0
Clo1313_0251	52484.1									0
Clo1313_0252	11754.6	32933.5			47717.8	1529.96				1
Clo1313_0253	12769.1				27407.5	82010		59898.4		1
Clo1313_0255	410810		186031	33153.5	42074.1	19317.1	392984	24293.2		1
Clo1313_0266	1.78043e+06	2.40539e+06	1.82398e+06		1.42994e+06	582285	4.60653e+06	227084		1
Clo1313_0269							103667			0
Clo1313_0270						11452.8				0
Clo1313_0275										0
Clo1313_0276	2.93504e+06	1.11049e+06	2.21643e+06	513169	2.37229e+06	1.1137e+06	5.26244e+06	1.32187e+06		1
Clo1313_0277	172717		140527		34754.3	133066	98186.5	192699		1
Clo1313_0280				60424.4		94184.8		58654.6		0
Clo1313_0282	30611.6		16577.8	12078.4	22738.7	85598.9	45526.9	57903.9		1
Clo1313_0283	34502.4	46184.5		18880.2		223034	91968.4	76105.1		1
Clo1313_0284			180432		167965	48580.4	755094	9730.07		1
Clo1313_0285			85404				204452			0
Clo1313_0286	24438.9					39961.6				0
Clo1313_0287	167035	41271.4	22722.8	103923		130524	92813.5	114730		1
Clo1313_0288	251216	52973.5	63952.1			40029.4	208959			1
Clo1313_0290		5622.68			45622.7	91558.4	46068.9	39301.5		1
Clo1313_0291	163704	122556	113651	45806.5	98178.4	35594.8	513623	24460.9		1
Clo1313_0292	70870.1		24988.1		23274.4		253162			0
Clo1313_0293	43927.8		34480.7			160415	128768	39018.1		1
Clo1313_0294							13919.8			0
Clo1313_0295	3.25984e+06	778521	1.93829e+06	801200	1.36737e+06	1.52739e+06	3.78126e+06	1.00677e+06		1
Clo1313_0296	3.93336e+06	1.72645e+06	1.62692e+06	1.16736e+06	1.38922e+06	2.18796e+06	4.17035e+06	1.64581e+06		1
Clo1313_0297	1.53095e+06	598545	1.4577e+06	1.53867e+06	419504	2.44776e+06	3.36813e+06	1.43281e+06		1
Clo1313_0299	2.64252e+06	1.33313e+06	1.58773e+06	1.49106e+06	693163	7.20263e+06	4.18275e+06	3.48167e+06		1
Clo1313_0300	577361	690425	419928	449573	134593	2.20744e+06	794900	1.29883e+06		1
Clo1313_0302	114349									0
Clo1313_0303	161781									0
Clo1313_0304	2.21697e+07	1.01786e+07	1.06964e+07	5.55583e+06	4.38296e+06	3.18868e+06	1.52785e+07	2.9519e+06		1
Clo1313_0305	3.63495e+06	1.8295e+06	1.92703e+06	1.05756e+06	967744	1.80027e+06	3.79384e+06	856234		1
Clo1313_0306	2.32794e+06	428300	14260.5		97961.8		621112			1
Clo1313_0307	136157									0
Clo1313_0308	1.39242e+06	207227	251497	181798	233702	286424	893989	22248		1
Clo1313_0309	7.28705e+06	1.78117e+06	1.24368e+06	1.44122e+06	700462	418365	4.28767e+06	1.21046e+06		1
Clo1313_0310	9.9058e+06	3.01019e+06	3.39733e+06	2.5867e+06	2.45711e+06	764035	7.51407e+06	1.69757e+06		1
Clo1313_0311	1.49505e+07	5.96123e+06	5.33542e+06	3.05869e+06	3.0111e+06	3.31334e+06	8.75017e+06	1.94649e+06		1
Clo1313_0312	1.6088e+07	1.33192e+07	3.39021e+06	7.53041e+06	863963	5.44505e+06	7.28016e+06	4.90865e+06		1
Clo1313_0313	1.3849e+07	6.78089e+06	3.97569e+06	4.03958e+06	2.22256e+06	4.21659e+06	6.61277e+06	2.14522e+06		1
Clo1313_0314	1.60103e+07	7.77495e+06	4.19319e+06	4.23199e+06	2.39592e+06	4.66594e+06	8.26135e+06	4.10665e+06		1
Clo1313_0315	744923	114112	164333	127020	87474.1		440723			1
Clo1313_0316	4.50864e+06	1.10339e+06	1.52354e+06	1.32939e+06	569559	376249	3.50617e+06	946000		1
Clo1313_0317	1.03137e+07	4.16346e+06	3.71951e+06	3.58782e+06	2.45109e+06	871188	5.09524e+06	1.94226e+06		1
Clo1313_0318	3.21059e+07	7.73154e+06	9.67824e+06	7.3914e+06	4.7653e+06	1.10777e+07	2.09578e+07	4.9608e+06		1
Clo1313_0319	2.90347e+08	1.04817e+08	1.60386e+08	7.71515e+07	7.29503e+07	6.41977e+07	1.78241e+08	6.04749e+07		1
Clo1313_0324	246143	96794.1	125441	227944		164251	372590	229013		1
Clo1313_0325			42871.3	32251.8				53052.4		1
Clo1313_0326	41265.5	26833.4	36407.9		24995.1					1
Clo1313_0328	7.38313e+06	2.84406e+06	3.14916e+06	1.2087e+06	1.20729e+06	935906	3.43422e+06	1.14448e+06		1
Clo1313_0329	3.80325e+06	1.91258e+06	1.39191e+06	1.428e+06	616869	1.04739e+06	1.34285e+06	549075		1
Clo1313_0330	882160	344628	196455	140261	8308.73		89527.3			1
Clo1313_0332	230603	67620.9	160432	61352	27721.4	47720.9	324605	275212		1
Clo1313_0335		13868.9					21719.1			0
Clo1313_0336	21105.5	7303.46	11575.1							1
Clo1313_0337										0
Clo1313_0342										0
Clo1313_0349					116277	10852				1
Clo1313_0350					53563.3	18343.5				1
Clo1313_0351						176187		147420		0
Clo1313_0352						26228.6				0
Clo1313_0353										0
Clo1313_0356					27567.3	24606.2				1
Clo1313_0357		8777.41	17222.4		81982.4	98915.6	60943.5			1
Clo1313_0359			25249.6					10576.1		0
Clo1313_0360						15967.5	50570.5	35494.3		1
Clo1313_0365						154665				0
Clo1313_0368						115310				0
Clo1313_0372										0
Clo1313_0373										0
Clo1313_0376										0
Clo1313_0377										0
Clo1313_0378										0
Clo1313_0380										0
Clo1313_0381										0
Clo1313_0387	361649	627686		190896	37461		362383	306110		1
Clo1313_0388	597908	417922	137776	59542.1	330775	24811.7	205070	40144.2		1
Clo1313_0389	124175	126485	3547.99		40988.9	49222.6	66551.4	93718.3		1
Clo1313_0390	134004									0
Clo1313_0391										0
Clo1313_0393										0
Clo1313_0394					36287.9	22587.1				1
Clo1313_0395	202147	36022.5	26333.7				121953	21886		1
Clo1313_0397	1.00664e+06	896618	1.86044e+06	1.00301e+06	268997	701020	3.28342e+06	1.53022e+06		1
Clo1313_0398						21270.7				0
Clo1313_0399					16994.8					0
Clo1313_0400	155120	392202	23630.4	29389.9	2.30363e+06	720161		6235.64		1
Clo1313_0403	3.08492e+06	940000	2.06223e+06	703763	826612	711870	2.87402e+06	491403		1
Clo1313_0405	262571	76493.3	2721.72				19191			1
Clo1313_0406	3486.31	253504					10100.3			1
Clo1313_0407	5.08347e+06	4.98959e+06	44068.2	20437.9		1761.31	1.40707e+06			1
Clo1313_0409	26386.6	20450.9								1
Clo1313_0410	202134	119982	139647	25774.1	97610.4	261129	135539	191589		1
Clo1313_0411	240119		33394.3		9880.5		190603			0
Clo1313_0412				10706.3						0
Clo1313_0413	51558.2	7735.25	32058.5	462758	1.99885e+06	1.15542e+06	13007.5	449105		1
Clo1313_0414							49353.9			0
Clo1313_0415	9.29994e+07	2.99164e+07	5.91701e+09	6.82951e+07	1.07777e+08	3.85296e+07	2.19825e+08	7.6084e+07		1
Clo1313_0416	7.61882e+06	7.58074e+06	4.12964e+06	4.51849e+06	6.51777e+06	5.28098e+06	1.46302e+07	5.72024e+06		1
Clo1313_0417	217287	62407.5			18707.1		43767			1
Clo1313_0418	15446	9566.3		68794.2			18689.5			1
Clo1313_0419						18943				0
Clo1313_0421	46619.9	16247.8	147031	186133	73740.1	27315.1	754528	965610		1
Clo1313_0422	143727	35482.9	190903	134049	130105	4795.8	521336	297583		1
Clo1313_0423	309360	17832	459552	304675	211810	121092	1.3917e+06	1.41267e+06		1
Clo1313_0424			53090.2	23712.6	58841.8		330444	301029		1
Clo1313_0425	42311.5	76082.5	13536.3	15119.5	2756	128074	149220	171739		1
Clo1313_0426	5.57056e+06	1.18324e+06	6.43316e+06	3.45564e+06	3.22079e+06	4.29361e+06	1.01861e+07	5.46452e+06		1
Clo1313_0427	60030.4	154221	13568.7	141862	32637.4	127963	324364	31764		1
Clo1313_0428	1.0786e+06	345171	678821	555014	336328	612967	1.48834e+06	672934		1
Clo1313_0429	1.75748e+06	1.18399e+06	1.856e+06	1.52082e+06	1.26184e+06	1.76995e+06	3.81451e+06	3.80144e+06		1
Clo1313_0430	493913	290767	466941	79066.5	142090	168732	1.15244e+06	330884		1
Clo1313_0431										0
Clo1313_0432	6.37395e+06	3.81039e+06	7.21515e+06	9.00572e+06	1.7143e+06	4.62379e+06	1.16623e+07	6.14667e+06		1
Clo1313_0433	2.99553e+07	1.18584e+07	3.95385e+07	2.66978e+07	5.97159e+06	1.56386e+07	4.72231e+07	1.83491e+07		1
Clo1313_0434	40417.8		12080.9	26144.5	2368.97		54507.2			1
Clo1313_0435			7769.07			113765	260061	25329.5		1
Clo1313_0436	234224	49903.2	243687	124171	30955.1	243046	556532	469419		1
Clo1313_0438	4.16977e+06	1.67757e+06	1.53e+06	641912	259938	133935	1.91343e+06	127006		1
Clo1313_0439	51468.4	68446	63773.4			127163	122641	38713.2		1
Clo1313_0440	203975	624899	40702.4	364577		719381	202637	314365		1
Clo1313_0441	16372.7		35632.4							0
Clo1313_0442							283566			0
Clo1313_0444	1.8337e+07	6.02339e+06	3.42263e+06	4.98814e+06	2.23188e+06	1.75693e+06	6.52123e+06	3.65728e+06		1
Clo1313_0445	5.69209e+06	1.81595e+06	1.05786e+06	1.92261e+06	815082	981409	4.25682e+06	816301		1
Clo1313_0446	9.49724e+06	3.31684e+06	1.99491e+06	1.80179e+06	1.19801e+06	708692	5.22736e+06	2.13163e+06		1
Clo1313_0447	6.71213e+06	2.0521e+06	1.84671e+06	1.32035e+06	645911	454014	3.00789e+06	795004		1
Clo1313_0448	1.27827e+07	6.18961e+06	1.89059e+06	3.22064e+06	2.36156e+06	333565	4.25474e+06	1.31694e+06		1
Clo1313_0449	4.37813e+06	733142	324715	805079	318224		1.00289e+06	690484		1
Clo1313_0450	8.30526e+06	8.10859e+06	1.93473e+06	5.28302e+06	1.0697e+06	1.04341e+06	6.53534e+06	2.51186e+06		1
Clo1313_0451	1.1208e+07	5.52323e+06	4.21604e+06	6.98594e+06	1.76704e+06	2.16233e+06	9.32298e+06	3.81794e+06		1
Clo1313_0452	8.49706e+06	1.06564e+06	1.50103e+06	218426	871108	113251	2.16915e+06	107908		1
Clo1313_0453	1.47984e+06	48246.5	289098	6126.18			670516			1
Clo1313_0454	2.70736e+06	490006	774751	312154	489599	183526	1.62988e+06	412635		1
Clo1313_0455	8.25494e+06	4.49955e+06	1.14818e+06	2.91979e+06	913695	880098	2.65062e+06	1.40394e+06		1
Clo1313_0456	5.57129e+06	1.88804e+06	2.14631e+06	743906	736831	315892	3.53762e+06	1.2659e+06		1
Clo1313_0457	1.9102e+07	5.15756e+06	5.50536e+06	4.95887e+06	3.433e+06	1.26865e+06	1.19816e+07	4.29231e+06		1
Clo1313_0458		337079		140601						0
Clo1313_0459	1.32271e+07	5.4617e+06	5.01248e+06	5.408e+06	2.52181e+06	1.63505e+06	7.04629e+06	3.54096e+06		1
Clo1313_0460	9.9793e+06	3.31061e+06	2.63288e+06	2.54894e+06	1.34871e+06	615791	3.7737e+06	1.27433e+06		1
Clo1313_0461	5.28021e+06	4.15701e+06	2.47862e+06	3.42269e+06	1.20598e+06	1.23165e+06	4.27783e+06	2.93144e+06		1
Clo1313_0462	1.42963e+07	8.43563e+06	3.0982e+06	9.02091e+06	2.03315e+06	2.00614e+06	1.2966e+07	5.75745e+06		1
Clo1313_0463	712616	257460	141086	371798	14122.4		329664			1
Clo1313_0464	8.26917e+06	2.68305e+06	1.42922e+06	1.2766e+06	1.17354e+06	252787	2.57468e+06	829951		1
Clo1313_0465	831372	975544	434524	971526	363124	474349	1.05582e+06			1
Clo1313_0466	7.64782e+06	4.82848e+06	2.48131e+06	4.06731e+06	1.25821e+06	2.07588e+06	6.69696e+06	2.37233e+06		1
Clo1313_0467	201900	146251	54020.7	35463.9	7926.68		131272	30053.8		1
Clo1313_0469	760330	324282	159260	172481	81555.7	76573.6	636536	64722.7		1
Clo1313_0471	6.56838e+06	4.62116e+06	1.208e+06	4.27509e+06	1.01353e+06	696958	4.3594e+06	1.52896e+06		1
Clo1313_0472	3.37785e+06	547630	920003	476218	682728	286896	2.05593e+06	484338		1
Clo1313_0473	1.84605e+07	7.3404e+06	6.79858e+06	6.69667e+06	3.8194e+06	2.88022e+06	8.95314e+06	4.73313e+06		1
Clo1313_0474	9.75667e+06	6.18391e+06	5.62826e+06	8.58729e+06	2.54822e+06	8.20448e+06	1.06835e+07	7.59753e+06		1
Clo1313_0475	7.04155e+06	4.23555e+06	1.55571e+06	2.45584e+06	1.22426e+06	702272	3.88092e+06	2.29465e+06		1
Clo1313_0476										0
Clo1313_0477	20741.4									0
Clo1313_0478	28023.4	42205.8	65388		37034.9					1
Clo1313_0479	184491	332070	32102		30146.1	20054.4				1
Clo1313_0480	612269	318038	230598		117692	24539.6	81514.8	8418.14		1
Clo1313_0482	115091	22929.2	72264.2		105483	668942	57117.8	43490.2		1
Clo1313_0486				113646						0
Clo1313_0489	2.85429e+06	1.64928e+09	2.96793e+06	842244	568095	1.11797e+06	2.00609e+06	791794		1
Clo1313_0490		91622.8								0
Clo1313_0491					64358.6		47894	19567.5		1
Clo1313_0492						172497		219968		0
Clo1313_0496	31366.4	19583.7			9457.05		47220.3			1
Clo1313_0497		14763.3		28461.3		59443.1	211381	105338		1
Clo1313_0498	6.17774e+06	1.56884e+06	3.19722e+06	691990	1.72136e+06	643909	2.19439e+06	811500		1
Clo1313_0501										0
Clo1313_0505					12613	38515.9	104879	12956.7		1
Clo1313_0510	6.20523e+06	2.40909e+06	2.18249e+06	3.91174e+06			4.34673e+06	479735		1
Clo1313_0511	1.07471e+06	561587	1.15747e+06	771277			1.11467e+06	46859.5		1
Clo1313_0512	2.23722e+06	740612	2.16546e+06	2.5446e+06			2.39724e+06	212463		1
Clo1313_0513	243080	534750	272303	942486			358939	89237.8		1
Clo1313_0514	534004	226791	337625	138277			156964			1
Clo1313_0519	205355	75096.5	340062	481738	96163.4	467822	1.73553e+06	220742		1
Clo1313_0521					197480	3643.3		10955.8		1
Clo1313_0522										0
Clo1313_0523	15489.1		15375.1	134706			81040.9			1
Clo1313_0526	109250									0
Clo1313_0531		71730.1								0
Clo1313_0532	77174.4	7365.42	6036.22		4077.18	9035.52	22900	6424.58		1
Clo1313_0538					205433					0
Clo1313_0539	1.01105e+07	3.57622e+06	5.09734e+06	1.11322e+07	2.566e+06	1.59104e+07	1.39629e+07	5.65171e+06		1
Clo1313_0543							68474.6			0
Clo1313_0544						27938.9	93409.1			0
Clo1313_0545	30208.4		24007.4	123283			53289	12154.7		1
Clo1313_0547					82638.4	534112				1
Clo1313_0549	19956.4	23701.8	571840	3.36666e+06	93900.7	524838	1.70742e+06	625391		1
Clo1313_0551				129788						0
Clo1313_0552	807491	222698	1.81971e+06	2.1772e+06	664184	1.05975e+06	1.92164e+06	633846		1
Clo1313_0554	1.08284e+06	471885	57390.6	661345			62471.4	101545		1
Clo1313_0564			25663.8		5243.55		42254.3			0
Clo1313_0565			28615.5				41311.7			0
Clo1313_0567				35276.9	3955.01					0
Clo1313_0568	31034.6		105654	571614	29866.9	58524	363079	51864.6		1
Clo1313_0570			37945.9	24372.3						1
Clo1313_0571	28665.2		663968	1.76124e+06	446421	652099	1.09896e+06	636367		1
Clo1313_0572				544051	95782.9	278809		275118		1
Clo1313_0573			75722.3	127959	17239.1	33434.9	106223	119145		1
Clo1313_0575			6350.83							0
Clo1313_0578	5.08947e+06	4.85617e+06	1.01086e+07	2.94413e+07	1.87612e+06	3.97609e+06	1.28732e+07	6.57737e+06		1
Clo1313_0581	3024.61	92240.6		29681.9		25587.2		150563		1
Clo1313_0586	2.12226e+07	1.70466e+07	7.78363e+06	4.48093e+07	2.25914e+06	3.75472e+06	8.44653e+06	1.33378e+07		1
Clo1313_0587	4.43249e+06	2.08343e+06	1.8586e+06	354864			467144	45173		1
Clo1313_0588	155008		248210	211366			81029			1
Clo1313_0590	8146.52									0
Clo1313_0598	10490.7				12479.3					0
Clo1313_0599						4939.59				0
Clo1313_0600	145593	8493.31								1
Clo1313_0604							73819.8			0
Clo1313_0612					103677	45955.6				1
Clo1313_0613			40814.7		1.2736e+06	484278	95764.4			1
Clo1313_0614		73209						113061		0
Clo1313_0615	44003.1	182848	7658.84			52935.1	84214.1	34012		1
Clo1313_0616	279451	47781.8	110649		15315.6		312370			1
Clo1313_0617					33455.3					0
Clo1313_0619	30622	42037.2	21464.8	48736.7	45029.8	88342.9	203273	83970.1		1
Clo1313_0620							145718			0
Clo1313_0622					24589.3	182306	289041	57758.8		1
Clo1313_0623							52675.5			0
Clo1313_0626	96562.4	109773	142387	72536.6	92221.5	168183	263759	236333		1
Clo1313_0627	792304	232774	2.40742e+06	1.78228e+07	2.90797e+07	1.95429e+07	811120	7.17801e+06		1
Clo1313_0628	38459.5	29602.8	497432	1.3014e+06	4.00191e+06	2.34019e+06	1.54516e+06	1.72856e+06		1
Clo1313_0629	52456.9	25815.1	1.39981e+06	4.40806e+06	8.97039e+06	7.08109e+06	7.3759e+06	1.59775e+07		1
Clo1313_0630	252709	159131	3.53358e+06	5.92527e+06	5.88212e+06	8.3166e+06	1.27172e+07	1.47707e+07		1
Clo1313_0631		26091.5								0
Clo1313_0634		265.81			2005.26		11581.9			0
Clo1313_0635	10172		3022.64		38904.6	2904.88		631.879		1
Clo1313_0636	1.31727e+06	669393	884835	348566	329608	865996	2.36566e+06	1.12893e+06		1
Clo1313_0637	58251.1				126637					0
Clo1313_0638	5.89328e+06	2.22187e+06	5.24573e+06	5.41755e+06	2.15322e+06	1.7511e+06	7.3158e+06	2.70458e+06		1
Clo1313_0639						27054.5		98500		0
Clo1313_0640	234153	305397	74794.4	379695	59941.1	134913	464029	599342		1
Clo1313_0641	349302	117046	83097.8	116893	86019.4	252049	839441	446626		1
Clo1313_0642	3.299e+06	181997	3.06738e+06	592700	1.1712e+06	277168	8.78785e+06	265686		1
Clo1313_0643	1.63919e+06	1.00737e+06	4.10469e+06	4.85759e+06	3.38136e+06	9.52146e+06	8.83978e+06	8.38171e+06		1
Clo1313_0645	2.13496e+06	633087	1.0261e+06	453357	306373	207764	1.59865e+06	596967		1
Clo1313_0646	1.43978e+06	1.07338e+06	1.2546e+06	716229	311780	733747	1.6689e+06	1.21652e+06		1
Clo1313_0647	3.71747e+06	1.25407e+06	2.82962e+06	996474	1.06352e+06	832967	7.15476e+06	1.04697e+06		1
Clo1313_0648	156442	236157	237552	101044	57273.4	170684	287447	197949		1
Clo1313_0651	29301.4				60277.6					0
Clo1313_0652	211082	150654	237594	633322	1.19269e+06	73936.5	2.41115e+06	443906		1
Clo1313_0653						113908				0
Clo1313_0654	74938.7				3968.64					0
Clo1313_0655						34420				0
Clo1313_0656	1.46523e+06	1.44701e+06	1.69438e+06	1.63491e+06	1.23471e+06	2.33963e+06	5.26603e+06	2.34998e+06		1
Clo1313_0657	82709.6				55010.1		138563			0
Clo1313_0658			24666.8	14059.9	31207.7	99457.9	363988	59891.5		1
Clo1313_0660	72981.8	2309.04	17588.3		48027	7593.87	99652.4	21037.8		1
Clo1313_0661				25998.9						0
Clo1313_0663	20589.3	29287.2	45807.2	24158.8			254838			1
Clo1313_0665							71035.4			0
Clo1313_0666	16435.9									0
Clo1313_0667	110720	134440					69741.4			1
Clo1313_0669	69438.9									0
Clo1313_0671	690179	184488	87184.8		91818.1	316708	389804			1
Clo1313_0672	606075	135137	186351	125413	117529	92137.2	361319	167701		1
Clo1313_0673	2.58877e+07	1.30017e+07	3.42301e+07	1.55893e+07	2.81541e+07	1.21539e+07	6.30726e+07	1.64466e+07		1
Clo1313_0675	324535	103042	3.2106e+09	53941.1	493444	1.10957e+06	759082	288221		1
Clo1313_0677	6.99682e+06	3.92991e+06	4.55451e+06	2.64596e+06	1.04068e+06	1.83374e+06	6.55025e+06	3.70089e+06		1
Clo1313_0680				429.624						0
Clo1313_0683					6142.21					0
Clo1313_0684	474171	208209	402538	120024	718521	391134	726841	492411		1
Clo1313_0685					35081.2					0
Clo1313_0689						6207.54				0
Clo1313_0693						5362.05				0
Clo1313_0694	354809	357838	352862	506755	222770	896188	949078	604058		1
Clo1313_0696			11852.7							0
Clo1313_0698	153030	121859				146047	102827			1
Clo1313_0699	80882.8	18387.2	4664.48			66174.5	95361.7			1
Clo1313_0700	76743.3	172010	30107.4		31263.3	193726	88398			1
Clo1313_0701	112301	152411		27794	39741.5	629111	192252	156242		1
Clo1313_0706	1.97917e+06	759343	491540	801667	3.72671e+06	1.86234e+07	2.04998e+06	2.47829e+06		1
Clo1313_0707	2.1846e+06	2.48157e+06	1.9379e+06	1.38221e+06	52109.8	89725	5.16221e+06	979198		1
Clo1313_0708	3.11191e+06	940426	2.42332e+06	1.69877e+06	470249	258480	4.15067e+06	1.71893e+06		1
Clo1313_0709	1.08326e+07	6.2902e+06	2.24007e+09	5.11583e+06	3.65328e+06	3.03412e+06	1.26229e+07	5.48183e+06		1
Clo1313_0710	12735.7	16726.3	56558.2				66726.6			1
Clo1313_0713			193247		35064.8		90226.6			0
Clo1313_0714	1.36865e+06	1.4891e+06	813462	184213	1.54232e+06	1.77599e+06	595531	502460		1
Clo1313_0715	895604	498910	621718	209525	148871	138165	1.26212e+06	569333		1
Clo1313_0716	99612.6	66193.4	60553.3	23460.7	186672	417529	275937	169956		1
Clo1313_0717	1.2358e+06	455593	272678	71952.5	45898.1	55898.6	313897	74241.6		1
Clo1313_0718	712603	335742	92801.3	34464.4		105697	211318	69551.7		1
Clo1313_0719	78696.7	22240.1	8619.34			104240	140906	38531.8		1
Clo1313_0720	1.10155e+06	1.25406e+06	865490	1.3385e+06	1.54811e+06	4.907e+06	1.74979e+06	2.6851e+06		1
Clo1313_0722						193242				0
Clo1313_0727	7880.54									0
Clo1313_0729	1.03445e+06	222885	432091	120981	360040	82647.3	608028	189453		1
Clo1313_0731										0
Clo1313_0732	99226.8		38547.1		30900.4	48535.5	86379.9			1
Clo1313_0736					20137.7					0
Clo1313_0737	21804.8	16716.8			5280.91	16463.3				1
Clo1313_0739			171264	184614			19781			1
Clo1313_0740	397996	292096	354802	153152	558538	704533	923186	344723		1
Clo1313_0741		79997.1								0
Clo1313_0745	532480	357389	88279.3	223514	214887	906597	545330	835376		1
Clo1313_0749	5.75919e+06	2.79936e+06	2.3868e+06	1.23044e+06	993807	1.95274e+06	3.82493e+06	888227		1
Clo1313_0751										0
Clo1313_0754				6141.28						0
Clo1313_0755	31773	108905	26067	191161	73291.5	84086.8	116538	367549		1
Clo1313_0757	84944.9	37282.9	112030	111354	56977.4		131124	266618		1
Clo1313_0758	90970.4	27115.6	47484.1	52495.9	36723			42151.9		1
Clo1313_0759							135934	71587.3		1
Clo1313_0760					15742.5					0
Clo1313_0761	8325.74						2333.63			0
Clo1313_0762	29039.4	19235	27489.9	9481.95	37823.1		39116.7	29812.9		1
Clo1313_0765			62298.4							0
Clo1313_0778	13388.9	1226.07	5977.38		20125.6		8429.37			1
Clo1313_0779	84071.7	161435	156840	55617.1	67682.6	194346	427113	267019		1
Clo1313_0780	1.00291e+06	213420	349566	32143.1	314475	104685	652492	70755		1
Clo1313_0781	1.43092e+06	585982	1.02538e+06	13393.8	956993	95773.1	2.48936e+06			1
Clo1313_0783			1162.4		3174.41	6610.07	5793.13			0
Clo1313_0784					102613		2337.28			0
Clo1313_0786	119678			11215.4	38753.1		21976.3			0
Clo1313_0792					51337.2					0
Clo1313_0793	2.52287e+06	1.33192e+06	2.91781e+06	1.94738e+06	393777	569855	7.09969e+06	4.24408e+06		1
Clo1313_0795	75699.4	37669.3					111976			1
Clo1313_0797								5958.02		0
Clo1313_0799	4.10881e+06	1.49051e+06	1.1042e+06		24171.5		5.98938e+06			1
Clo1313_0804	28452.6	34035.3	17620	44356.6	84364.2	71749.6	41107.5	95741.9		1
Clo1313_0805	970619	426108	869311	492893	488164	240061	675630	334531		1
Clo1313_0810		81855.2								0
Clo1313_0815	6.47325e+06	4.41743e+06	2.24633e+06	4.61416e+06	198594	2.83655e+06	3.03514e+06	5.55489e+06		1
Clo1313_0817	313820	34008	205762	29300.4	59362.2	64234.2	569700	24844.3		1
Clo1313_0828								29175.3		0
Clo1313_0829	159075	6114.01	65152.6				196773			1
Clo1313_0834										0
Clo1313_0836	1.13847e+06	681450	213304	224228	169425	41633.2	727362	159261		1
Clo1313_0837	420950	104212	55019.2		59579.7		114114			1
Clo1313_0848	164316				176341	44764.4	319451			1
Clo1313_0849						29478.2				0
Clo1313_0850	32484.6	44342.8	133882			55761.9	45430.3			1
Clo1313_0851					107529	88103.7				1
Clo1313_0853	56491.4									0
Clo1313_0857	6.40894e+06	2.30826e+06	1.12446e+07	1.28767e+06	1.72041e+06	95676.6	4.38982e+06	562797		1
Clo1313_0860			26286.4			25958.2				0
Clo1313_0863	7.23877e+06	2.91556e+06	3.33592e+06	858664	9.84773e+06	3.80296e+06	4.90667e+06	1.67457e+06		1
Clo1313_0864	34138.6	16561.3	7973.53		321312	300618	27674.9	84207.5		1
Clo1313_0865	333119	244990	35237.5	12001.4	404483	531696	283545	137978		1
Clo1313_0867	3.33301e+06	1.76179e+06	2.64556e+06	1.36132e+06	2.76817e+06	2.70777e+06	5.92279e+06	2.13708e+06		1
Clo1313_0868	47144.8		16661.2		31507.9					0
Clo1313_0870	201543	471818	29486.4				73924.5			1
Clo1313_0872	740847	314923	385425	180226	34297.5	162733	414346	632756		1
Clo1313_0873	2.33534e+06	1.79187e+06	816044	1.37845e+06	340971	871477	1.29742e+06	1.99555e+06		1
Clo1313_0874		4966.96	1893.19	1436.62		4794.49				1
Clo1313_0875	252466	221738	31723.3	136187	408484	1.07764e+06	176412	18923.2		1
Clo1313_0876	473719	418704	100999	177352	292972	751358	192684	388611		1
Clo1313_0877								35399.3		0
Clo1313_0880	412905	268936	110020	50346.8	119562	239261	1.26475e+06	73561.7		1
Clo1313_0883	506664	684065	696346	1.24158e+06	408671	1.64603e+06	2.3012e+06	2.18094e+06		1
Clo1313_0884	850496	1.0391e+06	3.60968e+06	3.60222e+06	1.6913e+07	7.1242e+06	8.78148e+06	5.38678e+06		1
Clo1313_0886		10690.1				32864.5				0
Clo1313_0887	106973		60550		47145.3	256744	53489.7	185418		1
Clo1313_0889					12644.1	57446.8				1
Clo1313_0890	3.14625e+06	897947	1.11874e+06	716535	695801	1.76652e+06	1.91284e+06	1.54328e+06		1
Clo1313_0892	1.86643e+06	562863	873981	500354	312169	1.33823e+06	1.05707e+06	551185		1
Clo1313_0893	30495.8	14445.9	18434.9		27087.6	101884		63463.4		1
Clo1313_0894	10552.6		18350		14197.7	14072.5	34107.5			1
Clo1313_0895	19818.8		6992.77			30338.1				0
Clo1313_0896	253495	327409	94659.1		34700	103755	184312	46136.1		1
Clo1313_0897	223533	257829	68132	65031	72448.1	131801	145117	139268		1
Clo1313_0898	300438	178824	122172	87898.3		175720	101051	109410		1
Clo1313_0901	6.53412e+06	2.46145e+06	7.8326e+06	2.53187e+06	5.09006e+06	4.75469e+06	1.1539e+07	4.73735e+06		1
Clo1313_0903	417838	513524	256893	581008	529480	1.38972e+06	1.6609e+06	1.27743e+06		1
Clo1313_0904	22863.1	10422.5	7269.42		3208.41	95047.4	90917.1	8539.14		1
Clo1313_0905	1.07334e+06	481618	198457	133075			212145	116679		1
Clo1313_0906	87943.1	36057.6	10942.6	5153.77	18004.5	50894.6	137420	88269.3		1
Clo1313_0907		304575								0
Clo1313_0908	856596	880169	608848	301558	39485.2	212645	405633	207516		1
Clo1313_0909	8793.78	27065.4	10584.1				25459.1			1
Clo1313_0911	91489.9	35348.9	58549.8				93096.9			1
Clo1313_0912	94893.3	1813.08	101108				162340			1
Clo1313_0913	222338	209418	94481.2	102802	278501	306469	112629	13310.8		1
Clo1313_0914					8221.88	24689.6				1
Clo1313_0915										0
Clo1313_0916										0
Clo1313_0920	179428	98272.9		4018.79	78958.6			1440.73		1
Clo1313_0921						82087.8				0
Clo1313_0922	1.09891e+06	138363	176853	127811	146892	130252	659565	153426		1
Clo1313_0923	889191	548935	163953	137619	43261.8	444927	119791	268319		1
Clo1313_0924	47389.6							44298		0
Clo1313_0925	443846	405697	163743	88491.2	204573	8469.28	66825.4	8051.86		1
Clo1313_0929	179802	17296.4	159482	49418.1			89493.2	36163.6		1
Clo1313_0931		9769.15	116835				27349.5	17735.1		1
Clo1313_0932										0
Clo1313_0933	3.25821e+06	2.14984e+06	2.67358e+06	3.43575e+06	2.83308e+06	1.03366e+06	3.7179e+06	1.5845e+06		1
Clo1313_0934	248003	100346	230495	60876.4	73800.1	135183	378029	41658.5		1
Clo1313_0935	439468	114225	271194	43144.1	70276.1	215435	352306	253588		1
Clo1313_0937			12514.2							0
Clo1313_0939	288848	59136.4	135929	62708.3	131942	501010	1.12563e+06	190756		1
Clo1313_0940	3.82085e+06	2.75566e+06	3.85144e+06	3.98065e+06	2.45356e+06	4.51876e+06	8.69881e+06	5.81056e+06		1
Clo1313_0941	96823.1	15837.1	97244.6	143646		231760	241503	99815		1
Clo1313_0942	330542	242292	287531			648581	33614.3			1
Clo1313_0943	664102	165905	728087	508238	205795	377992	1.73063e+06	640513		1
Clo1313_0944	4.31006e+06	1.27765e+06	3.36197e+06	2.92626e+06	666018	2.2361e+06	5.26129e+06	2.92749e+06		1
Clo1313_0945	4749.14		68221.6	59566.3			412105	77601.1		1
Clo1313_0949	2.46229e+07	7.64189e+06	1.03465e+07	4.25821e+06	1.88737e+07	1.46023e+07	2.43143e+07	8.13857e+06		1
Clo1313_0950	5.00006e+06	5.07936e+06	1.7814e+06	1.44171e+06	1.04546e+06	3.29865e+06	4.44353e+06	2.98371e+06		1
Clo1313_0951			47605.5		26965.8		10851.2			0
Clo1313_0952	258744		617375	168820	251082	358445	806296			1
Clo1313_0953	176273	29869.1	44917.2							1
Clo1313_0954	113523	41680.9	43642.6		33777.4	26838.3	71839.1	18986.7		1
Clo1313_0955	1.3034e+06	279874	686552	120587	215875	435178	657146	241226		1
Clo1313_0960	34974.9		51235.8		31241.4	53814.9	97612.1	16316.6		1
Clo1313_0961	167219	118883	37892.6	6215.41			172066	19012.8		1
Clo1313_0962	36816.8		7860.57				46236.1			0
Clo1313_0965	224386	128418								1
Clo1313_0966	876657	347960	619514	1.0275e+06	282828	1.16768e+06	1.27244e+06	1.05573e+06		1
Clo1313_0967			24753.8							0
Clo1313_0968			7967.98							0
Clo1313_0970	226444	92757	287872	208495	87121.6	71465.8	1.05514e+06	170488		1
Clo1313_0971	30392	44271.6	4246.74				107354			1
Clo1313_0972	114691	83160.1	58105.1	39025.1	7784.66	186192	139447	73961.3		1
Clo1313_0973	17578.6	76383.7	13641.6							1
Clo1313_0974	3.69353e+06	1.43259e+06	1.41205e+06	503956	288632	604321	2.20671e+06	718682		1
Clo1313_0975	52719.1	36389.5	20553.3							1
Clo1313_0979	323298	39140.5	5561.38	33968.7			57537.7			1
Clo1313_0980						20699.1	153046	29604.1		1
Clo1313_0982	55839.9		50304.8		31864.2	64916.7	156643			1
Clo1313_0983	1.23886e+06	484039	397883	693328	267815	998961	929217	715015		1
Clo1313_0987					23203.4			49198		0
Clo1313_0988	353458	63554.1	205418	132802	22824.4	48622.1	447917	79343.2		1
Clo1313_0989	857938	198628	1.09334e+06	546130	139293	487181	1.72363e+06	591600		1
Clo1313_0990	11167.5	6826.24								1
Clo1313_0991	170960	154845								1
Clo1313_0992			16063				4893.28			0
Clo1313_0993	4.38627e+06	2.30813e+06	4.24876e+06	5.92124e+06	1.68401e+06	9.03251e+06	1.10922e+07	9.18469e+06		1
Clo1313_0994	224025	860.081	155774	10393.5	65666.7		181238			1
Clo1313_0995	111912	21774		14485		222568	181253	141454		1
Clo1313_0996			72738.7	7077.13	61734.3		287528	130441		1
Clo1313_0997	3.16313e+06	1.88446e+06	5.80899e+06	7.38658e+06	3.29359e+06	3.17819e+06	9.21627e+06	4.75154e+06		1
Clo1313_0998	38019.7		13773.7							0
Clo1313_1000	162381	785116	46279.8				153781			1
Clo1313_1001	1.422e+06	1.05566e+06	441062				495510			1
Clo1313_1002	3.02891e+06	3.41889e+06	1.34803e+06	78479.5	40098.6		2.80538e+06	225052		1
Clo1313_1005	58945.7	41291.4	77891.8	57330.9	24592.2	12155.3		120330		1
Clo1313_1006						513224		481948		0
Clo1313_1007	75599.7	81318.9	359086	580833	458066	1.02543e+06	2.51157e+06	1.82351e+06		1
Clo1313_1008	362483	31066.9	515268	1.08668e+06	927442	1.33391e+06	2.1103e+06	2.0051e+06		1
Clo1313_1009	846337	160810	3.77774e+06	1.73594e+06	4.04394e+06	2.63386e+06	8.47372e+06	2.84264e+06		1
Clo1313_1010	410920	25471	821420	635898	567889	464991	2.09892e+06	796351		1
Clo1313_1011		32492.9	421198	330779	371000	488998	1.14083e+06	727442		1
Clo1313_1012	6.32511e+06	3.14949e+06	2.12765e+07	2.48058e+07	1.55611e+07	1.97668e+07	4.19119e+07	3.26766e+07		1
Clo1313_1013	1.84881e+06	327217	5.77671e+06	6.15055e+06	3.47697e+06	4.73842e+06	1.41468e+07	5.57852e+06		1
Clo1313_1014	39391.3									0
Clo1313_1015					56359	69459.2				1
Clo1313_1016						22622.8				0
Clo1313_1017	170662	161140	136930	240643	94962.4	310087	224623	149186		1
Clo1313_1019								26891.1		0
Clo1313_1020	7.26746e+06	3.87704e+06	4.38925e+06	5.50432e+06	1.81324e+06	6.28444e+06	7.51929e+06	2.96738e+06		1
Clo1313_1021	37291.6			23962.3	1.23163e+06	645566	39980.3	147027		1
Clo1313_1024	664505	328324	288877	617112		78376.9	530758	611448		1
Clo1313_1025	642696	262142	159513	181307			161898	55351.9		1
Clo1313_1027	34656.3	28720.2	459034	238007	29352.5	442351	239024	196292		1
Clo1313_1029	4.60227e+06	1.9135e+06	1.67957e+06	1.62134e+06	645288	1.16088e+06	2.51462e+06	794488		1
Clo1313_1030	798308	234420	371827	700399		148823	934550	165232		1
Clo1313_1031			37385.7							0
Clo1313_1032	1.63168e+06	250044	332583	138537	141564	88878.4	499825	67678.3		1
Clo1313_1033	829192	1.03397e+06	168574	193965	38689.7	63917.9	606729	89891.2		1
Clo1313_1034	3.67709e+06	1.08717e+06	1.23273e+06	657381	622698		3.24138e+06	25427.3		1
Clo1313_1035										0
Clo1313_1036	189923	160653	11642.8	14485.8				30354.6		1
Clo1313_1040	407612	189996	87472.8	29515.8						1
Clo1313_1045	42053.7	237945	39366.8	236252	97448.4	10289.6	114553	99525.2		1
Clo1313_1046	2.0984e+07	9.8363e+06	3.44662e+07	2.55852e+07	9.97722e+06	1.50718e+07	4.30233e+07	1.46396e+07		1
Clo1313_1052	2.84131e+06	1.92797e+06	4.69173e+06	5.44114e+06	6.79192e+06	4.7378e+06	9.979e+06	1.62235e+06		1
Clo1313_1053		347093	152931	237690	239018	299252	290011	163472		1
Clo1313_1054	588718	1.45493e+06	1.60497e+06	2.58335e+06	323606	610772	6.45439e+06	262580		1
Clo1313_1056	214754	155455	77271.3	91739.9	285451	164665	637316	115925		1
Clo1313_1057	1.9629e+06	1.65486e+06	759060	472977	1.05422e+06	1.4013e+06	1.48663e+06	619533		1
Clo1313_1058	395024	128048	87234.6	27908.6	137930	54801.7	223385	8701.64		1
Clo1313_1063	101478									0
Clo1313_1065	106704	50628.1	59676.2	21360.7	193756	102532	33158.4	2281.53		1
Clo1313_1068	22332.7									0
Clo1313_1070						12017.5				0
Clo1313_1073	168903	36647.5	215674	94879.3	92108.5	52811.8	305017	73173.5		1
Clo1313_1074	193142		100400	150387	54004.9		271323			1
Clo1313_1076	422750	317445	88281.9	339187	171910	503354	152289	334535		1
Clo1313_1078	54428.9		28418.4							0
Clo1313_1081	337219	538156	287366	515288	162063	487233	1.14585e+07	280191		1
Clo1313_1082	293366	418432	249957	439071	204274	209449	549702	388864		1
Clo1313_1087	434796	109218	321836	207339	77363	85966.3	547889	159202		1
Clo1313_1089	466289	26887.3	205078	97294.7	104941		697477	52936.1		1
Clo1313_1090						8538.54		18593.9		0
Clo1313_1093		50553	28976.7	136345	156360	931308	136418	495213		1
Clo1313_1094						21488.3				0
Clo1313_1095			99896.3	23766.8		26896.7				1
Clo1313_1096	121276	92676.5	136972	250463	39673	135512	217016	96146.7		1
Clo1313_1097	18318.6		4760.5					46857.8		0
Clo1313_1098	224633	383847	174559	962147	147885	502287	1.05042e+06	963228		1
Clo1313_1099	561426	454171	395626	244330	106151	492040	1.13075e+06	226924		1
Clo1313_1103					73510.9					0
Clo1313_1106	7.42944e+06	4.26707e+06	4.30061e+06	2.14825e+06	1.50877e+06	44715.8	6.78018e+06	610405		1
Clo1313_1107	4.21626e+06	2.61707e+06	3.63282e+06	2.42002e+06	3.9758e+06	1.53319e+06	1.03631e+07	2.86437e+06		1
Clo1313_1108	600260	686058	640521	871711	1.11383e+06	960210	1.45264e+06	251918		1
Clo1313_1109	3.46413e+06	4.22411e+06	3.54194e+06	4.75207e+06	8.73203e+06	4.34189e+06	1.25326e+07	3.34469e+06		1
Clo1313_1110	293796	184206	184836	77583	347140	188693	369424	80224.8		1
Clo1313_1111	1.76884e+06	921425	1.16845e+06	1.29174e+06	1.41919e+06	946650	1.99938e+06	706977		1
Clo1313_1112	539097	769399	510231	678890	1.22954e+06	308806	751724	246128		1
Clo1313_1113					27262.7					0
Clo1313_1114	426085	209155	469802	305840	650662	314164	715130	73369.8		1
Clo1313_1115	3.05214e+06	2.58616e+06	2.36969e+06	3.87204e+06	3.55565e+06	2.02659e+06	3.90173e+06	1.45385e+06		1
Clo1313_1118	162172	11262.3	42705.1	14670.5	63256.3	14554	49242.1			1
Clo1313_1119	39867.8		29708.4	59058.6	154181	134240	101297			1
Clo1313_1120	3.34016e+06	1.8147e+06	2.12226e+06	1.79694e+06	1.23875e+06	5.01574e+06	2.88423e+06	1.50897e+06		1
Clo1313_1122	3.29862e+06	2.46024e+06	5.19495e+06	4.1799e+06	480282	1.9014e+06	3.47595e+06	2.23895e+06		1
Clo1313_1123			116006	14549.3	3363.95	91284	99235.5	24399.2		1
Clo1313_1124	1.89421e+06	2.165e+06	1.59107e+06	3.05471e+06	1.14623e+06	1.98514e+06	1.93273e+06	2.47349e+06		1
Clo1313_1134	16469.6									0
Clo1313_1135	149096	146899	558842	689328	540656	192216	1.21692e+06	141026		1
Clo1313_1137	96768.9				57589.9			35701.1		0
Clo1313_1138	64408.8	151633	96559.3	223249	12448.5	155232	269517	193760		1
Clo1313_1141										0
Clo1313_1142	246260	35222.3	201243	43586.6	87478.5		144135	23974.9		1
Clo1313_1143	108968	16445.8	153104	40140.3	52425.2	38227.4	123871	55508.4		1
Clo1313_1144	7052.59		82340.4		32171.5		10888.5			0
Clo1313_1145										0
Clo1313_1146	520482	33683.6	96749.6	111117		18439	172343	87992.5		1
Clo1313_1149			65084.1	254936				358806		1
Clo1313_1150	125294	49209.6	170232	95576.2	109162	143824	295113	242363		1
Clo1313_1151	415244	50650.4	364236	214248	153813	217406	672403	115659		1
Clo1313_1153	346981	319590	41399.8				130824			1
Clo1313_1154	262506	40994.2	115160	17264.9	132145	68902.5	218193	106841		1
Clo1313_1155	1.53973e+07	5.50588e+06	1.35932e+07	9.60139e+06	1.57971e+06	2.75087e+06	2.05911e+07	5.15951e+06		1
Clo1313_1156						1.41375e+06				0
Clo1313_1157		39396.2	12209.2	46553.5			27140.2			1
Clo1313_1159	238420	533019	403321	574469	123469	252404	969379	385303		1
Clo1313_1160	1.12162e+06	1.17595e+06								1
Clo1313_1161	113796	60036.5	271366	191501	31466.1	96045.3	657382	123305		1
Clo1313_1163	2.29323e+06	1.54894e+06	3.96228e+06	4.09933e+06	2.20936e+06	4.25799e+06	4.34258e+06	3.1031e+06		1
Clo1313_1165	128016	101516	47040	177630			146292			1
Clo1313_1167										0
Clo1313_1172	834329	301030	237195	272536	267116	321774	509291	466314		1
Clo1313_1174	1.69495e+06	422609	486798	452378		69725.8	1.03244e+06	397831		1
Clo1313_1176	31873		4324							0
Clo1313_1178	739957	307827	447094	797269	69977.2	446439	1.11751e+06	231667		1
Clo1313_1180			18890.5		22312.6	177088	176222	241453		1
Clo1313_1182						5977.75	40423.7			0
Clo1313_1183	99067.2	16508.9	6683.26	129711		49705.9	218220	31269		1
Clo1313_1185	5.10187e+06	1.69128e+06				10795.9				1
Clo1313_1186	1.53419e+07	4.51292e+06				26484.1				1
Clo1313_1187	401877		74106.8							0
Clo1313_1188	697250	331239								1
Clo1313_1189	38238.8									0
Clo1313_1190	216622	139627	11957.9	64041.5	14166.4	110151	44625.5	41134.3		1
Clo1313_1192	658408	358876	170910	425974	140057	1.11856e+06	412444	698118		1
Clo1313_1193	72563.3				17131.7	3784.53				1
Clo1313_1194	4.23574e+08	1.24814e+08	2.03117e+08	8.9009e+07	1.79613e+08	6.42718e+07	3.83685e+08	1.71086e+08		1
Clo1313_1195	2.79394e+06	930544	469490	1.06001e+06	161886	492078	2.03236e+06	935882		1
Clo1313_1196	1.02474e+06	155935	181758	144935	166461	63261.1	1.26658e+06	35610.5		1
Clo1313_1201	302330	60085.2	298400	137473	196146	61163.4	185704	72836.4		1
Clo1313_1205	528931	143487	80984.5	83061.9	49370.4	280256	112499	39755.4		1
Clo1313_1207	321504	134162	335357	335130	107343	992127	205729	541768		1
Clo1313_1208	177487	66514.6	18994.4	43497.3	8502.72	249729	101385	34322.9		1
Clo1313_1209	1.39407e+07	4.41023e+06	5.94272e+06	4.79624e+06	2.22923e+06	1.42381e+06	1.22512e+07	2.62174e+06		1
Clo1313_1210	2.31855e+07	9.19802e+06	1.43091e+07	1.67596e+07	9.43093e+06	1.26422e+07	2.23281e+07	1.15392e+07		1
Clo1313_1211	478287	42102.6				17022.4		9088.8		1
Clo1313_1212	8.93854e+06	4.29156e+06	5.90839e+06	4.35311e+06	2.84382e+06	4.34353e+06	5.81131e+06	3.25006e+06		1
Clo1313_1214	52520	31480.4	32240.5	28239	18402.6	187320	82860.6	125309		1
Clo1313_1216	158937	52303.2	33554.7	4347.67	13803.2		41493.5	6885.68		1
Clo1313_1217	96952.5	8367.1								1
Clo1313_1218	227806	67401.8	200783	14513.2		92043.7	249772	133711		1
Clo1313_1219	63884.3		54665.1		9099.52		18562.3			0
Clo1313_1221	436458	150271	312320	96222.5	41480.9	35711.1	420019	70917.7		1
Clo1313_1222	3.65954e+06	2.50918e+06	1.4047e+06	2.17639e+06	389400	875412	2.42441e+06	474062		1
Clo1313_1223			35796				105350			0
Clo1313_1224	34633.5									0
Clo1313_1225	5.30593e+06	1.55448e+06	2.67872e+06	1.58265e+06	970545	749375	4.00804e+06	1.55441e+06		1
Clo1313_1226	497514	689323	343836	626670	313807	352691	792103	433706		1
Clo1313_1227	384185	113963	109649	30275.6		63071.9	366142	93488		1
Clo1313_1228	18345.6									0
Clo1313_1229	31497.2	13660			11576.7					1
Clo1313_1231	69854	25781.1	20130.8	95917.9		7559.37		154901		1
Clo1313_1232	48108.5	14004.6	17677.1			8383.62	106762			1
Clo1313_1236			285503	529348	21682.2	296910	1.11073e+06	475213		1
Clo1313_1237	46779.6	58632.4	131021	166823	6264.81	65708	232013	84099.8		1
Clo1313_1239	53372.1	153453	23913.1	21640.8		28187.6		26008.1		1
Clo1313_1240	698396	452924	496531	600963	13600.1	553030	862126	295037		1
Clo1313_1241	156523	127799	152289	50779.6		158024	147658	77176.6		1
Clo1313_1244						46941.7				0
Clo1313_1246										0
Clo1313_1251						107137	21784	10387.1		1
Clo1313_1253	1.00171e+06	358296	415835	587487	1.10479e+06	256982	790622	282425		1
Clo1313_1254	3.32748e+06	1.69664e+06	1.34461e+06	1.20793e+06	3.7922e+06	1.09744e+06	2.2584e+06	1.07497e+06		1
Clo1313_1255	7.67089e+06	4.12666e+06	5.33297e+06	5.59091e+06	1.00725e+07	1.66341e+06	6.25862e+06	4.07029e+06		1
Clo1313_1256	88874.4	25251	9225.51							1
Clo1313_1257			4490.56		10402.8		142858			0
Clo1313_1258	342200		381206	24773	80730.4		395276	22381.3		1
Clo1313_1259	254014	216199	12010.8	297931		298492	280543			1
Clo1313_1262	193050	188189	218621	153385	499967	286489	679192	500820		1
Clo1313_1264	256188	269331	449589	810541	374286	836822	1.13263e+06	1.85717e+06		1
Clo1313_1265	810047	156566	651939	342401	1.21348e+06	489168	1.24844e+06	1.06413e+06		1
Clo1313_1266	620991	554976	871557	776810	935594	732664	1.07715e+06	1.07527e+06		1
Clo1313_1267	1.42511e+06	476700	2.03251e+06	750054	1.45565e+06	542297	2.36533e+06	1.18303e+06		1
Clo1313_1268	3.97896e+06	1.59806e+06	5.04076e+06	2.736e+06	5.85415e+06	3.04885e+06	8.61037e+06	5.45625e+06		1
Clo1313_1269	103704	108842	369990	197814	334655	206348	249073	220325		1
Clo1313_1270	365872	197870	541867	304563	607302	280513	576439	726238		1
Clo1313_1271	491019	304701	117157	144301	124307	64756.4	186328	105550		1
Clo1313_1272		2751.07			13974.2		28637.3			0
Clo1313_1273								26894.1		0
Clo1313_1275	342009	157661	275003	354373	50470	329717	531992	554334		1
Clo1313_1276	1.83556e+06			11678.3			62789.9			0
Clo1313_1279	254380	127317	265850	1.3448e+06	71139.1	40631.4	240040	296622		1
Clo1313_1280	579267	112543	400943	470388	464845	371983	742016	257395		1
Clo1313_1281	3.83541e+06	1.79001e+06	5.39414e+06	7.19555e+06	1.792e+06	1.94704e+06	5.50155e+06	3.15078e+06		1
Clo1313_1282	6.77768e+06	2.05834e+06	6.97476e+06	7.49795e+06	2.16634e+06	2.46599e+06	5.01678e+06	1.90358e+06		1
Clo1313_1283	3.03235e+06	2.55479e+06	8.31129e+06	1.55573e+07	2.15481e+06	4.21534e+06	7.3327e+06	7.4855e+06		1
Clo1313_1285	9.52748e+06	1.87628e+06	9.48929e+06	6.9524e+06	2.5377e+06	3.68862e+06	7.74732e+06	4.68941e+06		1
Clo1313_1286	210510		214870	154815	20711.4			29006.6		1
Clo1313_1288	438017	163204	380453	614500	256013	238565	419580	231710		1
Clo1313_1289		15783.5	2583.13			17585.7	20062.8			0
Clo1313_1290	92789.6	35506.9	32837.4	77998			134920			1
Clo1313_1291	427998	130001	249531	164792	65592.4	222746	494646	174053		1
Clo1313_1295	1.15343e+06	574493	1.26989e+06	3.16293e+06	1.04375e+06	3.83281e+06	1.58873e+06	2.35369e+06		1
Clo1313_1301	1.94216e+06	1.10704e+06	2.33271e+06	2.09334e+06	272259	658302	1.64927e+06	721479		1
Clo1313_1302	1.3898e+06	287962	1.37652e+06	1.07815e+06	221117	240068	1.07739e+06	609726		1
Clo1313_1303		3560.69					25967.7			0
Clo1313_1304	1.00199e+06	327336	552416	404098	158924	297092	1.06383e+06	228642		1
Clo1313_1305	260242	55864.7	339365	833325	1.7291e+06	501892	187954	1.98132e+06		1
Clo1313_1306			29893.5			8819.64		16029.1		0
Clo1313_1308	15934.4		39045.8		11845.3			18247.9		0
Clo1313_1310	28006.2		28953.7							0
Clo1313_1312	575419	113655	138403	107363	64884.9	508390	406567	329728		1
Clo1313_1313	136729	154159		148860	34208.3	609779	211360	227558		1
Clo1313_1314	7.3726e+06	4.57493e+06	3.3899e+06	3.90129e+06	1.22634e+06	3.66463e+06	4.48955e+06	2.51266e+06		1
Clo1313_1315	2.59399e+06	1.66922e+06	938844	671974	218662	1.14707e+06	1.2617e+06	304369		1
Clo1313_1316	193560	32247.1	1.54651e+06	473349	964748	162488	2.5803e+06	1.22183e+06		1
Clo1313_1317	285999	170349	1.07045e+06	1.02005e+06	707540	628361	3.3427e+06	1.56089e+06		1
Clo1313_1318	80556.2	11198.3	152011	463702	318076	124331	1.16175e+06	482870		1
Clo1313_1320	312239	147200	27714.2			7603.98		15118.6		1
Clo1313_1321		28984			19238.9					0
Clo1313_1323					11567.8		62966.1	20700.1		1
Clo1313_1324	719959	409951	1.02238e+06	377237	334808	216194	1.36262e+06	401148		1
Clo1313_1327			8807.58							0
Clo1313_1328	544857	69890.2	868173	127972	66041.7	177592	493687	162359		1
Clo1313_1329	970025	1.0511e+06		67333.2	24641.3		135677	44576.7		1
Clo1313_1330			67753.3	21944.2						1
Clo1313_1334	387558	71779.9	245770	130313	151628	339251	312566	120421		1
Clo1313_1335										0
Clo1313_1339			5013.62							0
Clo1313_1340	378433	87768.3	9123.93	12633.1	65035.6		43542.2	18455.5		1
Clo1313_1341	2.98036e+06	1.4637e+06	5.78822e+06	7.05747e+06	159587	99223.8	1.04691e+07	3.4567e+06		1
Clo1313_1342	2.0438e+06	846915	1.54055e+06	1.75902e+06	184223	1.36837e+06	1.6056e+06	1.17498e+06		1
Clo1313_1343						3885.38				0
Clo1313_1344	868832	650034	1.66656e+06	2.13734e+06	502803	555996	2.77414e+06	923161		1
Clo1313_1345	249078	47471.8	458716	413171	204328	49516	645728	144211		1
Clo1313_1346	634351	787446	3.23301e+06	3.68392e+06	2.52279e+06	858604	3.83672e+06	1.42944e+06		1
Clo1313_1347	602107	249614	722358	385694	272421	134271	1.34359e+06	235839		1
Clo1313_1348	88383.9		240319		66308.9		131535	85764.6		1
Clo1313_1349	1.94808e+06	1.25648e+06	4.43574e+06	4.28709e+06	1.08739e+06	2.47968e+06	6.13478e+06	3.43741e+06		1
Clo1313_1351		51614.8	197733	252215		176491	272618	186233		1
Clo1313_1352	1.17649e+06	788512	1.00939e+06	1.2062e+06	276810	725651	1.50946e+06	696115		1
Clo1313_1353	3.24461e+06	1.11515e+06	2.14192e+06	1.02333e+06	384334	538536	2.08374e+06	583850		1
Clo1313_1354	3.52184e+06	2.66232e+06	4.40264e+06	4.28957e+06	574462	3.35417e+06	6.10785e+06	3.53554e+06		1
Clo1313_1355	1.48496e+06	325131	961134	594187	174662	1.2306e+06	1.57107e+06	672928		1
Clo1313_1356	4.39431e+06	991207	5.98157e+06	1.8041e+06	951964	318410	4.17933e+06	437379		1
Clo1313_1357	653787	526120	3.69664e+06	3.78747e+06	298965	507684	2.21294e+06	1.30067e+06		1
Clo1313_1359							1.29563e+06			0
Clo1313_1361	188167	153889	260073	239986	102147	125363	549850	160116		1
Clo1313_1362	8.01205e+06	6.73763e+06	8.2388e+06	1.38924e+07	5.60387e+06	8.75982e+06	1.04713e+07	1.45832e+07		1
Clo1313_1363		37106.4		455968		67807.9	94342.6	292821		1
Clo1313_1364	8.91272e+06	5.04197e+06	4.32979e+06	3.5536e+06	1.48035e+06	1.29105e+06	4.49563e+06	2.91237e+06		1
Clo1313_1365		40407.3	29665.8	34815.4		15217.3				1
Clo1313_1366	75283.5	215134	90338.9	154235	34003.4	246931		97088.3		1
Clo1313_1367	51877.6	24453.7								1
Clo1313_1369										0
Clo1313_1371	70616.1	179418	119530	266598		161407	280630	274592		1
Clo1313_1372	151420	133837	336136	468601	81463.1	220108	712481	150926		1
Clo1313_1373	1.21268e+07	4.06633e+06	5.08338e+06	9.58439e+06	4.47243e+06	8.27507e+06	1.13251e+07	5.63511e+06		1
Clo1313_1381										0
Clo1313_1383						8259.03				0
Clo1313_1385	966034	316670	1.29084e+06	1.14985e+06	364145	908250	1.96925e+06	791393		1
Clo1313_1387		18336.6	21927.3	32519.4			81594.9	24719.2		1
Clo1313_1388			38097.2				71624.8	43069.6		1
Clo1313_1390	423613	33274.8	331936	443789	37833.6	239490	838275	298204		1
Clo1313_1393	42956			186560		10556.6	50681.3			0
Clo1313_1396					63905	56874				1
Clo1313_1397	198972	166085	170345	268861	172622	122661	171424	113605		1
Clo1313_1400					96876.5	440184				1
Clo1313_1401					293408	177197				1
Clo1313_1404	418224	221370	33320.4							1
Clo1313_1405	588348	100044	114775	133799	25073.9	507375	317552	377134		1
Clo1313_1406		38896.9		13299.3						0
Clo1313_1407	393736	234061	265329	384916	113154	634704	434754	418564		1
Clo1313_1409					304200	1.10185e+06				1
Clo1313_1410	1.43172e+06	688439	348003							1
Clo1313_1411	3.57673e+06	1.94492e+06	217084							1
Clo1313_1412	1.16535e+06	495171	41803.8							1
Clo1313_1414	5416.77	45274.1								1
Clo1313_1415			49730.4		14797.1		12752.8			0
Clo1313_1416	500880	129559	89026.4							1
Clo1313_1422					13518.6	27524.6				1
Clo1313_1423						23574.6				0
Clo1313_1424					118541	742442				1
Clo1313_1426						14612.6				0
Clo1313_1427	462300	338184	344099	252702	124251	373375	433008	233288		1
Clo1313_1428	55267.9	37090.7	4928.11	6106.13			69161.4			1
Clo1313_1429		87218.8	93071	125181	171029	301673	141665	283992		1
Clo1313_1430	86768.4		92246.6	103436	29883.2	284440	123892	99023.4		1
Clo1313_1433	55709.3		72911.9		135039	31551.9	152964			1
Clo1313_1434	3.07538e+06	1.3164e+06	2.43779e+06	1.27723e+06	578805	581671	3.19283e+06	1.66464e+06		1
Clo1313_1435	479339	318528	114564	86221	65395.8	112923	283948	176127		1
Clo1313_1436				93510.6	290429	228168	44715.2	191247		1
Clo1313_1437	195706	38978.6	309968	444803	15444.3	279627	583584	177168		1
Clo1313_1438	83585.6	48110.5	114636	238795	23266.9	331062	933826	342136		1
Clo1313_1439	1.49005e+06	316967	714797				11410.6			1
Clo1313_1440	44338.1		6415.44							0
Clo1313_1441			13412.4							0
Clo1313_1442	6272.9		12091.2							0
Clo1313_1443	164529	286329	13993.5							1
Clo1313_1444	930480	709006	538535	86585	82302.9	29438.3	582384	82610.5		1
Clo1313_1445	69666.1	92657.9	31114.9	65410.9	11539.7	6189.78	118238			1
Clo1313_1446	78954.2	35601.7	36630.7	29372.4	23095.6		189591	33528.5		1
Clo1313_1447							2220.86			0
Clo1313_1448	6.41411e+06	2.49783e+06	4.95633e+06	1.66431e+06	5.33443e+06	1.76402e+06	5.65849e+06	1.51017e+06		1
Clo1313_1449	144510	440665	267816	360994		6178.51	835768	297071		1
Clo1313_1452	403167	199515	366200	577351	59769	121696	645005	355739		1
Clo1313_1453	440258	216862	249301	269198	87660.9	22905.6	284069	116423		1
Clo1313_1454	2.23726e+06	695504	322623	773249	87792.4	343307	1.09495e+06	409550		1
Clo1313_1455						65391.2	54991.3			0
Clo1313_1457	3.21153e+06	3.85784e+06	1.08058e+06	2.55842e+06	454448	1.02632e+06	2.84829e+06	1.21099e+06		1
Clo1313_1459	7459.57		19572				48267.8			0
Clo1313_1460	129077	209264	222754	502824	97697.6	552920	544612	462661		1
Clo1313_1461			19914.4							0
Clo1313_1462										0
Clo1313_1467	2.30252e+06	2.11091e+06	3.30844e+06	2.90551e+06	3.31224e+06	2.12362e+06	8.63448e+06	4.36972e+06		1
Clo1313_1471	97988.7		16144.7			179143	98846.2			0
Clo1313_1472	723447	504345	639041	307918	194152	1.0279e+06	1.74789e+06	276570		1
Clo1313_1475	760617	534618	504071	408085	230547	857267	1.83048e+06	858900		1
Clo1313_1477				62545.8	722059	384586		166491		1
Clo1313_1478		13216.4			20059.3					0
Clo1313_1481	1.88153e+06	434848	1.16638e+06	479978	336131	975344	1.86052e+06	759485		1
Clo1313_1482	1.15268e+06	245545	448140	115667	91528		721977	90224.3		1
Clo1313_1483	31837.9	25267.4	73418.7		76037.3		73191.4	9678.96		1
Clo1313_1484			91994.6			30823.3	51194	22610		1
Clo1313_1486										0
Clo1313_1487						9270.41				0
Clo1313_1488			7964.59	22270.2	166950	23280.8				1
Clo1313_1491	6.26104e+06	4.88684e+06	8.15823e+06	9.34658e+06	6.88114e+06	1.95249e+07	1.67245e+07	1.56504e+07		1
Clo1313_1492	48950.1		121087	20442.5		48535.2	360378	6134.42		1
Clo1313_1493	176776	64305.7	47065	102396	58606.1	164373	92429.2	133536		1
Clo1313_1495	26563.2	266271	25238	72961.5			30385.7			1
Clo1313_1496		113041	80839.5							0
Clo1313_1497	1.59788e+06	499934	2.01233e+06	246056	392823	472162	3.06418e+06	504433		1
Clo1313_1498	598665	366232	797019	29878.4	138204		1.9614e+06	31615.4		1
Clo1313_1499	164460		134301		19501.7	62341.7	95762.2	24028.1		1
Clo1313_1500	2.40001e+06	588602	570312	244234	104225	201465	542440	307810		1
Clo1313_1501	125485	74287.4	345107	194842	163826	277128	1.00691e+06	191241		1
Clo1313_1502	5.97498e+06	1.51988e+06	6.40995e+06	2.54755e+06	3.24814e+06	1.39889e+06	9.07846e+06	1.53927e+06		1
Clo1313_1503	3.16591e+06	905699	4.9017e+06	2.06225e+06	2.0311e+06	957980	7.37537e+06	979996		1
Clo1313_1504		22247.5		18822.8				57514.6		0
Clo1313_1507	9430.69	95301	31342.3			15684.5	477787			1
Clo1313_1508	109807		177657		25637.5	30167.3	360002	30797.3		1
Clo1313_1509	69977.4	59334.4								1
Clo1313_1510	5.92639e+06	1.53036e+06	2.11634e+06	1.79821e+06	1.25072e+06	689469	2.81556e+06	1.50114e+06		1
Clo1313_1511	56011.1	39817.8		88881.5	36619.6	152002	172803	100198		1
Clo1313_1512	362111	437883	374145	517685	107874	639975	238815	236458		1
Clo1313_1513	807569	701752	97430.7	448713	333945	1.1392e+06	782461	1.01078e+06		1
Clo1313_1516	22150.4		9963.68			21135.3				0
Clo1313_1517	77624		31749.4		147141			64370.2		0
Clo1313_1518	112135	57429	123197	58188.7	168305	90346.1	226193	48853.3		1
Clo1313_1522										0
Clo1313_1523	2.59575e+07	1.65628e+07	2.20186e+07	3.03856e+07	6.52439e+06	7.76524e+06	2.6243e+07	1.68588e+07		1
Clo1313_1524	2.72339e+06	1.19995e+06	2.90189e+06	2.27321e+06	591351	371866	2.14584e+06	866318		1
Clo1313_1525		40713.9	36402.9	117084						1
Clo1313_1526	2.18541e+07	8.9901e+06	1.64919e+07	1.37689e+07	2.73542e+06	3.71626e+06	1.60157e+07	8.75375e+06		1
Clo1313_1528	22724					15538.4				0
Clo1313_1529	116957	110340	42488.3	69132.1	46423.4	188758		116484		1
Clo1313_1530	4.42704e+06	1.71119e+06	1.17994e+06	1.70866e+06	1.08494e+06	5.4317e+06	2.66797e+06	2.60899e+06		1
Clo1313_1531						49003.4		7803.67		0
Clo1313_1535	56994.6	9831.23								1
Clo1313_1536		14745.4				18456.8				0
Clo1313_1537	1.48099e+06	588829	490352	435069	94175.8	780596	1.12029e+06	1.00794e+06		1
Clo1313_1539							32781.5			0
Clo1313_1540	267138	321910	211135	364137	363905	356185	1.49122e+06	116685		1
Clo1313_1542	6.66699e+06	3.008e+06	7.44598e+06	4.48774e+06	1.50864e+06	2.51898e+06	1.09883e+07	7.15155e+06		1
Clo1313_1545	233406	30582.9	196649	31699.5	78878.7	200858	381315	75224.3		1
Clo1313_1546	502150	358743	253452	520154	105218	671030	303141	556259		1
Clo1313_1547	70830.4	72840.9			1.06724e+06	632964				1
Clo1313_1549	264637		860565	19596.9	152641	31260.6	471921	106976		1
Clo1313_1551	968118	262721	632713	237794	394393	673394	1.48557e+06	503702		1
Clo1313_1553										0
Clo1313_1558	830090	780411	661618	353199	346007	217112	693954	765174		1
Clo1313_1559	338584	107523	94578.8	35103.3	44771.3	29298.8	470988	169874		1
Clo1313_1563					42639.2	19268.2				1
Clo1313_1564					102144					0
Clo1313_1567	46787.2	33679.8	131402	8102.42	214920	371337	98242.7	140003		1
Clo1313_1569	1.31784e+06	715162								1
Clo1313_1570			15717.6					78636.9		0
Clo1313_1571	473877	72086.1				3.28178e+06				1
Clo1313_1572	128589						206483	193649		1
Clo1313_1578	1.37554e+06	995122	176282	67412.4	180909	610855	377589	190872		1
Clo1313_1580	992387	322422	75188.1							1
Clo1313_1581	1.2796e+06	288708	482463	304619	157001	188147	511276	365124		1
Clo1313_1587					6577.04	6995.01				1
Clo1313_1588	53460.3	38689.9			22905.2					1
Clo1313_1589	183369	88417.6	43596		197343	152997		126590		1
Clo1313_1590	6.08147e+06	5.37013e+06	3.87703e+06	4.90732e+06	4.25918e+06	1.98709e+06	4.62794e+06	2.92083e+06		1
Clo1313_1591		43206.7				44106.5				0
Clo1313_1592	53522.4									0
Clo1313_1593	108125		5402.05							0
Clo1313_1597										0
Clo1313_1598										0
Clo1313_1599	760135	491914	309067	305207	416417	304235	608883	351273		1
Clo1313_1600	53380.3	72867.7	92370.3	137714	122564	27447.9	297290			1
Clo1313_1601	104191	209704	36325.7	223108	148251	220035	209903	222299		1
Clo1313_1602	345325	347679	98489.7	163565	42387.4	263825	881455	196468		1
Clo1313_1603	52585.1		131899	535756	1.41527e+06	802925	32943.6	553463		1
Clo1313_1604					335150	58396.4				1
Clo1313_1606	1.52524e+06	582817								1
Clo1313_1607	907410	524393	451264	288945	56651.2	110331	855347	557386		1
Clo1313_1608	58548.6		73419.6		60283.3		82820			0
Clo1313_1609		30981.8		151385	177032			227903		0
Clo1313_1610	119690	65882.9	29576.5	172920	332535		74982	338822		1
Clo1313_1612	105964	67409	84223.1	45948.5	18973.7	30053.4	155315			1
Clo1313_1613	470600	1.56203e+06	1.15834e+06	1.22285e+06	580422	1.85419e+06	1.25535e+10	1.44029e+06		1
Clo1313_1614	6.12783e+06	1.94043e+06	3.55156e+06	3.07423e+06	1.97854e+06	3.88474e+06	9.1424e+06	4.19161e+06		1
Clo1313_1615	2.83423e+06	892720	1.38265e+06	1.15327e+06	555908	1.36327e+06	2.82893e+06	926675		1
Clo1313_1616	3.49976e+06	2.16939e+06	2.52726e+06	2.06611e+06	739588	3.09435e+06	5.26038e+06	3.66705e+06		1
Clo1313_1617	424791	43481.7	769604	185833	388362	182455	1.6115e+06	444658		1
Clo1313_1618	261783	218183	183208	169066	161447	201656	421957	155661		1
Clo1313_1619	13108.9		62479.8			80502.5	189368			0
Clo1313_1620	579573	54476.2	387479	68439.1	63993.2	156289	527453	222925		1
Clo1313_1621	52972.4	137609	91846.1	70201.2		135965	32812.1	8866.24		1
Clo1313_1622	52717.1	185651		67315.9	18079.5	140483	141184	87430.8		1
Clo1313_1624	49454.6	24756.7		40200.3						1
Clo1313_1627	2.48243e+06	697179	401269	688033	650336	1.13347e+06	2.11554e+06	546140		1
Clo1313_1628	803193	825148	77109.2	592412	182819	1.24018e+06	894855	1.00578e+06		1
Clo1313_1629				75978.7			23917.4	230800		1
Clo1313_1630	239279	379772	51563.5	334066	115464	592261	1.20496e+06	786457		1
Clo1313_1631	1.81344e+06	295282	537277	447568	582558	458400	2.15426e+06	1.08112e+06		1
Clo1313_1632	537983	71300.3	108378	64058.7	155686	54989.2	695262	104792		1
Clo1313_1633			116526		78987	253437	219749	95473.8		1
Clo1313_1637	238618	200374	102611		81521.9		100925			1
Clo1313_1647	9157.13				11737	11538.1				1
Clo1313_1653	53450.4				76207.6	56578.2	173976	56018.3		1
Clo1313_1654	196249					21915.1	163696	49560.1		1
Clo1313_1656	130062	35374.6	188451	33868.8	81276.4	86390.2	527195	139114		1
Clo1313_1657	5.12482e+06	2.0937e+06	1.8379e+06	1.88635e+06	612750	1.90746e+06	5.28397e+06	3.12798e+06		1
Clo1313_1658	157699	71007.5	318641	223222	68671.8	164342	474027	130941		1
Clo1313_1659	14697.4		17436.2	241371	2.57151e+06	290138		55487.5		1
Clo1313_1661	130748					96775.5		34989.4		0
Clo1313_1662			35119.9				53474.7			0
Clo1313_1663	1.28968e+06	465937	906613	706261	230879	288553	1.22292e+06	540254		1
Clo1313_1664	201238	24199.2	190395	55523.2	59479	216947	526382	73837		1
Clo1313_1665	221093	7010.82	61423.1	31742.6	163926		56925.5	7134.1		1
Clo1313_1666	143338	103052	199289	276798	25230.5	127302	254853	138963		1
Clo1313_1667	54763.9	65689	588028	345053		20909.5	585093	41794.7		1
Clo1313_1669	647975	331753	431047	282327	76590.4	425010	662332	260851		1
Clo1313_1670	666791	403809	240648	342951	66442.7		1.00977e+06	238417		1
Clo1313_1671	17625.8									0
Clo1313_1672	34567	39022.5	123026	53787.3	1.75713e+06		374031			1
Clo1313_1673	167474	150628	295246	73172.8	79507.5	231454	391346			1
Clo1313_1677	1.15952e+06	1.03604e+06	439633	529031	1.23756e+06	3.35916e+06	1.44153e+06	1.40643e+06		1
Clo1313_1678	541247	243143	100356							1
Clo1313_1682	2.22527e+06	1.57427e+06	1.71436e+06	3.21393e+06	2.08059e+06	7.55106e+06	3.09854e+06	4.69765e+06		1
Clo1313_1683	3.7721e+06	1.03909e+06	447849	537382	554816	4.02769e+06	2.51976e+06	1.71884e+06		1
Clo1313_1685	4.12381e+06	2.45035e+06	3.64626e+06	2.41785e+06	1.23949e+06	2.40139e+06	7.06726e+06	3.26152e+06		1
Clo1313_1686	4.56898e+06	2.56638e+06	5.0636e+06	3.98044e+06	1.41914e+06	3.18552e+06	1.1201e+07	3.22034e+06		1
Clo1313_1687	254924	184421	30911.5	453106	33500.9					1
Clo1313_1689	17949.9	41121.5	26974.2	79429.5	17155.7	63737.5	104557	66507		1
Clo1313_1690	94306.1	24048.2	42428.4	83966.5		116649	114379	140995		1
Clo1313_1694	36759.3	8947.77	91035.6	454325	1.27769e+06	473251		472824		1
Clo1313_1696	286249		161286	9115.91	104033	45227.2	217928	27007.7		1
Clo1313_1697					79378.1					0
Clo1313_1698	9500.25		9552.23			85267.2	198750	8975.5		1
Clo1313_1701			14006.1	497916	840150	598565	18541.1	489190		1
Clo1313_1712	678223		163080		963003		1.70367e+06	312489		1
Clo1313_1716	222673	41535.3								1
Clo1313_1717	9.67664e+06	6.32916e+06				8583.45				1
Clo1313_1718	19051.1	109745	147172	130069	8700.68	9273.38	49788.1	78496.4		1
Clo1313_1719						60323.9		134347		0
Clo1313_1720						135034				0
Clo1313_1722		9413.19		3248.63						0
Clo1313_1724	1.4679e+06	1.10192e+06	1.3586e+06	609542	74821.4	317607	2.50447e+06	1.02727e+06		1
Clo1313_1725	7223.6									0
Clo1313_1727										0
Clo1313_1728	260700	183952	177929				229137			1
Clo1313_1729	947472	729997	224775	121634			561372	255117		1
Clo1313_1730	2.61731e+06	696215	659663	43295.8	32311.7		1.50245e+06	291429		1
Clo1313_1731	415214	6514.6	107404				287053			1
Clo1313_1732	27503									0
Clo1313_1734	645887	481491	359050	89703.1			771829	3745.33		1
Clo1313_1735	385090	88165.5	13777				15135.8			1
Clo1313_1741	1.47959e+06	2.26151e+06	179424				1.41417e+06	700595		1
Clo1313_1742	1.08248e+06	472642	127662				149499			1
Clo1313_1743	279424	37666.2	76959.7							1
Clo1313_1744	21162.4	69016.4								1
Clo1313_1746	1.4258e+06	468799	149916							1
Clo1313_1750	236560	122060	8231.13			1959.08	21745.7			1
Clo1313_1752	131203									0
Clo1313_1753	96656.6									0
Clo1313_1754	518906	302221								1
Clo1313_1755	22948.7	125289								1
Clo1313_1758		31800.4								0
Clo1313_1759	241342	120284	63544.8	16370.6	165058	141965	55685.1			1
Clo1313_1760	430989	126049	97467.3		112428	258121	79504.7	50903.4		1
Clo1313_1761					144771					0
Clo1313_1762		38920.3	5151.59			50103.5				0
Clo1313_1764	425233	109434	138148	44054.8	252132	1.03371e+06	147331	11808.3		1
Clo1313_1765					10101.9					0
Clo1313_1768	258103	466597	17073.3				31572.8			1
Clo1313_1769	118792		112054		37454.9	41641.3	181585	59231.4		1
Clo1313_1770	162731	102340	443960	27550.1	128332	63725.3	422238	235764		1
Clo1313_1773										0
Clo1313_1774			96294.4							0
Clo1313_1775	4.01081e+06	3.63748e+06	2.57119e+06	2.50464e+06	1.12764e+06	825880	2.37329e+06	2.54795e+06		1
Clo1313_1776	43414.8	255532	100643	21008.8	5372.13		101155	315074		1
Clo1313_1778										0
Clo1313_1780	116173	131413	323614	331280	38320.9	354987	248090	457186		1
Clo1313_1781	202379	134426	368718	388746	142861	443267	538347	374864		1
Clo1313_1784		22102.8			37821.9					0
Clo1313_1785	73936.4				4029.09					0
Clo1313_1788	63309		144006	143326	487938	81318.7		127359		1
Clo1313_1790	1.12112e+07	3.66693e+06	8.4958e+06	4.0549e+06	2.18302e+06	1.15896e+06	1.41711e+07	1.71306e+06		1
Clo1313_1791	7.93272e+07	2.94505e+07	5.36341e+07	5.10709e+07	1.20945e+07	1.09355e+07	6.03037e+07	3.61444e+07		1
Clo1313_1792	9.93578e+07	3.26697e+07	8.27331e+07	4.69405e+07	1.86682e+07	1.09449e+07	6.45355e+07	3.30561e+07		1
Clo1313_1793	8.42407e+06	5.44538e+06	7.46479e+06	9.34665e+06	1.95297e+06	1.28646e+06	1.06415e+07	5.66708e+06		1
Clo1313_1794	1.34433e+06	187509	201728	67608.1	91961.8		86598.1	74911.1		1
Clo1313_1795	1.04983e+07	4.01459e+06	2.76238e+06	702790	94433.2	38932.7	2.77643e+06	1.03745e+06		1
Clo1313_1796	1.80973e+07	8.73104e+06	2.3688e+07	9.46407e+06	8.4713e+06	4.01005e+06	2.76056e+07	7.90456e+06		1
Clo1313_1797	8.28451e+07	5.1333e+07	1.02459e+08	7.29545e+07	2.9943e+07	3.38873e+07	1.15868e+08	5.8399e+07		1
Clo1313_1798	3.64667e+08	1.59319e+08	6.50426e+08	3.71249e+08	1.99427e+09	1.20212e+08	5.25491e+08	2.9615e+08		1
Clo1313_1799	4.79206e+06	5.88963e+06	2.51179e+06	5.89048e+06	2.03699e+06	5.25198e+06	8.84551e+06	8.18577e+06		1
Clo1313_1802	18336.5						9552.45			0
Clo1313_1803	8.2045e+06	5.41492e+06	1.94132e+06	2.63913e+06	877224	2.28302e+06	4.6806e+06	2.05926e+06		1
Clo1313_1804	2.91547e+06	2.22604e+06	911948	2.13326e+06	315795	517007	2.60107e+06	1.11599e+06		1
Clo1313_1808	3672.94			47128.8	768022	734217	20073.1	158849		1
Clo1313_1809	3.4415e+06	667038	1.26483e+06	6.83121e+06	3.13028e+07	1.00956e+07	634352	4.4678e+06		1
Clo1313_1810	303878	443679	124761	165134	247252	107158	507725	105601		1
Clo1313_1811	1.75983e+06	572442			79376.5	1.06e+06	1.78022e+06	474198		1
Clo1313_1812										0
Clo1313_1813	256307	138459	80042.3	15862.2			162458	52208		1
Clo1313_1816	14750.7	136965	10413.4		20231.5					1
Clo1313_1817		24778.7			6143.87	47020.8	15130.8	30688.6		1
Clo1313_1819	6.66481e+06	7.346e+06	1.0988e+06	204124	7.70186e+06	1.11686e+06	5.8865e+06	177606		1
Clo1313_1820	3.84695e+06	2.03787e+06	2.32365e+06	586496	429523	97709.3	2.28689e+06	432870		1
Clo1313_1821	221971		24928.3		32667.1		29032.3			0
Clo1313_1822	30624.1									0
Clo1313_1823	481825	335824	502799	256097		376522	578465	179348		1
Clo1313_1824	52255.2					41252.1				0
Clo1313_1825	156252			14803.4						0
Clo1313_1826					1.45425e+07	6.26377e+06				1
Clo1313_1827	1.34098e+06	413870	18907.8		4.2686e+07	2.0256e+07	488958	13872.7		1
Clo1313_1828	2.71362e+06	1.75117e+06	193464	411437	1.02933e+08	5.61759e+07	1.23403e+06	477133		1
Clo1313_1829					587294	857609				1
Clo1313_1830					3.04072e+06	3.41902e+06				1
Clo1313_1831			7.72622e+06	3.05539e+06	4.24288e+06	579632	1.96253e+07	2.66113e+06		1
Clo1313_1832			1.01605e+07	5.50365e+06	7.31621e+06	3.3167e+06	2.48094e+07	7.208e+06		1
Clo1313_1833	962647	140794	9.20479e+07	3.0218e+07	4.79159e+07	1.4658e+07	1.39209e+08	3.30697e+07		1
Clo1313_1840			25142.5							0
Clo1313_1846	3.04136e+06	1.5338e+06	3.50812e+06	2.07349e+06	404660	1.56063e+06	7.04578e+06	1.21562e+06		1
Clo1313_1847	7.71716e+06	5.49518e+06	9.80681e+06	9.33511e+06	2.69019e+07	1.03602e+07	7.66608e+07	1.67447e+07		1
Clo1313_1848	2.18381e+06	1.12491e+06	2.73517e+06	2.19121e+06	1.88295e+06	2.00386e+06	1.09154e+07	3.24711e+06		1
Clo1313_1849	2.38152e+06	1.37947e+06	2.88552e+06	2.25944e+06	1.37454e+06	2.74056e+06	8.43721e+06	2.7249e+06		1
Clo1313_1851	32580.7			24064.5		33624.5	237811	124134		1
Clo1313_1852	645833	106796	278986	56041.7	318328	432662	1.91503e+06	323716		1
Clo1313_1853	139371	169363	34182.9	143076	23237.5	316114	682340	255088		1
Clo1313_1854	12854.5	36911.7	2576.85	92681.6		351309	130348	323818		1
Clo1313_1855		110765								0
Clo1313_1856	132390		139001		42154.1	31126.3	153120			1
Clo1313_1857							47710.9			0
Clo1313_1858	973307		882586		57136.9		1.40277e+06			0
Clo1313_1859	187703		521059	1255.08	19584.7		907021			1
Clo1313_1861	2.33959e+06	1.92885e+06	493472	192129	99548.4	65936.6	1.16133e+06	233714		1
Clo1313_1862	7.94077e+06	5.83009e+06	9.50619e+06	6.39433e+06	1.37553e+07	7.28102e+06	2.20053e+07	8.61968e+06		1
Clo1313_1867	5.19189e+06	3.83487e+06	400632	385497	1.72944e+06	2.0744e+06	443379	606101		1
Clo1313_1873	264470	489103	290764	319282	589326	538279	875719	509869		1
Clo1313_1874	40086.4		15274.8	4702.76		41693.9	84120.1	51578		1
Clo1313_1875	7.09625e+07	2.88144e+07	1.03297e+08	8.67789e+07	2.85811e+07	4.15904e+07	1.49128e+08	2.8307e+09		1
Clo1313_1876	5.70084e+07	2.00761e+07	3.56341e+07	1.79983e+07	3.26504e+07	7.78188e+08	6.87943e+07	2.5638e+07		1
Clo1313_1878	1.33666e+07	7.28146e+06	1.20856e+07	1.15617e+07	1.41566e+06	6.33727e+06	2.02874e+07	9.52469e+06		1
Clo1313_1879	6.65305e+07	3.25643e+07	3.56433e+07	2.09356e+07	6.55638e+06	1.18484e+07	6.27733e+07	2.24023e+07		1
Clo1313_1881	6.72256e+07	3.29404e+07	2.37552e+07	2.45689e+07	1.70518e+07	2.24854e+07	3.89718e+07	2.80799e+07		1
Clo1313_1882	5.89208e+07	2.67208e+07	1.67851e+07	2.44526e+07	1.6121e+09	2.1893e+07	3.51722e+07	2.43481e+07		1
Clo1313_1883	1.58291e+07	9.31488e+06	3.5669e+06	6.47983e+06	3.54063e+06	4.84359e+06	6.12967e+06	6.31929e+06		1
Clo1313_1884	45217.4		15381.6		27374.7					0
Clo1313_1885	8.27622e+06	3.03443e+06	3.26518e+06	1.54888e+06	2.01785e+06	1.47102e+06	4.58961e+06	1.7446e+06		1
Clo1313_1887		775319		475780	39090.1	448524	356158	815784		1
Clo1313_1888	429437	159053	158754		149163	45137.2	394491	95999		1
Clo1313_1890	161450				83134.9		29109.1			0
Clo1313_1891	3.45655e+06	1.07571e+06	1.12188e+06	138609	371736	129128	1.08711e+06	245663		1
Clo1313_1892					79604					0
Clo1313_1895										0
Clo1313_1896	328617	25094.5	52240	54392.6	48723.8	360823	189352	39565.4		1
Clo1313_1897				82921.9	279564	688706				1
Clo1313_1899								219.882		0
Clo1313_1901	115716	39955.2	75608.8	12484.8	4003.65	119317	220936	15916.2		1
Clo1313_1902	3.18078e+06	891212	3.77903e+06	1.29846e+06	769239	956592	3.41949e+06	1.0063e+06		1
Clo1313_1905	36376.9	30094.3								0
Clo1313_1906	2.47776e+06	2.5806e+06	371787	254757	25900.3	84217.4	537649	444495		1
Clo1313_1907	562542	125060	168789				275195	39236.9		1
Clo1313_1909						119870				0
Clo1313_1910		56253.5								0
Clo1313_1912		6726.2		6996.27		18666.7		6275.05		0
Clo1313_1913	17194.1									0
Clo1313_1914	1.07211e+06	495335	159789	17118.1	39651.7	21528	121340	11848		1
Clo1313_1916	462181	366273	331983	165078	292885	1.15629e+06	411848	293546		1
Clo1313_1918	125863	259797	92854.8	196163	75152.3		41598.9	21443.1		1
Clo1313_1921	282690	120325	3610.55	138937	2216.07	95713.2	7387.58			1
Clo1313_1922	153621	192794	4326.23		50452.1	144218		40135.7		1
Clo1313_1929	2.46093e+06	1.28322e+06	110199	1396.19			2457.61			1
Clo1313_1931	6.61477e+06	2.34995e+06	2.55475e+06	3.35855e+06	1.41549e+06	1.91708e+06	2.47716e+06	3.14533e+06		1
Clo1313_1938	788850	772558	683801	529270	211835	873532	1.58222e+06	542663		1
Clo1313_1941			12433				21486.8			0
Clo1313_1942	1884.81									0
Clo1313_1944	2.21551e+07	5.7652e+06	9.97372e+06	6.14231e+06	4.19512e+06	8.58086e+06	1.42235e+07	1.12458e+07		1
Clo1313_1945	253452	241711	692994	664299	129950	601063	1.10663e+06	524010		1
Clo1313_1946	1.91976e+06	1.53172e+06	2.81996e+06	2.83729e+06	1.62939e+06	1.83254e+06	7.6548e+06	4.02177e+06		1
Clo1313_1947	1.38422e+06	741991	132136				34643.3			1
Clo1313_1950										0
Clo1313_1951						43427.9		45114.7		0
Clo1313_1953	602023	408268	212921	225400	65960.6	77307.2	521427	297791		1
Clo1313_1954	1.37029e+07	5.15924e+06	4.65305e+06	3.47943e+06	3.28893e+06	7.95719e+06	1.944e+07	8.06675e+06		1
Clo1313_1955					87212.3					0
Clo1313_1958				57336		292595	27357.4	129838		1
Clo1313_1960	1.5095e+06	789819	978906	1.24145e+06	4.08763e+06	2.4799e+06	571431	934396		1
Clo1313_1962							83581.3			0
Clo1313_1963	4.01259e+06	1.48338e+06	2.52435e+06	408462	239877	107582	3.80055e+06	267987		1
Clo1313_1964	1.16519e+07	6.44348e+06	6.90937e+06	4.05814e+06	1.18832e+06	4.27369e+06	8.70318e+06	7.85827e+06		1
Clo1313_1965						16660				0
Clo1313_1967	2.30209e+06	1.94086e+06	2.92919e+06	2.87067e+06	1.20304e+06	3.55793e+06	4.97947e+06	3.02948e+06		1
Clo1313_1969	1.04291e+06	508513	17299.4							1
Clo1313_1971		1652.33			531802	185970		63835.2		1
Clo1313_1972	521769	171833	54798.2							1
Clo1313_1976	117413	77185	210075	24930.4	148345	81372.3	438661	21460.9		1
Clo1313_1978						22309.7				0
Clo1313_1979	18883.3	57674	79377.8	110837	13576	188927	149785	154599		1
Clo1313_1980	66647.2	46577.1	35039.2	38065.3	3645.75	43120.9	96103.1	19495.4		1
Clo1313_1985	52707	124182	53553.6	357033		110415	116719	103379		1
Clo1313_1986	188575	81592.3	44119.8			11246.2		13160.4		1
Clo1313_1990					119807	37985				1
Clo1313_1992	880209	139316	425085		104041	62399.9	1.89254e+06	129294		1
Clo1313_1993	2.46576e+06	321924	941931	41933.9	1.0721e+06	220503	3.13048e+06	159821		1
Clo1313_1994	1.71358e+06	239045	21447.9		11235.9		112029	24475.8		1
Clo1313_1995	8883.96									0
Clo1313_1996	19401.9									0
Clo1313_1997	49038.2									0
Clo1313_1998										0
Clo1313_2004	86441.5	198633	60662.1	19676.2		53052.6	186965	83277.4		1
Clo1313_2005	426969	561766	303811	261948	17891.3	169561	1.00271e+06	176859		1
Clo1313_2006	154457	58022.6	20591.6	46641.9			504592	8738.3		1
Clo1313_2007						446.213				0
Clo1313_2014						10130.4				0
Clo1313_2015	1.21538e+07	8.08698e+06	7.20183e+06	5.98459e+06	3.75918e+06	5.696e+06	1.31899e+07	7.70168e+06		1
Clo1313_2017	8.02323e+06	2.28456e+06	1.40613e+06	1.23935e+06	781676	267783	2.07566e+06	981770		1
Clo1313_2018	3.26963e+06	866658	789078	521392	441608	138310	1.05123e+06	384935		1
Clo1313_2020	1.16279e+06	362939	868496	589045	60134.2	233736	2.31846e+06	593568		1
Clo1313_2021						20234.1				0
Clo1313_2023			64264.4				176200			0
Clo1313_2027			15178	6922.3		431758	28633.8			1
Clo1313_2028			9451.6							0
Clo1313_2030	20972.8		5762.89	30717.7	32416.8	22914.5	25770.9			1
Clo1313_2031	2.32533e+06	971448	1.3306e+06	1.86149e+06	3.08113e+06	1.19785e+06	2.52062e+06	625051		1
Clo1313_2032	68771.1		35753.4	811361	1.26265e+06		399737			1
Clo1313_2033			14423	226167	1.25128e+06		350109			1
Clo1313_2034				307681	1.03908e+06	26998.1	208186			1
Clo1313_2035	91806.3	85011.2	226276	6.42186e+06	5.23971e+06	225123	1.92476e+06	97126.6		1
Clo1313_2036	3622.7		15030	3.80127e+06	2.34524e+06	20306.2	744758			1
Clo1313_2038	127884	102363	253014	3.67072e+06	1.38081e+06	127547	1.32253e+06	172395		1
Clo1313_2040		127113								0
Clo1313_2043					40915.8					0
Clo1313_2044						43092.5				0
Clo1313_2045	848610	355713	231163	120575	179562	973600	526350	519883		1
Clo1313_2047	2.53664e+06	1.64535e+06	1.53244e+06	1.53052e+06	2.65002e+06	5.67164e+06	4.52504e+06	3.66208e+06		1
Clo1313_2048	356372	170981			48707		79235.5	253656		1
Clo1313_2049	240259	281781	426657	713883	750757	619655	1.37813e+06	879304		1
Clo1313_2051	357387	128079	72949.3	11587.3	46259.4	35615.3	96986.7	17645		1
Clo1313_2052		13906.4				96377.2				0
Clo1313_2053										0
Clo1313_2054	1.00969e+07	4.74331e+06	6.39186e+06	2.47773e+06	948088	889314	6.26694e+06	2.11264e+06		1
Clo1313_2055	1.4331e+06	576611	1.0073e+06	331717	111857	78653	1.78349e+06	309893		1
Clo1313_2057	65022.4		58962.1		71192.4	195836		90025.3		1
Clo1313_2058	413104	314592	72773.9	290579	12210.1	116574	222801	580033		1
Clo1313_2059	109825	199374		50184.6		76339.6		52009.7		1
Clo1313_2067	45230.6	44282.7	27060.6							1
Clo1313_2068	83163.9			9033.34		115619	41088			0
Clo1313_2069	547068	160319	206334	267975	91934.4	276502	341759	286999		1
Clo1313_2071	194225	99271.1	90254.3	95268.6	120827	218065	473052	245846		1
Clo1313_2072	1.85063e+06	1.62485e+06	306635	350571			645191	310241		1
Clo1313_2074	5.70912e+06	2.68218e+06	1.45499e+06	1.46271e+06	649578	752560	2.11778e+06	1.27984e+06		1
Clo1313_2076	58351.9	13712.8	39906.3		12275.3		99841.6			1
Clo1313_2077	99770.4	67464	70199.8	98594.5	68182.9	69638.7	342376	157851		1
Clo1313_2078	552767		213753		224714	148958	102083			1
Clo1313_2080	22514.3	176225	85827.4	84408.3			105654	177001		1
Clo1313_2081							123452			0
Clo1313_2082	40007.1	143991	63204.6	442699	131201	30925.9	603869	139493		1
Clo1313_2083										0
Clo1313_2084	2.99498e+06	1.97691e+06	1.57144e+06	4.61247e+06	1.13142e+06	3.40311e+06	7.00256e+06	4.12113e+06		1
Clo1313_2086			7758.87		28410.2	139733				1
Clo1313_2088	316546	757606	157309	749138	146919	2.39334e+06	839158	1.50737e+06		1
Clo1313_2090	6.42388e+07	3.97822e+07	5.39034e+07	3.45814e+09	6.44877e+07	7.25899e+07	3.01613e+09	5.4822e+07		1
Clo1313_2092	1.38185e+07	3.25499e+06	1.97241e+07	1.5466e+07	7.37847e+06	8.30226e+06	3.95828e+07	1.30956e+07		1
Clo1313_2093	4.58866e+07	3.08754e+07	2.82214e+07	3.44836e+07	1.17013e+07	4.33793e+07	2.61452e+07	3.66437e+07		1
Clo1313_2094	7.81499e+07	4.81121e+07	6.51541e+07	3.65328e+09	2.94308e+07	6.06522e+07	2.80361e+09	8.09161e+07		1
Clo1313_2095	1.86967e+08	1.35875e+08	3.07106e+08	3.16963e+08	6.38786e+07	9.65321e+07	2.94402e+09	2.26389e+08		1
Clo1313_2097	150456		9974.19	8097.69	200593		117634			1
Clo1313_2103										0
Clo1313_2104	108496		70689.8			86553.5	80480.2	197674		1
Clo1313_2111										0
Clo1313_2112	32258.1		46203.8		675645	1.65786e+06				1
Clo1313_2113					23058.2					0
Clo1313_2114	561141	179075	91462.2	108206		393160	302663	201069		1
Clo1313_2116	476782	272764	32611.2	188566		274220	206714	100113		1
Clo1313_2117										0
Clo1313_2118		12515.9				56124.6				0
Clo1313_2119	56783.2	10179.7	13546.1			97978.3	78981.9			1
Clo1313_2120	461201	182539	574839	212480	149361	200639	841034	253808		1
Clo1313_2121	638422	239468	146959	49175.5	163221	121354	758886	375211		1
Clo1313_2123	184161	102861	210409	263460	264995	317812	542114	926427		1
Clo1313_2124	1.73709e+06	432701	2.74628e+06	573788	2.61968e+06	1.23169e+06	3.58185e+06	786499		1
Clo1313_2125	1.6485e+06	462826	1.71979e+06	722672	973185	277503	2.54069e+06	670453		1
Clo1313_2127	762614	276166	694553	282343	548928	1.08009e+06	1.74141e+06	724837		1
Clo1313_2128	67115.7	21017.3	102634	73522.1	52336.6	148866	168990	259501		1
Clo1313_2130	5.88257e+06	3.58621e+06	7.15833e+06	4.24783e+06	1.25418e+06	3.09885e+06	8.9984e+06	5.75937e+06		1
Clo1313_2131	118352	223424	78047.7	350745	9639.3	101760	991288	311049		1
Clo1313_2132	92698.5	44791.2			25790.9	414803	77495.7	14382.9		1
Clo1313_2136	55929.5		82804.7	16837.7	97868.2		174448	8840.84		1
Clo1313_2137	360943	271907	142592		202800		311301			1
Clo1313_2138	6.79571e+06	3.31947e+06	4.76911e+06	3.42261e+06	2.32147e+06	1.63639e+06	7.1767e+06	1.59834e+06		1
Clo1313_2139	119431	27752.3	58395				135889	10447.4		1
Clo1313_2140	44435.6	81563.2	26147.7	47257.5			85205.6			1
Clo1313_2142		55155.4								0
Clo1313_2143	2.63809e+06	962360	3.29085e+06	1.6079e+06	768190	954824	4.58584e+06	2.68222e+06		1
Clo1313_2144		9890.07			32210.8					0
Clo1313_2146	32773.3									0
Clo1313_2148							101891			0
Clo1313_2149	1.37106e+06	862269	298362	349239	111549		1.09807e+06	31648.2		1
Clo1313_2150	1.93506e+06	534061	1.65605e+06	796431	682652	837518	3.36458e+06	540574		1
Clo1313_2151	226015	137554	176223				365094			1
Clo1313_2153	1.52186e+06	64656.2	105412		15160.8		484083			1
Clo1313_2154		30650.6				53891.5		271143		0
Clo1313_2155	265478	1.49224e+06	7934.15	81002.9	115239	2.23387e+06	1.18009e+06	6.88909e+08		1
Clo1313_2156							44734.9			0
Clo1313_2159			132257	341720	459792	1.47668e+06	122561	231113		1
Clo1313_2160			155377	155538		344890				1
Clo1313_2161	75355.8	34700.5	266859	37624.3	33092.3	144519	210630	362179		1
Clo1313_2162	4.01292e+06	1.62435e+06	2.27518e+06	1.66537e+06	541790	3.54407e+06	3.94188e+06	3.02781e+06		1
Clo1313_2163	743652	355580	297429	365954	305150	728035	712064	600572		1
Clo1313_2164	194038	172495	63982	300484		236328	213921	571697		1
Clo1313_2165	318174	22097.2	151263	80220.4	149192	152379	362268	176630		1
Clo1313_2169	1.95038e+07	4.16462e+06	1.67413e+07	6.05521e+06	1.24068e+07	6.63607e+06	2.66831e+07	4.95132e+06		1
Clo1313_2172		44353.1				25574.9				0
Clo1313_2173	10244.7	10243	14931.8		39088.9		25371.9			1
Clo1313_2176	24346.9			16789.3	1.04852e+06	940638	23350.7			1
Clo1313_2178	22726		18652.1	69639.5	37258.5	144640	36654.4	39793.2		1
Clo1313_2179	2.95792e+06	660043	1.51156e+06	1.09638e+06	402429	1.44349e+06	2.41192e+06	504614		1
Clo1313_2180	697836	371165	694022	339141	309166	234624	876266	398656		1
Clo1313_2184						532.942				0
Clo1313_2185		7960.27						6659.65		0
Clo1313_2186	61256.3	60750.2	67722.3	204405	670262	47668.5	231993			1
Clo1313_2187	279637	291722	304967	212786	1.41063e+06	189474	122723	210714		1
Clo1313_2188						2412.94				0
Clo1313_2189				28257.7	293755	44447.3		57487.9		1
Clo1313_2190	1.21663e+06	705514	2.10176e+06	1.07689e+06	349910	354581	6.88835e+06	1.62564e+06		1
Clo1313_2192		824811		1.06154e+06		1.15442e+06		1.64094e+06		0
Clo1313_2193	80266									0
Clo1313_2195	1.19081e+06	537825	150031				2664.83			1
Clo1313_2197	421099									0
Clo1313_2198										0
Clo1313_2202	142336				6325.75					0
Clo1313_2203		48039.7	7139.25	47131.3				64954.8		1
Clo1313_2204		1599.13								0
Clo1313_2208							273871			0
Clo1313_2213	508211	869301	833829	280457	284459	621488	703503	560749		1
Clo1313_2214						13374.7				0
Clo1313_2215	1.21411e+06	1.047e+06	2.57356e+06	4.9365e+06	1.23852e+06	865184	3.87402e+06	889592		1
Clo1313_2218		2199.55								0
Clo1313_2220	92319.2	120750	90946.5		32575.4		72182			1
Clo1313_2225	38700.6				14361.3		147955			0
Clo1313_2228	729324	577837	733056	638574	447747	744162	1.1717e+06	723906		1
Clo1313_2231	19583.1	116355	8120.95			133034		178575		1
Clo1313_2235	509338	422886	338720	1.31052e+06	629513	1.62562e+06	1.29164e+06	576336		1
Clo1313_2239	734078	890896	926456	901149	178133	1.74842e+06	2.69295e+06	2.58914e+06		1
Clo1313_2244			31623.6				120287			0
Clo1313_2246			66190.3	25175.8		139047				1
Clo1313_2247	6.21638e+06	3.35931e+06	5.60205e+06	4.61957e+06	6.84214e+06	6.14663e+06	1.34925e+07	5.97364e+06		1
Clo1313_2248	114000	82073.2		14965.7	13312.8	287032	268798	294697		1
Clo1313_2250	217668	136183	2515.19							1
Clo1313_2255		65609.3								0
Clo1313_2257	2.52784e+06	1.15811e+06	3.0128e+06	2.68154e+06	1.13995e+06	2.45005e+06	4.62584e+06	2.68829e+06		1
Clo1313_2260	94996	171444	254740	2.63651e+06			1.15422e+06			1
Clo1313_2261	30970.2	35893.9	29231.5	67054.3	9098.48		22080.8	3548.22		1
Clo1313_2262				27819.9			167578			0
Clo1313_2264	1.04976e+07	9.39022e+06	1.1182e+07	1.3755e+07	5.58898e+06	6.82223e+06	4.26891e+07	1.03729e+07		1
Clo1313_2265	9.62985e+06	5.25365e+06	1.01856e+07	5.85384e+06	3.79715e+06	3.90741e+06	2.1931e+07	7.2118e+06		1
Clo1313_2266										0
Clo1313_2270					257920	249124		14298.9		1
Clo1313_2271	445891	186968	158336	200492	1.15735e+06	188572	237308	67880.8		1
Clo1313_2272	171884	127533		33768.5		216478		63031.5		1
Clo1313_2273			54455.1				69212.7			0
Clo1313_2274		35204.6	15674.9				130399	39523.8		1
Clo1313_2275	15392.3									0
Clo1313_2276	83858.8	158815	12722.2	186904	77481.7	118361	280474	176669		1
Clo1313_2283						207536		14843.6		0
Clo1313_2285					29703.4					0
Clo1313_2286		1237.14								0
Clo1313_2287						15352.2		6259.12		0
Clo1313_2288						557502		216254		0
Clo1313_2289			37112.2							0
Clo1313_2290	2.93474e+06	2.91172e+06	847048							1
Clo1313_2291										0
Clo1313_2303	844112	498257	1.19285e+06	7.34122e+06	2.92522e+06	18054.6	3.75967e+06	776.383		1
Clo1313_2304										0
Clo1313_2305	30847.7									0
Clo1313_2306										0
Clo1313_2307	107656	59405.6	70228.6	8127.08	39789.6					1
Clo1313_2310	598137	163652	356549	131553	150378	198164	985696	310548		1
Clo1313_2312			4345.98							0
Clo1313_2318			20503.8				37669.4			0
Clo1313_2319	386442	669181	7.68468e+06	2.57907e+06	400067	179042	1.55615e+07	4.56941e+06		1
Clo1313_2321	1.09589e+07	2.74274e+07	1.00724e+08	6.71261e+07	1.76521e+07	1.10975e+07	3.84577e+09	9.68066e+07		1
Clo1313_2322		632839	566475	803065		74097.2	2.15312e+06	2.0583e+06		1
Clo1313_2323	1.32701e+06	1.62108e+06	6.26328e+06	4.07527e+06	485164	607970	1.08381e+07	4.42903e+06		1
Clo1313_2325	670172	3.04032e+06	262177	188880	3.68916e+06	803453	1.93602e+06	1.18898e+06		1
Clo1313_2326	1.29726e+06	1.27798e+06	283534	34261.7	2.9578e+06	447944	860789	549977		1
Clo1313_2328					47632.2					0
Clo1313_2330		1.26524e+06			47866.5					0
Clo1313_2331	490404	2.15776e+06	115437	88132.1	1.78637e+06		2.23284e+06	53992.7		1
Clo1313_2332	889374	2.71643e+06	471139	107596	2.58148e+06	29640.5	1.98868e+06	255152		1
Clo1313_2333					60320.1		41849.2			0
Clo1313_2334		51312.7			32934					0
Clo1313_2335	6.54583e+06	1.04435e+07	1.14274e+06	426321	8.23007e+06	66291.2	6.14406e+06	792617		1
Clo1313_2336	467807	6.62611e+06	581227	191583	4.69868e+06	30498.6	2.72545e+06	101990		1
Clo1313_2338	375193	513542			551373		97303.5			1
Clo1313_2339	1.68592e+06	5.48559e+06	927488	702906	2.35409e+06	415937	4.70093e+06	1.9243e+06		1
Clo1313_2340							238920			0
Clo1313_2342	184610	30825.1	297784	165718	12807.4		619850	426078		1
Clo1313_2349			12438.2							0
Clo1313_2353			42178.8							0
Clo1313_2359										0
Clo1313_2365							1569.22			0
Clo1313_2368				33973.7						0
Clo1313_2373			9652.04							0
Clo1313_2418		38031.3	48423.3		32272.1	158464	148342	7691.5		1
Clo1313_2421		16849.2	29501.2	5368.99	131762	20175		71682.2		1
Clo1313_2425										0
Clo1313_2428	136658	16295.5	13481.5			1.45643e+07	88052.8	558942		1
Clo1313_2429	1.39932e+06	1.38321e+06	1.16729e+06	1.31126e+06	373731	327757	2.62665e+06	617725		1
Clo1313_2430										0
Clo1313_2433	835807	34050.3	578076	90914	131240	592258	852773	217179		1
Clo1313_2434	78683.2	183379	16422.2	72684.5	11275.6	218547	144182	125989		1
Clo1313_2435	410726	320952	518681	571377	127173	50204.1	754438	81352.7		1
Clo1313_2436	59955.7	23247					80488.9			1
Clo1313_2437	25992.5	160294		34778.6	19761.4		157011			1
Clo1313_2438	80759.8		30726.3		26486.9		175857			0
Clo1313_2439	210504		61939.8	106770	7185.54	243028	799005	31269.5		1
Clo1313_2440	5.69609e+06	1.34012e+06	4.79943e+06	2.01885e+06	811759	1.66852e+06	8.58415e+06	2.44965e+06		1
Clo1313_2441	4.31549e+06	1.41474e+06	4.62222e+06	3.54932e+06	654870	1.80671e+06	7.70382e+06	3.1591e+06		1
Clo1313_2444	8.93259e+06	2.79863e+06	8.66565e+06	4.22863e+06	3.45315e+06	2.63974e+06	1.43235e+07	3.54258e+06		1
Clo1313_2446	195224	615215	32347.9	33913.7	38856.3	42934	153198	63273.8		1
Clo1313_2448							50232.8			0
Clo1313_2449	26250.1									0
Clo1313_2450	502133	243250	451821	379665	98443.4	461477	900943	326679		1
Clo1313_2451	376314	390891	138442		224953	93727.2	124742			1
Clo1313_2455	9.28429e+06	4.75045e+06	2.42811e+06	5.02059e+06	1.17735e+06	1.97968e+06	5.74265e+06	3.15368e+06		1
Clo1313_2456	6.66389e+06	1.32097e+06	2.94264e+06	1.16174e+06	2.20447e+06	1.22346e+06	4.00579e+06	990400		1
Clo1313_2457	407949	415084	529451	897945		81606	1.42922e+06	825379		1
Clo1313_2458							44500.9			0
Clo1313_2459	156167	23852	50316.4	54035.9	17500.3		316366	64109.3		1
Clo1313_2460	361425	43570.6	337864	215585	59779.6	38876	519016	89964.6		1
Clo1313_2462	5.9432e+06	3.51401e+06	2.80174e+06	1.89375e+06	2.99289e+06	854491	4.77157e+06	563117		1
Clo1313_2463	666353	613884	555178	923513	512266	945946	1.05597e+06	952827		1
Clo1313_2464	238430		50184.4		53187	87515	183227			1
Clo1313_2465	4126.1					10154.7				0
Clo1313_2467	2.79985e+06	2.00625e+06	1.15531e+06	40338	6.08145e+06	1.97365e+06	6.91164e+06	920196		1
Clo1313_2468	2.92685e+07	1.76188e+07	1.61792e+07	1.25316e+07	3.34291e+07	4.01431e+07	3.80108e+07	1.80428e+07		1
Clo1313_2469	466893	444225	683806	76343	699230	1.15844e+06	1.07715e+06	452954		1
Clo1313_2470	2.29578e+06	2.38406e+06	1.59391e+06	1.07928e+06	2.28068e+06	2.4065e+06	1.97147e+06	1.05594e+06		1
Clo1313_2471	291933	2074.7	54565.8		8768.7	342637	564060	53880.6		1
Clo1313_2472	22238.9					211281		26047.5		0
Clo1313_2474	20507.8		130296	218794	188755	185783	300856	386833		1
Clo1313_2475					5939.37	29991.4		24694.5		1
Clo1313_2476	92875.1	210542	84835.2	1.05215e+06	277165	537447	603074	950020		1
Clo1313_2478	159893	214562								1
Clo1313_2479			16966.6	14577	35474.1		55522.4	18402.8		1
Clo1313_2484	28221.5					24307.5				0
Clo1313_2487				15377.6						0
Clo1313_2490										0
Clo1313_2491										0
Clo1313_2492										0
Clo1313_2493										0
Clo1313_2494										0
Clo1313_2496										0
Clo1313_2497			59578.5	760002						1
Clo1313_2499	163635			33841.7						0
Clo1313_2500		4848.26				47845.3				0
Clo1313_2503					35964.8	125627				1
Clo1313_2505										0
Clo1313_2510				1379.68	3981.66	2062.38	1249.33	1373.76		1
Clo1313_2512					16197.6					0
Clo1313_2517			20290.6				8420.98			0
Clo1313_2518	213674	266063			31181.1		56047.9			1
Clo1313_2519	1.27762e+06	615855	142644	63762.6	775816	379357	345030	34680		1
Clo1313_2520					88556.2	16424.4				1
Clo1313_2521	28966.9				5918.38	3345.43				1
Clo1313_2524	60655.9	86409.3								1
Clo1313_2525	271961	178355	40352.9		35298.3	40255.8	23032.8	27910.7		1
Clo1313_2526	75142	104118	16462.7			58594.6		27002.7		1
Clo1313_2527				1081.23		697.037				0
Clo1313_2529			108832	358295	697012	1.38133e+06	719243	551541		1
Clo1313_2530	897104	169308	1.02913e+06	1.64844e+06	6.86915e+06	1.90859e+06	620832	1.18988e+06		1
Clo1313_2531	418158	159357	146946	100073	39666		102990	268742		1
Clo1313_2532	1.22409e+07	8.1148e+06	1.33393e+07	9.69716e+06	6.85521e+06	3.1205e+06	1.75339e+07	8.73234e+06		1
Clo1313_2533	931842	841503	391784	713582	213795	528780	1.5601e+06	593093		1
Clo1313_2534	1.41213e+07	5.95347e+06	7.15652e+06	3.97191e+06	5.04665e+06	3.97673e+06	2.21992e+07	4.79405e+06		1
Clo1313_2535	152085	58250.2	89339.5	24062.2		2473.05	379003	32227.4		1
Clo1313_2536	30316	39846.2	7589.33	154897				7029.52		1
Clo1313_2537	3.49051e+06	1.50667e+06	2.1574e+06	1.10525e+06	608712	1.35469e+06	3.97804e+06	1.40317e+06		1
Clo1313_2538	19019.1				41774.2	15756.5	62479.5			1
Clo1313_2539					35180	32563.5				1
Clo1313_2540	46399.5	39186.8	62192.5	70340.9	172661	251759	39919.5	70298		1
Clo1313_2544	218127	10978.4			138102	22847.8				1
Clo1313_2545	1.43504e+07	5.79246e+06	3.91278e+06	5.77561e+06	1.37935e+09	180096	5.05101e+06	1.40122e+06		1
Clo1313_2549	1.66151e+06	401914	1.13008e+06	591676	696007	1.3004e+06	2.29769e+06	749185		1
Clo1313_2550	117903	84174.1	128050	49734	33093.4		208158			1
Clo1313_2551			10411.9							0
Clo1313_2552	91924.4		47574.5		38588.8		87183.6			0
Clo1313_2553	215406	32756.2	149205	34032.8	126542	122816	752599	85462.5		1
Clo1313_2554	4.20892e+07	1.1092e+07	1.94101e+07	1.05559e+07	8.81065e+06	8.16275e+06	2.8533e+07	6.51886e+06		1
Clo1313_2555	933234	906258	215544	19677.6		18282.1	511098	105228		1
Clo1313_2556	1.66332e+06	513218	273818	100362	43727.4	64907.6	756071	91699.9		1
Clo1313_2557								36405.9		0
Clo1313_2558	6.93401e+06	3.66128e+06	5.42018e+06	2.25111e+06	1.55811e+06	1.12953e+06	8.35203e+06	2.01996e+06		1
Clo1313_2559	1.02418e+06	566586	183384	71439.8	60229.6	17085	1.51294e+06	164418		1
Clo1313_2560	6.66225e+06	2.01185e+06	810724	319704	108669	105210	1.88682e+06	343474		1
Clo1313_2561	4.19069e+06	2.7811e+06	2.47202e+06	1.26359e+06	564461	454408	3.69431e+06	1.36401e+06		1
Clo1313_2562	670161	601827	169658		9631.38		264035	324105		1
Clo1313_2564					171657					0
Clo1313_2577	58756.3		62201.7							0
Clo1313_2581			11708.1		8153.32		24951.9			0
Clo1313_2584	312567	313759	65454.9	64520	2.52895e+06	316963	211466	17644.1		1
Clo1313_2586	1.09299e+07	4.33846e+06	2.83393e+06	214167	1.06753e+06	438934	3.16698e+06	19477.5		1
Clo1313_2590	15386.7		27426.8		53431.5					0
Clo1313_2592	723316	343757	177417	39401.7	106071	187513	229806	309284		1
Clo1313_2597	1.69604e+06	586367	235317	281781	277309	1.8581e+06	468462	765535		1
Clo1313_2601	546620	228406	46090.9	146527		197420	409744	28173.8		1
Clo1313_2602	211210	100992								1
Clo1313_2603	238079	245850								1
Clo1313_2604	439551	246968	117252	229210	38172.3	327901	211776	191217		1
Clo1313_2606	3.0117e+06	1.01418e+06	2.24572e+06	2.42227e+06	158306	2.51994e+06	3.21467e+06	2.08633e+06		1
Clo1313_2608	249187	666951	310489	466814	34616.1	409546	774552	300861		1
Clo1313_2609	802700	404878	780228	443323	97957.7	480145	1.06394e+06	623616		1
Clo1313_2613	12539.9									0
Clo1313_2615	1.72333e+06	870243	2.09142e+06	590260	1.27566e+06	1.19055e+06	2.20865e+06	1.02208e+06		1
Clo1313_2616										0
Clo1313_2617	2.74455e+06	787539	914202	700667	720074	190174	753012	214827		1
Clo1313_2618	511710	254631	514870	211909	589425	852564	925960	190624		1
Clo1313_2619	214945	364170	702078	275845	732194	961516	1.79034e+06	682743		1
Clo1313_2626	387406	282257	65425.7	172534	63843.1	208515	321653	246195		1
Clo1313_2627	90177.3	63493.8				23329	31989.4			1
Clo1313_2628		6939.82						18384.7		0
Clo1313_2633	1.66972e+06	1.30028e+06	270885	131578	949098	1.2599e+06	371001	154151		1
Clo1313_2635	292037	182327	29646.5	41996.4	2.1103e+06	1.02004e+06	75157.9	173609		1
Clo1313_2637	6.66714e+06	6.09277e+06	2.42158e+07	1.03813e+07	3.76898e+06	7.66837e+06	2.16386e+07	1.02858e+07		1
Clo1313_2638	1.15224e+08	7.27872e+07	2.50665e+08	1.34566e+08	9.47981e+07	9.65804e+07	3.05505e+08	1.06522e+08		1
Clo1313_2641					50553.5	10601.5				1
Clo1313_2642	13119.7				38225.1			9423.43		0
Clo1313_2643	15934	23019.6		19011.8	935602	806272	63608	64524.2		1
Clo1313_2644		147048			258358	453229				1
Clo1313_2645					113138	114846				1
Clo1313_2647	23414.9				308194	37899.5				1
Clo1313_2648										0
Clo1313_2649						180370				0
Clo1313_2659				4280.11						0
Clo1313_2665	61241.8	32272.4	113556	16150.8	148538	52333	109675	89214.6		1
Clo1313_2671		2640.38								0
Clo1313_2677	30975.6	68994.3	80723.8	73882.6	66416.3	91635.7	119103	49523.8		1
Clo1313_2687				7803.56	24884.8	37257.1	4513.75			1
Clo1313_2689					22956.9	52200.4				1
Clo1313_2692		779894		313697		244946		1.04039e+06		0
Clo1313_2693				81085	764345	230778		55904.7		1
Clo1313_2694	88213.1	39115.7				14550.3	1045.06			1
Clo1313_2695	43773.7									0
Clo1313_2704										0
Clo1313_2705					40147.9					0
Clo1313_2706					54904.4					0
Clo1313_2707		12111.3	30869.1		411256	166663				1
Clo1313_2708					390873	72411.8				1
Clo1313_2709					48081.1	298356				1
Clo1313_2710	1.65736e+06		62179.5		240883	156017				1
Clo1313_2711					275582					0
Clo1313_2712					112858	13878				1
Clo1313_2714					461308	15663.3				1
Clo1313_2715	118020				108151	534596				1
Clo1313_2718	243018		103042		53576.2	70475.5				1
Clo1313_2722	2939.17									0
Clo1313_2723	1.67851e+06	1.11166e+06	1.52319e+06	1.67611e+06	923311	1.50979e+06	2.92911e+06	1.39145e+06		1
Clo1313_2724	124217	58275.9	192272	59855.1	154972	245563	462428	96879.8		1
Clo1313_2726	38080.7	6805.8	153191	171770	49191.8	141729	298984	242266		1
Clo1313_2727	118281		140397	122911	51108.3	190954	538800	178155		1
Clo1313_2728	528652	427076	60744	116876	30114.4	73014.4	358093	70874		1
Clo1313_2731	37604.8	56896.5	6314.09		151209	184212	103743	145820		1
Clo1313_2734	971533		712552		244000		1.44115e+06			0
Clo1313_2735					16155.3					0
Clo1313_2736	248804	91032.4	401800	131119	201651	201433	976928	235934		1
Clo1313_2738										0
Clo1313_2740	69005.9		18904.4	3585.89			65317.4			1
Clo1313_2743	375566	140088	74439.2	435891	15137.4	162010	466574	529546		1
Clo1313_2744	43823.8	12088.2	30942.3	23429.3			145608	21480.5		1
Clo1313_2745	18936.8		120955		44565.5		267192	22370.2		1
Clo1313_2746	71266.5	54791.6	30506.7	31415.7			162390	17455		1
Clo1313_2747	116800	7272.48	714273	3.89947e+06	3.00209e+07	1.66502e+07	2.4372e+06	7.21628e+06		1
Clo1313_2748	1.25737e+06	1.11811e+06	1.06413e+07	1.56713e+07	2.51882e+07	4.89492e+07	2.71149e+07	3.8477e+07		1
Clo1313_2750	68109									0
Clo1313_2751						20537.4				0
Clo1313_2753			72801.2	83465.2			161099			1
Clo1313_2754	3.92634e+06	2.2805e+06	3.48496e+06	1.98475e+06	4.00309e+06	3.09464e+06	6.73053e+06	2.74403e+06		1
Clo1313_2758	1.08581e+08	6.48526e+07	1.06598e+08	4.83658e+08	9.92856e+06	1.20062e+07	1.70886e+08	7.89241e+07		1
Clo1313_2759										0
Clo1313_2762	266524	205908	84148.2	140699	65790.1	74426.7	133612	136964		1
Clo1313_2763	29124.3	41153								1
Clo1313_2765	139756	16229.2			53896.5	54518.7	62425.4			1
Clo1313_2766			6215.92		9978.12	20598.6		25945.1		1
Clo1313_2767	123133		183177		77976.1		618998	406832		1
Clo1313_2768	438548	76665.9	120457				239670			1
Clo1313_2773						124136	173340			0
Clo1313_2775	669442	155510	149059	140993	146235	402369	984558	406059		1
Clo1313_2776	15539.1						76118.1			0
Clo1313_2777	232366	110024		69868.7	29735.8	166135	93110.2	197401		1
Clo1313_2781					36122.2					0
Clo1313_2782	51502.4		132035		161880					0
Clo1313_2786					15012.9	76014.2				1
Clo1313_2788	2.01332e+06	986942	8.73145e+06	9.77192e+06	1.98426e+07	5.3088e+07	2.3373e+07	2.44181e+07		1
Clo1313_2789	323351	239263	520500	1.13552e+06	1.17104e+06	6.28179e+06	1.43821e+06	2.98215e+06		1
Clo1313_2790	77206.9		131413		54579.6	2193.62	268981	9013.34		1
Clo1313_2798						27420.1				0
Clo1313_2800	20487.2	36751.2				89140.5		11063.8		1
Clo1313_2801	1.536e+06	635554	420971	1.00282e+06	167137	361986	875877	790356		1
Clo1313_2805					24878.7					0
Clo1313_2806	82535.9	51140.2		7225.31	17071.6	64216.4	63424.8			1
Clo1313_2807	553192	346971	259964	127370	146299	175357	524369	260511		1
Clo1313_2808	127867		65305.1		33029.9		106029			0
Clo1313_2809	138081	148721	41451.6			201369		27664.9		1
Clo1313_2812		33041.6		12389.4				1033.01		0
Clo1313_2815	35397.7	59666.4	132689	118573	901483	1.79904e+06	298488	721616		1
Clo1313_2816			104097	4052.24	116292			54793.5		1
Clo1313_2819	37799.6									0
Clo1313_2821	1.08777e+06	440154	392268	59421.4	22021.7	124655	195819	81035.4		1
Clo1313_2825	238132	163463	85588	77567.6	57977.4	86945.4	472849	131276		1
Clo1313_2827	95122.3	53817.6	23443.2		29380.9		48569.4			1
Clo1313_2830	243555	26899.6	31523.1	9050.03	257312	606667	100155	13976.7		1
Clo1313_2831	1.0175e+06	485031	475240	484483	164640	78093.5	1.33686e+06	371095		1
Clo1313_2832	1.31081e+06	1.12239e+06	1.28341e+06	1.50804e+06	503797	907032	4.4993e+06	1.74899e+06		1
Clo1313_2845	26569.4					18512.6	65939.7	99924.9		1
Clo1313_2846	629110	705217	692825		55365.4	40135.8	646211	36313.4		1
Clo1313_2847	2.83385e+06	2.29327e+06	1.70303e+06	1.4219e+06	2.06356e+06	6.18602e+08	5.33056e+06	4.44231e+06		1
Clo1313_2849	2.56251e+06	2.1436e+06	722063	1.98664e+06	278815	836778	1.68455e+06	1.12878e+06		1
Clo1313_2850	1.05515e+06	191810	49034.9	86470.8	28104.9	84962	463616	49580.5		1
Clo1313_2851	8.95068e+06	4.75224e+06	2.57007e+06	3.80922e+06	2.10004e+06	2.51939e+06	6.57981e+06	2.9159e+06		1
Clo1313_2852	1.44579e+06	965970	1.83426e+06	875011	799881	518516	3.2434e+06	1.46824e+06		1
Clo1313_2853					13355	43405.1				0
Clo1313_2854	1.07425e+06	93205.1	41795.7	12365	40901					1
Clo1313_2856		8772.13	27203.7	377964	107066	104451		262630		1
Clo1313_2858					9281.05					0
Clo1313_2862								36177.7		0
Clo1313_2876	1.10271e+06	142834	904163	186157	177765	583408	1.17749e+06	495938		1
Clo1313_2881	7.66586e+06	5.10735e+06	7.39746e+06	6.2896e+06	376474	893708	1.26871e+07	4.33413e+06		1
Clo1313_2882	1.03589e+07	4.03654e+06	2.41942e+06	1.79829e+06	1.9358e+06	2.95785e+06	4.41071e+06	2.26782e+06		1
Clo1313_2883	1.65187e+07	6.25056e+06	6.09962e+06	3.66094e+06	2.81927e+06	2.17263e+06	6.43785e+06	3.19899e+06		1
Clo1313_2884	1.94169e+07	7.99722e+06	4.76847e+06	4.59189e+06	3.04852e+06	2.14255e+06	8.35875e+06	1.77923e+06		1
Clo1313_2885	18354.9		98688.9		85652.9	21215.1	272623	53811.6		1
Clo1313_2888	170821	239400	31048.1	28242.1		46701	143606	397318		1
Clo1313_2891	116135	768946								1
Clo1313_2893	1.6472e+06	1.05792e+06	207158		22468.9	140906	269921	92035		1
Clo1313_2894	214733	45688	27474.2							1
Clo1313_2896	199062	89355	83191	5891.91		18861.9	18142.2	22330.9		1
Clo1313_2897	749173	247936	45356	111724	14530.6		466105	35906		1
Clo1313_2898	35138.6	8323.41								1
Clo1313_2899	110510	37169.7	10704.9							1
Clo1313_2901	64554.3		17275.1							0
Clo1313_2902	1.98354e+06	544033	229064		8472.12		38292.6			1
Clo1313_2903	205432	115177								1
Clo1313_2904	1.59833e+06	570323	166631							1
Clo1313_2905	859747	448408	51815.5							1
Clo1313_2906	513146	114687	31407.5							1
Clo1313_2907		16287.8								0
Clo1313_2908	131009	5113.07								1
Clo1313_2909	7.53429e+06	5.02556e+06	151403			259760	25259.6			1
Clo1313_2910	6.2222e+06	5.87028e+06	245013			249931				1
Clo1313_2912	89861						81865.8	7930.92		1
Clo1313_2913	559745	156702	86381.4			5806.22	61631.4			1
Clo1313_2915	52988.5	202472								1
Clo1313_2916	84438.4	48061.8								0
Clo1313_2917	54070.7	62220.3								1
Clo1313_2918	950274	48192	39030.3							1
Clo1313_2920	107956	59751.9								1
Clo1313_2924	3.9518e+06	1.37439e+06	286405	776733	1.94329e+06	1.63311e+06	2.1202e+06	1.03673e+06		1
Clo1313_2925	363254	704399	53525.7	574086	93006.4	1.53619e+06	860257	1.35176e+06		1
Clo1313_2926	3.22692e+06	1.36988e+06	1.59346e+06	923746	699199	462839	2.65673e+06	435679		1
Clo1313_2927	2.66601e+06	622929								1
Clo1313_2929	107731	51502.1	28859.3			44290.7	70601	37210.8		1
Clo1313_2930	1.83616e+06	765009	691576	478198	366275	737562	2.70795e+06	793276		1
Clo1313_2931	9398.35									0
Clo1313_2933	386737		185685		88542.3	99617.9	285700	67559.4		1
Clo1313_2934	202971	199831	19265.7	30062.7	36567.8	16019.4	149695	20417.8		1
Clo1313_2935	1.06206e+06	1.36291e+06	410030	338166	79689	171986	933630	279726		1
Clo1313_2936	2.65368e+06	949111	1.05221e+06	83799.8		78352.7	1.12359e+06	94198.2		1
Clo1313_2937	1.78967e+06	990402	258798	392064	75620.4	185867	1.13726e+06	277564		1
Clo1313_2938	1.54877e+06	535378	707171	417445	110215	160890	1.04482e+06	312685		1
Clo1313_2939	344668	268874	134304		68956.4		297333			1
Clo1313_2940	1.48828e+07	7.42475e+06	6.65807e+06	3.34739e+06	2.31354e+06	1.39038e+06	1.04173e+07	2.52519e+06		1
Clo1313_2941	7.5459e+06	2.83743e+06	3.88943e+06	809770	1.00327e+06	433462	5.14512e+06	928181		1
Clo1313_2942	928490	146227	451878	196730	135684	117608	304345	109395		1
Clo1313_2943	3047.46		31055.3		5970.56					0
Clo1313_2945	22433.3									0
Clo1313_2947										0
Clo1313_2950	47443.7		141376	22942			386061	16739.1		1
Clo1313_2952	1.39468e+06	258608	1.64651e+06	242354	14689.4	53855.1	1.02369e+06	584573		1
Clo1313_2954	301063	131594	161655	34184.7	25674.9		259666	61917.2		1
Clo1313_2955	55551.3	42479	11423.6							1
Clo1313_2957	7.57419e+06	8.03188e+06	348631	116953	14561.2	24916.3	2.83341e+06	118347		1
Clo1313_2958	2.0778e+06	1.68841e+06	382092	25378.5			820186	26658.7		1
Clo1313_2959	184520	153731	92040.9	298962		5569.37	201126	43131.6		1
Clo1313_2960			14751.2							0
Clo1313_2970					51578.6					0
Clo1313_2971					108315					0
Clo1313_2972					23117.9					0
Clo1313_2973					244236					0
Clo1313_2974	63965				3.78625e+06	697594		47140.6		1
Clo1313_2975					2.20328e+06	198033				1
Clo1313_2976					37761.5		11689.7			0
Clo1313_2977	102062	102703		90860.8	24130.3	119696	157170	59691.4		1
Clo1313_2980	2.24824e+06	1.48281e+06	401374				191462			1
Clo1313_2981	1.91488e+06	233746	719740				132521			1
Clo1313_2982	27672.1		48597.9				49188.4			0
Clo1313_2983	2804.18				213424					0
Clo1313_2984	773639	1.33297e+06	441487	1.39108e+06	125366	1.8339e+06	870095	3.84711e+06		1
Clo1313_2985	274949	314592	311569	273833	332289	551608	598304	565898		1
Clo1313_2986		4029.06								0
Clo1313_2989	284287	236272	193432	224432	106249	506195	896283	507701		1
Clo1313_2991			11282.7		24548.8		69755			0
Clo1313_2993	14950.2	54313.6	19608.8			22240	184185	22599.2		1
Clo1313_2994	682676	628248	123430		82697.7		288641	280175		1
Clo1313_2997	115623	56083.7	86767.9	43696.7	21405.3	41690.8	26095.9	6212.49		1
Clo1313_2999	44990.5									0
Clo1313_3000										0
Clo1313_3005		8660.35								0
Clo1313_3007										0
Clo1313_3008	85049.8		102036							0
Clo1313_3009	299743	103611	213306	231925	25099	100569	264152	353743		1
Clo1313_3010	150544	18281.1	112152	3434.66		12062.5	83674.9	117574		1
Clo1313_3011	4.1977e+08	2.78521e+08	1.99147e+08	1.21543e+08	1.96482e+08	1.51441e+08	3.8118e+08	1.72909e+08		1
Clo1313_3017	627401	541461	220824	302607	7411.53	148169	1.34222e+06	494360		1
Clo1313_3018	129019		19076		17533.1	39085.6	356728	6287.76		1
Clo1313_3019	436717	217607	456927	46996.4	119213	205995	1.42423e+06	213538		1
Clo1313_3020	1.27066e+06	673810	993202	2.29231e+06	2.04505e+06	4.38108e+06	4.12548e+06	3.11012e+06		1
Clo1313_3021	6225.7									0
Clo1313_3022		8724.57		8742.43	62789.4	55414	186683	76751.3		1
Clo1313_3023					184715	79722.2				1
Clo1313_3024	2.52949e+06	1.07075e+06	651907	167940	299446	349726	1.68261e+06	312119		1
Clo1313_3025										0
Clo1313_3026	18728.1		17195.2	187698		140540	56700.1	235514		1
Clo1313_3027	679579	92054.4	175150	345788	81784.3	412616	1.3489e+06	197789		1
Clo1313_3028	81350.7	14957.1	45558		27801.5	42007.5	51588.4	5413.82		1
Clo1313_3029	1.32072e+06	405220	580060	818315	224687	381695	1.1655e+06	630496		1
Clo1313_3030	651324		122753							0
contam_gi|136429|sp|P00761|TRYP_PIG	7.16008e+06	7.02963e+06	7.5132e+06	1.01683e+07	6.96094e+06	1.27727e+07	1.32678e+07	1.27769e+07		1
contam_sp|P04264|K2C1_HUMAN	122352	118751	169809	110712	191788	357932	852523	218819		1
contam_sp|P05787|K2C8_HUMAN							39960			0
contam_sp|P13645|K1CJ_HUMAN	87543.4	47709.3	128912	1608.23	81259.6	56596.6	335673	110371		1
contam_sp|P13647|K2C5_HUMAN				3871.31				2333.82		0
contam_sp|P48668|K2CE_HUMAN							3054.27	22164.7		0
contam_sp|Q99456|K1CL_HUMAN							265862			0
std_gi|2190337|gnl|PID|e321614	24756.7									0

## Sheet: Quantifiable_Proteins
			Normalized Protein Abundances (in log2) w/ blanks (RRollup 25%|2)									… with imputed values at DS = 2.2, W=3 (highlighted in blue and italicized)									ANOVA
Locus	Desc	PepCount	1004_Bio1	1004_Bio2	1210_Bio1	1210_Bio2	1199_Bio1	1199_Bio2	1149_Bio1	1149_Bio2		1004_Bio1	1004_Bio2	1210_Bio1	1210_Bio2	1199_Bio1	1199_Bio2	1149_Bio1	1149_Bio2		Sig?	p value
Clo1313_0001	chromosomal replication initiator protein DnaA	30	19.2904	20.142	19.1422	19.245	18.5087	19.3799	19.997	19.3487		19.2904	20.142	19.1422	19.245	18.5087	19.3799	19.997	19.3487			0.422596
Clo1313_0002	DNA polymerase III, beta subunit (EC 2.7.7.7)	20	18.7507	19.4984	19.01	16.7669	19.106	17.8554	19.8649	18.7522		18.7507	19.4984	19.01	16.7669	19.106	17.8554	19.8649	18.7522			0.555463
Clo1313_0005	hypothetical protein	8	18.2879	15.7167	15.8907	15.9248	18.6404	16.0384	18.4017	13.0151		18.2879	15.7167	15.8907	15.9248	18.6404	16.0384	18.4017	13.0151			0.862514
Clo1313_0006	DNA gyrase, B subunit	28	18.9645	19.0608	18.9238	16.9499	17.4681	15.3315	18.1407	16.9257		18.9645	19.0608	18.9238	16.9499	17.4681	15.3315	18.1407	16.9257			0.274833
Clo1313_0007	chromosome segregation ATPase	13	19.2584	19.0045	19.9683	18.181	19.9142	19.753	20.3945	19.61		19.2584	19.0045	19.9683	18.181	19.9142	19.753	20.3945	19.61			0.504021
Clo1313_0008	parB-like partition protein	29	16.2251	17.606	15.8636	17.3691	15.1639	17.2687	17.6824	18.1344		16.2251	17.606	15.8636	17.3691	15.1639	17.2687	17.6824	18.1344			0.497612
Clo1313_0009	hypothetical protein	4							14.4037	14.4214		12.4162	10.9419	12.3645	12.8108	11.3184	11.2647	14.4037	14.4214		+	0.0156716
Clo1313_0010	TPR repeat-containing protein	11		13.869	14.3694				15.6579	14.5735		12.3009	13.869	14.3694	12.797	11.2365	10.4844	15.6579	14.5735		+	0.0411266
Clo1313_0011	seryl-tRNA synthetase (EC 6.1.1.11)	31	19.8791	19.9782	19.7205	19.4883	19.6783	19.9935	20.531	20.1492		19.8791	19.9782	19.7205	19.4883	19.6783	19.9935	20.531	20.1492			0.0797217
Clo1313_0013	copper amine oxidase-like domain-containing protein	13	20.1117	20.6421	19.5648		19.3136	18.1717	19.1551			20.1117	20.6421	19.5648	11.6307	19.3136	18.1717	19.1551	12.4033			0.558748
Clo1313_0014	S-layer domain-containing protein	6	16.5626	14.2262	16.9426				16.4455			16.5626	14.2262	16.9426	11.4946	11.4435	12.3181	16.4455	12.5671			0.596762
Clo1313_0016	VanW family protein	26	17.1928	17.8401			15.7035	17.8841	18.5327	18.013		17.1928	17.8401	11.0888	10.7753	15.7035	17.8841	18.5327	18.013		+	0.00288214
Clo1313_0020	pyruvate/ketoisovalerate oxidoreductase, gamma subunit	18	25.2762	25.0576	24.1093	24.6987	24.266	24.485	24.5174	24.9278		25.2762	25.0576	24.1093	24.6987	24.266	24.485	24.5174	24.9278			0.126317
Clo1313_0021	pyruvate ferredoxin/flavodoxin oxidoreductase, delta subunit	11	25.1892	23.6271	24.3703	22.5995	24.9587	23.2977	23.85	21.9592		25.1892	23.6271	24.3703	22.5995	24.9587	23.2977	23.85	21.9592			0.643689
Clo1313_0022	pyruvate flavodoxin/ferredoxin oxidoreductase domain protein	40	23.9797	24.0889	22.6074	22.9693	23.2582	23.7913	24.0338	24.0137		23.9797	24.0889	22.6074	22.9693	23.2582	23.7913	24.0338	24.0137		+	0.015978
Clo1313_0023	thiamine pyrophosphate TPP-binding domain-containing protein	28	25.8042	24.555	23.8811	23.9595	24.4549	23.9387	24.3346	24.7464		25.8042	24.555	23.8811	23.9595	24.4549	23.9387	24.3346	24.7464			0.212963
Clo1313_0030	Formate-tetrahydrofolate ligase (EC 6.3.4.3)	33	19.6597	18.8926	19.3465	16.3075	18.8467	19.1577	20.1288	18.4522		19.6597	18.8926	19.3465	16.3075	18.8467	19.1577	20.1288	18.4522			0.645451
Clo1313_0032	protein of unknown function DUF1021	7	19.5567	16.0572		15.0859	19.2572		16.1155	17.6491		19.5567	16.0572	11.9743	15.0859	19.2572	13.1707	16.1155	17.6491			0.521956
Clo1313_0034	4-diphosphocytidyl-2-C-methyl-D-erythritol kinase (EC 2.7.1.148)	9	12.7337	11.4096	14.1244					10.8743		12.7337	11.4096	14.1244	10.4068	11.7636	12.0936	12.8554	10.8743			0.993546
Clo1313_0035	transcriptional regulator, GntR family	19	19.1421	19.3907	17.5774	16.3873	17.8563	18.9186	18.12	17.3127		19.1421	19.3907	17.5774	16.3873	17.8563	18.9186	18.12	17.3127			0.0859623
Clo1313_0038	AAA ATPase central domain protein	33	16.1444	16.0988	16.3031	14.4857	15.4513	15.968	15.6838	15.5686		16.1444	16.0988	16.3031	14.4857	15.4513	15.968	15.6838	15.5686			0.754747
Clo1313_0039	phage shock protein A (PspA) family protein	20	21.2984	20.527	20.385	19.3058	21.4728	20.5288	20.562	19.464		21.2984	20.527	20.385	19.3058	21.4728	20.5288	20.562	19.464			0.346098
Clo1313_0041	protein of unknown function DUF342	14	14.9491	16.2495	16.098		16.4					14.9491	16.2495	16.098	11.4061	16.4	10.5086	10.4275	12.8786			0.623995
Clo1313_0044	NLP/P60 protein	11	10.1492		15.942		14.1816	18.0242		13.6912		10.1492	11.7582	15.942	10.7583	14.1816	18.0242	12.2111	13.6912			0.332699
Clo1313_0049	AAA ATPase	12	15.0955		16.2539	12.2139			15.35	15.7722		15.0955	12.0174	16.2539	12.2139	10.6147	12.2458	15.35	15.7722			0.310784
Clo1313_0053	hypothetical protein	26	21.1889	20.0372	21.0549	19.7349	20.4175	20.0459	20.7819	21.3132		21.1889	20.0372	21.0549	19.7349	20.4175	20.0459	20.7819	21.3132			0.662266
Clo1313_0054	type 3a cellulose-binding domain protein	46	16.3908	14.4109	15.4505		18.1908	16.3137		14.9999		16.3908	14.4109	15.4505	10.4091	18.1908	16.3137	10.7736	14.9999			0.363122
Clo1313_0056	MotA/TolQ/ExbB proton channel	9	17.0678	16.0759								17.0678	16.0759	11.4648	9.54291	12.164	10.9958	10.918	12.1495		+	0.0111082
Clo1313_0058	protein of unknown function DUF1385	9	15.814						16.7569	13.4896		15.814	10.5427	11.8868	12.4004	10.968	12.6213	16.7569	13.4896			0.529233
Clo1313_0061	electron transport complex, RnfABCDGE type, C subunit	26	20.3956	20.4611	19.8602	20.7467	19.9629	21.2905	21.7413	21.9342		20.3956	20.4611	19.8602	20.7467	19.9629	21.2905	21.7413	21.9342			0.153314
Clo1313_0062	electron transport complex, RnfABCDGE type, D subunit	3		15.3369				20.894	21.4664	21.2774		12.8593	15.3369	11.5209	11.501	12.8684	20.894	21.4664	21.2774			0.105604
Clo1313_0063	electron transport complex, RnfABCDGE type, G subunit	14	19.5408	19.9188	18.3332	19.9262	18.8603	20.4897	20.3128	21.0478		19.5408	19.9188	18.3332	19.9262	18.8603	20.4897	20.3128	21.0478			0.437101
Clo1313_0064	electron transport complex, RnfABCDGE type, E subunit	3	18.6502		18.2515	17.7779	17.1108		18.914	18.9675		18.6502	11.4884	18.2515	17.7779	17.1108	12.0314	18.914	18.9675			0.492641
Clo1313_0066	electron transport complex, RnfABCDGE type, B subunit	16	19.0086	16.4584	20.1991	18.7625	18.8069	18.8827	20.7157	20.2437		19.0086	16.4584	20.1991	18.7625	18.8069	18.8827	20.7157	20.2437			0.20733
Clo1313_0068	shikimate kinase (EC 2.7.1.71)	10	14.6224	14.0875	17.7513	13.9021	18.1653	15.6572	18.0734	16.8467		14.6224	14.0875	17.7513	13.9021	18.1653	15.6572	18.0734	16.8467			0.387286
Clo1313_0072	transcriptional regulator, DeoR family	9	15.3896		14.4981	11.1313						15.3896	13.0209	14.4981	11.1313	12.5495	10.3694	12.523	11.6518			0.481498
Clo1313_0075	transketolase subunit B (EC 2.2.1.1)	5	14.9239	15.3208	13.6184	15.163				18.0777		14.9239	15.3208	13.6184	15.163	11.6169	12.2798	11.6327	18.0777			0.573107
Clo1313_0076	Alcohol dehydrogenase GroES domain protein	16	16.9628	16.9558	16.5938	16.6134			17.2045	17.8687		16.9628	16.9558	16.5938	16.6134	10.7023	12.44	17.2045	17.8687		+	0.00247186
Clo1313_0077	hypothetical protein	20	21.3386	20.9755	21.2515	19.9397	18.4253	16.456	20.6194	20.3783		21.3386	20.9755	21.2515	19.9397	18.4253	16.456	20.6194	20.3783		+	0.0379358
Clo1313_0078	ABC transporter related protein	9	13.6665	15.24						14.7768		13.6665	15.24	11.171	13.6261	12.2346	13.0095	12.5015	14.7768			0.474141
Clo1313_0082	oligopeptidase F. Metallo peptidase. MEROPS family M03B	19	14.502	18.0558	16.2559	16.6321	17.5235	17.181	18.1284	17.7189		14.502	18.0558	16.2559	16.6321	17.5235	17.181	18.1284	17.7189			0.58202
Clo1313_0084	S-layer domain-containing protein	23	17.6283	14.8535	16.3249							17.6283	14.8535	16.3249	12.3385	11.532	12.2075	12.3105	12.4051			0.183909
Clo1313_0089	transcriptional regulator, LacI family	6	15.6233		15.8658	17.8882			17.596	18.6826		15.6233	11.9855	15.8658	17.8882	13.2996	11.9	17.596	18.6826			0.0719322
Clo1313_0094	MscS Mechanosensitive ion channel	12	14.4474		13.4512	13.3876		13.375		16.7167		14.4474	11.2313	13.4512	13.3876	11.1663	13.375	11.8826	16.7167			0.81767
Clo1313_0099	acetolactate synthase, large subunit (EC 2.2.1.6)	29	19.2028	18.782	18.5151	17.3617	18.5649	17.8096	19.4462	16.8832		19.2028	18.782	18.5151	17.3617	18.5649	17.8096	19.4462	16.8832			0.764676
Clo1313_0100	acetolactate synthase, small subunit (EC 2.2.1.6)	14	20.1379	21.2611	19.8266	20.2024	18.5939	20.5198	20.9358	20.4409		20.1379	21.2611	19.8266	20.2024	18.5939	20.5198	20.9358	20.4409			0.505494
Clo1313_0101	ketol-acid reductoisomerase (EC 1.1.1.86)	34	23.8927	23.7844	23.3438	22.4232	22.7204	22.2238	23.6136	22.3305		23.8927	23.7844	23.3438	22.4232	22.7204	22.2238	23.6136	22.3305			0.268328
Clo1313_0102	2-isopropylmalate synthase/homocitrate synthase family protein	38	20.818	20.8786	19.4609	18.7537	19.8287	19.4217	20.3046	19.3762		20.818	20.8786	19.4609	18.7537	19.8287	19.4217	20.3046	19.3762			0.0653113
Clo1313_0105	hypothetical protein	8	18.0919				13.6346	16.3016	16.4669			18.0919	11.0406	11.1633	11.5857	13.6346	16.3016	16.4669	12.5804			0.639524
Clo1313_0114	sulfate ABC transporter, periplasmic sulfate-binding protein	25	16.525	16.1025		15.5825				16.5225		16.525	16.1025	12.9403	15.5825	11.9091	11.4795	11.7712	16.5225			0.269357
Clo1313_0126	Lipoprotein LpqB, GerMN domain	18	16.4497	13.8714	15.8274	14.5928	17.0446	15.518	16.1421	14.5363		16.4497	13.8714	15.8274	14.5928	17.0446	15.518	16.1421	14.5363			0.798521
Clo1313_0133	alpha-L-arabinofuranosidase domain protein	16	14.462	14.3929	15.3962		16.8048	12.8102	16.1526	14.2978		14.462	14.3929	15.3962	12.0425	16.8048	12.8102	16.1526	14.2978			0.882399
Clo1313_0139	Radical SAM domain protein	14	13.5758	11.8723								13.5758	11.8723	12.5702	11.6633	11.7334	10.805	11.5307	10.8747			0.305631
Clo1313_0141	methyltransferase FkbM family	13	15.0832	13.8524	13.126							15.0832	13.8524	13.126	11.3464	10.6301	12.2927	12.5615	11.0828			0.155821
Clo1313_0142	Radical SAM domain protein	13	14.8409	15.9295								14.8409	15.9295	11.2271	10.3793	11.6272	12.917	11.3816	11.8591		+	0.00977631
Clo1313_0145	DegT/DnrJ/EryC1/StrS aminotransferase	14	16.0749		16.6976	11.7795	16.9709		18.1322	12.4253		16.0749	11.3624	16.6976	11.7795	16.9709	11.0627	18.1322	12.4253			0.975854
Clo1313_0148	glucose-1-phosphate cytidylyltransferase	10	16.6827	15.0593								16.6827	15.0593	9.55292	11.6091	12.3039	12.4712	12.2926	11.9804		+	0.0197935
Clo1313_0165	Ppx/GppA phosphatase	25	15.9497	17.6994			18.3134	18.8161	15.8026	16.6848		15.9497	17.6994	12.6855	11.9182	18.3134	18.8161	15.8026	16.6848		+	0.00513478
Clo1313_0166	iron-containing alcohol dehydrogenase	21	16.6637	16.3272	17.5965	17.6899	18.1472	19.5482	18.1762	18.949		16.6637	16.3272	17.5965	17.6899	18.1472	19.5482	18.1762	18.949		+	0.0485581
Clo1313_0168	Dihydropteroate synthase (EC 2.5.1.15)	28	18.3599	15.4962	17.6396	13.9009	18.1357	16.8629	16.6739	14.8324		18.3599	15.4962	17.6396	13.9009	18.1357	16.8629	16.6739	14.8324			0.733694
Clo1313_0169	dihydroneopterin aldolase	8	17.1347	13.4945	15.0732		18.0409	18.2245	17.7688			17.1347	13.4945	15.0732	12.8395	18.0409	18.2245	17.7688	13.3442			0.393521
Clo1313_0171	hypothetical protein	4	17.3477				16.3809	18.0021	17.8094	16.7223		17.3477	10.7203	13.1675	12.508	16.3809	18.0021	17.8094	16.7223			0.308814
Clo1313_0172	biotin/acetyl-CoA-carboxylase ligase	12	15.7271	10.3273	14.716		15.9686	15.7274	13.8442	15.247		15.7271	10.3273	14.716	11.9659	15.9686	15.7274	13.8442	15.247			0.608191
Clo1313_0175	pantothenate kinase (EC 2.7.1.33)	9	16.4343	19.7281	18.9843	18.9535	19.4989	19.8818	20.0308	19.6981		16.4343	19.7281	18.9843	18.9535	19.4989	19.8818	20.0308	19.6981			0.496747
Clo1313_0177	glycoside hydrolase family 10	8					15.6026	12.3905				11.0255	12.2773	11.5786	12.6881	15.6026	12.3905	11.0197	10.9147			0.249213
Clo1313_0180	bacterial peptide chain release factor 1 (bRF-1)	18	19.1232	19.1066	17.5237	17.4504	18.4167	18.7093	18.1379	18.4342		19.1232	19.1066	17.5237	17.4504	18.4167	18.7093	18.1379	18.4342		+	0.00183608
Clo1313_0182	translation factor SUA5	13	14.9521	15.0892	13.8834		17.2971	15.0431	14.1873	14.1795		14.9521	15.0892	13.8834	11.3657	17.2971	15.0431	14.1873	14.1795			0.15062
Clo1313_0183	protein tyrosine phosphatase	5	17.0297				18.0217	17.9549				17.0297	11.3831	12.0203	13.6451	18.0217	17.9549	11.5139	13.2545			0.17595
Clo1313_0184	ribose-5-phosphate isomerase (EC 5.3.1.6)	9	14.4891	19.2071	10.938		15.3355	18.289				14.4891	19.2071	10.938	12.2241	15.3355	18.289	9.74025	11.8233			0.0859138
Clo1313_0185	uracil phosphoribosyltransferase (EC 2.4.2.9)	19	21.2248	17.6974	21.1448	17.7783	18.8053	18.9501	21.6418	17.2805		21.2248	17.6974	21.1448	17.7783	18.8053	18.9501	21.6418	17.2805			0.991229
Clo1313_0186	CMP/dCMP deaminase zinc-binding protein	12	17.7774	17.1254	17.9629	16.9071	18.4291	19.1813	18.4639	16.9964		17.7774	17.1254	17.9629	16.9071	18.4291	19.1813	18.4639	16.9964			0.327427
Clo1313_0188	UDP-N-acetylglucosamine 2-epimerase	17	16.5874		16.6243	18.1362	16.8768	16.7742	16.3436	16.5187		16.5874	10.7794	16.6243	18.1362	16.8768	16.7742	16.3436	16.5187			0.416623
Clo1313_0191	ATP synthase F0 subcomplex B subunit	6	14.2959	13.9872	16.9253	13.8795						14.2959	13.9872	16.9253	13.8795	10.282	10.4886	11.9093	12.0485		+	0.0331839
Clo1313_0193	ATP synthase F1 subcomplex alpha subunit	23	17.6106	17.298	18.4056	17.729	18.2689	18.422	18.1165	17.6958		17.6106	17.298	18.4056	17.729	18.2689	18.422	18.1165	17.6958			0.161866
Clo1313_0194	ATP synthase F1, gamma subunit	8	14.8643	15.901	14.3968	15.3424			15.959			14.8643	15.901	14.3968	15.3424	12.3504	12.2394	15.959	12.108			0.296367
Clo1313_0195	ATP synthase F1 subcomplex beta subunit	24	19.527	19.6041	20.4274	19.5087	18.569	19.5209	20.2085	20.5703		19.527	19.6041	20.4274	19.5087	18.569	19.5209	20.2085	20.5703			0.173439
Clo1313_0198	S-layer domain-containing protein	20	15.5953	13.1786								15.5953	13.1786	12.4402	13.6057	12.1955	12.2617	11.208	10.36			0.0877425
Clo1313_0199	fibronectin type III domain protein	19	14.7468	15.6046								14.7468	15.6046	12.1345	11.7341	13.32	11.37	12.3051	12.6674		+	0.0428762
Clo1313_0202	UDP-N-acetylglucosamine 1-carboxyvinyltransferase (EC 2.5.1.7)	20	16.5448	14.2516	17.6023	13.9583	15.6438	14.4163	16.7002	14.8924		16.5448	14.2516	17.6023	13.9583	15.6438	14.4163	16.7002	14.8924			0.961203
Clo1313_0206	rod shape-determining protein MreB	25	20.6436	19.9972	19.8334	18.4397	20.9229	20.755	20.5275	19.5219		20.6436	19.9972	19.8334	18.4397	20.9229	20.755	20.5275	19.5219			0.2089
Clo1313_0213	3-hydroxyacyl-[acyl-carrier-protein] dehydratase (EC 4.2.1.-)	8	17.7731		18.2679	17.0828	18.7248	19.3306	17.8111	17.9026		17.7731	13.81	18.2679	17.0828	18.7248	19.3306	17.8111	17.9026			0.314642
Clo1313_0214	UDP-N-acetylmuramate--L-alanine ligase (EC 6.3.2.8)	13	13.2753	11.8924								13.2753	11.8924	12.0304	11.5124	10.9084	12.0677	11.0427	11.0801			0.27553
Clo1313_0215	purine operon repressor, PurR	12	17.7296	15.5299	16.2894	13.1832	16.3826	18.2888	17.6136	15.3999		17.7296	15.5299	16.2894	13.1832	16.3826	18.2888	17.6136	15.3999			0.53454
Clo1313_0216	SpoVG family protein	13	24.641	23.9342	23.1873	22.5401	23.8506	21.2996	24.0385	22.3588		24.641	23.9342	23.1873	22.5401	23.8506	21.2996	24.0385	22.3588			0.524434
Clo1313_0217	UDP-N-acetylglucosamine pyrophosphorylase (EC 2.7.7.23)/glucosamine-1-phosphate N-acetyltransferase (EC 2.3.1.157)	25	19.0072	18.1205	17.611	17.5478	17.1802	18.8852	17.8715	18.7108		19.0072	18.1205	17.611	17.5478	17.1802	18.8852	17.8715	18.7108			0.629357
Clo1313_0218	ribose-phosphate pyrophosphokinase	21	20.5211	20.7137	20.2151	20.1995	19.6636	20.996	20.6403	20.4582		20.5211	20.7137	20.2151	20.1995	19.6636	20.996	20.6403	20.4582			0.815324
Clo1313_0221	PpiC-type peptidyl-prolyl cis-trans isomerase	27	15.4364	15.1932	15.9747	17.2327	14.6359	17.1073	17.6728	18.3927		15.4364	15.1932	15.9747	17.2327	14.6359	17.1073	17.6728	18.3927			0.182532
Clo1313_0245	MazG family protein	14	17.8419	16.0468	17.2797	15.7787	15.8588	15.9528	15.704	16.1732		17.8419	16.0468	17.2797	15.7787	15.8588	15.9528	15.704	16.1732			0.598667
Clo1313_0246	histone family protein DNA-binding protein	11	21.4877	20.0739	19.8909	19.2433	19.1084	19.6357	20.5898	19.7274		21.4877	20.0739	19.8909	19.2433	19.1084	19.6357	20.5898	19.7274			0.273912
Clo1313_0252	methyl-accepting chemotaxis sensory transducer	7	14.9997	11.4954			15.5514	10.8073				14.9997	11.4954	11.6539	12.0404	15.5514	10.8073	11.0921	11.601			0.751826
Clo1313_0253	2-octaprenylphenol hydroxylase (EC 1.14.13.-)	10	12.8788				16.2959	11.7943		13.5276		12.8788	10.5909	11.9751	11.406	16.2959	11.7943	11.0396	13.5276			0.643308
Clo1313_0255	ATPase, P-type (transporting), HAD superfamily, subfamily IC	19	17.3225		16.9557	13.3069	15.2196	14.183	14.6863	12.9385		17.3225	11.783	16.9557	13.3069	15.2196	14.183	14.6863	12.9385			0.955698
Clo1313_0266	GumN family protein	27	19.9204	20.5791	19.9431		20.6416	18.3291	21.0338	18.0689		19.9204	20.5791	19.9431	13.5289	20.6416	18.3291	21.0338	18.0689			0.603155
Clo1313_0276	type IV pilus assembly protein PilM	35	18.9415	18.739	18.88	17.6155	19.3403	18.3271	19.2509	17.7677		18.9415	18.739	18.88	17.6155	19.3403	18.3271	19.2509	17.7677			0.846092
Clo1313_0277	thioesterase superfamily protein	8	17.6799		15.871		15.6837	16.7945	17.2428	17.294		17.6799	10.9021	15.871	12.0695	15.6837	16.7945	17.2428	17.294			0.625253
Clo1313_0282	galactoside O-acetyltransferase	7	15.9616		14.9888	13.4565	16.7183	16.6664	14.9588	15.3269		15.9616	13.4598	14.9888	13.4565	16.7183	16.6664	14.9588	15.3269			0.244472
Clo1313_0283	glycosyl transferase group 1	18	15.8418	17.1877		15.5086		17.8834	16.2093	16.5136		15.8418	17.1877	11.3842	15.5086	12.612	17.8834	16.2093	16.5136			0.605926
Clo1313_0284	hypothetical protein	6			13.9971		19.1986	16.9145	18.8455	14.3019		10.5543	11.3987	13.9971	11.4524	19.1986	16.9145	18.8455	14.3019			0.0716577
Clo1313_0287	carbohydrate kinase, YjeF related protein	16	12.885	13.8716	14.099	12.5883		14.2807	14.5529	14.9166		12.885	13.8716	14.099	12.5883	11.478	14.2807	14.5529	14.9166			0.510868
Clo1313_0288	alanine racemase (EC 5.1.1.1)	10	18.1169	16.1638	16.4183			17.1578	16.9866			18.1169	16.1638	16.4183	12.6198	12.7812	17.1578	16.9866	10.0393			0.738788
Clo1313_0290	transcriptional modulator of MazE/toxin, MazF	6		17.2287			17.2937	18.2802	15.7239	15.262		10.3435	17.2287	11.303	11.8616	17.2937	18.2802	15.7239	15.262			0.223782
Clo1313_0291	hypothetical protein	7	17.2447	17.3143	17.4542	15.5655	17.8911	16.0595	17.831	15.3279		17.2447	17.3143	17.4542	15.5655	17.8911	16.0595	17.831	15.3279			0.919932
Clo1313_0293	polysaccharide pyruvyl transferase CsaB	17	15.3665		16.4129			17.6134	16.0148	14.6554		15.3665	10.5656	16.4129	11.0563	11.2631	17.6134	16.0148	14.6554			0.908971
Clo1313_0295	transketolase subunit A (EC 2.2.1.1)	19	20.9458	20.0467	20.9697	19.4917	21.0543	21.0288	20.8754	19.9177		20.9458	20.0467	20.9697	19.4917	21.0543	21.0288	20.8754	19.9177			0.699845
Clo1313_0296	transketolase subunit B (EC 2.2.1.1)	16	20.3937	20.3459	19.5202	19.4444	20.2137	20.861	20.7906	20.2358		20.3937	20.3459	19.5202	19.4444	20.2137	20.861	20.7906	20.2358			0.0671799
Clo1313_0297	ABC transporter related protein	21	19.8898	16.1879	19.2468	16.2437	18.8467	18.3564	19.2968	16.6038		19.8898	16.1879	19.2468	16.2437	18.8467	18.3564	19.2968	16.6038			0.972418
Clo1313_0299	ABC-type uncharacterized transport system	27	19.8181	19.3466	19.9837	19.2429	19.3072	22.0529	20.5218	20.5162		19.8181	19.3466	19.9837	19.2429	19.3072	22.0529	20.5218	20.5162			0.621913
Clo1313_0300	hypothetical protein	25	18.9191	18.5197	17.9908	16.7594	16.0479	19.9713	17.0932	19.62		18.9191	18.5197	17.9908	16.7594	16.0479	19.9713	17.0932	19.62			0.875821
Clo1313_0304	dihydroxy-acid dehydratase	41	23.2243	22.6555	22.3767	21.2577	21.9603	21.0726	22.3609	20.9268		23.2243	22.6555	22.3767	21.2577	21.9603	21.0726	22.3609	20.9268			0.33465
Clo1313_0305	acetolactate synthase, large subunit (EC 2.2.1.6)	43	20.7642	20.8002	20.3752	18.9665	20.214	20.5797	20.8036	18.9461		20.7642	20.8002	20.3752	18.9665	20.214	20.5797	20.8036	18.9461			0.585738
Clo1313_0306	LSU ribosomal protein L33P	6	22.6332	20.4296	16.8295		18.4782		20.4059			22.6332	20.4296	16.8295	12.6182	18.4782	12.1116	20.4059	12.5619			0.406621
Clo1313_0308	transcription antitermination protein nusG	12	19.7042	18.675	17.7721	17.7523	18.1295	19.197	17.9561	15.7111		19.7042	18.675	17.7721	17.7523	18.1295	19.197	17.9561	15.7111			0.211196
Clo1313_0309	LSU ribosomal protein L11P	12	23.0017	22.1611	20.8371	19.9962	20.7961	19.9336	22.1261	20.8771		23.0017	22.1611	20.8371	19.9962	20.7961	19.9336	22.1261	20.8771			0.0832625
Clo1313_0310	LSU ribosomal protein L1P	24	21.6303	21.8837	19.9206	20.9189	20.4282	19.7799	21.2776	19.5569		21.6303	21.8837	19.9206	20.9189	20.4282	19.7799	21.2776	19.5569			0.262777
Clo1313_0311	LSU ribosomal protein L10P	19	24.2118	23.9565	22.786	22.116	22.7362	21.4407	23.2392	21.5324		24.2118	23.9565	22.786	22.116	22.7362	21.4407	23.2392	21.5324			0.193998
Clo1313_0312	LSU ribosomal protein L12P	20	24.4578	24.6139	22.1015	23.0025	20.8565	22.7895	22.7931	22.9013		24.4578	24.6139	22.1015	23.0025	20.8565	22.7895	22.7931	22.9013			0.087279
Clo1313_0313	DNA-directed RNA polymerase subunit beta (EC 2.7.7.6)	91	21.4743	20.6471	20.226	19.3183	19.8166	19.8162	19.9314	18.8618		21.4743	20.6471	20.226	19.3183	19.8166	19.8162	19.9314	18.8618			0.147352
Clo1313_0314	DNA-directed RNA polymerase subunit beta' (EC 2.7.7.6)	98	22.2014	21.8845	20.7227	20.1694	20.7083	20.8761	21.3388	20.3183		22.2014	21.8845	20.7227	20.1694	20.7083	20.8761	21.3388	20.3183			0.0706672
Clo1313_0315	LSU ribosomal protein L7AE	8	19.6881	16.939	18.3662	17.3957	17.9035		18.4103			19.6881	16.939	18.3662	17.3957	17.9035	12.913	18.4103	11.1492			0.660456
Clo1313_0316	SSU ribosomal protein S12P	16	21.0997	20.6304	20.3697	20.1779	20.5832	18.6426	20.9959	20.352		21.0997	20.6304	20.3697	20.1779	20.5832	18.6426	20.9959	20.352			0.444797
Clo1313_0317	SSU ribosomal protein S7P	18	22.7396	22.5852	21.9955	21.8525	21.7916	19.8298	21.8523	21.3759		22.7396	22.5852	21.9955	21.8525	21.7916	19.8298	21.8523	21.3759			0.221001
Clo1313_0318	translation elongation factor G	58	23.0463	21.9195	21.5042	21.1089	21.4809	22.163	22.1434	21.3334		23.0463	21.9195	21.5042	21.1089	21.4809	22.163	22.1434	21.3334			0.346462
Clo1313_0319	translation elongation factor Tu	42	27.3615	25.9483	26.8887	25.2504	26.453	25.4404	26.3091	25.3378		27.3615	25.9483	26.8887	25.2504	26.453	25.4404	26.3091	25.3378			0.807899
Clo1313_0324	Phosphotransferase system, phosphocarrier protein HPr	6	21.4679	18.1082	18.1963	18.7054		18.5655	19.147	18.6795		21.4679	18.1082	18.1963	18.7054	11.8199	18.5655	19.147	18.6795			0.438414
Clo1313_0325	phosphoenolpyruvate--protein phosphotransferase (EC 2.7.3.9)	7			13.7636	11.7455				14.2722		10.1851	9.19018	13.7636	11.7455	13.8381	12.306	13.0883	14.2722			0.0617823
Clo1313_0326	Excinuclease ABC subunit C	14	14.2422	15.0335	14.1626		14.6485					14.2422	15.0335	14.1626	11.2928	14.6485	12.4865	11.8704	11.1556			0.257837
Clo1313_0328	trigger factor	44	20.8386	20.3367	19.5941	19.3259	19.1701	19.2644	19.6069	19.0747		20.8386	20.3367	19.5941	19.3259	19.1701	19.2644	19.6069	19.0747		+	0.0233677
Clo1313_0329	ATP-dependent Clp protease, proteolytic subunit ClpP	14	21.5765	21.0916	20.0256	19.9503	20.0786	19.9859	19.0764	19.7974		21.5765	21.0916	20.0256	19.9503	20.0786	19.9859	19.0764	19.7974		+	0.0147587
Clo1313_0330	ATP-dependent Clp protease, ATP-binding subunit ClpX	19	14.1916	14.8576	13.8908	16.7683	11.3206		11.1768			14.1916	14.8576	13.8908	16.7683	11.3206	12.2878	11.1768	11.9231			0.0629592
Clo1313_0332	O-sialoglycoprotein endopeptidase (EC 3.4.24.57)	6	18.2774	15.8286	17.8968	16.8475	17.2647	17.6907	18.6867	18.1085		18.2774	15.8286	17.8968	16.8475	17.2647	17.6907	18.6867	18.1085			0.599177
Clo1313_0336	PHP domain protein	5	11.5417	12.8254	11.5484							11.5417	12.8254	11.5484	11.2964	11.734	11.4949	13.1014	12.3577			0.207765
Clo1313_0349	endoglucanase Cel9V	21					16.1949	14.5472				11.5112	10.3715	10.6484	10.5382	16.1949	14.5472	12.4897	11.4188		+	0.0125646
Clo1313_0350	glycoside hydrolase family 9	10					15.3784	15.5983				11.1259	11.2307	12.6679	12.4346	15.3784	15.5983	12.2864	10.143		+	0.013908
Clo1313_0356	Methyltransferase type 12	6					14.9226	15.4032				11.8987	13.5181	11.3196	11.8976	14.9226	15.4032	12.1835	11.8819		+	0.0172801
Clo1313_0357	polynucleotide 3'-phosphatase/polynucleotide 5'-hydroxyl-kinase/polynucleotide 2',3'-cyclic phosphate phosphodiesterase	24		12.6152	15.803		15.3649	16.1469	14.2014			11.1911	12.6152	15.803	11.4691	15.3649	16.1469	14.2014	11.8315			0.332102
Clo1313_0360	transcriptional regulator, Crp/Fnr family	9						14.9356	15.9982	13.0007		11.2474	10.7737	12.5459	11.7016	12.1892	14.9356	15.9982	13.0007			0.233345
Clo1313_0387	endoribonuclease L-PSP	11	17.7024	19.0436		17.2248	16.0987		17.5278	18.2152		17.7024	19.0436	12.283	17.2248	16.0987	11.0178	17.5278	18.2152			0.306839
Clo1313_0388	Cys/Met metabolism pyridoxal-phosphate-dependent protein	13	18.759	19.2661	17.0534	16.5417	18.56	15.2879	17.0278	14.8653		18.759	19.2661	17.0534	16.5417	18.56	15.2879	17.0278	14.8653			0.302465
Clo1313_0389	aminotransferase class I and II	12	15.1235	13.8327	13.2782		13.1338	13.6033	14.2033	15.6191		15.1235	13.8327	13.2782	10.4023	13.1338	13.6033	14.2033	15.6191			0.201503
Clo1313_0394	hypothetical protein	20					15.5482	15.4032				11.4608	10.098	12.3393	11.5353	15.5482	15.4032	11.9613	12.0212		+	0.00435117
Clo1313_0395	glycoside hydrolase family 5	11	16.5061	14.9809	15.2855				15.9021	11.8018		16.5061	14.9809	15.2855	10.8596	13.0751	12.2976	15.9021	11.8018			0.5759
Clo1313_0397	Glucan endo-1,3-beta-D-glucosidase	43	18.2905	18.8245	19.5047	18.1666	17.9453	18.2714	20.0443	18.7476		18.2905	18.8245	19.5047	18.1666	17.9453	18.2714	20.0443	18.7476			0.416076
Clo1313_0400	glycoside hydrolase family 9	21	16.2976	16.8768	12.9912	13.7139	20.1011	18.2769		12.9096		16.2976	16.8768	12.9912	13.7139	20.1011	18.2769	12.2956	12.9096		+	0.00287794
Clo1313_0403	lysyl-tRNA synthetase, class I (EC 6.1.1.6)	39	20.4962	19.8195	19.8883	19.2058	19.9	19.4042	20.1919	17.8685		20.4962	19.8195	19.8883	19.2058	19.9	19.4042	20.1919	17.8685			0.690537
Clo1313_0405	CheW protein	5	17.0555	15.3598	13.4614				15.607			17.0555	15.3598	13.4614	11.1536	10.2458	11.1403	15.607	10.7541			0.186191
Clo1313_0406	CheA signal transduction histidine kinase	7	11.6006	16.1285					14.6693			11.6006	16.1285	11.9508	10.8104	11.8556	11.5204	14.6693	12.1688			0.527169
Clo1313_0407	methyl-accepting chemotaxis sensory transducer	59	20.1442	20.2973	16.4393	13.2535		11.681	17.8832			20.1442	20.2973	16.4393	13.2535	11.7391	11.681	17.8832	10.7279			0.137917
Clo1313_0409	response regulator receiver modulated CheB methylesterase	3	14.3981	14.9657								14.3981	14.9657	11.7567	11.1307	12.4697	11.9661	11.8135	10.9563		+	0.00575898
Clo1313_0410	oxidoreductase domain protein	15	16.4549	16.4851	16.7265	15.1078	16.9658	18.2224	16.0265	17.8067		16.4549	16.4851	16.7265	15.1078	16.9658	18.2224	16.0265	17.8067			0.448539
Clo1313_0413	glycoside hydrolase family 5	21	15.9337	13.7383	13.4224	16.7355	19.4555	18.0799	14.6979	16.5747		15.9337	13.7383	13.4224	16.7355	19.4555	18.0799	14.6979	16.5747			0.197872
Clo1313_0415	Phosphoenolpyruvate carboxykinase (GTP)	65	25.022	24.294	25.8594	24.8926	26.325	24.6875	26.4495	25.3239		25.022	24.294	25.8594	24.8926	26.325	24.6875	26.4495	25.3239			0.563508
Clo1313_0416	SSU ribosomal protein S30P/sigma 54 modulation protein	18	23.1784	23.5436	21.9256	22.4461	22.9211	23.079	23.776	23.4282		23.1784	23.5436	21.9256	22.4461	22.9211	23.079	23.776	23.4282		+	0.0206253
Clo1313_0417	ATP-dependent DNA helicase PcrA	12	16.3469	16.7302			14.3938		15.6884			16.3469	16.7302	10.7619	11.293	14.3938	11.3168	15.6884	11.1733			0.174561
Clo1313_0418	S-layer domain-containing protein	8	15.3855	15.1435		17.5455			13.7607			15.3855	15.1435	10.3816	17.5455	11.7352	10.4879	13.7607	11.3499			0.52534
Clo1313_0421	ATP phosphoribosyltransferase regulatory subunit (EC 2.4.2.17)	30	13.5932	12.2675	16.4271	13.0034	14.9882	12.9532	15.3086	15.0679		13.5932	12.2675	16.4271	13.0034	14.9882	12.9532	15.3086	15.0679			0.523958
Clo1313_0422	ATP phosphoribosyltransferase catalytic subunit (EC 2.4.2.17)	13	17.2499	16.7406	17.414	17.6035	16.7283	14.3022	18.5982	18.0125		17.2499	16.7406	17.414	17.6035	16.7283	14.3022	18.5982	18.0125			0.134781
Clo1313_0423	histidinol dehydrogenase	27	15.9524	13.2424	18.0212	15.6702	16.7198	16.1682	17.9439	19.3174		15.9524	13.2424	18.0212	15.6702	16.7198	16.1682	17.9439	19.3174			0.164493
Clo1313_0424	histidinol phosphate aminotransferase apoenzyme (EC 2.6.1.9)	15			14.3993	10.9782	15.2733		15.8009	14.2159		12.0548	11.0976	14.3993	10.9782	15.2733	12.5273	15.8009	14.2159			0.33081
Clo1313_0425	imidazoleglycerol-phosphate dehydratase (EC 4.2.1.19)	5	15.7486	18.4264	15.1186	15.1202	12.8857	18.8686	16.4698	18.66		15.7486	18.4264	15.1186	15.1202	12.8857	18.8686	16.4698	18.66			0.750299
Clo1313_0426	phosphoribosylaminoimidazole-succinocarboxamide synthase (EC 6.3.2.6)	32	20.5167	19.3871	20.8067	20.035	20.8039	20.9358	21.397	21.058		20.5167	19.3871	20.8067	20.035	20.8039	20.9358	21.397	21.058			0.204227
Clo1313_0427	imidazole glycerol phosphate synthase subunit hisH (EC 2.4.2.-)	8	16.2825	18.7476	13.8883	16.4916	15.8974	17.0094	17.4007	16.4028		16.2825	18.7476	13.8883	16.4916	15.8974	17.0094	17.4007	16.4028			0.469298
Clo1313_0428	1-(5-phosphoribosyl)-5-[(5-phosphoribosylamino)methylideneamino] imidazole-4-carboxamide isomerase (EC 5.3.1.16)	24	18.2317	18.3599	19.2604	18.1356	18.8254	17.6128	18.6045	18.1544		18.2317	18.3599	19.2604	18.1356	18.8254	17.6128	18.6045	18.1544			0.86493
Clo1313_0429	imidazoleglycerol phosphate synthase, cyclase subunit	30	20.0495	19.6794	20.1255	19.805	20.3903	20.1385	20.8015	20.8771		20.0495	19.6794	20.1255	19.805	20.3903	20.1385	20.8015	20.8771		+	0.0251384
Clo1313_0430	phosphoribosyl-AMP cyclohydrolase (EC 3.5.4.19)/phosphoribosyl-ATP pyrophosphatase (EC 3.6.1.31)	20	17.6736	17.3581	17.8921	15.2404	17.5417	16.3939	18.6145	17.4251		17.6736	17.3581	17.8921	15.2404	17.5417	16.3939	18.6145	17.4251			0.621276
Clo1313_0432	Chaperonin Cpn10	11	22.5093	22.6841	23.0832	23.4017	21.4971	22.7439	23.3532	23.2917		22.5093	22.6841	23.0832	23.4017	21.4971	22.7439	23.3532	23.2917			0.154045
Clo1313_0433	chaperonin GroEL	66	22.7599	22.5583	23.3872	23.0276	21.4024	22.2109	23.3069	22.6369		22.7599	22.5583	23.3872	23.0276	21.4024	22.2109	23.3069	22.6369			0.0841002
Clo1313_0434	type IV pilus assembly PilZ	7	13.6284		13.958	14.3772	12.2408		14.8964			13.6284	10.9358	13.958	14.3772	12.2408	12.2462	14.8964	12.8985			0.347106
Clo1313_0435	hypothetical protein	5			15.1394			18.4931	17.9667	16.49		11.2597	13.6169	15.1394	12.0743	11.3329	18.4931	17.9667	16.49			0.483559
Clo1313_0436	glycoside hydrolase family 18	21	17.3076	15.3611	17.1978	15.9499	15.5649	16.8967	17.7874	16.5442		17.3076	15.3611	17.1978	15.9499	15.5649	16.8967	17.7874	16.5442			0.809641
Clo1313_0438	transcription elongation factor GreA	14	21.4737	20.3551	19.7304	18.872	19.1858	16.8786	20.1307	16.295		21.4737	20.3551	19.7304	18.872	19.1858	16.8786	20.1307	16.295			0.396588
Clo1313_0439	anti-sigma-factor antagonist	8	16.9836	17.2007	17.6539			18.3796	17.9414	17.3509		16.9836	17.2007	17.6539	12.0585	11.8522	18.3796	17.9414	17.3509			0.748402
Clo1313_0440	putative anti-sigma regulatory factor, serine/threonine protein kinase	8	17.95	20.1277	15.8287	18.7249		20.3009	16.9451	18.6148		17.95	20.1277	15.8287	18.7249	11.4246	20.3009	16.9451	18.6148			0.830483
Clo1313_0444	SSU ribosomal protein S10P	13	24.3571	23.7778	22.4041	22.8571	22.1625	21.2367	23.6232	22.5619		24.3571	23.7778	22.4041	22.8571	22.1625	21.2367	23.6232	22.5619			0.055859
Clo1313_0445	LSU ribosomal protein L3P	29	21.8674	21.1626	19.7673	19.8299	20.4128	18.9078	20.9054	18.9785		21.8674	21.1626	19.7673	19.8299	20.4128	18.9078	20.9054	18.9785			0.278939
Clo1313_0446	LSU ribosomal protein L4P	20	22.3659	22.3492	20.6675	20.6583	20.8534	19.6204	21.7669	21.086		22.3659	22.3492	20.6675	20.6583	20.8534	19.6204	21.7669	21.086		+	0.0453736
Clo1313_0447	LSU ribosomal protein L23P	12	23.0261	21.8177	21.0102	21.2019	19.8391	19.8189	21.68	20.6217		23.0261	21.8177	21.0102	21.2019	19.8391	19.8189	21.68	20.6217		+	0.0469649
Clo1313_0448	LSU ribosomal protein L2P	26	22.119	20.9777	19.8584	20.265	20.2009	18.2754	20.794	18.9925		22.119	20.9777	19.8584	20.265	20.2009	18.2754	20.794	18.9925			0.28528
Clo1313_0449	ribosomal protein S19	9	19.9841	20.008	18.6977	20.8935	19.862		17.6709	18.0001		19.9841	20.008	18.6977	20.8935	19.862	9.9509	17.6709	18.0001			0.528566
Clo1313_0450	LSU ribosomal protein L22P	20	22.9296	22.8167	20.0889	21.6785	20.0829	20.2839	22.0813	20.5814		22.9296	22.8167	20.0889	21.6785	20.0829	20.2839	22.0813	20.5814			0.0963125
Clo1313_0451	ribosomal protein S3	26	24.0506	23.4172	22.3892	22.8165	21.5388	21.78	23.2801	22.142		24.0506	23.4172	22.3892	22.8165	21.5388	21.78	23.2801	22.142			0.0589554
Clo1313_0452	ribosomal protein L16	8	23.6998	18.9453	20.9471	17.6164	20.5819	17.7369	21.5958	17.4031		23.6998	18.9453	20.9471	17.6164	20.5819	17.7369	21.5958	17.4031			0.839889
Clo1313_0453	LSU ribosomal protein L29P	5	21.8238	17.0444	17.769	13.6396			19.4784			21.8238	17.0444	17.769	13.6396	11.2916	12.7677	19.4784	10.7383			0.403657
Clo1313_0454	SSU ribosomal protein S17P	10	21.165	18.4729	19.3207	19.2022	20.4244	19.2301	21.4295	17.8205		21.165	18.4729	19.3207	19.2022	20.4244	19.2301	21.4295	17.8205			0.98238
Clo1313_0455	LSU ribosomal protein L14P	15	22.2952	22.9176	20.2088	21.7407	20.225	20.4262	20.6138	21.0404		22.2952	22.9176	20.2088	21.7407	20.225	20.4262	20.6138	21.0404			0.0707275
Clo1313_0456	ribosomal protein L24	13	22.4784	21.1194	20.8325	19.7777	20.0132	16.5064	21.1754	20.9121		22.4784	21.1194	20.8325	19.7777	20.0132	16.5064	21.1754	20.9121			0.206493
Clo1313_0457	LSU ribosomal protein L5P	26	22.9496	22.3636	21.8512	21.881	21.6515	20.3237	22.4584	21.8018		22.9496	22.3636	21.8512	21.881	21.6515	20.3237	22.4584	21.8018			0.153792
Clo1313_0459	ribosomal protein S8	23	23.1012	22.8057	22.0069	22.2697	22.0882	21.3622	22.5629	22.0806		23.1012	22.8057	22.0069	22.2697	22.0882	21.3622	22.5629	22.0806			0.0884324
Clo1313_0460	LSU ribosomal protein L6P	21	21.7207	21.5308	20.4081	20.247	20.0908	17.8837	21.0553	19.4641		21.7207	21.5308	20.4081	20.247	20.0908	17.8837	21.0553	19.4641			0.199641
Clo1313_0461	LSU ribosomal protein L18P	12	21.7994	22.7154	20.793	21.5992	21.4807	20.3875	21.8066	21.7018		21.7994	22.7154	20.793	21.5992	21.4807	20.3875	21.8066	21.7018			0.246923
Clo1313_0462	SSU ribosomal protein S5P	17	23.2544	23.7367	21.5555	22.8968	21.3121	21.3453	22.9658	22.5178		23.2544	23.7367	21.5555	22.8968	21.3121	21.3453	22.9658	22.5178			0.0590805
Clo1313_0463	LSU ribosomal protein L30P	5	20.0779	19.4841	17.4867	18.7897	15.809		18.769			20.0779	19.4841	17.4867	18.7897	15.809	10.1748	18.769	12.3323			0.273024
Clo1313_0464	LSU ribosomal protein L15P	16	23.548	21.9274	21.645	20.6771	21.452	18.5527	21.9363	20.0716		23.548	21.9274	21.645	20.6771	21.452	18.5527	21.9363	20.0716			0.383479
Clo1313_0465	protein translocase subunit secY/sec61 alpha	5	20.582	21.6635	19.974	20.8495	20.2206	20.3072	20.8586			20.582	21.6635	19.974	20.8495	20.2206	20.3072	20.8586	11.7391			0.516727
Clo1313_0466	Adenylate kinase (EC 2.7.4.3)	29	22.5641	22.4553	20.9042	21.4819	20.9706	20.7632	22.1257	20.6831		22.5641	22.4553	20.9042	21.4819	20.9706	20.7632	22.1257	20.6831			0.140022
Clo1313_0467	methionine aminopeptidase, type I (EC 3.4.11.18)	12	16.7379	16.6731	15.4026	14.2909	15.5687		14.8569	14.708		16.7379	16.6731	15.4026	14.2909	15.5687	11.9125	14.8569	14.708			0.310373
Clo1313_0469	translation initiation factor IF-1	5	20.0658	18.6178	18.6434	18.3368	18.3201	17.6742	19.663	14.7865		20.0658	18.6178	18.6434	18.3368	18.3201	17.6742	19.663	14.7865			0.714864
Clo1313_0471	SSU ribosomal protein S13P	23	22.6767	22.3334	19.578	21.2288	20.1957	19.3593	21.093	20.3931		22.6767	22.3334	19.578	21.2288	20.1957	19.3593	21.093	20.3931			0.0680235
Clo1313_0472	SSU ribosomal protein S11P	8	19.7095	17.4686	17.2107	16.2162	18.4336	17.6615	19.1604	19.9522		19.7095	17.4686	17.2107	16.2162	18.4336	17.6615	19.1604	19.9522			0.150714
Clo1313_0473	SSU ribosomal protein S4P	30	23.8161	23.2132	22.5393	22.261	22.3523	20.9316	22.6993	22.3485		23.8161	23.2132	22.5393	22.261	22.3523	20.9316	22.6993	22.3485			0.120884
Clo1313_0474	DNA-directed RNA polymerase subunit alpha (EC 2.7.7.6)	36	22.7742	22.7372	22.1435	22.1834	21.8946	22.9334	22.5677	22.1522		22.7742	22.7372	22.1435	22.1834	21.8946	22.9334	22.5677	22.1522			0.566118
Clo1313_0475	LSU ribosomal protein L17P	18	22.242	21.4736	20.2607	20.204	20.5583	19.3371	21.0791	20.0689		22.242	21.4736	20.2607	20.204	20.5583	19.3371	21.0791	20.0689			0.121049
Clo1313_0478	type III restriction protein res subunit	15	11.9836	13.3546	13.8526		13.6581					11.9836	13.3546	13.8526	11.3436	13.6581	10.8284	10.9841	12.4382			0.912976
Clo1313_0479	protein of unknown function DUF55	12	17.7473	17.039	16.1701		15.537	15.4695				17.7473	17.039	16.1701	11.7759	15.537	15.4695	10.3392	11.0355			0.0531833
Clo1313_0480	DNA methylase N-4/N-6 domain protein	28	16.9121	17.9272	18.1558		16.4238	16.8115	15.5072	13.0861		16.9121	17.9272	18.1558	14.137	16.4238	16.8115	15.5072	13.0861			0.413819
Clo1313_0482	regulatory protein DeoR	26	15.8464	13.906	16.5783		16.242	17.3147	15.1674	15.3444		15.8464	13.906	16.5783	11.1551	16.242	17.3147	15.1674	15.3444			0.609017
Clo1313_0489	glucokinase, ROK family	25	19.828	18.2159	19.6321	18.4295	18.2113	19.7276	18.6993	19.1003		19.828	18.2159	19.6321	18.4295	18.2113	19.7276	18.6993	19.1003			0.998651
Clo1313_0491	transcriptional regulator, CarD family	9					15.7643		13.0604	14.4237		14.1245	10.1319	11.262	12.803	15.7643	13.0632	13.0604	14.4237			0.547008
Clo1313_0496	histidine kinase	9	13.5065	14.9015			15.2015		14.6421			13.5065	14.9015	11.2897	11.8215	15.2015	12.6421	14.6421	12.4222			0.308638
Clo1313_0497	2-C-methyl-D-erythritol 2,4-cyclodiphosphate synthase (EC 4.6.1.12)	5		14.0678		14.6146		16.979	17.8784	17.4664		10.9018	14.0678	12.8414	14.6146	11.0919	16.979	17.8784	17.4664			0.311149
Clo1313_0498	prolyl-tRNA synthetase (EC 6.1.1.15)	34	21.3352	19.5029	20.6397	18.4992	20.5486	17.959	19.9499	19.179		21.3352	19.5029	20.6397	18.4992	20.5486	17.959	19.9499	19.179			0.849335
Clo1313_0505	hypothetical protein	7					14.3029	16.6224	17.3601	15.1709		11.8941	11.1365	12.6644	11.0465	14.3029	16.6224	17.3601	15.1709		+	0.0441164
Clo1313_0510	extracellular solute-binding protein family 5	36	20.9292	20.0733	19.7813	20.6114			20.4635	18.2793		20.9292	20.0733	19.7813	20.6114	12.1926	13.1422	20.4635	18.2793		+	0.00314035
Clo1313_0511	oligopeptide/dipeptide ABC transporter, ATPase subunit	20	18.1299	15.9335	18.3445	17.4377			17.3323	16.3882		18.1299	15.9335	18.3445	17.4377	12.4887	10.7341	17.3323	16.3882		+	0.0144658
Clo1313_0512	oligopeptide/dipeptide ABC transporter, ATPase subunit	16	19.119	19.5927	19.9412	20.666			19.6724	17.6301		19.119	19.5927	19.9412	20.666	9.7713	12.0037	19.6724	17.6301		+	0.00329222
Clo1313_0513	binding-protein-dependent transport systems inner membrane component	9	16.9942	18.7576	17.6692	18.8723			17.4945	14.8481		16.9942	18.7576	17.6692	18.8723	13.173	12.362	17.4945	14.8481		+	0.0346926
Clo1313_0514	binding-protein-dependent transport systems inner membrane component	8	19.0639	17.0501	17.8648	17.9575			17.9098			19.0639	17.0501	17.8648	17.9575	12.7006	12.8252	17.9098	11.6062			0.206916
Clo1313_0519	ABC transporter related protein	20	15.8387	16.3484	17.8859	18.2355	16.0974	18.3239	19.1095	18.1999		15.8387	16.3484	17.8859	18.2355	16.0974	18.3239	19.1095	18.1999			0.144818
Clo1313_0521	glycoside hydrolase family 11	7					14.602	13.1015		15.0052		12.7134	10.8165	11.7776	10.9912	14.602	13.1015	11.1412	15.0052			0.485255
Clo1313_0523	sugar fermentation stimulation protein	10	11.6356		13.6166	15.8354			16.3921			11.6356	11.7299	13.6166	15.8354	11.3011	11.8396	16.3921	10.612			0.493509
Clo1313_0532	methyl-accepting chemotaxis sensory transducer	10	13.8777	12.4158	14.5555		12.9635	14.772	14.5105	13.981		13.8777	12.4158	14.5555	12.5603	12.9635	14.772	14.5105	13.981			0.786353
Clo1313_0539	glycosyltransferase 36	64	21.3957	19.9952	20.8598	21.4351	20.5963	22.4206	21.8031	21.0888		21.3957	19.9952	20.8598	21.4351	20.5963	22.4206	21.8031	21.0888			0.786686
Clo1313_0545	hypothetical protein	13	11.0099		12.8358	12.3792			13.0761	13.0262		11.0099	10.394	12.8358	12.3792	10.2675	10.877	13.0761	13.0262		+	0.00401838
Clo1313_0547	intracellular protease, PfpI family	9					13.7409	14.99				10.1877	13.2197	13.7	11.6878	13.7409	14.99	12.6909	11.1167			0.375539
Clo1313_0549	ABC transporter related protein	22	16.966	15.7993	17.9504	21.5203	17.551	18.873	20.215	20.2786		16.966	15.7993	17.9504	21.5203	17.551	18.873	20.215	20.2786			0.154919
Clo1313_0552	putative phosphate transport regulator	15	19.6447	18.4969	20.2897	20.8624	19.5367	20.2105	20.0251	19.7124		19.6447	18.4969	20.2897	20.8624	19.5367	20.2105	20.0251	19.7124			0.176178
Clo1313_0554	hydrogenase, Fe-only	53	18.4536	17.8114	16.6174	16.6025			16.1459	16.6148		18.4536	17.8114	16.6174	16.6025	12.0408	11.0285	16.1459	16.6148		+	0.000513325
Clo1313_0568	hydrogenase accessory protein HypB	14	15.8349		17.8545	19.9408	16.8581	17.379	17.7583	16.6239		15.8349	14.0122	17.8545	19.9408	16.8581	17.379	17.7583	16.6239			0.0873345
Clo1313_0570	4Fe-4S ferredoxin iron-sulfur binding domain-containing protein	3			16.5318	13.3521						10.4972	12.8622	16.5318	13.3521	11.2722	10.676	10.259	11.7732			0.151176
Clo1313_0571	ech hydrogenase subunit E	29	15.4134		18.5616	19.8604	18.6034	18.9178	19.3101	18.5783		15.4134	13.1366	18.5616	19.8604	18.6034	18.9178	19.3101	18.5783		+	0.0185739
Clo1313_0572	ech hydrogenase subunit D	3				20.0241	19.2983	20.1736		19.3655		12.1754	12.6601	12.7403	20.0241	19.2983	20.1736	9.98164	19.3655			0.455386
Clo1313_0573	NADH ubiquinone oxidoreductase 20 kDa subunit	5			17.4163	15.852	15.1068	15.9313	16.5905	16.8912		11.8198	11.432	17.4163	15.852	15.1068	15.9313	16.5905	16.8912		+	0.00398093
Clo1313_0578	Citrate synthase	34	21.7566	22.1804	22.5736	24.2216	21.4057	21.447	22.832	22.4449		21.7566	22.1804	22.5736	24.2216	21.4057	21.447	22.832	22.4449			0.114346
Clo1313_0581	methyl-accepting chemotaxis sensory transducer with Cache sensor	4	13.025	17.1175		12.3248		15.1838		16.7564		13.025	17.1175	11.0623	12.3248	11.4374	15.1838	11.213	16.7564			0.698116
Clo1313_0586	D-isomer specific 2-hydroxyacid dehydrogenase NAD-binding protein	32	23.321	24.1103	21.9115	24.647	21.0371	21.3304	22.0848	23.1688		23.321	24.1103	21.9115	24.647	21.0371	21.3304	22.0848	23.1688			0.244217
Clo1313_0587	methyl-accepting chemotaxis sensory transducer	34	20.0559	18.7035	18.8564	17.0659			16.1708	16.0039		20.0559	18.7035	18.8564	17.0659	12.346	11.2736	16.1708	16.0039		+	0.00385234
Clo1313_0588	nitroreductase	7	14.6937		17.7816	18.0204			15.1871			14.6937	10.935	17.7816	18.0204	12.1637	11.3336	15.1871	12.2839			0.0775205
Clo1313_0600	Tetratricopeptide TPR_1 repeat-containing protein	15	14.6733	11.2726								14.6733	11.2726	10.8692	10.5293	10.2156	11.8993	11.4676	12.2418			0.454073
Clo1313_0612	hypothetical protein	14					15.8923	15.5509				12.8927	12.1371	12.5342	11.5628	15.8923	15.5509	13.0233	12.9031		+	0.0042502
Clo1313_0613	Cephalosporin-C deacetylase	17			15.6687		18.6721	15.5344	16.1113			12.1782	11.4003	15.6687	10.4975	18.6721	15.5344	16.1113	10.3292			0.418447
Clo1313_0615	hypothetical protein	9	14.5564	14.3637	12.6366			10.0418	15.0601	14.9596		14.5564	14.3637	12.6366	13.0723	12.4305	10.0418	15.0601	14.9596		+	0.0379338
Clo1313_0616	ABC transporter related protein	10	18.0769	16.061	14.8525		16.0046		17.7925			18.0769	16.061	14.8525	11.7699	16.0046	11.0802	17.7925	12.2095			0.602463
Clo1313_0619	two component transcriptional regulator, winged helix family	7	17.3759	17.4551	13.4051	17.3887	17.7941	18.7864	18.1624	17.2316		17.3759	17.4551	13.4051	17.3887	17.7941	18.7864	18.1624	17.2316			0.359643
Clo1313_0622	acyl-ACP thioesterase	10					16.1196	16.3483	17.0404	16.7221		12.6042	13.0162	12.0236	11.4384	16.1196	16.3483	17.0404	16.7221		+	0.000138538
Clo1313_0626	Radical SAM domain protein	14	17.4401	17.6945	17.5963	16.9398	17.9035	18.5795	17.7091	18.3269		17.4401	17.6945	17.5963	16.9398	17.9035	18.5795	17.7091	18.3269			0.218475
Clo1313_0627	cellulosome anchoring protein cohesin region	49	19.0324	17.4261	20.4935	22.8793	24.5838	23.5385	18.6755	22.1786		19.0324	17.4261	20.4935	22.8793	24.5838	23.5385	18.6755	22.1786			0.0935014
Clo1313_0628	cellulosome anchoring protein cohesin region	36	13.6605	13.815	16.9652	18.3086	19.982	19.1004	17.8622	18.3621		13.6605	13.815	16.9652	18.3086	19.982	19.1004	17.8622	18.3621		+	0.00256254
Clo1313_0629	cellulosome anchoring protein cohesin region	43	16.2168	14.6818	19.95	21.1249	22.4993	22.1122	21.52	23.0521		16.2168	14.6818	19.95	21.1249	22.4993	22.1122	21.52	23.0521		+	0.00411163
Clo1313_0630	cellulosome anchoring protein cohesin region	35	17.5918	16.8516	21.1328	21.3399	22.3523	22.2634	21.8995	22.4675		17.5918	16.8516	21.1328	21.3399	22.3523	22.2634	21.8995	22.4675		+	0.000327187
Clo1313_0635	response regulator receiver protein	6	14.0768		12.9664		15.1144	13.3364		9.97279		14.0768	10.5936	12.9664	11.5853	15.1144	13.3364	12.6142	9.97279			0.481062
Clo1313_0636	3-phosphoshikimate 1-carboxyvinyltransferase (EC 2.5.1.19)	17	19.0598	18.3531	18.4717	17.1411	17.9615	18.0147	19.3242	19.3851		19.0598	18.3531	18.4717	17.1411	17.9615	18.0147	19.3242	19.3851			0.126807
Clo1313_0638	histone family protein DNA-binding protein	16	22.284	20.3643	21.5534	21.2068	21.6819	20.4074	22.534	20.908		22.284	20.3643	21.5534	21.2068	21.6819	20.4074	22.534	20.908			0.9227
Clo1313_0640	hydro-lyase, Fe-S type, tartrate/fumarate subfamily, alpha subunit	19	13.2489	15.6427	12.3461	12.0392	12.7721	14.5346	14.0368	13.8796		13.2489	15.6427	12.3461	12.0392	12.7721	14.5346	14.0368	13.8796			0.307354
Clo1313_0641	hydro-lyase, Fe-S type, tartrate/fumarate subfamily, beta subunit	11	18.5222	18.3683	17.9677	17.9784	17.9671	19.4565	19.3902	19.3526		18.5222	18.3683	17.9677	17.9784	17.9671	19.4565	19.3902	19.3526			0.205397
Clo1313_0642	Domain of unknown function DUF1858	5	19.2728	18.7836	18.6249	19.6896	18.6622	19.6229	20.4883	18.419		19.2728	18.7836	18.6249	19.6896	18.6622	19.6229	20.4883	18.419			0.967371
Clo1313_0643	Adenylosuccinate synthetase (EC 6.3.4.4)	45	19.6173	19.6279	21.007	21.46	21.8237	22.5585	21.9935	22.4221		19.6173	19.6279	21.007	21.46	21.8237	22.5585	21.9935	22.4221		+	0.00456415
Clo1313_0645	glycosyl transferase family 2	23	19.2502	18.5632	19.3416	17.3738	17.0197	17.086	18.3071	18.2031		19.2502	18.5632	19.3416	17.3738	17.0197	17.086	18.3071	18.2031			0.225977
Clo1313_0646	glycosyl transferase family 39	28	19.0292	18.8486	19.0823	17.7674	18.3527	18.3499	19.4822	19.2362		19.0292	18.8486	19.0823	17.7674	18.3527	18.3499	19.4822	19.2362			0.261835
Clo1313_0647	hypothetical protein	24	21.4893	20.55	21.6293	19.816	20.6807	20.1456	21.5704	20.4666		21.4893	20.55	21.6293	19.816	20.6807	20.1456	21.5704	20.4666			0.867166
Clo1313_0648	glycosyl transferase family 2	10	17.3384	17.8664	16.7536	16.9237	17.9372	17.5609	17.599	17.5847		17.3384	17.8664	16.7536	16.9237	17.9372	17.5609	17.599	17.5847			0.0579569
Clo1313_0652	LL-diaminopimelate aminotransferase apoenzyme (EC 2.6.1.83)	29	17.0447	16.1349	18.0048	17.6513	20.7542	16.7623	19.7141	17.6415		17.0447	16.1349	18.0048	17.6513	20.7542	16.7623	19.7141	17.6415			0.5691
Clo1313_0656	preQ(0) biosynthesis protein QueC	10	20.0903	20.7369	20.6619	20.7891	20.9727	21.7467	22.2024	21.7647		20.0903	20.7369	20.6619	20.7891	20.9727	21.7467	22.2024	21.7647			0.0531298
Clo1313_0658	Radical SAM domain protein	13			16.6924	15.7801	16.2861	17.7357	17.3204	16.5345		12.7337	13.4508	16.6924	15.7801	16.2861	17.7357	17.3204	16.5345		+	0.0147693
Clo1313_0660	Uracil-DNA glycosylase superfamily	7	17.295	12.0314	15.9297		17.7004	14.3491	15.2436	13.4067		17.295	12.0314	15.9297	12.7689	17.7004	14.3491	15.2436	13.4067			0.892849
Clo1313_0663	hypothetical protein	6	15.6571	14.9657	15.8139	15.502			18.3281			15.6571	14.9657	15.8139	15.502	11.6435	13.2742	18.3281	11.1314			0.647192
Clo1313_0667	glycosyl transferase group 1	10	16.7379	16.8309					16.3013			16.7379	16.8309	11.5379	12.3051	10.2626	11.9791	16.3013	12.0355			0.0830421
Clo1313_0671	hemerythrin-like metal-binding protein	3	20.6533	19.3936	17.9454		18.6382	20.5327	19.6984			20.6533	19.3936	17.9454	12.4091	18.6382	20.5327	19.6984	12.5417			0.448973
Clo1313_0672	flavin reductase domain protein FMN-binding protein	12	18.336	18.197	17.4457	17.663	17.1573	17.8949	17.8774	17.834		18.336	18.197	17.4457	17.663	17.1573	17.8949	17.8774	17.834			0.151483
Clo1313_0673	pyruvate ferredoxin/flavodoxin oxidoreductase	107	23.4568	23.1377	24.0477	22.7925	24.3887	22.9315	24.5808	23.1381		23.4568	23.1377	24.0477	22.7925	24.3887	22.9315	24.5808	23.1381			0.910888
Clo1313_0675	S-layer domain-containing protein	19	17.2028	16.8319	16.9842	15.2396	19.4168	19.9417	18.5343	18.3312		17.2028	16.8319	16.9842	15.2396	19.4168	19.9417	18.5343	18.3312		+	0.0202185
Clo1313_0677	AMP-dependent synthetase and ligase	42	21.3936	21.1602	21.2654	20.327	20.3655	20.4207	21.5941	21.1673		21.3936	21.1602	21.2654	20.327	20.3655	20.4207	21.5941	21.1673			0.159564
Clo1313_0684	von Willebrand factor type A	29	18.0025	17.3377	17.5774	15.6992	19.2118	18.2949	17.958	17.9172		18.0025	17.3377	17.5774	15.6992	19.2118	18.2949	17.958	17.9172			0.195526
Clo1313_0694	hypothetical protein	16	18.136	18.6787	19.0257	18.5042	19.3473	19.774	19.1934	19.1028		18.136	18.6787	19.0257	18.5042	19.3473	19.774	19.1934	19.1028			0.0723576
Clo1313_0698	ABC transporter related protein	13	13.3387	14.759				15.5835	12.5879			13.3387	14.759	10.2049	10.3917	11.4804	15.5835	12.5879	12.3732			0.215589
Clo1313_0699	ABC transporter related protein	14	15.7714	13.7753	12.0412			15.6928	15.6062			15.7714	13.7753	12.0412	12.1975	11.5143	15.6928	15.6062	13.9522			0.461993
Clo1313_0700	aminoacyl-histidine dipeptidase	13	15.2421	17.4771	15.5777		16.2463	17.523	16.2043			15.2421	17.4771	15.5777	11.1151	16.2463	17.523	16.2043	10.3779			0.487842
Clo1313_0701	cobalamin biosynthesis protein CobD	11	17.6214	18.9029		16.067	17.4141	20.1195	17.8368	18.326		17.6214	18.9029	12.7106	16.067	17.4141	20.1195	17.8368	18.326			0.147504
Clo1313_0706	beta-lactamase superfamily hydrolase	20	19.9113	19.4367	18.5866	19.3716	22.2002	23.3749	20.1416	20.3911		19.9113	19.4367	18.5866	19.3716	22.2002	23.3749	20.1416	20.3911		+	0.00766496
Clo1313_0707	methyl-accepting chemotaxis sensory transducer	25	21.0744	21.2057	20.7165	19.2718	17.3394	18.7124	21.5545	19.8196		21.0744	21.2057	20.7165	19.2718	17.3394	18.7124	21.5545	19.8196			0.0958556
Clo1313_0708	pyruvate carboxyltransferase	36	20.0413	18.7214	20.1267	19.795	19.5726	17.5679	20.5746	19.9988		20.0413	18.7214	20.1267	19.795	19.5726	17.5679	20.5746	19.9988			0.351208
Clo1313_0709	aconitase (EC 4.2.1.3)	39	22.7572	22.0402	23.3646	21.1863	22.203	21.2015	22.3728	21.5955		22.7572	22.0402	23.3646	21.1863	22.203	21.2015	22.3728	21.5955			0.873923
Clo1313_0710	transcriptional regulator, GntR family	12	13.547	13.5682	13.1412				14.3544			13.547	13.5682	13.1412	12.7178	11.4077	10.7475	14.3544	13.3414		+	0.012022
Clo1313_0714	Carbohydrate binding family 25	13	21.4894	22.4178	20.7326	18.4187	22.4417	22.3009	20.2085	20.6297		21.4894	22.4178	20.7326	18.4187	22.4417	22.3009	20.2085	20.6297			0.0974433
Clo1313_0715	two component transcriptional regulator, AraC family	28	19.3243	19.3771	18.528	18.2449	16.6697	15.8719	19.1772	19.2936		19.3243	19.3771	18.528	18.2449	16.6697	15.8719	19.1772	19.2936		+	0.0015774
Clo1313_0716	PpiC-type peptidyl-prolyl cis-trans isomerase	21	15.9275	17.0428	16.8536	14.6163	17.1171	19.6047	14.4261	18.8772		15.9275	17.0428	16.8536	14.6163	17.1171	19.6047	14.4261	18.8772			0.642909
Clo1313_0717	glucose-1-phosphate adenylyltransferase	18	19.0205	18.8951	17.3206	16.7997	16.6025	16.6429	18.3064	17.0742		19.0205	18.8951	17.3206	16.7997	16.6025	16.6429	18.3064	17.0742		+	0.0290605
Clo1313_0718	glucose-1-phosphate adenylyltransferase, GlgD subunit	19	18.8939	16.0523	16.6109	15.2929		16.8387	17.1517	15.165		18.8939	16.0523	16.6109	15.2929	11.2159	16.8387	17.1517	15.165			0.594134
Clo1313_0719	diacylglycerol kinase catalytic region	10	15.8432	16.4201	14.2003			17.6173	17.6775	15.5392		15.8432	16.4201	14.2003	10.3379	11.0977	17.6173	17.6775	15.5392			0.480381
Clo1313_0720	Enoyl-[acyl-carrier-protein] reductase [NADH] (EC 1.3.1.9)	14	20.5728	21.3392	19.6223	20.1368	21.561	22.4747	20.2269	21.3734		20.5728	21.3392	19.6223	20.1368	21.561	22.4747	20.2269	21.3734			0.103461
Clo1313_0729	protein of unknown function DUF342	29	18.5201	17.8224	18.5845	16.6574	19.5356	16.909	19.1466	17.4389		18.5201	17.8224	18.5845	16.6574	19.5356	16.909	19.1466	17.4389			0.950861
Clo1313_0732	TrkA-N domain protein	14	15.8976		15.0811		15.0824	14.7159	15.266			15.8976	11.329	15.0811	11.5796	15.0824	14.7159	15.266	10.8354			0.890243
Clo1313_0737	copper amine oxidase-like domain-containing protein	9	14.2509	13.2755			12.4904	13.3978				14.2509	13.2755	13.6079	12.0215	12.4904	13.3978	12.8707	12.5733			0.542256
Clo1313_0739	helicase, RecD/TraA family	2			18.3573	18.8869			15.9028			11.7393	12.2902	18.3573	18.8869	11.8038	11.357	15.9028	10.4154			0.0668575
Clo1313_0740	hypothetical protein	21	18.9883	18.3736	18.9812	17.6442	20.1355	19.6784	19.466	18.853		18.9883	18.3736	18.9812	17.6442	20.1355	19.6784	19.466	18.853			0.176108
Clo1313_0745	Uncharacterized conserved protein UCP033563	26	18.3322	17.3324	17.7368	17.4367	17.6297	18.69	18.0156	19.0387		18.3322	17.3324	17.7368	17.4367	17.6297	18.69	18.0156	19.0387			0.547969
Clo1313_0749	alanyl-tRNA synthetase (EC 6.1.1.7)	64	20.4486	20.4285	19.3748	18.3329	19.285	19.4041	19.4805	18.793		20.4486	20.4285	19.3748	18.3329	19.285	19.4041	19.4805	18.793			0.0796895
Clo1313_0755	hypothetical protein	21	15.9089	15.9366	14.8081	15.9267	16.9083	15.985	16.424	16.9617		15.9089	15.9366	14.8081	15.9267	16.9083	15.985	16.424	16.9617			0.217332
Clo1313_0757	hypothetical protein	21	17.8075	17.7027	18.2681	17.3964	15.1539		16.6811	18.7405		17.8075	17.7027	18.2681	17.3964	15.1539	11.4392	16.6811	18.7405			0.0979936
Clo1313_0758	protein of unknown function DUF324	10	14.327	12.1514	15.1474	12.203	13.1919			14.5901		14.327	12.1514	15.1474	12.203	13.1919	13.6372	10.6067	14.5901			0.947197
Clo1313_0759	hypothetical protein	5							18.0949	16.81		11.3437	12.2554	12.0421	11.6638	10.9458	12.3996	18.0949	16.81		+	0.00402243
Clo1313_0762	CRISPR-associated protein, TIGR02710 family	16	14.7468	13.1608	13.3049	11.8003	16.3369		14.4259	11.707		14.7468	13.1608	13.3049	11.8003	16.3369	11.3371	14.4259	11.707			0.898712
Clo1313_0778	copper amine oxidase-like domain-containing protein	3	15.1839	11.4193	14.5418		16.7637		14.4055			15.1839	11.4193	14.5418	11.7683	16.7637	10.9116	14.4055	10.5301			0.972126
Clo1313_0779	copper amine oxidase-like domain-containing protein	4	17.7674	19.1266	18.823	17.1096	19.3321	19.4882	18.5375	19.5928		17.7674	19.1266	18.823	17.1096	19.3321	19.4882	18.5375	19.5928			0.441587
Clo1313_0780	copper amine oxidase-like domain-containing protein	3	18.7074	17.0259	16.7816	16.6268	17.6385	16.5328	18.7914	17.7234		18.7074	17.0259	16.7816	16.6268	17.6385	16.5328	18.7914	17.7234			0.333366
Clo1313_0781	hypothetical protein	51	19.086	18.8293	18.7397	14.4582	18.7561	16.2916	19.4721			19.086	18.8293	18.7397	14.4582	18.7561	16.2916	19.4721	11.8874			0.772655
Clo1313_0793	amino acid ABC transporter substrate-binding protein, PAAT family (TC 3.A.1.3.-)	21	20.2074	20.1331	20.1427	19.5017	18.9304	18.5886	20.6272	20.8345		20.2074	20.1331	20.1427	19.5017	18.9304	18.5886	20.6272	20.8345		+	0.00778859
Clo1313_0795	amino acid ABC transporter ATP-binding protein, PAAT family (TC 3.A.1.3.-)	6	16.4903	16.9417					16.6819			16.4903	16.9417	10.9999	11.0441	10.7001	11.491	16.6819	13.2102		+	0.024583
Clo1313_0799	hypothetical protein	31	21.0818	20.1742	20.2479		15.1017		21.8686			21.0818	20.1742	20.2479	12.5623	15.1017	10.1657	21.8686	10.9614			0.538637
Clo1313_0804	hypothetical protein	4	15.4689	15.9364	12.6088	15.5192	16.9283	16.7695	13.0266	16.8562		15.4689	15.9364	12.6088	15.5192	16.9283	16.7695	13.0266	16.8562			0.49484
Clo1313_0805	TIR protein	27	19.8594	18.8493	19.5983	18.3669	19.5259	17.5695	18.5372	18.3603		19.8594	18.8493	19.5983	18.3669	19.5259	17.5695	18.5372	18.3603			0.739198
Clo1313_0815	short-chain dehydrogenase/reductase SDR	14	22.3466	23.3701	21.7898	22.4326	19.7985	21.958	22.4194	22.8302		22.3466	23.3701	21.7898	22.4326	19.7985	21.958	22.4194	22.8302			0.258522
Clo1313_0817	hypothetical protein	9	15.106	12.7203	16.1127	12.408	13.7176	14.1319	14.2597	10.8743		15.106	12.7203	16.1127	12.408	13.7176	14.1319	14.2597	10.8743			0.831377
Clo1313_0829	signal peptide peptidase SppA, 36K type	12	16.8587	11.0114	14.0431				14.9451			16.8587	11.0114	14.0431	11.2793	11.0978	11.7832	14.9451	11.57			0.802758
Clo1313_0836	tryptophan synthase, beta chain (EC 4.2.1.20)	18	19.3422	19.2102	17.7138	19.0364	18.1603	17.1019	18.0537	18.4694		19.3422	19.2102	17.7138	19.0364	18.1603	17.1019	18.0537	18.4694			0.208273
Clo1313_0837	tryptophan synthase, alpha chain (EC 4.2.1.20)	8	19.1267	17.5287	17.3244		18.0436		17.1434			19.1267	17.5287	17.3244	10.9475	18.0436	12.4249	17.1434	10.3461			0.663914
Clo1313_0848	hypothetical protein	6	17.551				18.1425	15.3603	19.0133			17.551	13.757	12.0688	10.977	18.1425	15.3603	19.0133	10.5153			0.534883
Clo1313_0850	C_GCAxxG_C_C family protein	5	13.6751	16.3619	15.8617			18.0158	16.1926			13.6751	16.3619	15.8617	10.6676	10.9971	18.0158	16.1926	10.4593			0.952979
Clo1313_0851	Dockerin type 1	12					16.9325	17.1371				10.6132	10.4331	10.8397	12.2178	16.9325	17.1371	11.4319	10.6617		+	0.000965967
Clo1313_0857	2-isopropylmalate synthase (EC 2.3.3.13)	42	21.3598	20.7288	22.2345	19.4561	20.1774	16.6835	20.7939	18.194		21.3598	20.7288	22.2345	19.4561	20.1774	16.6835	20.7939	18.194			0.519199
Clo1313_0863	protein translocase subunit secA	75	21.0352	20.5193	20.4308	18.7837	22.5796	20.8509	20.0388	19.7399		21.0352	20.5193	20.4308	18.7837	22.5796	20.8509	20.0388	19.7399			0.208628
Clo1313_0864	FolC bifunctional protein	20	15.828	15.3946	14.2324		18.9762	18.2698	16.0191	16.4933		15.828	15.3946	14.2324	11.54	18.9762	18.2698	16.0191	16.4933		+	0.0214062
Clo1313_0865	Tetratricopeptide TPR_1 repeat-containing protein	36	15.5283	15.8103	13.7887	12.6248	17.6652	17.2065	15.6146	15.8366		15.5283	15.8103	13.7887	12.6248	17.6652	17.2065	15.6146	15.8366		+	0.0036624
Clo1313_0867	L-threonine synthase (EC 4.2.3.1)	31	20.3604	20.2149	19.8622	19.3531	21.5097	20.6382	21.5877	20.1255		20.3604	20.2149	19.8622	19.3531	21.5097	20.6382	21.5877	20.1255			0.234745
Clo1313_0870	response regulator receiver modulated metal dependent phosphohydrolase	22	17.6462	20.1151	14.2925				14.9429			17.6462	20.1151	14.2925	11.0142	12.3173	12.2827	14.9429	11.1407			0.0773954
Clo1313_0872	homoserine dehydrogenase (EC 1.1.1.3)	28	17.7881	16.8241	16.656	15.792	17.3624	16.9416	16.7312	16.5956		17.7881	16.8241	16.656	15.792	17.3624	16.9416	16.7312	16.5956			0.247308
Clo1313_0873	aspartate kinase (EC 2.7.2.4)	28	19.5093	19.842	18.7434	19.3148	18.6608	19.4428	19.4332	19.6744		19.5093	19.842	18.7434	19.3148	18.6608	19.4428	19.4332	19.6744			0.317473
Clo1313_0874	copper amine oxidase-like domain-containing protein	4		13.6234	12.9621	10.82		12.4889				11.8111	13.6234	12.9621	10.82	11.9889	12.4889	12.1869	13.1304			0.847032
Clo1313_0875	YD repeat protein	43	13.2278	12.1452	12.6075	12.3385	14.6037	14.3991	13.5344	11.4755		13.2278	12.1452	12.6075	12.3385	14.6037	14.3991	13.5344	11.4755			0.175114
Clo1313_0876	hypothetical protein	8	18.145	19.2687	17.7255	17.7458	19.7994	19.4424	17.0761	19.0966		18.145	19.2687	17.7255	17.7458	19.7994	19.4424	17.0761	19.0966			0.256865
Clo1313_0880	YD repeat protein	83	16.2105	15.9586	15.6125	13.7426	16.1119	16.01	16.7038	15.5332		16.2105	15.9586	15.6125	13.7426	16.1119	16.01	16.7038	15.5332			0.320097
Clo1313_0883	histidine triad (HIT) protein	7	17.869	19.5387	19.4609	19.9106	18.7299	20.9275	21.1457	21.2336		17.869	19.5387	19.4609	19.9106	18.7299	20.9275	21.1457	21.2336			0.238328
Clo1313_0884	S-layer domain-containing protein	49	18.9453	19.3352	20.8274	20.5964	24.0123	22.4859	21.2289	21.5362		18.9453	19.3352	20.8274	20.5964	24.0123	22.4859	21.2289	21.5362		+	0.00905931
Clo1313_0887	dTDP-4-dehydrorhamnose 3,5-epimerase	6	17.1291		16.9156		16.1407	18.0324	14.6431	17.3321		17.1291	11.8506	16.9156	11.4244	16.1407	18.0324	14.6431	17.3321			0.744047
Clo1313_0889	hypothetical protein	5					14.0263	13.8498				12.8182	10.0728	11.9671	11.3132	14.0263	13.8498	11.6839	13.0117			0.242901
Clo1313_0890	capsular exopolysaccharide family	25	19.6907	19.0372	19.2545	18.212	18.1678	19.9744	18.3209	19.4342		19.6907	19.0372	19.2545	18.212	18.1678	19.9744	18.3209	19.4342			0.892933
Clo1313_0892	NAD-dependent epimerase/dehydratase	18	20.1477	19.9748	19.2851	18.2918	18.3426	20.9477	19.0673	19.3266		20.1477	19.9748	19.2851	18.2918	18.3426	20.9477	19.0673	19.3266			0.639615
Clo1313_0893	Oligosaccharide biosynthesis protein Alg14 like protein	3	15.0934	14.6864	14.4838		15.6565	17.4173		17.075		15.0934	14.6864	14.4838	11.6774	15.6565	17.4173	11.9767	17.075			0.527125
Clo1313_0894	Glycosyltransferase 28 domain	8	14.6216		15.39		14.8684	13.6599	15.5773			14.6216	11.2509	15.39	11.1243	14.8684	13.6599	15.5773	11.9319			0.942316
Clo1313_0896	glycosyl transferase group 1	16	18.0357	17.0397	17.5867		14.8314	14.533	16.9524	14.5052		18.0357	17.0397	17.5867	11.4582	14.8314	14.533	16.9524	14.5052			0.604015
Clo1313_0897	glycosyltransferase	14	18.6431	19.1975	17.7188	15.9104	18.2829	18.4925	18.1384	17.0822		18.6431	19.1975	17.7188	15.9104	18.2829	18.4925	18.1384	17.0822			0.168416
Clo1313_0898	glycosyl transferase family 2	13	17.4922	17.579	17.0732	16.4166		17.2955	16.2467	17.1709		17.4922	17.579	17.0732	16.4166	12.0774	17.2955	16.2467	17.1709			0.542644
Clo1313_0901	UDP-glucose dehydrogenase	39	20.7715	19.5567	21.1907	19.868	21.2639	20.9484	21.4589	20.5881		20.7715	19.5567	21.1907	19.868	21.2639	20.9484	21.4589	20.5881			0.569987
Clo1313_0903	single-strand binding protein	11	17.0447	17.8856	17.1658	17.5243	19.939	19.7139	18.6357	18.6691		17.0447	17.8856	17.1658	17.5243	19.939	19.7139	18.6357	18.6691		+	0.00494254
Clo1313_0904	exopolysaccharide biosynthesis polyprenyl glycosylphosphotransferase	11	14.8525	14.5271	14.4836		14.0493	15.3239	15.2567	12.929		14.8525	14.5271	14.4836	11.9194	14.0493	15.3239	15.2567	12.929			0.66099
Clo1313_0905	SSU ribosomal protein S21P	4	21.2474	20.6267	17.5319	18.0663			17.6339	18.7438		21.2474	20.6267	17.5319	18.0663	11.0889	13.2042	17.6339	18.7438		+	0.0026157
Clo1313_0906	GatB/YqeY domain protein	13	14.5851	12.8706	12.6901	11.2112	13.8281	13.7565	14.3993	14.4382		14.5851	12.8706	12.6901	11.2112	13.8281	13.7565	14.3993	14.4382			0.128267
Clo1313_0908	adenine phosphoribosyltransferase (EC 2.4.2.7)	7	20.0563	20.9143	19.9	17.9351	16.7722	18.9496	19.1299	18.18		20.0563	20.9143	19.9	17.9351	16.7722	18.9496	19.1299	18.18			0.272502
Clo1313_0909	(p)ppGpp synthetase I, SpoT/RelA	12	11.7143	12.8455	12.2926				12.7192			11.7143	12.8455	12.2926	13.0893	12.3272	11.6772	12.7192	11.7194			0.762981
Clo1313_0911	beta-lactamase-like protein	3	17.0401	16.0531	17.0239				16.7784			17.0401	16.0531	17.0239	13.5273	9.98553	12.981	16.7784	11.9805			0.315191
Clo1313_0912	Coproporphyrinogen dehydrogenase	6	16.6199	9.92719	15.8656				18.7203			16.6199	9.92719	15.8656	10.7857	9.9103	13.0047	18.7203	11.1563			0.867612
Clo1313_0913	hypothetical protein	16	16.3906	16.2846	13.4752	13.7926	15.5994	16.9375	14.3457	11.4655		16.3906	16.2846	13.4752	13.7926	15.5994	16.9375	14.3457	11.4655			0.0781541
Clo1313_0914	type II secretion system protein E	17					13.5755	14.3519				11.666	11.9262	12.3027	10.9393	13.5755	14.3519	13.0573	10.8654			0.188195
Clo1313_0920	Forkhead-associated protein	12	15.0376	14.3287		11.2527	16.845			11.3851		15.0376	14.3287	10.4105	11.2527	16.845	12.4449	12.6742	11.3851			0.182367
Clo1313_0922	histidyl-tRNA synthetase (EC 6.1.1.21)	31	18.632	18.0538	17.9694	17.6664	16.8602	18.1332	17.2753	17.5856		18.632	18.0538	17.9694	17.6664	16.8602	18.1332	17.2753	17.5856			0.390913
Clo1313_0923	aspartyl-tRNA synthetase (EC 6.1.1.12)	33	16.5091	17.5352	13.7768	15.6103	13.4596	17.4684	14.9551	16.7495		16.5091	17.5352	13.7768	15.6103	13.4596	17.4684	14.9551	16.7495			0.630101
Clo1313_0925	CoA-substrate-specific enzyme activase	45	16.1226	15.7745	15.802	14.6187	16.0401	14.8409	15.4837	10.6318		16.1226	15.7745	15.802	14.6187	16.0401	14.8409	15.4837	10.6318			0.485072
Clo1313_0929	GTP-binding protein LepA	19	15.7714	13.1491	16.138	15.4819			15.7444	15.3029		15.7714	13.1491	16.138	15.4819	11.5139	12.2919	15.7444	15.3029			0.0545636
Clo1313_0931	heat-inducible transcription repressor HrcA	8		12.9128	15.8244				12.6508	14.4491		11.9742	12.9128	15.8244	11.5459	11.6741	12.6127	12.6508	14.4491			0.752857
Clo1313_0933	chaperone protein DnaK	47	19.8299	19.4667	20.0581	19.7683	20.6534	18.7517	19.9107	19.3624		19.8299	19.4667	20.0581	19.7683	20.6534	18.7517	19.9107	19.3624			0.976145
Clo1313_0934	chaperone protein DnaJ	15	17.3664	17.1271	18.979	14.9671	18.3324	18.2249	18.3849	16.4444		17.3664	17.1271	18.979	14.9671	18.3324	18.2249	18.3849	16.4444			0.854561
Clo1313_0935	[LSU ribosomal protein L11P]-lysine N-methyltransferase (EC 2.1.1.-)	15	19.1227	17.6575	19.1486	16.0038	17.6147	18.602	18.9759	18.4169		19.1227	17.6575	19.1486	16.0038	17.6147	18.602	18.9759	18.4169			0.843251
Clo1313_0939	YicC-like domain-containing protein	18	17.8539	16.9965	16.2619	17.0062	16.5932	19.0483	18.4398	18.2648		17.8539	16.9965	16.2619	17.0062	16.5932	19.0483	18.4398	18.2648			0.433869
Clo1313_0940	protein of unknown function DUF370	8	22.6722	22.8334	21.5381	22.3906	22.6341	23.1691	23.7083	23.2129		22.6722	22.8334	21.5381	22.3906	22.6341	23.1691	23.7083	23.2129			0.0832418
Clo1313_0941	guanylate kinase (EC 2.7.4.8)	10	16.4945	15.137	17.8859	18.0595		18.3725	16.7561	17.2273		16.4945	15.137	17.8859	18.0595	11.4558	18.3725	16.7561	17.2273			0.662015
Clo1313_0942	DNA-directed RNA polymerase subunit omega (EC 2.7.7.6)	7	17.1109	16.0316	17.5673			15.6828	14.1707			17.1109	16.0316	17.5673	11.0993	11.7671	15.6828	14.1707	12.838			0.688802
Clo1313_0943	Phosphopantothenate-cysteine ligase (EC 6.3.2.5)/Phosphopantothenoylcysteine decarboxylase (EC 4.1.1.36)	22	17.7137	17.9781	18.4191	17.6416	17.2034	18.4159	18.4988	17.724		17.7137	17.9781	18.4191	17.6416	17.2034	18.4159	18.4988	17.724			0.942067
Clo1313_0944	glycyl-tRNA synthetase (EC 6.1.1.14)	38	21.4344	20.5922	21.5803	21.1179	19.9998	20.1926	21.625	20.5344		21.4344	20.5922	21.5803	21.1179	19.9998	20.1926	21.625	20.5344			0.229076
Clo1313_0945	signal transduction histidine kinase regulating citrate/malate metabolism	12	13.6164		14.8747	15.7204			16.0068	15.2563		13.6164	12.3547	14.8747	15.7204	10.8061	11.2103	16.0068	15.2563		+	0.00484203
Clo1313_0949	pyruvate phosphate dikinase (EC 2.7.9.1)	102	23.807	22.5244	22.2136	21.1125	24.2474	23.5521	23.3901	22.4296		23.807	22.5244	22.2136	21.1125	24.2474	23.5521	23.3901	22.4296			0.142209
Clo1313_0950	cellulosome anchoring protein cohesin region	37	20.5725	21.7787	19.501	18.9717	19.5831	21.2188	20.5243	20.582		20.5725	21.7787	19.501	18.9717	19.5831	21.2188	20.5243	20.582			0.211031
Clo1313_0952	Cupin 2 conserved barrel domain protein	9	19.1494		16.2482	16.2172	20.2189	21.4762	15.8523			19.1494	11.8024	16.2482	16.2172	20.2189	21.4762	15.8523	11.8577			0.254772
Clo1313_0953	PhoH family protein	12	16.0166	11.6378	16.12							16.0166	11.6378	16.12	11.2589	10.93	13.3015	12.9937	11.9102			0.864111
Clo1313_0954	glycosyl transferase group 1	10	16.545	15.5486	15.2876		16.0929	15.0627	16.0774	14.6915		16.545	15.5486	15.2876	12.5639	16.0929	15.0627	16.0774	14.6915			0.423351
Clo1313_0955	RNA-metabolising metallo-beta-lactamase	26	17.4646	16.3407	17.7433	15.4991	16.4218	17.5532	16.9599	16.6062		17.4646	16.3407	17.7433	15.4991	16.4218	17.5532	16.9599	16.6062			0.982028
Clo1313_0960	nicotinate-nucleotide-dimethylbenzimidazole phosphoribosyltransferase (EC 2.4.2.21)	12	14.9403		15.0464		15.2182	14.0944	14.0059	10.6955		14.9403	10.7977	15.0464	10.8057	15.2182	14.0944	14.0059	10.6955			0.798434
Clo1313_0961	hypothetical protein	7	16.7289	17.266	16.3215	12.0991			16.471	15.1538		16.7289	17.266	16.3215	12.0991	11.137	12.0969	16.471	15.1538			0.100619
Clo1313_0965	metal dependent phosphohydrolase	6	16.1171	18.3656								16.1171	18.3656	12.1924	12.5329	10.6555	13.5339	11.9834	13.3979			0.0555673
Clo1313_0966	phosphoglycerate mutase (EC 5.4.2.1)	28	14.5666	13.945	16.3068	16.7092	14.2833	16.334	16.1554	16.4148		14.5666	13.945	16.3068	16.7092	14.2833	16.334	16.1554	16.4148			0.127625
Clo1313_0970	two component transcriptional regulator, winged helix family	15	17.206	15.2796	18.9705	15.2144	17.8833	15.4516	18.4103	15.8394		17.206	15.2796	18.9705	15.2144	17.8833	15.4516	18.4103	15.8394			0.961174
Clo1313_0971	integral membrane sensor signal transduction histidine kinase	6	13.4891	15.7023	10.9786				16.2098			13.4891	15.7023	10.9786	11.6681	10.9154	10.4637	16.2098	12.2657			0.157977
Clo1313_0972	peptidase S1 and S6 chymotrypsin/Hap	17	15.7597	15.7311	15.497	14.7364	14.7192	15.7982	14.7398	15.2204		15.7597	15.7311	15.497	14.7364	14.7192	15.7982	14.7398	15.2204			0.51474
Clo1313_0973	metal dependent phosphohydrolase	7	14.913	12.2291	14.6532							14.913	12.2291	14.6532	13.8977	11.312	10.5249	12.6202	10.8181			0.13569
Clo1313_0974	glycogen synthase (ADP-glucose)	30	21.5033	21.3753	21.1607	19.2791	19.6254	20.1659	20.5838	19.7498		21.5033	21.3753	21.1607	19.2791	19.6254	20.1659	20.5838	19.7498			0.310395
Clo1313_0975	DNA-(apurinic or apyrimidinic site) lyase (EC 4.2.99.18)/endonuclease III (EC 3.2.2.-)	5	14.0051	15.9024	15.4739							14.0051	15.9024	15.4739	12.0576	10.7857	12.2595	12.5335	10.4972			0.234461
Clo1313_0979	LSU ribosomal protein L28P	7	19.1674	15.8979	14.4419	14.6475			16.115			19.1674	15.8979	14.4419	14.6475	12.4971	12.596	16.115	12.2579			0.181051
Clo1313_0980	ATP-dependent DNA helicase RecG (EC 3.6.1.-)	8						12.1018	13.4794	13.1999		11.0773	11.4895	11.0897	11.4907	11.974	12.1018	13.4794	13.1999		+	0.00245624
Clo1313_0982	Phosphopantetheine adenylyltransferase (EC 2.7.7.3)	5	15.5901		16.1272		15.9558	16.7328	16.9665			15.5901	12.5707	16.1272	11.2884	15.9558	16.7328	16.9665	11.7109			0.782054
Clo1313_0983	H+-ATPase subunit H	16	18.7197	18.4029	19.4813	18.6975	18.9556	19.2259	19.3537	18.7545		18.7197	18.4029	19.4813	18.6975	18.9556	19.2259	19.3537	18.7545			0.501842
Clo1313_0988	proteinase inhibitor I4 serpin	21	16.5034	17.0655	17.2555	17.9952	16.7728	17.2674	18.7915	17.1862		16.5034	17.0655	17.2555	17.9952	16.7728	17.2674	18.7915	17.1862			0.384408
Clo1313_0989	iron-sulfur cluster-binding protein	24	18.4652	17.5328	19.0749	18.2715	16.7657	18.2905	19.2446	18.2314		18.4652	17.5328	19.0749	18.2715	16.7657	18.2905	19.2446	18.2314			0.447366
Clo1313_0990	DegS sensor signal transduction histidine kinase	2	13.6562	14.3539								13.6562	14.3539	12.1316	13.2593	9.943	12.3825	10.6384	10.8521			0.0873101
Clo1313_0991	two component transcriptional regulator, LuxR family	11	15.4589	16.7493								15.4589	16.7493	13.1794	12.1767	12.195	13.1963	13.3618	12.0878		+	0.0312672
Clo1313_0993	alpha-phosphoglucomutase (EC 5.4.2.2)	62	20.6959	20.4714	20.8483	21.0044	20.7082	22.0277	21.421	21.4399		20.6959	20.4714	20.8483	21.0044	20.7082	22.0277	21.421	21.4399			0.365954
Clo1313_0994	DNA polymerase III catalytic subunit, DnaE type	17	18.674	10.0361	18.4805	12.8029	17.769		17.9335			18.674	10.0361	18.4805	12.8029	17.769	10.7803	17.9335	11.4755			0.991214
Clo1313_0995	tryptophan RNA-binding attenuator protein	4	15.8029	13.0985		12.9219		16.9953	15.1369	16.1894		15.8029	13.0985	12.0996	12.9219	11.1579	16.9953	15.1369	16.1894			0.634902
Clo1313_0996	hypothetical protein	4			17.7002	11.9796	17.8627		19.0199	16.48		11.379	13.6575	17.7002	11.9796	17.8627	11.1111	19.0199	16.48			0.543366
Clo1313_0997	6-phosphofructokinase (EC 2.7.1.11)	29	19.3105	20.1824	20.5369	21.6573	20.8654	20.6708	21.2621	21.4648		19.3105	20.1824	20.5369	21.6573	20.8654	20.6708	21.2621	21.4648			0.113676
Clo1313_1000	copper amine oxidase-like domain-containing protein	12	17.6202	18.3743	17.3531				18.5051			17.6202	18.3743	17.3531	10.1567	10.9408	10.2956	18.5051	11.3396			0.358402
Clo1313_1001	Carbohydrate-binding CenC domain protein	26	19.7679	19.4897	18.9846				18.4811			19.7679	19.4897	18.9846	11.8475	12.0356	11.7212	18.4811	10.6597			0.349162
Clo1313_1002	glycoside hydrolase family 3 domain protein	52	19.1881	20.4488	18.1657	15.9868	14.4549		18.9158	17.1848		19.1881	20.4488	18.1657	15.9868	14.4549	11.5315	18.9158	17.1848		+	0.0406044
Clo1313_1005	pyruvate phosphate dikinase PEP/pyruvate-binding protein	15	15.3696	15.7373	16.1631	16.1071	15.4591	13.8692		14.5545		15.3696	15.7373	16.1631	16.1071	15.4591	13.8692	11.5461	14.5545			0.201732
Clo1313_1007	Xanthine/uracil/vitamin C permease	9	16.0923	15.7491	18.7453	19.4272	20.1373	20.8607	21.3201	21.3106		16.0923	15.7491	18.7453	19.4272	20.1373	20.8607	21.3201	21.3106		+	0.000481757
Clo1313_1008	5-(carboxyamino)imidazole ribonucleotide mutase	9	18.9527	18.9818	19.6506	21.8066	21.8179	21.6856	21.9309	22.3898		18.9527	18.9818	19.6506	21.8066	21.8179	21.6856	21.9309	22.3898		+	0.0493267
Clo1313_1009	amidophosphoribosyltransferase (EC 2.4.2.14)	32	19.2339	17.0483	20.0647	19.6716	21.1058	20.6304	21.6918	20.9645		19.2339	17.0483	20.0647	19.6716	21.1058	20.6304	21.6918	20.9645			0.0645609
Clo1313_1010	phosphoribosylformylglycinamidine cyclo-ligase (EC 6.3.3.1)	17	14.9703	14.5474	17.446	17.1165	16.6549	19.6587	17.8394	17.9262		14.9703	14.5474	17.446	17.1165	16.6549	19.6587	17.8394	17.9262			0.10209
Clo1313_1011	formyltetrahydrofolate-dependent phosphoribosylglycinamide formyltransferase (EC 2.1.2.2)	11		13.7851	18.8062	18.4182	19.0856	19.0379	18.7643	18.8003		12.0293	13.7851	18.8062	18.4182	19.0856	19.0379	18.7643	18.8003		+	0.00165226
Clo1313_1012	phosphoribosylaminoimidazolecarboxamide formyltransferase/IMP cyclohydrolase	46	21.5445	21.0214	23.0394	23.334	23.153	23.442	24.2983	24.3531		21.5445	21.0214	23.0394	23.334	23.153	23.442	24.2983	24.3531		+	0.000952649
Clo1313_1013	phosphoribosylamine--glycine ligase (EC 6.3.4.13)	41	18.8042	18.1384	21.1553	21.5983	20.9528	21.7942	21.8088	21.7594		18.8042	18.1384	21.1553	21.5983	20.9528	21.7942	21.8088	21.7594		+	0.00385961
Clo1313_1015	GCN5-related N-acetyltransferase	9					15.3255	16.8408				12.5249	11.6352	11.3185	11.0781	15.3255	16.8408	11.616	12.1757		+	0.00569342
Clo1313_1017	metal dependent phosphohydrolase	9	18.2161	17.9212	17.1331	18.6494	17.9404	19.471	18.5433	18.4747		18.2161	17.9212	17.1331	18.6494	17.9404	19.471	18.5433	18.4747			0.711847
Clo1313_1020	leucyl-tRNA synthetase (EC 6.1.1.4)	59	21.0889	21.7421	20.9546	21.1892	20.4474	22.0536	21.342	20.7583		21.0889	21.7421	20.9546	21.1892	20.4474	22.0536	21.342	20.7583			0.932437
Clo1313_1021	PKD domain containing protein	154	11.9817			13.7009	15.3827	17.052	12.0156	11.444		11.9817	13.7096	12.1375	13.7009	15.3827	17.052	12.0156	11.444		+	0.0450339
Clo1313_1024	AMP-dependent synthetase and ligase	23	19.8147	19.5276	20.4382	19.8053		16.8671	19.0163	19.6303		19.8147	19.5276	20.4382	19.8053	11.4393	16.8671	19.0163	19.6303			0.102373
Clo1313_1025	peptidase S11 D-alanyl-D-alanine carboxypeptidase 1	15	17.443	16.8132	17.1099	17.2473			16.8601	16.2436		17.443	16.8132	17.1099	17.2473	9.67508	10.9547	16.8601	16.2436		+	0.000600015
Clo1313_1027	Lipoprotein LpqB, GerMN domain	6	15.0097	14.5043	17.9461	16.7143	16.6734	18.4916	17.3409	17.7257		15.0097	14.5043	17.9461	16.7143	16.6734	18.4916	17.3409	17.7257			0.0626289
Clo1313_1029	threonyl-tRNA synthetase (EC 6.1.1.3)	46	20.0458	19.8186	18.87	19.0765	18.1212	19.5184	19.4927	18.3796		20.0458	19.8186	18.87	19.0765	18.1212	19.5184	19.4927	18.3796			0.391358
Clo1313_1030	thymidylate synthase (EC 2.1.1.45)	17	18.8645	18.5628	18.0226	18.7343		18.5249	18.2163	17.8871		18.8645	18.5628	18.0226	18.7343	12.2071	18.5249	18.2163	17.8871			0.506053
Clo1313_1032	bacterial translation initiation factor 3 (bIF-3)	13	20.7115	19.1203	18.992	18.069	18.7298	17.6365	18.5585	15.3848		20.7115	19.1203	18.992	18.069	18.7298	17.6365	18.5585	15.3848			0.322017
Clo1313_1033	LSU ribosomal protein L35P	9	19.8699	19.6068	17.041	17.245	17.344	16.9904	17.278	15.3392		19.8699	19.6068	17.041	17.245	17.344	16.9904	17.278	15.3392		+	0.0306467
Clo1313_1034	LSU ribosomal protein L20P	12	20.5112	19.9546	18.6085	19.3943	18.3318		19.7786	15.4313		20.5112	19.9546	18.6085	19.3943	18.3318	11.892	19.7786	15.4313			0.400071
Clo1313_1036	glycosyltransferase 36	39	13.8247	14.7091	13.7512	15.3485				14.0571		13.8247	14.7091	13.7512	15.3485	12.0049	10.5108	11.2151	14.0571			0.176187
Clo1313_1040	ATP-dependent Clp protease ATP-binding subunit ClpA (EC 3.4.21.92)	23	16.8564	16.5977	16.6497	13.9643						16.8564	16.5977	16.6497	13.9643	12.4299	10.9568	10.7341	11.9793		+	0.0236646
Clo1313_1045	hypothetical protein	18	13.9504	17.56	15.2861	16.5969	15.3498	14.0247	14.8714	16.5		13.9504	17.56	15.2861	16.5969	15.3498	14.0247	14.8714	16.5			0.847618
Clo1313_1046	pyridoxal-phosphate dependent TrpB-like enzyme	30	23.8381	23.3156	24.3351	24.003	23.9654	23.6073	24.6371	23.178		23.8381	23.3156	24.3351	24.003	23.9654	23.6073	24.6371	23.178			0.779626
Clo1313_1052	putative serine protein kinase, PrkA	68	19.6024	20.0743	20.3934	20.8932	22.0279	20.9775	20.9668	19.398		19.6024	20.0743	20.3934	20.8932	22.0279	20.9775	20.9668	19.398			0.248501
Clo1313_1053	sporulation protein YhbH	18		18.9438	18.4999	18.33	18.8823	18.6046	18.2941	18.7629		10.8178	18.9438	18.4999	18.33	18.8823	18.6046	18.2941	18.7629			0.546144
Clo1313_1054	SpoVR family protein	25	19.8797	22.3893	22.1548	22.2608	21.1768	21.9983	21.0588	20.011		19.8797	22.3893	22.1548	22.2608	21.1768	21.9983	21.0588	20.011			0.481975
Clo1313_1056	purine nucleoside phosphorylase I, inosine and guanosine-specific	18	16.2192	17.0613	17.204	13.9722	18.3975	15.7894	17.1999	15.3558		16.2192	17.0613	17.204	13.9722	18.3975	15.7894	17.1999	15.3558			0.82304
Clo1313_1057	adenosylhomocysteinase (EC 3.3.1.1)	27	19.6788	20.519	18.7031	18.6123	19.2881	19.3991	18.6007	19.1038		19.6788	20.519	18.7031	18.6123	19.2881	19.3991	18.6007	19.1038		+	0.0482518
Clo1313_1058	amidohydrolase	15	15.869	16.7748	14.6443	12.971	15.8447	14.1682	16.1637	13.2255		15.869	16.7748	14.6443	12.971	15.8447	14.1682	16.1637	13.2255			0.43035
Clo1313_1065	Domain of unknown function DUF1910	13	13.3309	15.0209	13.7617	14.756	14.8748	16.3737	12.5956	10.9821		13.3309	15.0209	13.7617	14.756	14.8748	16.3737	12.5956	10.9821			0.0852254
Clo1313_1073	esterase/lipase	12	17.4195	16.0368	17.8076	16.1951	16.7446	15.2489	16.9509	16.774		17.4195	16.0368	17.8076	16.1951	16.7446	15.2489	16.9509	16.774			0.717615
Clo1313_1074	hypothetical protein	17	16.7402		16.943	16.2637	17.171		16.9355			16.7402	12.5915	16.943	16.2637	17.171	12.1549	16.9355	12.0963			0.864746
Clo1313_1076	ATPase associated with various cellular activities AAA_3	19	15.6453	17.5758	16.0757	17.3806	16.1306	17.9434	15.5193	16.0018		15.6453	17.5758	16.0757	17.3806	16.1306	17.9434	15.5193	16.0018			0.683684
Clo1313_1081	isochorismatase hydrolase	15	17.3147	18.4533	18.3616	18.7684	17.9281	18.2944	18.1006	18.0318		17.3147	18.4533	18.3616	18.7684	17.9281	18.2944	18.1006	18.0318			0.539661
Clo1313_1082	nicotinate phosphoribosyltransferase	23	18.043	17.8936	18.3459	18.1411	18.7428	17.6077	18.6464	17.6322		18.043	17.8936	18.3459	18.1411	18.7428	17.6077	18.6464	17.6322			0.960476
Clo1313_1087	iron-sulfur cluster-binding protein	16	17.4527	17.195	18.2709	17.0503	16.6598	17.1003	17.809	17.6306		17.4527	17.195	18.2709	17.0503	16.6598	17.1003	17.809	17.6306			0.380713
Clo1313_1089	peptidase S11 D-alanyl-D-alanine carboxypeptidase 1	17	18.8063	18.5307	18.7855	16.6804	18.3576		19.232	19.7282		18.8063	18.5307	18.7855	16.6804	18.3576	10.1406	19.232	19.7282			0.424138
Clo1313_1093	AMMECR1 domain protein	23		17.2183	17.0643	17.6139	18.3905	20.0472	17.268	18.8547		13.0684	17.2183	17.0643	17.6139	18.3905	20.0472	17.268	18.8547			0.247171
Clo1313_1095	protein of unknown function DUF147	5			18.3841	13.3048		15.588				11.5563	12.9214	18.3841	13.3048	12.2995	15.588	11.8199	11.7483			0.361425
Clo1313_1096	YbbR family protein	13	17.6501	17.4776	18.0691	17.8579	15.5019	17.2998	18.0904	16.9308		17.6501	17.4776	18.0691	17.8579	15.5019	17.2998	18.0904	16.9308			0.333267
Clo1313_1098	phosphoglucosamine mutase (EC 5.4.2.10)	16	19.0619	18.988	17.0718	18.8179	18.4683	19.2351	19.7135	19.5202		19.0619	18.988	17.0718	18.8179	18.4683	19.2351	19.7135	19.5202			0.245085
Clo1313_1099	glutamine--fructose-6-phosphate transaminase	23	19.115	19.4254	17.6064	18.4463	18.3457	18.9858	19.6199	17.8235		19.115	19.4254	17.6064	18.4463	18.3457	18.9858	19.6199	17.8235			0.502398
Clo1313_1106	type II secretion system protein E	72	20.8017	21.1349	20.5273	19.4999	19.8331	15.545	20.4115	18.2021		20.8017	21.1349	20.5273	19.4999	19.8331	15.545	20.4115	18.2021			0.402284
Clo1313_1107	twitching motility protein	23	20.9178	20.4333	20.6659	20.2387	21.3181	19.6793	21.863	20.089		20.9178	20.4333	20.6659	20.2387	21.3181	19.6793	21.863	20.089			0.928304
Clo1313_1108	Type II secretion system F domain	21	18.6889	19.5535	19.3959	19.7499	20.7717	20.0601	19.794	18.3029		18.6889	19.5535	19.3959	19.7499	20.7717	20.0601	19.794	18.3029			0.294223
Clo1313_1109	hypothetical protein	11	21.8972	22.7952	21.8127	22.25	23.2445	22.7244	23.4496	22.0129		21.8972	22.7952	21.8127	22.25	23.2445	22.7244	23.4496	22.0129			0.535684
Clo1313_1110	hypothetical protein	10	18.4776	18.4724	18.6998	16.6788	20.0484	18.6235	19.0424	17.8786		18.4776	18.4724	18.6998	16.6788	20.0484	18.6235	19.0424	17.8786			0.489554
Clo1313_1111	Fimbrial assembly family protein	11	19.6239	20.0848	20.1904	20.4568	20.8366	20.2716	20.8693	19.402		19.6239	20.0848	20.1904	20.4568	20.8366	20.2716	20.8693	19.402			0.697026
Clo1313_1112	hypothetical protein	19	18.4291	19.9069	19.0122	19.6606	20.5924	17.8158	17.9795	17.567		18.4291	19.9069	19.0122	19.6606	20.5924	17.8158	17.9795	17.567			0.544881
Clo1313_1114	hypothetical protein	41	16.2265	15.9601	16.3847	16.3482	17.7338	16.2357	15.6361	14.4795		16.2265	15.9601	16.3847	16.3482	17.7338	16.2357	15.6361	14.4795			0.170522
Clo1313_1115	hypothetical protein	46	19.5455	19.8856	19.6504	19.7995	20.9876	19.3192	19.9214	18.8249		19.5455	19.8856	19.6504	19.7995	20.9876	19.3192	19.9214	18.8249			0.76364
Clo1313_1118	DNA translocase FtsK	15	16.1178	15.1887	14.7137	13.7924	15.1668	15.1397	14.147			16.1178	15.1887	14.7137	13.7924	15.1668	15.1397	14.147	10.3115			0.227796
Clo1313_1119	Radical SAM domain protein	21	14.1919		15.6353	12.3898	17.2038	14.7712	15.3409			14.1919	11.1179	15.6353	12.3898	17.2038	14.7712	15.3409	12.4033			0.522226
Clo1313_1120	Methylenetetrahydrofolate dehydrogenase (NADP(+))	23	21.6003	20.9271	20.5972	20.6492	20.9201	22.2134	20.8958	20.5989		21.6003	20.9271	20.5972	20.6492	20.9201	22.2134	20.8958	20.5989			0.362676
Clo1313_1122	metal dependent phosphohydrolase	46	20.6921	20.6899	21.5007	20.7579	19.3817	20.3217	20.5266	19.8198		20.6921	20.6899	21.5007	20.7579	19.3817	20.3217	20.5266	19.8198			0.186802
Clo1313_1123	metallophosphoesterase	8			14.1754	11.6355	12.6836	16.8058	14.5939	14.243		12.085	11.7198	14.1754	11.6355	12.6836	16.8058	14.5939	14.243			0.418787
Clo1313_1124	Stage V sporulation protein S	4	21.9033	22.7822	21.8577	22.6065	21.8722	22.2008	22.3348	22.5594		21.9033	22.7822	21.8577	22.6065	21.8722	22.2008	22.3348	22.5594			0.804969
Clo1313_1135	hypothetical protein	10	17.0876	17.8855	18.997	18.9925	19.9418	18.3266	18.5967	17.5164		17.0876	17.8855	18.997	18.9925	19.9418	18.3266	18.5967	17.5164			0.227207
Clo1313_1138	protein of unknown function DUF881	13	15.7583	17.2665	16.0606	16.7261	14.8861	16.0858	16.0968	17.5198		15.7583	17.2665	16.0606	16.7261	14.8861	16.0858	16.0968	17.5198			0.538171
Clo1313_1142	PhoH family protein	13	17.4007	17.0477	18.0876	16.9121	18.7053		16.9926	15.8224		17.4007	17.0477	18.0876	16.9121	18.7053	11.9821	16.9926	15.8224			0.816998
Clo1313_1143	7TM receptor with intracellular metal dependent phosphohydrolase	18	17.6386	16.2293	18.0781	16.1957	17.4028	16.0775	17.451	17.6801		17.6386	16.2293	18.0781	16.1957	17.4028	16.0775	17.451	17.6801			0.843011
Clo1313_1146	GTP-binding protein Era	9	17.5104	14.3321	16.3774	15.7126		15.8498	14.6283	16.8963		17.5104	14.3321	16.3774	15.7126	12.2797	15.8498	14.6283	16.8963			0.70998
Clo1313_1149	type IV pilus assembly PilZ	5			13.3902	13.8561				13.2967		10.5766	10.7283	13.3902	13.8561	11.7235	13.0531	11.1225	13.2967			0.12743
Clo1313_1150	Cysteine desulfurase	14	16.2466	14.9841	17.2444	16.1864	17.2337	16.872	17.6359	17.9448		16.2466	14.9841	17.2444	16.1864	17.2337	16.872	17.6359	17.9448			0.091501
Clo1313_1151	thiamine biosynthesis/tRNA modification protein ThiI	22	14.5595	14.8314	17.6919	16.734	15.7168	14.6361	16.7231	17.3012		14.5595	14.8314	17.6919	16.734	15.7168	14.6361	16.7231	17.3012		+	0.0231881
Clo1313_1153	Protein of unknown function DUF2225	11	18.9317	19.0199	16.57				18.0058			18.9317	19.0199	16.57	11.27	12.0399	12.178	18.0058	12.9193			0.196814
Clo1313_1154	AIR synthase related protein domain protein	17	16.0396	14.7051	15.4855	13.413	16.4305	15.3554	15.4271	14.013		16.0396	14.7051	15.4855	13.413	16.4305	15.3554	15.4271	14.013			0.58379
Clo1313_1155	serine hydroxymethyltransferase (EC 2.1.2.1)	27	23.1225	21.7874	23.0837	21.8626	20.5444	20.9527	23.0304	21.5288		23.1225	21.7874	23.0837	21.8626	20.5444	20.9527	23.0304	21.5288			0.264528
Clo1313_1157	transglutaminase domain-containing protein	10		16.8449	14.6198	15.0409			14.9344			10.9553	16.8449	14.6198	15.0409	13.3322	12.4098	14.9344	10.8157			0.845199
Clo1313_1159	ATPase associated with various cellular activities AAA_3	18	17.0626	18.81	18.1746	18.3011	16.8913	17.4605	18.3214	18.1275		17.0626	18.81	18.1746	18.3011	16.8913	17.4605	18.3214	18.1275			0.428754
Clo1313_1160	L-lactate dehydrogenase (EC 1.1.1.27)	14	19.6069	17.336								19.6069	17.336	11.9719	11.2905	12.0132	11.8831	11.9719	11.8647		+	0.00309417
Clo1313_1161	competence/damage-inducible protein cinA	26	15.1886	17.3519	17.0662	17.9788	15.6635	17.7855	17.8281	17.179		15.1886	17.3519	17.0662	17.9788	15.6635	17.7855	17.8281	17.179			0.658661
Clo1313_1163	recA protein	31	20.2916	20.0086	21.6401	20.7021	21.52	21.8325	21.2011	21.3673		20.2916	20.0086	21.6401	20.7021	21.52	21.8325	21.2011	21.3673			0.0545773
Clo1313_1165	Rhomboid family protein	7	17.2007	18.3439	16.034	17.8031			15.3557			17.2007	18.3439	16.034	17.8031	12.0365	10.951	15.3557	12.5052		+	0.0265973
Clo1313_1172	UDP-N-acetylmuramoylalanine--D-glutamate ligase (EC 6.3.2.9)	22	18.0464	17.1848	16.8524	16.9239	16.8878	17.639	17.914	18.1533		18.0464	17.1848	16.8524	16.9239	16.8878	17.639	17.914	18.1533			0.172693
Clo1313_1174	SSU ribosomal protein S20P	9	21.4049	21.435	20.3332	19.935		18.0425	20.1752	20.1103		21.4049	21.435	20.3332	19.935	11.8356	18.0425	20.1752	20.1103			0.132706
Clo1313_1178	DNA ligase, NAD-dependent	45	18.9845	17.8866	19.2109	19.4323	16.8572	19.3603	19.2064	16.045		18.9845	17.8866	19.2109	19.4323	16.8572	19.3603	19.2064	16.045			0.721386
Clo1313_1180	hypothetical protein	8			14.0506		15.4204	16.9062	15.6656	17.1802		10.763	11.6833	14.0506	12.3493	15.4204	16.9062	15.6656	17.1802		+	0.0179412
Clo1313_1183	aspartyl/glutamyl-tRNA(Asn/Gln) amidotransferase subunit B (EC 6.3.5.-)	16	13.2512	13.4468	13.2012	14.6249		15.794	15.449	15.4593		13.2512	13.4468	13.2012	14.6249	12.0845	15.794	15.449	15.4593			0.545493
Clo1313_1185	phosphate acetyltransferase	25	20.3308	20.9325				14.0514				20.3308	20.9325	10.8329	12.8224	12.0232	14.0514	12.2989	13.9968		+	0.00556822
Clo1313_1186	acetate kinase (EC 2.7.2.1)	39	21.2901	20.0557				13.7916				21.2901	20.0557	11.1627	11.4161	10.5711	13.7916	12.9155	12.3318		+	0.00483893
Clo1313_1188	ribosomal protein L32	3	20.1995	19.6373								20.1995	19.6373	11.1215	12.1769	10.369	11.0847	11.5441	10.5209		+	0.000299184
Clo1313_1190	ribosome-associated GTPase EngA	15	17.6544	16.704	14.5313	15.3528	16.1848	17.3052	15.9103	16.5221		17.6544	16.704	14.5313	15.3528	16.1848	17.3052	15.9103	16.5221			0.0848897
Clo1313_1192	glycerol 3-phosphate dehydrogenase (NAD(P)+) (EC 1.1.1.94)	17	19.1906	18.8707	17.9974	16.5575	17.8999	17.7779	18.3966	17.9101		19.1906	18.8707	17.9974	16.5575	17.8999	17.7779	18.3966	17.9101			0.126803
Clo1313_1193	stage IV sporulation protein A	9	13.4785				13.2737	10.1132				13.4785	11.9479	12.3026	10.9704	13.2737	10.1132	11.5218	12.5674			0.852773
Clo1313_1194	extracellular solute-binding protein family 1	53	27.1677	26.0134	25.7617	24.972	26.4025	25.4694	26.706	26.6538		27.1677	26.0134	25.7617	24.972	26.4025	25.4694	26.706	26.6538			0.238245
Clo1313_1195	binding-protein-dependent transport systems inner membrane component	7	23.0845	19.3878	20.5694	19.6097	19.1364	18.9601	22.9427	20.9393		23.0845	19.3878	20.5694	19.6097	19.1364	18.9601	22.9427	20.9393			0.366635
Clo1313_1196	binding-protein-dependent transport systems inner membrane component	9	19.0216	16.47	16.573	16.1665	18.0613	15.9331	19.2288	15.5221		19.0216	16.47	16.573	16.1665	18.0613	15.9331	19.2288	15.5221			0.877244
Clo1313_1201	MutS2 family protein	35	15.0715	13.1705	14.0241	13.6076	15.6161	15.2267	14.5279	15.0115		15.0715	13.1705	14.0241	13.6076	15.6161	15.2267	14.5279	15.0115			0.262832
Clo1313_1205	peptidase U32	16	17.1964	16.501	17.1162	15.5485	16.7984	17.4026	16.5607	15.5514		17.1964	16.501	17.1162	15.5485	16.7984	17.4026	16.5607	15.5514			0.539744
Clo1313_1207	aminodeoxychorismate lyase	16	18.501	17.8369	18.6007	18.6625	17.7891	20.0359	17.7258	19.7605		18.501	17.8369	18.6007	18.6625	17.7891	20.0359	17.7258	19.7605			0.912454
Clo1313_1208	GTP-binding protein TypA	14	15.8622	17.0158	15.0013	13.863	14.2807	18.2307	17.0435	14.7945		15.8622	17.0158	15.0013	13.863	14.2807	18.2307	17.0435	14.7945			0.663122
Clo1313_1209	ribosomal protein S2	27	23.0163	22.3097	21.9894	21.8736	21.574	20.4959	22.5215	21.1476		23.0163	22.3097	21.9894	21.8736	21.574	20.4959	22.5215	21.1476			0.257411
Clo1313_1210	translation elongation factor Ts	34	24.2426	23.8586	23.4658	23.5	23.0213	24.0005	23.7422	23.5464		24.2426	23.8586	23.4658	23.5	23.0213	24.0005	23.7422	23.5464			0.49376
Clo1313_1211	uridylate kinase (EC 2.7.4.22)	14	16.6904	15.7016				14.8468		13.2187		16.6904	15.7016	11.1833	12.0558	11.928	14.8468	11.2319	13.2187			0.0861339
Clo1313_1212	ribosome recycling factor	22	22.6674	21.6397	22.542	20.9586	22.1178	21.8796	21.4015	21.2623		22.6674	21.6397	22.542	20.9586	22.1178	21.8796	21.4015	21.2623			0.666392
Clo1313_1214	undecaprenyl diphosphate synthase	15	16.6866	14.8932	16.1675	13.7504	15.3163	16.1451	15.6724	16.5338		16.6866	14.8932	16.1675	13.7504	15.3163	16.1451	15.6724	16.5338			0.785878
Clo1313_1216	1-deoxy-D-xylulose 5-phosphate reductoisomerase (EC 1.1.1.267)	14	13.6597	11.3968	13.3512	8.71123	12.3935		12.1757	10.8844		13.6597	11.3968	13.3512	8.71123	12.3935	11.1442	12.1757	10.8844			0.886002
Clo1313_1217	membrane-associated zinc metalloprotease	7	12.9143	12.0823								12.9143	12.0823	11.4852	11.4371	10.6214	12.3409	11.7311	12.2453			0.482612
Clo1313_1218	4-hydroxy-3-methylbut-2-en-1-yl diphosphate synthase (EC 1.17.4.3)	19	14.3563	14.3224	14.196	14.23		16.1421	15.359	17.0753		14.3563	14.3224	14.196	14.23	12.1169	16.1421	15.359	17.0753			0.541307
Clo1313_1221	protein of unknown function DUF150	9	18.7494	17.2572	17.8332	14.6204	16.2308	15.96	18.2453	17.2404		18.7494	17.2572	17.8332	14.6204	16.2308	15.96	18.2453	17.2404			0.427162
Clo1313_1222	NusA antitermination factor	38	20.2797	20.1456	19.2604	19.6879	17.968	18.6302	19.5835	18.0649		20.2797	20.1456	19.2604	19.6879	17.968	18.6302	19.5835	18.0649			0.118481
Clo1313_1225	translation initiation factor IF-2	67	20.3732	19.615	20.0885	18.4709	19.3192	18.1579	19.8681	19.0531		20.3732	19.615	20.0885	18.4709	19.3192	18.1579	19.8681	19.0531			0.544908
Clo1313_1226	ribosome-binding factor A	14	18.5795	19.3886	17.5799	19.13	18.0767	19.1037	18.1573	18.9182		18.5795	19.3886	17.5799	19.13	18.0767	19.1037	18.1573	18.9182			0.865221
Clo1313_1227	phosphoesterase RecJ domain protein	9	17.3157	17.4252	15.6368	14.9987		15.0221	15.9808	17.5611		17.3157	17.4252	15.6368	14.9987	9.61583	15.0221	15.9808	17.5611			0.19561
Clo1313_1229	riboflavin biosynthesis protein RibF	8	14.7704	13.6401			14.5641					14.7704	13.6401	11.6556	10.9224	14.5641	10.5336	12.23	11.7475			0.37662
Clo1313_1231	peptidase M16 domain protein	13	16.0151	16.0229	14.9484	15.7437		13.0087		18.0597		16.0151	16.0229	14.9484	15.7437	12.6918	13.0087	11.5461	18.0597			0.604379
Clo1313_1232	peptidase M16 domain protein	14	14.8386	15.132	13.1516			13.8202	16.2241			14.8386	15.132	13.1516	11.6534	12.9811	13.8202	16.2241	12.7888			0.355329
Clo1313_1236	MraZ protein	11			17.6157	18.6494	16.3152	18.3456	18.7382	18.6516		12.2502	11.3462	17.6157	18.6494	16.3152	18.3456	18.7382	18.6516		+	0.00413169
Clo1313_1237	S-adenosyl-methyltransferase MraW	17	15.6275	15.0574	16.1192	16.0488	14.5568	15.7716	17.2443	16.9301		15.6275	15.0574	16.1192	16.0488	14.5568	15.7716	17.2443	16.9301			0.0521032
Clo1313_1239	penicillin-binding protein transpeptidase	12	14.0103	17.754	14.5844	14.3626		14.7589		13.7077		14.0103	17.754	14.5844	14.3626	11.1599	14.7589	12.0882	13.7077			0.44967
Clo1313_1240	UDP-N-acetylmuramoylalanyl-D-glutamate--2,6-diaminopimelate ligase (EC 6.3.2.13)	26	16.6215	16.6564	15.908	15.786	14.312	16.2731	16.2243	16.4863		16.6215	16.6564	15.908	15.786	14.312	16.2731	16.2243	16.4863			0.358294
Clo1313_1241	UDP-N-acetylmuramoyl-tripeptide--D-alanyl-D-alanine ligase (EC 6.3.2.10)	21	16.7354	17.928	16.5199	16.8767		18.1226	15.1667	16.1412		16.7354	17.928	16.5199	16.8767	9.63987	18.1226	15.1667	16.1412			0.70861
Clo1313_1251	ATP:corrinoid adenosyltransferase BtuR/CobO/CobP	7						13.6786	14.1712	12.8029		12.0473	10.196	12.2132	12.5629	11.197	13.6786	14.1712	12.8029			0.391125
Clo1313_1253	dihydrodipicolinate reductase (EC 1.3.1.26)	12	20.5371	19.3776	19.4746	20.1167	21.4994	19.5719	20.3947	19.3859		20.5371	19.3776	19.4746	20.1167	21.4994	19.5719	20.3947	19.3859			0.841432
Clo1313_1254	dihydrodipicolinate synthase (EC 4.2.1.52)	24	20.5508	20.3568	20.1156	19.3785	22.0612	20.1617	20.4456	19.643		20.5508	20.3568	20.1156	19.3785	22.0612	20.1617	20.4456	19.643			0.429456
Clo1313_1255	aspartate semialdehyde dehydrogenase (EC 1.2.1.11)	23	21.0749	20.7359	20.8816	20.7404	22.2519	19.5238	20.4438	20.4231		21.0749	20.7359	20.8816	20.7404	22.2519	19.5238	20.4438	20.4231			0.953895
Clo1313_1256	SpoIID/LytB domain protein	10	15.3706	12.0259	13.3472							15.3706	12.0259	13.3472	12.1432	12.1002	11.641	13.3798	12.8192			0.594727
Clo1313_1258	tRNA-guanine transglycosylase (EC 2.4.2.29)	10	18.1907		19.559	10.1152	18.2954		17.806	14.7552		18.1907	9.99746	19.559	10.1152	18.2954	10.9462	17.806	14.7552			0.976316
Clo1313_1259	protein translocase subunit yajC	3	18.9272	19.1532	15.1877	18.1975		18.6168	19.3152			18.9272	19.1532	15.1877	18.1975	12.2864	18.6168	19.3152	10.6083			0.746275
Clo1313_1262	phosphoribosyltransferase	12	17.9396	17.4882	17.1242	17.8122	19.9628	18.372	18.4214	19.1289		17.9396	17.4882	17.1242	17.8122	19.9628	18.372	18.4214	19.1289			0.165594
Clo1313_1264	aspartate carbamoyltransferase (EC 2.1.3.2)	23	16.9552	18.2299	17.7291	18.2218	18.3501	18.9341	19.2808	19.8975		16.9552	18.2299	17.7291	18.2218	18.3501	18.9341	19.2808	19.8975			0.0837743
Clo1313_1265	dihydroorotase (EC 3.5.2.3)	18	18.5403	17.439	19.476	17.5824	20.3677	19.0973	19.166	19.4152		18.5403	17.439	19.476	17.5824	20.3677	19.0973	19.166	19.4152			0.344646
Clo1313_1266	orotidine-5'-phosphate decarboxylase (EC 4.1.1.23)	25	19.2135	19.5166	20.5831	17.9402	20.5109	19.8034	19.2145	20.371		19.2135	19.5166	20.5831	17.9402	20.5109	19.8034	19.2145	20.371			0.821767
Clo1313_1267	carbamoyl-phosphate synthase, small subunit	23	18.8988	18.2086	19.6337	18.4507	20.2661	18.7872	19.609	18.761		18.8988	18.2086	19.6337	18.4507	20.2661	18.7872	19.609	18.761			0.677136
Clo1313_1268	carbamoyl-phosphate synthase large subunit	90	20.3467	19.8047	20.8297	20.0225	21.8214	20.4838	20.9321	21.1792		20.3467	19.8047	20.8297	20.0225	21.8214	20.4838	20.9321	21.1792			0.339741
Clo1313_1269	Dihydroorotate dehydrogenase, electron transfer subunit, iron-sulfur cluster binding domain	11	16.7132	17.7431	17.8893	17.4426	18.4635	18.1507	17.5086	18.1483		16.7132	17.7431	17.8893	17.4426	18.4635	18.1507	17.5086	18.1483			0.287023
Clo1313_1270	dihydroorotate dehydrogenase family protein	13	18.0068	18.0842	19.0316	17.3783	19.5035	18.6891	18.3765	19.1458		18.0068	18.0842	19.0316	17.3783	19.5035	18.6891	18.3765	19.1458			0.495154
Clo1313_1271	Phosphoglycerate mutase	12	19.1307	18.6997	15.8658	17.494	17.9307	16.5394	18.3301	17.2595		19.1307	18.6997	15.8658	17.494	17.9307	16.5394	18.3301	17.2595			0.201983
Clo1313_1275	SSU ribosomal protein S12P methylthiotransferase (EC 2.-.-.-)	29	17.833	16.1999	17.7088	18.2021	16.4034	18.2922	18.4856	18.5468		17.833	16.1999	17.7088	18.2021	16.4034	18.2922	18.4856	18.5468			0.449962
Clo1313_1279	regulatory protein DeoR	13	17.9448	16.8223	18.0317	19.9504	17.1465	16.1575	17.9195	18.2249		17.9448	16.8223	18.0317	19.9504	17.1465	16.1575	17.9195	18.2249			0.185402
Clo1313_1280	phosphate:acyl-[acyl carrier protein] acyltransferase	14	18.6837	17.586	18.4048	18.8845	18.7764	19.0594	18.9438	18.7809		18.6837	17.586	18.4048	18.8845	18.7764	19.0594	18.9438	18.7809			0.384364
Clo1313_1281	3-oxoacyl-[acyl-carrier-protein] synthase III (EC 2.3.1.41)	27	21.4564	20.7739	22.0791	22.3705	21.7762	20.9722	21.8934	21.8096		21.4564	20.7739	22.0791	22.3705	21.7762	20.9722	21.8934	21.8096			0.142587
Clo1313_1282	[Acyl-carrier-protein] S-malonyltransferase (EC 2.3.1.39)	28	20.7434	19.851	21.3154	22.0855	20.2115	20.4234	20.4381	20.6903		20.7434	19.851	21.3154	22.0855	20.2115	20.4234	20.4381	20.6903			0.083927
Clo1313_1283	3-oxoacyl-[acyl-carrier-protein] reductase (EC 1.1.1.100)	22	20.8351	21.5085	22.1761	23.4532	20.7393	21.9829	21.8227	21.0652		20.8351	21.5085	22.1761	23.4532	20.7393	21.9829	21.8227	21.0652			0.235616
Clo1313_1285	3-oxoacyl-[acyl-carrier-protein] synthase II (EC 2.3.1.41)	27	21.2627	20.3297	21.2869	20.9942	20.8596	20.8209	21.0259	20.7143		21.2627	20.3297	21.2869	20.9942	20.8596	20.8209	21.0259	20.7143			0.781858
Clo1313_1286	RNAse III (EC 3.1.26.3)	12	16.4253		16.295	17.0485	14.0364			15.551		16.4253	12.6878	16.295	17.0485	14.0364	11.3497	11.0913	15.551			0.421672
Clo1313_1288	Stage V sporulation protein S	7	20.0808	18.7473	19.9113	19.8161	19.7462	19.1298	17.3917	18.8231		20.0808	18.7473	19.9113	19.8161	19.7462	19.1298	17.3917	18.8231			0.230994
Clo1313_1290	condensin subunit Smc	28	13.2572	12.5192	12.2567	12.3524			13.7362			13.2572	12.5192	12.2567	12.3524	12.9322	11.5694	13.7362	13.1843			0.27049
Clo1313_1291	signal recognition particle-docking protein FtsY	17	15.6608	16.7589	17.7339	17.2118	16.4437	17.4743	18.1449	17.5703		15.6608	16.7589	17.7339	17.2118	16.4437	17.4743	18.1449	17.5703			0.170434
Clo1313_1295	diaminopimelate dehydrogenase (EC 1.4.1.16)	24	19.5096	19.0617	20.4159	20.6442	20.7006	21.589	20.3052	20.9769		19.5096	19.0617	20.4159	20.6442	20.7006	21.589	20.3052	20.9769		+	0.0488887
Clo1313_1301	glutaminyl-tRNA synthetase (EC 6.1.1.18)	42	20.3881	19.7361	20.6639	19.9597	19.1858	19.2801	19.7097	18.7663		20.3881	19.7361	20.6639	19.9597	19.1858	19.2801	19.7097	18.7663			0.177049
Clo1313_1302	hypothetical protein	21	19.1726	18.3836	19.5648	18.9728	18.2341	17.0064	18.9141	18.436		19.1726	18.3836	19.5648	18.9728	18.2341	17.0064	18.9141	18.436			0.169417
Clo1313_1304	Protein of unknown function DUF2339, transmembrane	23	19.5427	17.6697	18.9332	18.0169	18.0828	17.9055	18.8619	17.3635		19.5427	17.6697	18.9332	18.0169	18.0828	17.9055	18.8619	17.3635			0.888987
Clo1313_1305	glycoside hydrolase family 10	34	17.4669	16.0155	17.4759	18.2323	19.7508	18.6402	16.6675	19.5474		17.4669	16.0155	17.4759	18.2323	19.7508	18.6402	16.6675	19.5474			0.382086
Clo1313_1312	Radical SAM domain protein	28	17.9632	16.9306	17.5339	16.7217	16.591	18.2835	17.5161	17.3226		17.9632	16.9306	17.5339	16.7217	16.591	18.2835	17.5161	17.3226			0.96649
Clo1313_1313	metal dependent phosphohydrolase	13	17.546	17.4247		17.4114	16.3343	19.5996	17.6901	18.0539		17.546	17.4247	12.6355	17.4114	16.3343	19.5996	17.6901	18.0539			0.507071
Clo1313_1314	protein-export membrane protein SecD	25	21.614	22.1304	20.6164	20.6139	20.2869	21.1467	20.8802	20.9539		21.614	22.1304	20.6164	20.6139	20.2869	21.1467	20.8802	20.9539			0.071871
Clo1313_1315	protein translocase subunit secF	10	21.6614	21.8824	21.0213	19.7509	19.3896	21.0806	20.9824	19.9192		21.6614	21.8824	21.0213	19.7509	19.3896	21.0806	20.9824	19.9192			0.356241
Clo1313_1316	ketopantoate hydroxymethyltransferase (EC 2.1.2.11)	21	16.3826	17.5931	19.6354	18.9672	19.7823	16.9593	20.1454	20.8098		16.3826	17.5931	19.6354	18.9672	19.7823	16.9593	20.1454	20.8098			0.135298
Clo1313_1317	pantoate/beta-alanine ligase	21	17.3769	17.9437	20.246	20.2166	21.0115	20.2425	21.4625	20.9917		17.3769	17.9437	20.246	20.2166	21.0115	20.2425	21.4625	20.9917		+	0.00251875
Clo1313_1318	L-aspartate 1-decarboxylase (EC 4.1.1.11)	7	15.3273	12.8952	16.9286	17.6254	18.3601	17.0071	18.6653	17.8105		15.3273	12.8952	16.9286	17.6254	18.3601	17.0071	18.6653	17.8105			0.056141
Clo1313_1320	metal dependent phosphohydrolase	13	13.2436	12.8684	11.9137			14.648		14.2016		13.2436	12.8684	11.9137	10.7799	12.3614	14.648	12.5165	14.2016			0.307972
Clo1313_1323	DNA primase	11					13.1781		13.0627	12.2965		11.7282	12.9773	12.0966	11.6926	13.1781	11.7067	13.0627	12.2965			0.769593
Clo1313_1324	RNA polymerase, sigma 38 subunit, RpoS	19	20.0306	17.805	20.4721	19.1731	19.4961	19.35	20.0971	20.8651		20.0306	17.805	20.4721	19.1731	19.4961	19.35	20.0971	20.8651			0.492371
Clo1313_1328	protein of unknown function DUF34	18	19.5461	16.8073	20.4456	17.014	17.7806	17.5164	19.0035	17.824		19.5461	16.8073	20.4456	17.014	17.7806	17.5164	19.0035	17.824			0.917656
Clo1313_1329	response regulator receiver protein	9	18.8606	20.1952		13.1749	13.2069		16.8601	14.5904		18.8606	20.1952	10.8781	13.1749	13.2069	11.1008	16.8601	14.5904		+	0.0177415
Clo1313_1330	RNA polymerase, sigma-24 subunit, RpoE	6			15.2594	15.1091						10.633	11.2185	15.2594	15.1091	11.4024	12.4363	11.5476	11.0096		+	0.00246047
Clo1313_1334	DNA polymerase I (EC 2.7.7.7)	39	17.7773	16.6925	17.0254	17.0682	18.0489	17.2833	17.0811	17.7608		17.7773	16.6925	17.0254	17.0682	18.0489	17.2833	17.0811	17.7608			0.700676
Clo1313_1340	3-deoxy-D-arabinoheptulosonate-7-phosphate synthase (EC 2.5.1.54)	18	17.4581	16.9268	12.7027	13.4885	17.3516		15.6955	14.7007		17.4581	16.9268	12.7027	13.4885	17.3516	11.7615	15.6955	14.7007			0.366335
Clo1313_1341	CheW protein	20	21.2291	20.667	22.4842	22.0138	18.2966	17.1567	23.3642	22.2079		21.2291	20.667	22.4842	22.0138	18.2966	17.1567	23.3642	22.2079		+	0.00440142
Clo1313_1342	GTP-binding protein YchF	24	19.8485	19.0993	20.5428	19.5376	17.3897	19.2172	19.1999	19.4382		19.8485	19.0993	20.5428	19.5376	17.3897	19.2172	19.1999	19.4382			0.306298
Clo1313_1344	anthranilate synthase component I	34	18.5743	19.8103	19.9677	20.1539	18.9129	19.1345	20.5191	19.6773		18.5743	19.8103	19.9677	20.1539	18.9129	19.1345	20.5191	19.6773			0.230114
Clo1313_1345	anthranilate synthase, component II (EC 4.1.3.27)	10	13.7829	14.8062	14.8282	15.8946	14.781	14.7955	15.0171	15.8498		13.7829	14.8062	14.8282	15.8946	14.781	14.7955	15.0171	15.8498			0.324711
Clo1313_1346	anthranilate phosphoribosyltransferase (EC 2.4.2.18)	14	19.1478	19.5883	22.1299	21.736	22.2029	19.7731	21.6202	20.2653		19.1478	19.5883	22.1299	21.736	22.2029	19.7731	21.6202	20.2653			0.226502
Clo1313_1347	indole-3-glycerol phosphate synthase (EC 4.1.1.48)	15	18.9839	18.53	19.9236	18.531	18.8431	17.826	19.4388	18.0252		18.9839	18.53	19.9236	18.531	18.8431	17.826	19.4388	18.0252			0.753844
Clo1313_1348	phosphoribosylanthranilate isomerase (EC 5.3.1.24)	6	17.5582		19.1607		17.6863		18.8625	18.2741		17.5582	10.7877	19.1607	12.0739	17.6863	12.8437	18.8625	18.2741			0.718781
Clo1313_1349	NADPH-dependent FMN reductase	16	20.7539	19.3777	21.6154	21.8558	20.4486	21.3756	21.8286	22.0186		20.7539	19.3777	21.6154	21.8558	20.4486	21.3756	21.8286	22.0186			0.104254
Clo1313_1351	hypothetical protein	7		16.2396	17.9901	18.0478		18.0878	16.0156	17.7034		11.4612	16.2396	17.9901	18.0478	10.2432	18.0878	16.0156	17.7034			0.570472
Clo1313_1352	type IV pilus assembly PilZ	17	20.4107	20.1919	20.6311	20.1383	19.4498	19.9062	18.2322	19.48		20.4107	20.1919	20.6311	20.1383	19.4498	19.9062	18.2322	19.48			0.111305
Clo1313_1353	4Fe-4S ferredoxin iron-sulfur binding domain protein	8	19.8236	20.1262	19.5108	19.3205	18.3048	19.2365	19.8951	17.1446		19.8236	20.1262	19.5108	19.3205	18.3048	19.2365	19.8951	17.1446			0.553457
Clo1313_1354	pyruvate flavodoxin/ferredoxin oxidoreductase domain protein	24	20.9178	21.4682	22.0315	21.8722	19.9044	21.8003	21.8155	21.7733		20.9178	21.4682	22.0315	21.8722	19.9044	21.8003	21.8155	21.7733			0.45301
Clo1313_1355	thiamine pyrophosphate TPP-binding domain-containing protein	11	19.4918	17.1467	19.2085	17.7294	16.2026	18.8284	19.1055	18.077		19.4918	17.1467	19.2085	17.7294	16.2026	18.8284	19.1055	18.077			0.864212
Clo1313_1356	2-oxoglutarate ferredoxin oxidoreductase, gamma subunit (EC 1.2.7.3)	15	21.5306	16.5389	22.0136	17.6149	19.868	18.6459	21.2886	18.4411		21.5306	16.5389	22.0136	17.6149	19.868	18.6459	21.2886	18.4411			0.983092
Clo1313_1357	glutamine synthetase catalytic region	41	18.9818	18.9075	20.7251	20.9568	18.3454	19.1072	19.968	19.7784		18.9818	18.9075	20.7251	20.9568	18.3454	19.1072	19.968	19.7784		+	0.00592099
Clo1313_1361	hypothetical protein	5	18.5862	19.4775	18.0941	18.8995	18.0988	18.5805	18.633	18.931		18.5862	19.4775	18.0941	18.8995	18.0988	18.5805	18.633	18.931			0.53305
Clo1313_1362	band 7 protein	29	21.9156	22.208	22.1563	22.5049	22.3601	22.707	22.4571	23.0683		21.9156	22.208	22.1563	22.5049	22.3601	22.707	22.4571	23.0683			0.2524
Clo1313_1363	protein of unknown function DUF107	4		16.4162		17.7457		17.3814	17.6116	19.0637		11.0093	16.4162	11.4627	17.7457	11.7323	17.3814	17.6116	19.0637			0.616558
Clo1313_1364	branched-chain amino acid aminotransferase	23	22.9399	22.5312	22.2546	21.454	21.3309	20.8892	22.0266	21.5059		22.9399	22.5312	22.2546	21.454	21.3309	20.8892	22.0266	21.5059			0.0647485
Clo1313_1365	HAD superfamily (subfamily IIIA) phosphatase, TIGR01668	5		15.3427	14.5053	14.4483		12.3292				10.5723	15.3427	14.5053	14.4483	11.6609	12.3292	12.7893	11.3594			0.537667
Clo1313_1366	shikimate dehydrogenase (EC 1.1.1.25)	13	13.9484	14.8094	13.7389	14.8653	14.5085	15.2284		17.2146		13.9484	14.8094	13.7389	14.8653	14.5085	15.2284	11.5905	17.2146			0.991557
Clo1313_1367	type II secretion system protein E (GspE)	6	14.5764	14.1219								14.5764	14.1219	12.0056	12.0742	12.3668	12.043	11.4387	11.4747		+	0.000492017
Clo1313_1371	3-dehydroquinate dehydratase (EC 4.2.1.10)	8	16.9898	18.9564	13.0397	18.8113		19.642	18.1309	18.9391		16.9898	18.9564	13.0397	18.8113	12.123	19.642	18.1309	18.9391			0.811126
Clo1313_1372	peptidase M24	17	15.8426	17.5818	17.7339	17.991	16.2154	17.8412	17.9014	17.715		15.8426	17.5818	17.7339	17.991	16.2154	17.8412	17.9014	17.715			0.511847
Clo1313_1373	translation elongation factor P (EF-P)	26	22.4084	20.9312	21.7712	22.5775	22.366	22.701	22.6332	21.7047		22.4084	20.9312	21.7712	22.5775	22.366	22.701	22.6332	21.7047			0.685739
Clo1313_1385	hypothetical protein	13	19.5479	17.9729	20.5156	19.4625	19.2258	19.2942	19.8135	19.4734		19.5479	17.9729	20.5156	19.4625	19.2258	19.2942	19.8135	19.4734			0.416835
Clo1313_1387	NusB antitermination factor	9		14.0017	14.0831	13.0376			14.9685	14.0624		13.903	14.0017	14.0831	13.0376	12.8107	11.43	14.9685	14.0624			0.0941428
Clo1313_1388	Exodeoxyribonuclease VII large subunit (EC 3.1.11.6)	13			13.8596				13.7058	16.2398		11.7736	13.4556	13.8596	12.7221	12.4295	11.58	13.7058	16.2398			0.215861
Clo1313_1390	Polyprenyl synthetase	16	17.3292	14.399	17.8634	17.3796	16.7776	18.2651	18.8957	17.903		17.3292	14.399	17.8634	17.3796	16.7776	18.2651	18.8957	17.903			0.339893
Clo1313_1396	non-processive endocellulase	5					16.8842	17.3135				10.8225	12.4411	13.5308	11.519	16.8842	17.3135	11.5986	9.9869		+	0.0148527
Clo1313_1397	copper amine oxidase-like domain-containing protein	28	16.2413	15.0892	16.2586	14.438	17.364	13.7078	15.9688	13.5234		16.2413	15.0892	16.2586	14.438	17.364	13.7078	15.9688	13.5234			0.949655
Clo1313_1400	hypothetical protein	14					15.9558	17.5352				11.6916	12.0249	12.414	11.7118	15.9558	17.5352	11.5798	10.9426		+	0.0035075
Clo1313_1401	ABC transporter related protein	14					18.5927	17.0489				12.1203	11.6476	10.9679	10.967	18.5927	17.0489	11.7912	12.3537		+	0.0010983
Clo1313_1404	diguanylate cyclase with TPR repeats	29	16.6266	14.2218	15.0953							16.6266	14.2218	15.0953	11.8797	10.9972	11.3215	10.7257	12.5702			0.153243
Clo1313_1405	ATP-NAD/AcoX kinase	17	17.5113	15.3525	16.9846	15.4106	16.8516	19.2614	17.9298	18.4868		17.5113	15.3525	16.9846	15.4106	16.8516	19.2614	17.9298	18.4868			0.378389
Clo1313_1407	DNA replication and repair protein RecN	30	18.009	18.0914	17.7866	18.3135	17.8639	18.663	15.9232	18.3797		18.009	18.0914	17.7866	18.3135	17.8639	18.663	15.9232	18.3797			0.667107
Clo1313_1409	sporulation transcriptional activator Spo0A	19					18.1886	19.2424				12.0259	11.2238	10.5282	12.0954	18.1886	19.2424	11.9502	12.9653		+	0.00221474
Clo1313_1410	response regulator receiver protein	8	18.813	19.7472	19.4129							18.813	19.7472	19.4129	13.4306	10.6946	11.6442	10.6602	10.9472		+	0.0426948
Clo1313_1411	CheA signal transduction histidine kinase	31	20.024	19.7488	17.0863							20.024	19.7488	17.0863	13.1867	11.4009	10.4419	11.3888	9.97266		+	0.0102128
Clo1313_1412	CheW protein	11	18.0806	16.0189	16.4702							18.0806	16.0189	16.4702	12.1211	11.6574	12.255	12.2138	12.9546			0.131401
Clo1313_1414	response regulator receiver modulated CheB methylesterase	7	12.6469	10.967								12.6469	10.967	10.6582	11.6156	13.0394	13.1294	10.818	11.3543			0.13221
Clo1313_1416	response regulator receiver protein	8	17.9341	17.686	16.275							17.9341	17.686	16.275	9.05094	10.3982	9.42403	11.8216	12.0078			0.133912
Clo1313_1422	integral membrane sensor signal transduction histidine kinase	6					13.3357	12.6612				11.876	11.4419	11.8846	12.2629	13.3357	12.6612	11.6682	14.0167			0.470981
Clo1313_1424	lipolytic protein G-D-S-L family	8					19.2784	17.7411				13.6398	12.1963	12.463	12.9024	19.2784	17.7411	12.404	11.4518		+	0.00424
Clo1313_1427	aluminum resistance family protein	19	18.1938	18.8806	18.8571	18.0148	17.476	17.053	18.7993	17.9417		18.1938	18.8806	18.8571	18.0148	17.476	17.053	18.7993	17.9417			0.179952
Clo1313_1428	hypothetical protein	8	16.1805	16.201	13.4594	13.5805			14.5891			16.1805	16.201	13.4594	13.5805	11.785	11.0988	14.5891	11.5697			0.05159
Clo1313_1429	alanine racemase domain protein	15		17.708	15.7563	17.7319	14.6735	19.1369	15.3413	19.3629		11.2905	17.708	15.7563	17.7319	14.6735	19.1369	15.3413	19.3629			0.811014
Clo1313_1430	protein of unknown function DUF552	6	17.5706		16.5118	17.7318	16.8941	18.0263	17.8427	18.2741		17.5706	12.0602	16.5118	17.7318	16.8941	18.0263	17.8427	18.2741			0.490268
Clo1313_1433	DivIVA domain	10	16.8894		16.7071		18.4959	15.6053	16.6515			16.8894	9.66008	16.7071	12.951	18.4959	15.6053	16.6515	10.2355			0.748599
Clo1313_1434	Isoleucyl-tRNA synthetase (EC 6.1.1.5)	57	19.695	19.1464	19.6646	18.9832	18.0583	18.6956	18.9651	18.9565		19.695	19.1464	19.6646	18.9832	18.0583	18.6956	18.9651	18.9565			0.154738
Clo1313_1435	3-dehydroquinate synthase (EC 4.2.3.4)	18	18.4193	18.6472	17.8327	16.7904	16.6999	18.7639	17.5659	17.4342		18.4193	18.6472	17.8327	16.7904	16.6999	18.7639	17.5659	17.4342			0.533064
Clo1313_1436	hypothetical protein	8				17.5542	19.8542	18.5101	16.3947	18.983		12.4658	11.7037	11.8754	17.5542	19.8542	18.5101	16.3947	18.983			0.112358
Clo1313_1437	hypothetical protein	24	13.7497	14.0567	16.1416	17.2576	14.1354	17.0312	14.5688	17.3914		13.7497	14.0567	16.1416	17.2576	14.1354	17.0312	14.5688	17.3914			0.397004
Clo1313_1438	tRNA-i(6)A37 thiotransferase enzyme MiaB	24	14.1245	15.3184	14.4712	16.1275	14.2036	16.5834	17.0102	16.7432		14.1245	15.3184	14.4712	16.1275	14.2036	16.5834	17.0102	16.7432			0.37389
Clo1313_1439	protein of unknown function DUF534	24	19.5602	18.5676	20.0969				13.6105			19.5602	18.5676	20.0969	13.8566	11.6734	12.6146	13.6105	11.9327			0.104192
Clo1313_1443	copper amine oxidase-like domain-containing protein	9	16.1305	15.1344	15.5196							16.1305	15.1344	15.5196	12.7399	11.9896	11.7631	10.6784	11.674		+	0.0464334
Clo1313_1444	hypothetical protein	14	19.4918	19.3623	18.8765	17.5322	17.7114	14.5238	18.5646	17.3634		19.4918	19.3623	18.8765	17.5322	17.7114	14.5238	18.5646	17.3634			0.227599
Clo1313_1445	DNA mismatch repair protein MutS	19	12.3986	14.3431	14.1579	13.691	12.6759	11.7653	14.6473			12.3986	14.3431	14.1579	13.691	12.6759	11.7653	14.6473	11.0903			0.712456
Clo1313_1446	DNA mismatch repair protein MutL	15	16.9029	15.9656	14.8454	15.38	16.6987		17.1837	15.1903		16.9029	15.9656	14.8454	15.38	16.6987	10.6584	17.1837	15.1903			0.6454
Clo1313_1448	RNA-binding protein Hfq	10	21.6936	21.2971	21.6443	20.4485	22.5891	21.6542	21.3463	20.6014		21.6936	21.2971	21.6443	20.4485	22.5891	21.6542	21.3463	20.6014			0.347517
Clo1313_1449	SOS-response transcriptional repressor, LexA	12	17.5485	18.0166	17.1381	17.4314		13.2181	18.3357	15.4279		17.5485	18.0166	17.1381	17.4314	10.9553	13.2181	18.3357	15.4279		+	0.0361062
Clo1313_1452	signal recognition particle subunit FFH/SRP54 (srp54)	27	17.205	17.296	15.7995	16.9888	15.3332	16.5497	17.7946	18.0768		17.205	17.296	15.7995	16.9888	15.3332	16.5497	17.7946	18.0768			0.0984594
Clo1313_1453	ribosomal protein S16	6	19.2006	19.374	19.0512	19.3769	18.7101	16.8625	18.7822	18.3115		19.2006	19.374	19.0512	19.3769	18.7101	16.8625	18.7822	18.3115			0.24623
Clo1313_1454	RNA-binding protein (KH domain)	8	21.2451	19.5687	19.8237	20.7364	16.9773	19.7475	20.1987	16.1865		21.2451	19.5687	19.8237	20.7364	16.9773	19.7475	20.1987	16.1865			0.540737
Clo1313_1457	LSU ribosomal protein L19P	15	20.8193	21.3955	18.9132	20.2651	19.0785	19.4891	20.1987	19.842		20.8193	21.3955	18.9132	20.2651	19.0785	19.4891	20.1987	19.842			0.101587
Clo1313_1460	hypothetical protein	14	17.1586	18.7501	18.5103	17.3317	18.3058	19.0121	19.3769	19.0146		17.1586	18.7501	18.5103	17.3317	18.3058	19.0121	19.3769	19.0146			0.385389
Clo1313_1467	aminotransferase class I and II	37	20.3818	20.8751	21.4778	20.8447	22.2569	20.5736	22.1391	21.2377		20.3818	20.8751	21.4778	20.8447	22.2569	20.5736	22.1391	21.2377			0.572508
Clo1313_1472	spermidine/putrescine ABC transporter ATPase subunit	24	20.0776	19.6382	19.9837	17.5062	19.1982	20.2704	20.3595	18.4813		20.0776	19.6382	19.9837	17.5062	19.1982	20.2704	20.3595	18.4813			0.785685
Clo1313_1475	extracellular solute-binding protein family 1	16	19.9966	20.3178	19.4799	18.8698	18.4802	20.0051	20.4309	21.0445		19.9966	20.3178	19.4799	18.8698	18.4802	20.0051	20.4309	21.0445			0.167913
Clo1313_1477	glycoside hydrolase family 9	19				16.5799	18.3548	18.5144		18.0173		11.4415	10.8004	12.472	16.5799	18.3548	18.5144	10.9934	18.0173			0.237194
Clo1313_1481	adenylosuccinate lyase	29	20.3404	19.3155	20.1122	19.1008	19.5339	20.3038	20.218	20.1019		20.3404	19.3155	20.1122	19.1008	19.5339	20.3038	20.218	20.1019			0.816252
Clo1313_1482	transcriptional regulator, GntR family	17	19.5921	16.9831	18.5602	15.6147	17.4934		18.3927	16.4209		19.5921	16.9831	18.5602	15.6147	17.4934	11.6659	18.3927	16.4209			0.572784
Clo1313_1483	pyrrolo-quinoline quinone	23	14.4531	13.4774	15.5969		15.9431		15.2995	13.9225		14.4531	13.4774	15.5969	12.7003	15.9431	11.9846	15.2995	13.9225			0.980573
Clo1313_1484	copper ion binding protein	8			14.3556			15.3807	15.0053	15.2897		10.7853	9.69858	14.3556	12.825	10.9681	15.3807	15.0053	15.2897			0.16441
Clo1313_1488	cellulosome anchoring protein cohesin region	7			11.8806	11.5485	13.7409	12.3972				11.3771	11.8205	11.8806	11.5485	13.7409	12.3972	12.0136	12.3086			0.142752
Clo1313_1491	chorismate synthase (EC 4.2.3.5)	41	20.6804	20.6039	21.4351	21.0847	22.0033	22.623	21.8225	21.7446		20.6804	20.6039	21.4351	21.0847	22.0033	22.623	21.8225	21.7446		+	0.0110739
Clo1313_1492	shikimate kinase (EC 2.7.1.71)	10	13.3993		14.0308	10.6109		16.4481	14.2	11.6192		13.3993	9.87142	14.0308	10.6109	12.5031	16.4481	14.2	11.6192			0.69871
Clo1313_1493	hypothetical protein	7	15.1533	15.0355	15.4315	14.8734	15.4503	15.6742	15.2573	15.2309		15.1533	15.0355	15.4315	14.8734	15.4503	15.6742	15.2573	15.2309			0.278451
Clo1313_1495	integrase family protein	17	11.0358	11.686	10.0825	11.333			11.4126			11.0358	11.686	10.0825	11.333	11.1922	11.3025	11.4126	10.5697			0.702966
Clo1313_1497	peptidase M18 aminopeptidase I	30	19.652	18.7311	19.9787	18.0696	18.97	19.0191	20.412	18.6851		19.652	18.7311	19.9787	18.0696	18.97	19.0191	20.412	18.6851			0.931855
Clo1313_1498	response regulator receiver modulated metal dependent phosphohydrolase	26	17.8069	17.5799	18.8076	16.5114	17.3669		18.9598	15.2238		17.8069	17.5799	18.8076	16.5114	17.3669	12.1863	18.9598	15.2238			0.61783
Clo1313_1499	histidinol phosphate phosphatase HisJ family	9	15.4855		15.0523		14.6269	15.4272	13.5602	13.1328		15.4855	11.1568	15.0523	12.088	14.6269	15.4272	13.5602	13.1328			0.776827
Clo1313_1500	tyrosyl-tRNA synthetase (EC 6.1.1.1)	24	19.8604	18.7436	18.5355	17.1832	16.701	17.5164	18.5028	17.9073		19.8604	18.7436	18.5355	17.1832	16.701	17.5164	18.5028	17.9073			0.142382
Clo1313_1501	tRNA (5-methylaminomethyl-2-thiouridylate)-methyltransferase (EC 2.1.1.61)	15	17.4129	18.2644	17.9876	17.5965	18.0506	18.3201	18.4993	17.7822		17.4129	18.2644	17.9876	17.5965	18.0506	18.3201	18.4993	17.7822			0.732471
Clo1313_1502	FeS cluster assembly scaffold protein NifU	16	22.2613	19.4195	21.4302	20.3209	22.5538	18.8469	22.5601	20.1535		22.2613	19.4195	21.4302	20.3209	22.5538	18.8469	22.5601	20.1535			0.985385
Clo1313_1503	cysteine desulfurase NifS	21	21.5575	19.2385	22.0059	18.741	21.0774	20.6529	21.5941	19.7858		21.5575	19.2385	22.0059	18.741	21.0774	20.6529	21.5941	19.7858			0.984935
Clo1313_1507	MCP methyltransferase, CheR-type	9	13.5904	18.0233	15.1572			15.0228	17.2483			13.5904	18.0233	15.1572	11.2502	11.8513	15.0228	17.2483	11.4355			0.836201
Clo1313_1508	nucleoside diphosphate kinase (EC 2.7.4.6)	6	17.5853		18.2566		16.1343	15.7275	19.1629	15.6992		17.5853	11.4598	18.2566	11.132	16.1343	15.7275	19.1629	15.6992			0.832384
Clo1313_1509	adenosylmethionine decarboxylase proenzyme (EC 4.1.1.50)	8	14.8579	13.8615								14.8579	13.8615	12.0359	10.6947	11.9733	11.3324	11.9788	11.7052		+	0.0279679
Clo1313_1510	4-hydroxy-3-methylbut-2-enyl diphosphate reductase (EC 1.17.1.2)	60	20.7878	19.6014	19.7387	19.2345	19.6737	18.7725	19.5854	19.0475		20.7878	19.6014	19.7387	19.2345	19.6737	18.7725	19.5854	19.0475			0.43974
Clo1313_1511	1-acyl-sn-glycerol-3-phosphate acyltransferase (EC 2.3.1.51)	8	16.8767	16.1151		17.2294	15.2271	17.7885	18.2074	17.1668		16.8767	16.1151	10.8883	17.2294	15.2271	17.7885	18.2074	17.1668			0.568594
Clo1313_1512	cytidylate kinase (EC 2.7.4.14)	19	15.9165	16.8329	17.147	15.9473	16.0517	17.9702	16.019	17.5334		15.9165	16.8329	17.147	15.9473	16.0517	17.9702	16.019	17.5334			0.925517
Clo1313_1513	chorismate mutase (EC 5.4.99.5)	8	20.2824	20.4974	18.3432	19.8667	19.6375	21.6046	20.5955	21.1552		20.2824	20.4974	18.3432	19.8667	19.6375	21.6046	20.5955	21.1552			0.339888
Clo1313_1518	transcriptional regulator, RpiR family	17	16.2846	13.6229	16.9504	15.4239	17.6459	15.7494	15.438	13.7159		16.2846	13.6229	16.9504	15.4239	17.6459	15.7494	15.438	13.7159			0.476884
Clo1313_1523	Conserved carboxylase region	48	22.4739	22.0999	22.5822	22.41	21.3384	20.9214	22.2604	22.1342		22.4739	22.0999	22.5822	22.41	21.3384	20.9214	22.2604	22.1342		+	0.0100584
Clo1313_1524	biotin/lipoyl attachment domain-containing protein	7	21.6755	19.9593	21.7543	20.0923	20.5348	17.6667	20.9351	19.4376		21.6755	19.9593	21.7543	20.0923	20.5348	17.6667	20.9351	19.4376			0.602897
Clo1313_1525	sodium pump decarboxylase gamma subunit	3		17.5534	14.4936	18.1021						11.2916	17.5534	14.4936	18.1021	11.4364	11.7246	9.84527	12.8244			0.346468
Clo1313_1526	carboxyl transferase	47	22.1756	21.9089	21.7191	21.42	20.1943	20.0304	21.4672	21.0557		22.1756	21.9089	21.7191	21.42	20.1943	20.0304	21.4672	21.0557		+	0.00329151
Clo1313_1529	agmatinase (EC 3.5.3.11)	9	17.2167	16.2153	16.4559	16.2937	17.1672	17.2799		16.5295		17.2167	16.2153	16.4559	16.2937	17.1672	17.2799	11.8086	16.5295			0.404286
Clo1313_1530	spermidine synthase	23	21.084	20.0229	19.483	19.8885	19.908	21.9358	20.4095	20.659		21.084	20.0229	19.483	19.8885	19.908	21.9358	20.4095	20.659			0.554182
Clo1313_1535	chromosome segregation and condensation protein, ScpB	4	14.9466	13.4637								14.9466	13.4637	10.8795	12.8017	14.0781	11.6727	10.4014	11.0135			0.161742
Clo1313_1537	tryptophanyl-tRNA synthetase (EC 6.1.1.2)	21	19.9597	18.9105	19.1926	18.6388	18.2288	19.8586	19.7331	19.1628		19.9597	18.9105	19.1926	18.6388	18.2288	19.8586	19.7331	19.1628			0.845236
Clo1313_1540	diaminopimelate decarboxylase	26	15.0464	15.3508	16.4496	15.803	17.6011	15.5572	17.537	15.5188		15.0464	15.3508	16.4496	15.803	17.6011	15.5572	17.537	15.5188			0.578348
Clo1313_1542	IMP dehydrogenase	42	21.1438	20.7361	21.4673	20.5733	19.8348	20.1584	21.7827	21.629		21.1438	20.7361	21.4673	20.5733	19.8348	20.1584	21.7827	21.629		+	0.0431234
Clo1313_1545	thymidine phosphorylase (EC 2.4.2.4)	21	14.5908	12.3839	16.6833	11.1624	14.7942	15.3217	13.9024	14.0364		14.5908	12.3839	16.6833	11.1624	14.7942	15.3217	13.9024	14.0364			0.891011
Clo1313_1546	phosphopentomutase	19	17.977	18.6011	17.8072	19.4675	18.6056	19.1695	18.7113	18.5184		17.977	18.6011	17.8072	19.4675	18.6056	19.1695	18.7113	18.5184			0.841117
Clo1313_1547	tyrosine recombinase XerD	31	16.8651	16.4626			20.2873	19.7059				16.8651	16.4626	11.9019	10.8468	20.2873	19.7059	11.9695	12.6404		+	0.000210215
Clo1313_1549	NUDIX hydrolase	14	13.8413		17.8819	11.1472	16.4666	11.8794	16.4794	11.5036		13.8413	12.1104	17.8819	11.1472	16.4666	11.8794	16.4794	11.5036			0.970573
Clo1313_1551	pyrroline-5-carboxylate reductase	18	18.6564	16.9244	19.3002	16.8247	18.6095	17.6197	19.2379	18.1047		18.6564	16.9244	19.3002	16.8247	18.6095	17.6197	19.2379	18.1047			0.896932
Clo1313_1558	protease FtsH subunit HflC	19	19.6118	19.3444	19.2476	17.9233	19.3019	18.4345	18.943	19.6919		19.6118	19.3444	19.2476	17.9233	19.3019	18.4345	18.943	19.6919			0.532682
Clo1313_1559	protease FtsH subunit HflK	18	13.5669	15.0839	12.9665	14.6476	12.9821	12.9587	14.0332	13.571		13.5669	15.0839	12.9665	14.6476	12.9821	12.9587	14.0332	13.571			0.49975
Clo1313_1563	Ricin B lectin	6					16.1949	14.9842				12.7765	11.8469	11.6365	12.0063	16.1949	14.9842	9.94385	11.4196		+	0.0117493
Clo1313_1567	hypothetical protein	6	15.5728	15.9467	17.182	13.0937	19.0813	19.3807	16.6556	16.7946		15.5728	15.9467	17.182	13.0937	19.0813	19.3807	16.6556	16.7946			0.15413
Clo1313_1569	type IV pilus assembly protein PilM	23	17.8436	18.1193								17.8436	18.1193	12.9531	9.63448	11.2822	12.7474	12.0223	11.6842		+	0.0184959
Clo1313_1571	iron-only hydrogenase maturation protein HydG	17	17.2257	17.9348				21.5561				17.2257	17.9348	12.2983	11.3547	12.5941	21.5561	10.296	11.8009			0.226953
Clo1313_1572	hypothetical protein	4	14.5877						17.7143	18.266		14.5877	10.4473	11.9376	10.7465	11.2461	10.3288	17.7143	18.266		+	0.0307434
Clo1313_1578	glutamyl-tRNA synthetase	23	18.8736	19.2463	16.9131	16.046	17.0029	17.8636	16.4425	17.0694		18.8736	19.2463	16.9131	16.046	17.0029	17.8636	16.4425	17.0694		+	0.0226107
Clo1313_1580	ribonucleoside-triphosphate reductase class III catalytic subunit (EC 1.17.4.2)	22	17.3119	17.8703	16.487							17.3119	17.8703	16.487	13.0576	10.9202	11.4775	11.686	12.1936		+	0.0219091
Clo1313_1581	methionine synthase (B12-dependent) (EC 2.1.1.13)	49	18.4875	17.6301	17.5027	16.7492	17.4465	17.0431	16.6394	17.4705		18.4875	17.6301	17.5027	16.7492	17.4465	17.0431	16.6394	17.4705			0.321504
Clo1313_1587	Dockerin type 1	6					13.9754	12.5494				10.6768	10.9466	9.23496	11.6999	13.9754	12.5494	12.7868	12.5771			0.120415
Clo1313_1588	glycoside hydrolase family 13 domain protein	8	14.6094	15.3401			15.0323					14.6094	15.3401	12.7101	11.845	15.0323	11.2697	12.2062	12.3706			0.309985
Clo1313_1589	FHA domain containing protein	36	16.635	15.3507	16.0996		16.0045	15.2774		15.5619		16.635	15.3507	16.0996	11.5355	16.0045	15.2774	11.7721	15.5619			0.635717
Clo1313_1590	hypothetical protein	14	22.5907	22.3265	21.1216	21.8851	23.1098	20.2277	21.8371	21.4934		22.5907	22.3265	21.1216	21.8851	23.1098	20.2277	21.8371	21.4934			0.80798
Clo1313_1599	type II secretion system protein E	26	18.7391	19.425	18.7747	18.0939	19.0828	19.3641	18.1658	18.4986		18.7391	19.425	18.7747	18.0939	19.0828	19.3641	18.1658	18.4986			0.166449
Clo1313_1600	hypothetical protein	13	12.6738	14.9517	14.4166	11.3858	12.1575	11.972	14.3613			12.6738	14.9517	14.4166	11.3858	12.1575	11.972	14.3613	12.6552			0.675155
Clo1313_1601	hypothetical protein	18	16.4197	16.9063	16.5361	17.1456	16.5017	17.4914	16.8379	16.6418		16.4197	16.9063	16.5361	17.1456	16.5017	17.4914	16.8379	16.6418			0.888606
Clo1313_1602	hypothetical protein	16	16.6498	18.2748	16.7718	17.7127	15.8215	18.2301	18.7907	17.8398		16.6498	18.2748	16.7718	17.7127	15.8215	18.2301	18.7907	17.8398			0.702894
Clo1313_1603	glycoside hydrolase family 9	28	15.659		14.6905	16.4843	18.1525	17.5415	14.8332	16.7923		15.659	12.478	14.6905	16.4843	18.1525	17.5415	14.8332	16.7923			0.230888
Clo1313_1604	glycoside hydrolase family 9	31					16.1838	15.4007				11.9869	13.1633	11.5707	12.4942	16.1838	15.4007	12.2758	11.5815		+	0.0107325
Clo1313_1606	methylthioadenosine phosphorylase (EC 2.4.2.28)	22	18.1745	19.6397								18.1745	19.6397	11.2711	10.9894	12.0396	11.3041	11.4725	11.9364		+	0.00058517
Clo1313_1607	methylthioribose-1-phosphate isomerase (EC 5.3.1.23)	17	18.7935	18.4672	18.7433	17.2201	16.9438	17.1739	18.418	18.285		18.7935	18.4672	18.7433	17.2201	16.9438	17.1739	18.418	18.285			0.157798
Clo1313_1610	ferrous iron transport protein B	15	15.8	15.9725	14.2236	16.2751	17.084		13.3233	17.5651		15.8	15.9725	14.2236	16.2751	17.084	11.0416	13.3233	17.5651			0.914511
Clo1313_1612	AAA ATPase central domain protein	16	17.0239	16.5662	16.7951	16.1109	14.9285	15.6366	17.1429			17.0239	16.5662	16.7951	16.1109	14.9285	15.6366	17.1429	13.346			0.621581
Clo1313_1613	amino acid-binding ACT domain protein	9	17.213	20.2585	19.5741	18.7231	20.386	20.4648	20.4411	19.2268		17.213	20.2585	19.5741	18.7231	20.386	20.4648	20.4411	19.2268			0.565307
Clo1313_1614	phenylacetate-CoA ligase (EC 6.2.1.30)	36	20.5584	20.3943	20.7842	20.6054	20.7096	21.5294	21.383	21.4399		20.5584	20.3943	20.7842	20.6054	20.7096	21.5294	21.383	21.4399			0.113239
Clo1313_1615	indolepyruvate ferredoxin oxidoreductase, beta subunit	21	20.3645	19.6068	20.3152	19.7472	19.7243	20.2701	20.5295	20.403		20.3645	19.6068	20.3152	19.7472	19.7243	20.2701	20.5295	20.403			0.595219
Clo1313_1616	indolepyruvate ferredoxin oxidoreductase, alpha subunit	38	20.1973	21.1843	20.4217	20.3618	19.3521	21.462	21.1691	20.8439		20.1973	21.1843	20.4217	20.3618	19.3521	21.462	21.1691	20.8439			0.862961
Clo1313_1617	SSS sodium solute transporter superfamily	13	17.4831	13.7901	19.0147	18.7492	18.3942	18.1586	19.1869	20.1207		17.4831	13.7901	19.0147	18.7492	18.3942	18.1586	19.1869	20.1207			0.138071
Clo1313_1618	RNA-metabolising metallo-beta-lactamase	24	16.982	17.8057	16.1558	17.6428	16.2392	16.7947	17.1399	15.8254		16.982	17.8057	16.1558	17.6428	16.2392	16.7947	17.1399	15.8254			0.655569
Clo1313_1620	peptidase M42 family protein	15	19.3468	16.5946	18.1813	16.764	16.6592	18.3638	18.8578	16.4639		19.3468	16.5946	18.1813	16.764	16.6592	18.3638	18.8578	16.4639			0.985563
Clo1313_1621	Cellulase	12	13.9445	14.0331	13.1201	12.4888		15.0994	13.6561	12.1328		13.9445	14.0331	13.1201	12.4888	10.8126	15.0994	13.6561	12.1328			0.868769
Clo1313_1622	peptidase M42 family protein	13	16.1555	17.7728		14.9939	12.0857	18.2827	16.2096	15.7568		16.1555	17.7728	11.5091	14.9939	12.0857	18.2827	16.2096	15.7568			0.579624
Clo1313_1624	NLP/P60 protein	4	15.14	16.3601		14.0777						15.14	16.3601	11.928	14.0777	12.6653	10.226	12.7063	12.7137			0.0944557
Clo1313_1627	hydroxymethylpyrimidine synthase	28	20.8328	20.6497	19.1163	20.0086	20.1657	20.2672	20.4249	19.9098		20.8328	20.6497	19.1163	20.0086	20.1657	20.2672	20.4249	19.9098			0.135826
Clo1313_1628	thiamine-phosphate pyrophosphorylase	24	19.4671	20.178	17.4171	19.5235	19.0421	20.2423	19.277	20.2696		19.4671	20.178	17.4171	19.5235	19.0421	20.2423	19.277	20.2696			0.51656
Clo1313_1629	thiamine biosynthesis protein ThiF	3				14.1206			14.6701	15.6213		12.188	11.3868	10.6109	14.1206	11.7082	11.6287	14.6701	15.6213			0.153467
Clo1313_1630	tyrosine lyase ThiH	23	16.7937	18.5966	16.3525	17.8908	17.8087	19.0061	18.742	19.1989		16.7937	18.5966	16.3525	17.8908	17.8087	19.0061	18.742	19.1989			0.355586
Clo1313_1631	thiazole-phosphate synthase	23	20.4492	19.289	19.2437	19.4488	19.8006	20.0506	20.4877	21.0169		20.4492	19.289	19.2437	19.4488	19.8006	20.0506	20.4877	21.0169			0.150108
Clo1313_1632	thiamine biosynthesis protein ThiS	5	19.9401	16.9426	17.1125	16.3969	17.9522	16.1527	18.3751	17.4568		19.9401	16.9426	17.1125	16.3969	17.9522	16.1527	18.3751	17.4568			0.594598
Clo1313_1633	ribosome biogenesis GTP-binding protein YsxC	11			17.5518		18.6294	18.8448	17.9496	17.9845		11.5212	11.8677	17.5518	11.7413	18.6294	18.8448	17.9496	17.9845			0.0781528
Clo1313_1637	copper amine oxidase-like domain-containing protein	10	18.1387	17.5264	17.338		17.6643		16.9507			18.1387	17.5264	17.338	13.1896	17.6643	11.2438	16.9507	11.3257			0.704155
Clo1313_1647	hypothetical protein	10	11.6877				11.5335	10.7884				11.6877	12.0467	12.3893	12.8394	11.5335	10.7884	12.2171	13.978			0.165269
Clo1313_1653	protein of unknown function DUF503	5	15.6707				17.1408	17.5061	15.1322	17.6099		15.6707	13.4302	11.245	11.4754	17.1408	17.5061	15.1322	17.6099		+	0.0261325
Clo1313_1654	response regulator receiver protein	11	15.6411					15.4882	15.21	15.9964		15.6411	11.1692	11.7052	11.9086	12.1884	15.4882	15.21	15.9964			0.406814
Clo1313_1656	Fibronectin-binding A domain protein	21	14.8904	12.2283	14.7554	13.0669	15.6075	14.7836	16.051	14.1345		14.8904	12.2283	14.7554	13.0669	15.6075	14.7836	16.051	14.1345			0.569643
Clo1313_1657	aminotransferase class I and II	33	20.6433	20.4276	20.0297	19.2626	19.435	20.2369	21.1218	21.0985		20.6433	20.4276	20.0297	19.2626	19.435	20.2369	21.1218	21.0985			0.0639178
Clo1313_1658	nitroreductase	9	18.1697	16.7676	19.2199	19.1798	17.9964	19.0521	19.7497	18.2149		18.1697	16.7676	19.2199	19.1798	17.9964	19.0521	19.7497	18.2149			0.295922
Clo1313_1659	endoglucanase Cel9R	30	12.8704		14.0408	14.2146	17.9372	15.1796		10.9459		12.8704	10.6884	14.0408	14.2146	17.9372	15.1796	11.2707	10.9459		+	0.037616
Clo1313_1663	serine/threonine protein kinase with PASTA sensor(s)	27	19.9807	18.3151	19.4451	18.9696	19.5048	18.0622	19.6722	18.2143		19.9807	18.3151	19.4451	18.9696	19.5048	18.0622	19.6722	18.2143			0.965299
Clo1313_1664	protein serine/threonine phosphatase	8	17.717	14.7966	17.4514	15.7779	16.8904	16.8196	17.7271	16.6229		17.717	14.7966	17.4514	15.7779	16.8904	16.8196	17.7271	16.6229			0.89711
Clo1313_1665	23S rRNA m(2)A-2503 methyltransferase (EC 2.1.1.192)	11	17.3101	14.0809	14.1897	16.0862	17.2886		16.259	13.8789		17.3101	14.0809	14.1897	16.0862	17.2886	12.7601	16.259	13.8789			0.988259
Clo1313_1666	NusB antitermination factor	19	16.1332	17.4186	16.6091	17.7701	14.3982	16.9872	16.0037	17.2153		16.1332	17.4186	16.6091	17.7701	14.3982	16.9872	16.0037	17.2153			0.663011
Clo1313_1667	peptidase membrane zinc metallopeptidase	4	15.0025	16.391	16.433	16.5805		14.4041	16.3089	15.6971		15.0025	16.391	16.433	16.5805	13.5024	14.4041	16.3089	15.6971			0.0540899
Clo1313_1669	methionyl-tRNA formyltransferase (EC 2.1.2.9)	17	15.9284	18.5582	17.1148	17.4649	15.4704	19.1433	18.0417	17.6555		15.9284	18.5582	17.1148	17.4649	15.4704	19.1433	18.0417	17.6555			0.976638
Clo1313_1670	peptide deformylase (EC 3.5.1.88)	8	19.2904	19.5234	19.3359	18.3659	17.9402		19.8382	18.2942		19.2904	19.5234	19.3359	18.3659	17.9402	11.848	19.8382	18.2942			0.290867
Clo1313_1672	hypothetical protein	6	14.0719	12.4371	17.797	16.5135	19.7261		18.1453			14.0719	12.4371	17.797	16.5135	19.7261	12.1789	18.1453	10.8528			0.758935
Clo1313_1673	Polyprenyl synthetase	9	17.3251	17.9107	19.2194	17.4241	18.4229	18.9582	19.491			17.3251	17.9107	19.2194	17.4241	18.4229	18.9582	19.491	10.7246			0.69307
Clo1313_1677	FAD-dependent pyridine nucleotide-disulfide oxidoreductase	31	19.4423	19.2551	18.7629	18.8938	20.2451	20.6908	19.8981	19.183		19.4423	19.2551	18.7629	18.8938	20.2451	20.6908	19.8981	19.183		+	0.0256894
Clo1313_1678	single-strand binding protein/Primosomal replication protein n	10	19.0639	18.0123	17.4945							19.0639	18.0123	17.4945	11.7363	12.4801	13.1962	12.0635	10.9936			0.101928
Clo1313_1682	PpiC-type peptidyl-prolyl cis-trans isomerase	44	20.1557	20.0043	20.3559	20.7502	21.3053	22.6636	20.2675	21.7314		20.1557	20.0043	20.3559	20.7502	21.3053	22.6636	20.2675	21.7314			0.195425
Clo1313_1683	phosphoribosylformylglycinamidine synthase (EC 6.3.5.3)	85	19.1363	18.1259	16.5776	16.8111	17.9557	19.6721	18.399	18.9819		19.1363	18.1259	16.5776	16.8111	17.9557	19.6721	18.399	18.9819			0.11691
Clo1313_1685	transcriptional regulator, XRE family with cupin sensor	13	21.3414	21.7055	21.4014	20.762	20.8649	20.8281	22.2215	21.2224		21.3414	21.7055	21.4014	20.762	20.8649	20.8281	22.2215	21.2224			0.310156
Clo1313_1686	AMP-dependent synthetase and ligase	44	21.2339	21.5323	21.7465	21.2514	20.1581	21.3688	22.2345	21.3815		21.2339	21.5323	21.7465	21.2514	20.1581	21.3688	22.2345	21.3815			0.412024
Clo1313_1687	Heat shock protein Hsp90-like protein	24	15.1953	15.1531	11.9113	17.6016	15.6386					15.1953	15.1531	11.9113	17.6016	15.6386	11.7382	11.7904	11.1028			0.505182
Clo1313_1689	ABC transporter related protein	8	16.3835	17.1131	17.6561	17.3384	16.4294	16.4192	16.6156	17.3711		16.3835	17.1131	17.6561	17.3384	16.4294	16.4192	16.6156	17.3711			0.179202
Clo1313_1690	periplasmic solute binding protein	11	14.1968	15.5062	15.4266	16.4444		16.5102	17.322	16.8437		14.1968	15.5062	15.4266	16.4444	10.979	16.5102	17.322	16.8437			0.486393
Clo1313_1694	endoglucanase Cel9W	19	17.4492	14.6811	16.9587	18.4167	21.0317	19.1575		17.8935		17.4492	14.6811	16.9587	18.4167	21.0317	19.1575	11.3477	17.8935			0.328386
Clo1313_1696	peptidase M24	10	18.2343		17.9428	14.1931	18.6111	16.497	18.3392	17.6176		18.2343	9.58581	17.9428	14.1931	18.6111	16.497	18.3392	17.6176			0.66087
Clo1313_1698	ABC transporter related protein	7	12.6586		13.7659			15.2681	15.5209	11.948		12.6586	11.2934	13.7659	12.2091	12.1925	15.2681	15.5209	11.948			0.750513
Clo1313_1701	glycoside hydrolase family 5	20			15.1441	17.5792	19.3645	18.2778	14.349	18.4545		11.2419	12.2726	15.1441	17.5792	19.3645	18.2778	14.349	18.4545			0.06525
Clo1313_1712	sodium ion-translocating decarboxylase, beta subunit	6	19.136		18.7378		19.2729		20.2101	20.3081		19.136	12.0854	18.7378	10.4872	19.2729	13.5901	20.2101	20.3081			0.623388
Clo1313_1716	pyruvate formate-lyase activating enzyme	9	16.4914	15.0147								16.4914	15.0147	12.8	13.5494	11.1195	11.7668	12.4892	11.6477		+	0.0122079
Clo1313_1717	formate acetyltransferase	45	21.2509	21.075				14.4462				21.2509	21.075	12.398	11.7662	11.5429	14.4462	12.224	12.0793		+	0.00251797
Clo1313_1718	Capsule synthesis protein, CapA	10	13.5319	12.9339	13.1686	12.2473	12.6098	12.5612	12.5296	16.0751		13.5319	12.9339	13.1686	12.2473	12.6098	12.5612	12.5296	16.0751			0.594455
Clo1313_1724	protein of unknown function DUF342	41	18.995	20.1086	19.604	18.7685	17.3348	17.9962	20.2565	19.9374		18.995	20.1086	19.604	18.7685	17.3348	17.9962	20.2565	19.9374		+	0.0451502
Clo1313_1728	CheC, inhibitor of MCP methylation	4	17.802	19.331	16.996				17.3898			17.802	19.331	16.996	12.4802	12.0112	13.4984	17.3898	13.0117			0.241367
Clo1313_1729	CheW protein	10	19.3721	20.1408	17.8597	17.6237			18.1419	18.372		19.3721	20.1408	17.8597	17.6237	11.6016	11.8025	18.1419	18.372		+	4.45684e-05
Clo1313_1730	CheA signal transduction histidine kinase	34	19.4532	17.7756	18.8618	14.0011	16.7496		19.2571	17.6245		19.4532	17.7756	18.8618	14.0011	16.7496	8.73844	19.2571	17.6245			0.395662
Clo1313_1731	response regulator receiver modulated CheB methylesterase	10	19.0713	14.7035	18.2533				17.3633			19.0713	14.7035	18.2533	12.0874	11.6275	10.4801	17.3633	12.3227			0.429772
Clo1313_1734	flagellar biosynthetic protein FlhF	21	18.5051	19.8259	18.3944	16.8436			18.3466	13.2496		18.5051	19.8259	18.3944	16.8436	11.7193	11.5212	18.3466	13.2496			0.0641611
Clo1313_1735	flagellar biosynthesis protein FlhA	12	16.9314	16.4212	13.9907				13.7965			16.9314	16.4212	13.9907	12.8862	11.0304	12.7018	13.7965	13.0815		+	0.0143685
Clo1313_1741	response regulator receiver protein	9	21.2489	23.0016	17.9717				20.2723	20.6419		21.2489	23.0016	17.9717	11.6204	12.3115	11.3663	20.2723	20.6419		+	0.0340655
Clo1313_1742	CheC, inhibitor of MCP methylation / FliN fusion protein	15	18.983	20.0332	17.1358				17.036			18.983	20.0332	17.1358	11.8308	10.6145	12.5658	17.036	11.9988			0.16073
Clo1313_1743	flagellar motor switch protein FliM	8	16.6556	15.0734	17.6266							16.6556	15.0734	17.6266	12.2005	11.874	11.4596	10.6694	13.4907			0.300924
Clo1313_1744	flagellar basal body-associated protein FliL	3	15.3082	17.6964								15.3082	17.6964	11.4445	11.6694	11.2843	11.5572	10.7579	12.7056		+	0.0243145
Clo1313_1746	flagellar hook-basal body protein	17	18.6615	16.8482	14.0572							18.6615	16.8482	14.0572	11.0731	12.0443	11.7084	12.5994	13.3866		+	0.0305379
Clo1313_1750	hypothetical protein	14	16.0833	15.7014	11.6732			10.4728	14.2168			16.0833	15.7014	11.6732	11.5547	12.6835	10.4728	14.2168	12.5538		+	0.0330945
Clo1313_1754	flagellar motor switch protein FliG	11	17.6697	18.7418								17.6697	18.7418	11.4551	10.6367	12.066	12.6595	13.3679	11.6897		+	0.00287246
Clo1313_1755	flagellar M-ring protein FliF	16	12.3986	16.0944								12.3986	16.0944	11.1216	11.8174	12.033	11.272	12.3504	12.2202			0.294422
Clo1313_1759	gid protein	16	16.5276	16.678	17.4487	14.6714	18.3024	17.2128	15.3608			16.5276	16.678	17.4487	14.6714	18.3024	17.2128	15.3608	10.1099			0.251363
Clo1313_1760	DNA topoisomerase I	32	17.0103	15.8715	15.6036		17.4876	16.251	13.1144	14.6232		17.0103	15.8715	15.6036	11.2695	17.4876	16.251	13.1144	14.6232			0.249009
Clo1313_1764	protein of unknown function UPF0047	8	19.6987	18.0994	19.0794	15.6669	20.1643	20.9037	18.3334	15.5638		19.6987	18.0994	19.0794	15.6669	20.1643	20.9037	18.3334	15.5638			0.271968
Clo1313_1768	cellulosome anchoring protein cohesin region	6	18.1475	18.8216	14.8091				16.4245			18.1475	18.8216	14.8091	12.9146	11.9349	11.8596	16.4245	12.5446			0.0524157
Clo1313_1769	protein of unknown function DUF115	20	17.137		18.1056		15.3351	15.7712	16.6036	15.4842		17.137	12.5381	18.1056	13.1464	15.3351	15.7712	16.6036	15.4842			0.964614
Clo1313_1770	ATP-cone domain protein	15	17.8715	17.62	17.9501	15.6185	17.8924	15.7679	16.4351	17.9646		17.8715	17.62	17.9501	15.6185	17.8924	15.7679	16.4351	17.9646			0.853963
Clo1313_1775	cell division protein FtsZ	25	20.8973	21.0868	20.6226	20.0018	20.3658	18.9618	20.045	20.0464		20.8973	21.0868	20.6226	20.0018	20.3658	18.9618	20.045	20.0464			0.243655
Clo1313_1776	cell division protein FtsA	18	14.9997	19.0006	14.9596	14.4924	13.2165		13.9987	20.1985		14.9997	19.0006	14.9596	14.4924	13.2165	12.825	13.9987	20.1985			0.439072
Clo1313_1780	domain of unknown function DUF1727	15	17.8814	14.7768	17.0736	14.6413	13.1842	15.4216	17.1076	14.5553		17.8814	14.7768	17.0736	14.6413	13.1842	15.4216	17.1076	14.5553			0.725546
Clo1313_1781	CobB/CobQ domain protein glutamine amidotransferase	5	18.5418	18.0948	20.1727	19.3515	19.0129	20.2371	19.9985	19.8382		18.5418	18.0948	20.1727	19.3515	19.0129	20.2371	19.9985	19.8382			0.123775
Clo1313_1788	endoglucanase Cel9P	19	15.296		17.3739	17.4995	18.4488	16.6718		15.6743		15.296	11.968	17.3739	17.4995	18.4488	16.6718	10.3969	15.6743			0.22813
Clo1313_1790	hypothetical protein	7	22.9193	21.4113	22.9349	22.1242	21.3757	20.0466	23.1848	19.1069		22.9193	21.4113	22.9349	22.1242	21.3757	20.0466	23.1848	19.1069			0.677995
Clo1313_1791	hydrogenase, Fe-only	66	23.9483	23.6799	23.9156	23.6654	22.446	21.9006	23.5289	22.9111		23.9483	23.6799	23.9156	23.6654	22.446	21.9006	23.5289	22.9111		+	0.0192128
Clo1313_1792	NADH dehydrogenase (quinone)	75	25.1417	24.5455	24.9279	24.5011	23.5291	22.8258	24.5978	24.1754		25.1417	24.5455	24.9279	24.5011	23.5291	22.8258	24.5978	24.1754		+	0.0393193
Clo1313_1793	NADH dehydrogenase (ubiquinone) 24 kDa subunit	14	23.1	23.5086	23.2311	23.7907	21.9258	19.3226	22.9827	23.0347		23.1	23.5086	23.2311	23.7907	21.9258	19.3226	22.9827	23.0347			0.108291
Clo1313_1794	Stage II sporulation protein E	19	19.2338	17.6191	17.6363	15.8644	17.3917		15.4243	15.6677		19.2338	17.6191	17.6363	15.8644	17.3917	10.1673	15.4243	15.6677			0.45903
Clo1313_1795	putative PAS/PAC sensor protein	46	22.686	21.8011	20.8784	18.3108	16.424	17.5907	20.1555	18.406		22.686	21.8011	20.8784	18.3108	16.424	17.5907	20.1555	18.406			0.0546503
Clo1313_1796	hypothetical protein	10	23.9915	23.7389	24.0958	23.1474	23.628	22.0719	24.855	23.145		23.9915	23.7389	24.0958	23.1474	23.628	22.0719	24.855	23.145			0.613586
Clo1313_1797	aminoglycoside phosphotransferase	36	25.3975	25.6775	25.7229	25.7331	24.7777	25.246	25.8259	25.7497		25.3975	25.6775	25.7229	25.7331	24.7777	25.246	25.8259	25.7497			0.0503916
Clo1313_1798	acetaldehyde dehydrogenase (EC 1.2.1.10)/alcohol dehydrogenase AdhE (EC 1.1.1.1)	112	25.8586	25.5476	26.7516	26.4061	25.409	25.1109	26.5528	26.3562		25.8586	25.5476	26.7516	26.4061	25.409	25.1109	26.5528	26.3562		+	0.00846932
Clo1313_1799	CoA-binding domain protein	20	22.1123	22.5055	20.7607	21.7823	21.0861	21.8654	22.7033	22.6654		22.1123	22.5055	20.7607	21.7823	21.0861	21.8654	22.7033	22.6654			0.107226
Clo1313_1803	polyribonucleotide nucleotidyltransferase	55	21.3197	21.1708	20.2748	20.155	18.9091	20.611	20.5125	20.1012		21.3197	21.1708	20.2748	20.155	18.9091	20.611	20.5125	20.1012			0.255868
Clo1313_1804	SSU ribosomal protein S15P	9	22.8796	22.7897	21.1699	22.3396	19.412	19.8159	22.1031	21.0131		22.8796	22.7897	21.1699	22.3396	19.412	19.8159	22.1031	21.0131		+	0.0227203
Clo1313_1808	glycoside hydrolase family 9	41	13.3074			16.6409	17.7057	18.2838	13.3532	17.2288		13.3074	12.1662	11.9631	16.6409	17.7057	18.2838	13.3532	17.2288			0.25287
Clo1313_1809	cellulose 1,4-beta-cellobiosidase (EC 3.2.1.91)	46	19.9588	17.6757	18.6556	21.49	23.8672	22.3753	17.7006	21.0578		19.9588	17.6757	18.6556	21.49	23.8672	22.3753	17.7006	21.0578			0.230182
Clo1313_1810	hypothetical protein	26	13.4028	14.6353	12.895	12.5968	15.1401	12.7848	14.4327	12.6864		13.4028	14.6353	12.895	12.5968	15.1401	12.7848	14.4327	12.6864			0.679513
Clo1313_1811	protein of unknown function DUF711	28	19.1643	18.7202			17.3359	19.7911	19.7826	18.4167		19.1643	18.7202	11.8941	12.6202	17.3359	19.7911	19.7826	18.4167		+	0.00692305
Clo1313_1813	periplasmic sensor diguanylate cyclase/phosphodiesterase	22	17.4012	17.8373	16.689	14.5481			15.2102	17.6763		17.4012	17.8373	16.689	14.5481	13.5386	10.8979	15.2102	17.6763			0.0810154
Clo1313_1816	glycoside hydrolase family 5	6	14.9142	17.3887	14.8912		15.5501					14.9142	17.3887	14.8912	11.6807	15.5501	11.6726	9.46512	11.1551			0.183494
Clo1313_1817	type 3a cellulose-binding domain protein	7		16.6319			12.7746	16.4641	12.4192	16.399		11.8574	16.6319	12.4352	11.6455	12.7746	16.4641	12.4192	16.399			0.73874
Clo1313_1819	copper amine oxidase-like domain-containing protein	59	20.6197	22.0074	19.1218	16.2491	22.0657	19.0115	20.6344	15.7207		20.6197	22.0074	19.1218	16.2491	22.0657	19.0115	20.6344	15.7207			0.431918
Clo1313_1820	methyl-accepting chemotaxis sensory transducer	42	20.3164	20.555	20.1091	19.076	18.3415	17.7211	19.7411	18.5081		20.3164	20.555	20.1091	19.076	18.3415	17.7211	19.7411	18.5081			0.070284
Clo1313_1823	protein of unknown function DUF74	6	19.3219	19.953	19.0285	18.9513		19.8146	19.6355	18.562		19.3219	19.953	19.0285	18.9513	11.1424	19.8146	19.6355	18.562			0.57453
Clo1313_1826	RbsD or FucU transport	10					24.5321	22.3664				11.0589	12.9123	12.1496	11.3509	24.5321	22.3664	10.8892	11.9996		+	0.00103957
Clo1313_1827	iron-containing alcohol dehydrogenase	27	16.8677	16.2168	13.0323		23.7922	22.3697	14.0875	13.637		16.8677	16.2168	13.0323	11.1397	23.7922	22.3697	14.0875	13.637		+	0.000889618
Clo1313_1828	periplasmic binding protein/LacI transcriptional regulator	21	21.8063	21.5477	19.0899	18.2417	26.9689	26.1609	20.7246	19.5755		21.8063	21.5477	19.0899	18.2417	26.9689	26.1609	20.7246	19.5755		+	0.000686137
Clo1313_1829	inner-membrane translocator	6					18.6262	20.2733				12.5097	11.6445	11.3863	12.4371	18.6262	20.2733	10.9781	13.2286		+	0.00558327
Clo1313_1830	ABC transporter related protein	37					20.8118	20.8624				12.8938	12.9685	12.2957	11.1712	20.8118	20.8624	11.1024	11.8885		+	0.000117924
Clo1313_1831	ROK family protein	25			23.0276	20.5091	22.9279	19.57	23.712	21.0592		13.2484	11.4787	23.0276	20.5091	22.9279	19.57	23.712	21.0592		+	0.0158318
Clo1313_1832	PfkB domain protein	28			22.2896	20.5537	22.0365	20.8929	22.5671	20.7742		13.4238	12.2986	22.2896	20.5537	22.0365	20.8929	22.5671	20.7742		+	0.00262344
Clo1313_1833	Alcohol dehydrogenase GroES domain protein	38	19.1443	17.9903	25.276	23.66	25.1511	23.7985	25.626	24.5565		19.1443	17.9903	25.276	23.66	25.1511	23.7985	25.626	24.5565		+	0.00611143
Clo1313_1846	GMP synthase, large subunit	44	19.4964	18.2088	20.0265	19.6767	18.0159	19.1047	21.3214	17.9338		19.4964	18.2088	20.0265	19.6767	18.0159	19.1047	21.3214	17.9338			0.749482
Clo1313_1847	glutamate dehydrogenase (NADP) (EC 1.4.1.4)	48	21.7603	22.0955	22.0251	21.9633	24.11	22.6939	24.7555	23.2044		21.7603	22.0955	22.0251	21.9633	24.11	22.6939	24.7555	23.2044			0.118196
Clo1313_1848	oxidoreductase FAD/NAD(P)-binding domain protein	27	19.8574	19.4247	20.3955	20.2928	20.5439	20.8162	21.894	21.0158		19.8574	19.4247	20.3955	20.2928	20.5439	20.8162	21.894	21.0158		+	0.0315758
Clo1313_1849	sulfide dehydrogenase (flavoprotein) subunit SudA (EC 1.8.1.-)	37	20.3264	20.0827	20.992	20.2996	20.7449	21.083	21.7294	20.9619		20.3264	20.0827	20.992	20.2996	20.7449	21.083	21.7294	20.9619			0.161561
Clo1313_1851	conserved hypothetical protein	6	15.4499			14.9341		15.7838	17.7692	19.4388		15.4499	10.3485	11.7554	14.9341	13.1326	15.7838	17.7692	19.4388			0.2128
Clo1313_1852	protein of unknown function DUF111	23	17.0484	15.3482	17.9353	14.8256	17.7456	16.5801	17.4391	16.6037		17.0484	15.3482	17.9353	14.8256	17.7456	16.5801	17.4391	16.6037			0.861458
Clo1313_1853	1-(5-phosphoribosyl)-5-amino-4-imidazole- carboxylate (AIR) carboxylase	15	16.8217	17.5361	16.2459	17.744	14.7262	18.4586	18.868	18.1221		16.8217	17.5361	16.2459	17.744	14.7262	18.4586	18.868	18.1221			0.633229
Clo1313_1854	Domain of unknown function DUF2520	15	14.4016	15.3221	11.8236	15.2099		16.8803	16.6246	16.1329		14.4016	15.3221	11.8236	15.2099	12.515	16.8803	16.6246	16.1329			0.600263
Clo1313_1856	Peptide chain release factor 2	11	18.2343		18.1789		16.138	12.3905	17.974			18.2343	11.9871	18.1789	11.6841	16.138	12.3905	17.974	12.1908			0.995696
Clo1313_1859	transcriptional regulator, AsnC family	7	17.4414		18.7014	11.7479	14.4923		19.1803			17.4414	10.7699	18.7014	11.7479	14.4923	12.6522	19.1803	11.777			0.963521
Clo1313_1861	hypothetical protein	20	20.2182	20.2566	18.0623	16.9968	17.4488	16.9802	18.271	17.5668		20.2182	20.2566	18.0623	16.9968	17.4488	16.9802	18.271	17.5668		+	0.0104885
Clo1313_1862	thioredoxin	15	23.6651	24.2503	24.1187	23.6787	25.1645	24.5253	24.6664	24.3517		23.6651	24.2503	24.1187	23.6787	25.1645	24.5253	24.6664	24.3517			0.147612
Clo1313_1867	maltodextrin phosphorylase	53	19.9361	21.0642	17.4039	17.7431	19.9357	20.2321	17.5202	18.4623		19.9361	21.0642	17.4039	17.7431	19.9357	20.2321	17.5202	18.4623		+	0.0127462
Clo1313_1873	PpiC-type peptidyl-prolyl cis-trans isomerase	32	17.6484	19.3884	18.997	18.027	19.9605	19.6057	19.7979	19.5214		17.6484	19.3884	18.997	18.027	19.9605	19.6057	19.7979	19.5214			0.275468
Clo1313_1874	signal peptidase I (EC:3.4.21.89). Serine peptidase. MEROPS family S26A	5	16.5373		14.8615	12.4358		16.6596	17.2993	17.1136		16.5373	13.7462	14.8615	12.4358	12.1666	16.6596	17.2993	17.1136			0.444965
Clo1313_1875	fructose-bisphosphate aldolase (EC 4.1.2.13)	41	24.6242	24.3362	24.9939	25.2925	24.3132	24.6387	25.7746	26.0244		24.6242	24.3362	24.9939	25.2925	24.3132	24.6387	25.7746	26.0244		+	0.00625274
Clo1313_1876	phosphofructokinase	47	24.6064	23.8443	24.0498	23.4316	24.439	24.4839	24.8661	24.2603		24.6064	23.8443	24.0498	23.4316	24.439	24.4839	24.8661	24.2603			0.319965
Clo1313_1878	L-lactate dehydrogenase	33	24.2563	23.681	24.3651	23.5275	22.5909	23.4873	24.1649	24.2389		24.2563	23.681	24.3651	23.5275	22.5909	23.4873	24.1649	24.2389			0.220493
Clo1313_1879	malic protein NAD-binding protein	48	25.4334	24.7862	24.5239	23.9166	22.6487	23.1287	25.0212	23.9469		25.4334	24.7862	24.5239	23.9166	22.6487	23.1287	25.0212	23.9469			0.0518009
Clo1313_1881	NAD(P)-dependent iron-only hydrogenase catalytic subunit	61	24.2877	24.2066	23.1533	23.1308	23.3344	23.6612	23.5663	23.7779		24.2877	24.2066	23.1533	23.1308	23.3344	23.6612	23.5663	23.7779		+	0.00629864
Clo1313_1882	NAD(P)-dependent iron-only hydrogenase diaphorase component flavoprotein	54	24.857	24.4171	23.3889	23.499	23.263	23.8985	24.1067	24.1096		24.857	24.4171	23.3889	23.499	23.263	23.8985	24.1067	24.1096		+	0.0381221
Clo1313_1883	NAD(P)-dependent iron-only hydrogenase iron-sulfur protein	15	23.7941	23.3564	21.0933	22.4804	22.3728	22.3905	22.382	22.6528		23.7941	23.3564	21.0933	22.4804	22.3728	22.3905	22.382	22.6528			0.105088
Clo1313_1885	NAD(P)-dependent iron-only hydrogenase diaphorase component iron-sulfur protein	14	24.3391	22.3424	20.5259	20.6294	22.3329	21.4724	21.4585	20.1798		24.3391	22.3424	20.5259	20.6294	22.3329	21.4724	21.4585	20.1798			0.107463
Clo1313_1887	DRTGG domain protein	6		20.8307		19.9059	18.2124	19.9353	18.9684	20.2981		10.974	20.8307	12.1305	19.9059	18.2124	19.9353	18.9684	20.2981			0.771363
Clo1313_1888	Fe-S cluster domain protein	26	14.3314	12.3757	15.1658		14.0122	12.6868	13.9164	13.0973		14.3314	12.3757	15.1658	11.775	14.0122	12.6868	13.9164	13.0973			0.99928
Clo1313_1891	TGS domain-containing protein	45	18.5203	18.1017	19.2922	16.0307	18.1847	16.1217	17.9656	16.5155		18.5203	18.1017	19.2922	16.0307	18.1847	16.1217	17.9656	16.5155			0.851195
Clo1313_1896	bacterial peptide chain release factor 3 (bRF-3)	20	15.4697	15.1251	14.2686	13.1814	13.8938	16.7151	14.5638	15.5752		15.4697	15.1251	14.2686	13.1814	13.8938	16.7151	14.5638	15.5752			0.518029
Clo1313_1897	conserved repeat domain protein	26				15.9865	19.079	19.4483				11.714	10.9341	9.9689	15.9865	19.079	19.4483	11.1035	13.1851			0.0751689
Clo1313_1901	NAD+ synthetase	18	16.0642	14.8014	16.2044	13.5811	14.2907	16.6716	17.2298	13.8574		16.0642	14.8014	16.2044	13.5811	14.2907	16.6716	17.2298	13.8574			0.980046
Clo1313_1902	valyl-tRNA synthetase (EC 6.1.1.9)	61	20.0458	18.8697	20.5503	19.3499	18.9784	19.5781	19.407	18.9945		20.0458	18.8697	20.5503	19.3499	18.9784	19.5781	19.407	18.9945			0.679712
Clo1313_1906	hypothetical protein	36	18.6096	19.1484	16.9151	16.2387	14.6485	14.3061	16.4838	16.3326		18.6096	19.1484	16.9151	16.2387	14.6485	14.3061	16.4838	16.3326		+	0.000924735
Clo1313_1907	class II aldolase/adducin family protein	13	18.4425	17.6305	17.8553				18.1815	14.7546		18.4425	17.6305	17.8553	12.067	13.7086	11.0853	18.1815	14.7546			0.295678
Clo1313_1914	ATPase AAA-2 domain protein	32	17.2715	16.8173	17.6194	15.8474	17.092	16.4463	17.3895	11.9118		17.2715	16.8173	17.6194	15.8474	17.092	16.4463	17.3895	11.9118			0.657805
Clo1313_1916	excinuclease ABC, A subunit	45	18.9467	19.5118	18.6548	17.6649	18.6622	18.9495	17.0866	18.8901		18.9467	19.5118	18.6548	17.6649	18.6622	18.9495	17.0866	18.8901			0.432709
Clo1313_1918	Excinuclease ABC subunit B	21	15.1062	13.7839	14.1178	13.0047	14.837		13.8454	13.7585		15.1062	13.7839	14.1178	13.0047	14.837	10.1643	13.8454	13.7585			0.748052
Clo1313_1921	DNA topoisomerase (ATP-hydrolyzing)	18	16.9392	16.4114	13.0739	16.7401	11.9216	16.7097	12.1352			16.9392	16.4114	13.0739	16.7401	11.9216	16.7097	12.1352	11.4631			0.294303
Clo1313_1922	DNA gyrase subunit B domain protein	17	13.6112	17.5936	13.2012		17.0625	17.4012		15.5969		13.6112	17.5936	13.2012	12.97	17.0625	17.4012	11.2425	15.5969			0.297241
Clo1313_1929	methyl-accepting chemotaxis sensory transducer	34	20.6557	19.8598	17.2085	10.7625			11.0801			20.6557	19.8598	17.2085	10.7625	11.1552	11.1176	11.0801	12.3403			0.0527814
Clo1313_1931	phosphoserine aminotransferase apoenzyme (EC 2.6.1.52)	30	21.8315	21.1432	20.7576	21.1885	20.4679	20.6557	20.119	20.9693		21.8315	21.1432	20.7576	21.1885	20.4679	20.6557	20.119	20.9693			0.227793
Clo1313_1938	homoserine dehydrogenase (EC 1.1.1.3)	30	18.0691	19.077	17.1229	18.0035	17.1441	19.3741	18.5884	18.7073		18.0691	19.077	17.1229	18.0035	17.1441	19.3741	18.5884	18.7073			0.659955
Clo1313_1944	isocitrate dehydrogenase (NADP) (EC 1.1.1.42)	49	22.3555	22.0014	21.718	21.0477	21.51	22.2156	21.9206	22.438		22.3555	22.0014	21.718	21.0477	21.51	22.2156	21.9206	22.438			0.305855
Clo1313_1945	protein of unknown function DUF815	29	17.4012	17.7547	18.4688	17.5123	16.9308	17.9601	18.0843	18.1969		17.4012	17.7547	18.4688	17.5123	16.9308	17.9601	18.0843	18.1969			0.544569
Clo1313_1946	aldo/keto reductase	23	19.7239	20.4948	20.9266	21.0987	20.2642	20.606	22.2293	21.5969		19.7239	20.4948	20.9266	21.0987	20.2642	20.606	22.2293	21.5969		+	0.031173
Clo1313_1947	glycogen/starch synthase, ADP-glucose type	17	17.7529	17.8955	15.8619				14.5473			17.7529	17.8955	15.8619	10.6695	11.3652	11.9947	14.5473	12.2748			0.132764
Clo1313_1953	D-isomer specific 2-hydroxyacid dehydrogenase NAD-binding protein	12	17.6269	17.6588	16.9603	17.1007	17.3821	18.0167	18.6273	18.4181		17.6269	17.6588	16.9603	17.1007	17.3821	18.0167	18.6273	18.4181		+	0.0160399
Clo1313_1954	cellobiose phosphorylase (EC 2.4.1.20)	67	21.9792	21.5539	20.9492	20.6913	20.6461	22.4498	22.2617	22.2354		21.9792	21.5539	20.9492	20.6913	20.6461	22.4498	22.2617	22.2354			0.319953
Clo1313_1958	type 3a cellulose-binding domain protein	8				14.3676		18.4926	13.2765	17.045		9.64485	10.7289	11.3689	14.3676	14.0487	18.4926	13.2765	17.045			0.186699
Clo1313_1960	glycoside hydrolase family 8	26	19.3122	18.0645	19.5766	18.7832	21.869	20.4259	17.6629	18.8557		19.3122	18.0645	19.5766	18.7832	21.869	20.4259	17.6629	18.8557			0.0879512
Clo1313_1963	methyl-accepting chemotaxis sensory transducer	39	20.8393	20.4585	20.568	17.8914	18.4937	18.5438	20.3406	17.7031		20.8393	20.4585	20.568	17.8914	18.4937	18.5438	20.3406	17.7031			0.502182
Clo1313_1964	Alanine--glyoxylate transaminase	24	22.3366	22.563	21.887	21.2502	19.7057	21.7489	21.9344	21.8759		22.3366	22.563	21.887	21.2502	19.7057	21.7489	21.9344	21.8759			0.287102
Clo1313_1967	glutamate-5-semialdehyde dehydrogenase (EC 1.2.1.41)	32	19.737	19.5319	20.4977	19.7858	19.9233	20.9817	20.7438	20.3978		19.737	19.5319	20.4977	19.7858	19.9233	20.9817	20.7438	20.3978			0.329625
Clo1313_1969	peptidase S1 and S6 chymotrypsin/Hap	24	18.7652	17.0008	15.1252							18.7652	17.0008	15.1252	11.9399	12.8163	12.5375	10.9352	12.7711		+	0.046295
Clo1313_1971	Dockerin type 1	14		11.3607			18.2945	17.6597		15.7439		11.8788	11.3607	11.6358	11.3116	18.2945	17.6597	11.7966	15.7439		+	0.0298806
Clo1313_1972	twitching motility protein	7	15.6781	17.3887	16.6886							15.6781	17.3887	16.6886	10.2892	10.814	11.3871	11.2254	12.1396			0.24042
Clo1313_1976	ATPase associated with various cellular activities AAA_3	13	15.5184	16.6405	14.2806	15.0111	15.9925	15.2692	15.4893	15.1792		15.5184	16.6405	14.2806	15.0111	15.9925	15.2692	15.4893	15.1792			0.208329
Clo1313_1979	protein of unknown function UPF0027	20	11.6877	15.3883	15.0716	15.972	15.1736	16.814	15.7294	16.3695		11.6877	15.3883	15.0716	15.972	15.1736	16.814	15.7294	16.3695			0.397356
Clo1313_1980	peptidase C11 clostripain	19	14.3337	12.8874	14.3288	13.6962	13.3313	12.9486	14.2823	12.6733		14.3337	12.8874	14.3288	13.6962	13.3313	12.9486	14.2823	12.6733			0.7622
Clo1313_1985	cadmium-translocating P-type ATPase	16	16.0871	16.7177	15.2741	16.3282		15.987	15.4196	14.693		16.0871	16.7177	15.2741	16.3282	10.9067	15.987	15.4196	14.693			0.500798
Clo1313_1986	copper amine oxidase-like domain-containing protein	9	17.2817	14.2004	13.5957			11.1574		12.8574		17.2817	14.2004	13.5957	10.0655	11.9337	11.1574	12.4019	12.8574			0.188918
Clo1313_1990	Spore coat protein CotH	11					16.3809	13.8766				13.0802	11.3152	10.1045	11.5034	16.3809	13.8766	11.4713	11.2136			0.0723138
Clo1313_1992	aldo/keto reductase	20	18.8218	17.5273	17.4867		15.9885	16.9485	19.338	16.1957		18.8218	17.5273	17.4867	11.7505	15.9885	16.9485	19.338	16.1957			0.513831
Clo1313_1993	glutaredoxin-like protein, YruB-family	11	20.2808	19.4452	18.652	15.1262	20.0973	16.5541	20.3479	17.5579		20.2808	19.4452	18.652	15.1262	20.0973	16.5541	20.3479	17.5579			0.577935
Clo1313_1994	AMP-dependent synthetase and ligase	44	16.8801	14.2435	15.5678		14.5698		14.5944	16.5701		16.8801	14.2435	15.5678	10.3545	14.5698	12.487	14.5944	16.5701			0.598405
Clo1313_2004	UvrD/REP helicase	17	15.5656	14.1121	15.5303	10.6287		12.3818	14.5135	13.0323		15.5656	14.1121	15.5303	10.6287	10.8994	12.3818	14.5135	13.0323			0.499651
Clo1313_2005	SMC domain protein	31	17.6283	18.7987	17.826	17.5901	15.1499	17.2443	18.3541	16.4816		17.6283	18.7987	17.826	17.5901	15.1499	17.2443	18.3541	16.4816			0.399918
Clo1313_2006	ADP-ribosylation/Crystallin J1	18	12.4607	15.1231	11.6463	10.5953			13.3246	12.8019		12.4607	15.1231	11.6463	10.5953	9.53041	12.8341	13.3246	12.8019			0.343053
Clo1313_2015	Glucose-6-phosphate isomerase	39	21.485	22.2299	21.055	20.7832	20.8534	21.446	22.0999	21.7463		21.485	22.2299	21.055	20.7832	20.8534	21.446	22.0999	21.7463			0.120473
Clo1313_2017	phenylalanyl-tRNA synthetase beta subunit (EC 6.1.1.20)	72	20.1687	18.9156	18.376	18.7258	18.4692	16.5538	18.1133	17.5138		20.1687	18.9156	18.376	18.7258	18.4692	16.5538	18.1133	17.5138			0.220646
Clo1313_2018	phenylalanyl-tRNA synthetase, alpha subunit (EC 6.1.1.20)	24	20.6204	18.3893	19.5352	17.5041	19.5304	15.7839	18.9612	17.3612		20.6204	18.3893	19.5352	17.5041	19.5304	15.7839	18.9612	17.3612			0.773882
Clo1313_2020	broad-specificity cellobiase (EC 3.2.1.21)	24	17.8843	16.5861	18.4316	16.9687	16.5768	15.2343	19.2757	15.9761		17.8843	16.5861	18.4316	16.9687	16.5768	15.2343	19.2757	15.9761			0.612581
Clo1313_2027	UvrD/REP helicase	8			13.8797	12.6158		18.3489	13.6414			12.5554	11.4782	13.8797	12.6158	10.8411	18.3489	13.6414	11.9931			0.824198
Clo1313_2030	response regulator receiver and ANTAR domain protein	8	15.5202		14.4145	14.2143	17.0864	15.9264	13.964			15.5202	11.6985	14.4145	14.2143	17.0864	15.9264	13.964	12.1394			0.270857
Clo1313_2031	L-glutamine synthetase (EC 6.3.1.2)	28	20.3293	19.7911	19.5347	20.025	21.983	20.113	19.9699	19.1788		20.3293	19.7911	19.5347	20.025	21.983	20.113	19.9699	19.1788			0.350446
Clo1313_2032	glutamate synthase (NADPH) GltB3 subunit (EC 1.4.1.13)	12	12.7742		15.7687	18.5674	20.4537		17.4761			12.7742	10.3974	15.7687	18.5674	20.4537	10.4068	17.4761	12.2322			0.641228
Clo1313_2033	FAD-dependent pyridine nucleotide-disulfide oxidoreductase	24			13.7526	17.6168	18.1183		16.5401			10.7973	12.0282	13.7526	17.6168	18.1183	12.5918	16.5401	10.409			0.5837
Clo1313_2034	iron-sulfur cluster-binding protein	8				18.098	20.8344	15.9019	17.5088			11.4606	11.9647	11.5315	18.098	20.8344	15.9019	17.5088	11.5023			0.43164
Clo1313_2035	glutamate synthase (NADPH) GltB2 subunit (EC 1.4.1.13)	35	14.7599	13.1598	16.2686	19.1795	20.075	15.3443	17.765	15.3156		14.7599	13.1598	16.2686	19.1795	20.075	15.3443	17.765	15.3156			0.396453
Clo1313_2036	glutamine amidotransferase class-II	22	10.6039		14.5372	20.7504	21.276	14.9639	18.7235			10.6039	11.6483	14.5372	20.7504	21.276	14.9639	18.7235	12.2548			0.379005
Clo1313_2038	glutamine synthetase catalytic region	47	16.3599	16.1744	16.6727	18.9103	19.3777	16.8254	18.2548	16.7772		16.3599	16.1744	16.6727	18.9103	19.3777	16.8254	18.2548	16.7772			0.575118
Clo1313_2045	ribonuclease PH	19	19.504	18.9118	17.6672	17.2954	17.3431	20.2801	18.9523	19.7308		19.504	18.9118	17.6672	17.2954	17.3431	20.2801	18.9523	19.7308			0.419794
Clo1313_2047	UDP-galactose 4-epimerase (EC 5.1.3.2)	28	21.9421	21.8693	21.3811	21.3607	22.7848	23.4273	22.3024	22.7961		21.9421	21.8693	21.3811	21.3607	22.7848	23.4273	22.3024	22.7961		+	0.0141401
Clo1313_2048	cell wall hydrolase/autolysin	19	17.1908	16.2255			16.8386		14.9922	17.4381		17.1908	16.2255	11.7397	10.5825	16.8386	12.3643	14.9922	17.4381			0.125959
Clo1313_2049	type IV pilus assembly protein PilM	17	17.4152	18.3722	18.4837	18.5743	19.91	19.3574	19.4981	19.7396		17.4152	18.3722	18.4837	18.5743	19.91	19.3574	19.4981	19.7396		+	0.0291272
Clo1313_2051	Holliday junction DNA helicase subunit RuvB	15	18.2576	17.3882	16.2386	12.8983	16.3248	14.742	15.4645	13.8461		18.2576	17.3882	16.2386	12.8983	16.3248	14.742	15.4645	13.8461			0.235673
Clo1313_2054	argininosuccinate synthase (EC 6.3.4.5)	37	22.263	21.9789	22.0138	20.3677	20.5175	19.4952	21.3103	20.7275		22.263	21.9789	22.0138	20.3677	20.5175	19.4952	21.3103	20.7275			0.166849
Clo1313_2055	argininosuccinate lyase	31	20.4879	19.3695	19.1792	19.6282	18.6426	17.6521	20.2565	19.0373		20.4879	19.3695	19.1792	19.6282	18.6426	17.6521	20.2565	19.0373			0.196444
Clo1313_2057	hypothetical protein	8	12.9183		14.2463		16.4244	16.0465		14.6106		12.9183	12.293	14.2463	13.7416	16.4244	16.0465	11.777	14.6106			0.0874969
Clo1313_2058	polysaccharide deacetylase	13	16.4587	17.3049	14.7235	16.19	13.3331	15.8147	14.39	18.4628		16.4587	17.3049	14.7235	16.19	13.3331	15.8147	14.39	18.4628			0.617363
Clo1313_2059	sulfatase	13	11.1325	10.3265		11.8233		10.6296		11.655		11.1325	10.3265	10.6977	11.8233	11.9911	10.6296	11.8979	11.655			0.569419
Clo1313_2067	4Fe-4S ferredoxin iron-sulfur binding domain protein	7	15.1621	13.4668	15.4505							15.1621	13.4668	15.4505	12.7557	11.8861	11.6165	12.6563	9.74366			0.232842
Clo1313_2069	protein of unknown function UPF0044	6	19.8523	18.5266	18.1116	18.897	18.6183	19.5249	18.412	19.7775		19.8523	18.5266	18.1116	18.897	18.6183	19.5249	18.412	19.7775			0.820638
Clo1313_2071	GTP-binding protein Obg/CgtA	16	18.0834	17.7377	17.3257	16.4092	17.7568	17.3957	18.0936	18.3674		18.0834	17.7377	17.3257	16.4092	17.7568	17.3957	18.0936	18.3674			0.0849891
Clo1313_2072	LSU ribosomal protein L27P	9	21.7846	21.1708	19.6225	21.1615			19.9649	19.2399		21.7846	21.1708	19.6225	21.1615	10.4315	12.9213	19.9649	19.2399		+	0.00266373
Clo1313_2074	LSU ribosomal protein L21P	14	22.1546	21.3718	20.612	20.4252	20.771	19.7684	21.1217	20.5115		22.1546	21.3718	20.612	20.4252	20.771	19.7684	21.1217	20.5115			0.135346
Clo1313_2076	Protein of unknown function DUF2344	9	15.271	15.8537	15.5361		14.7991		15.4788			15.271	15.8537	15.5361	11.9338	14.7991	10.723	15.4788	9.49821			0.718759
Clo1313_2077	Radical SAM domain protein	16	16.0076	16.872	16.5574	16.1127	16.9219	16.5838	16.9896	17.0749		16.0076	16.872	16.5574	16.1127	16.9219	16.5838	16.9896	17.0749			0.343187
Clo1313_2078	hypothetical protein	13	18.5418		18.4717		17.6997	18.5114	15.3559			18.5418	10.8942	18.4717	10.4206	17.6997	18.5114	15.3559	11.6736			0.7202
Clo1313_2080	Holliday junction resolvase YqgF	8	14.2244	18.5387	16.1993	17.1259			15.3946	17.9081		14.2244	18.5387	16.1993	17.1259	9.61405	11.6161	15.3946	17.9081			0.0828906
Clo1313_2082	protein of unknown function DUF965	7	13.0628	15.6518	14.3152	18.6643	18.2035	16.9663	18.5785	16.8319		13.0628	15.6518	14.3152	18.6643	18.2035	16.9663	18.5785	16.8319			0.396356
Clo1313_2084	phosphoryl transfer system HPr	12	22.2678	21.6842	21.5852	22.2774	22.2821	22.1828	23.1536	22.3735		22.2678	21.6842	21.5852	22.2774	22.2821	22.1828	23.1536	22.3735			0.317571
Clo1313_2086	RNAse R (EC 3.1.-.-)	13			13.4512		15.286	14.3818				12.4062	11.8481	13.4512	12.9076	15.286	14.3818	12.4753	10.8849		+	0.0368024
Clo1313_2088	metal dependent phosphohydrolase	17	18.6116	20.0694	17.9745	19.9085	18.2745	21.3995	19.6767	20.7726		18.6116	20.0694	17.9745	19.9085	18.2745	21.3995	19.6767	20.7726			0.824959
Clo1313_2090	enolase	39	22.4797	22.1986	22.1249	21.7171	23.3068	22.7683	22.1269	22.1171		22.4797	22.1986	22.1249	21.7171	23.3068	22.7683	22.1269	22.1171		+	0.0447294
Clo1313_2092	phosphoglycerate mutase (EC 5.4.2.1)	44	22.4312	20.9082	23.5101	22.7986	22.8725	22.7329	23.9955	23.0402		22.4312	20.9082	23.5101	22.7986	22.8725	22.7329	23.9955	23.0402			0.178898
Clo1313_2093	triosephosphate isomerase (EC 5.3.1.1)	25	24.5827	24.2125	23.8622	24.1499	23.6969	24.7094	23.7328	24.2951		24.5827	24.2125	23.8622	24.1499	23.6969	24.7094	23.7328	24.2951			0.790748
Clo1313_2094	phosphoglycerate kinase (EC 2.7.2.3)	59	25.0741	24.5435	24.8566	24.5689	24.2632	24.9942	24.5771	25.4746		25.0741	24.5435	24.8566	24.5689	24.2632	24.9942	24.5771	25.4746			0.84136
Clo1313_2095	glyceraldehyde-3-phosphate dehydrogenase, type I	46	25.8005	26.7058	26.7434	27.6122	25.2504	26.1361	26.6488	27.9808		25.8005	26.7058	26.7434	27.6122	25.2504	26.1361	26.6488	27.9808			0.218475
Clo1313_2097	Beta-ketoacyl synthase	39	14.7139		14.5408	12.7232	14.9329		14.2002			14.7139	12.3947	14.5408	12.7232	14.9329	10.7338	14.2002	12.1726			0.972396
Clo1313_2104	RNA methyltransferase, TrmH family, group 2	5	17.6677		15.9666			18.1762	14.2542	18.9638		17.6677	11.9207	15.9666	11.8329	12.705	18.1762	14.2542	18.9638			0.889215
Clo1313_2112	anti-sigma regulatory factor, serine/threonine protein kinase	10	16.2361		15.9872		19.7176	20.9612				16.2361	10.7091	15.9872	12.9151	19.7176	20.9612	11.0255	11.8541			0.0659508
Clo1313_2114	Phosphotransferase system, phosphocarrier protein HPr	3	19.3478	19.0151	14.9646	17.6985		19.2914	18.465	18.3207		19.3478	19.0151	14.9646	17.6985	10.1105	19.2914	18.465	18.3207			0.591881
Clo1313_2116	glycogen debranching enzyme	31	15.8622	16.0614	14.2144	16.6358		15.4258	14.8937	15.2907		15.8622	16.0614	14.2144	16.6358	11.9099	15.4258	14.8937	15.2907			0.540695
[truncated: 318 more rows]

## Sheet: Sheet1
			Normalized Protein Abundances (in log2) w/ blanks (RRollup 25%|2)									… with imputed values at DS = 2.2, W=3 (highlighted in blue and italicized)									ANOVA
[truncated: 1,231 more rows]

## Sheet: LL1210 vs LL1004
			Normalized Protein Abundances (in log2) w/ blanks (RRollup 25%|2)									… with imputed values at DS = 2.2, W=3 (highlighted in blue and italicized)									ANOVA
[truncated: 1,231 more rows]

[truncated: 1 more sheets: Gene_Lookup]
